# Supplementary material
Source: publisher site journal article supplement (https://www.spandidos-publications.com/4171/downloadSupplementary)
Supplement: Supplementary file 1 [file downloadSupplementary]

## Sheet: GSE54129_diff_logFC1_p0.05
Table SII. Differentially expressed mRNAs in GSE54129 dataset.
gene_name	logFC	AveExpr	t	P.Value	adj.P.Val	B	UP_DOWN	GSM1308392	GSM1308393	GSM1308394	GSM1308395	GSM1308396	GSM1308397	GSM1308398	GSM1308399	GSM1308400	GSM1308401	GSM1308402	GSM1308403	GSM1308404	GSM1308405	GSM1308406	GSM1308407	GSM1308408	GSM1308409	GSM1308410	GSM1308411	GSM1308412	GSM1308413	GSM1308414	GSM1308415	GSM1308416	GSM1308417	GSM1308418	GSM1308419	GSM1308420	GSM1308421	GSM1308422	GSM1308423	GSM1308424	GSM1308425	GSM1308426	GSM1308427	GSM1308428	GSM1308429	GSM1308430	GSM1308431	GSM1308432	GSM1308433
A4GNT	1.66103	5.85628	5.53644	1.59463e-07	5.75906e-07	6.4308	UP	7.4959	6.44588	6.46572	6.57373	7.19334	8.31058	6.3322	8.44131	8.67184	8.03528	8.68068	7.00161	6.91277	7.92094	7.43646	8.37145	7.13473	8.39045	4.59671	6.29486	5.60781	4.76946	4.62615	4.62282	4.39502	5.59981	7.44864	5.78424	4.75303	5.57769	8.54268	5.5155	4.45669	4.5746	6.58909	6.75151	4.65995	7.3772	5.29816	4.78667	4.58438	5.00461
AAAS	-1.11556	7.40962	-22.4591	5.22974e-47	7.30943e-44	96.4749	DOWN	6.34547	6.59891	6.21483	6.5711	6.03309	6.20128	6.43971	6.44639	6.56311	6.54534	6.70603	6.40588	6.5787	6.6046	6.32299	6.48153	6.57296	6.41467	6.75126	6.39319	6.7112	7.58362	7.5398	8.00427	7.64562	7.74134	7.57971	7.66869	8.17436	7.53236	7.53818	7.49862	7.81684	7.81275	7.74023	7.79239	8.33216	7.58525	7.85608	7.91471	7.66722	7.79584
AACS	1.27255	7.61277	10.5619	2.70689e-19	5.82648e-18	33.1629	UP	8.66669	8.98143	8.70104	8.16536	8.44853	8.60415	8.67924	8.86829	8.94211	8.99404	8.73357	8.47591	8.49434	8.58398	8.88304	8.47228	8.63615	8.81421	8.64804	8.81065	8.73728	6.48686	7.18975	8.25558	8.00174	6.78718	7.91241	7.88168	7.85677	7.69732	8.11476	7.09425	7.94128	7.5156	7.92996	7.6754	7.63226	7.84675	8.03619	7.7285	6.44446	7.28261
AADAC	3.26594	7.70359	7.92042	8.46804e-13	6.82555e-12	18.3542	UP	10.5631	10.9374	10.2826	10.6963	10.138	9.94234	10.2418	10.7418	10.5516	11.1596	10.8708	10.1715	11.047	9.70342	10.8137	9.51857	10.9551	9.57017	10.7097	10.3999	10.4344	4.76852	5.32345	7.69895	4.51349	6.02006	9.38225	4.99076	5.78754	9.54101	10.2418	5.47262	5.53386	8.94069	6.09382	4.97455	6.50827	7.3627	4.22711	6.63965	3.5096	7.96014
AAMDC	1.08147	5.36866	15.1438	1.08059e-30	1.51031e-28	59.2328	UP	5.75554	5.73651	5.84074	6.57421	6.54019	6.61809	6.20067	6.45813	6.61313	6.5351	6.57268	6.39291	6.11031	6.52231	6.62931	6.3126	6.21222	5.92554	5.79057	6.89133	5.60749	4.89189	5.22482	4.56768	4.89548	5.07904	5.33924	5.25114	5.01605	5.63732	5.22508	4.9797	4.89646	5.09311	5.09017	4.71822	5.32768	5.12679	5.68811	5.14133	5.35989	5.32563
ABAT	1.32237	5.99026	8.6795	1.2683e-14	1.33484e-13	22.5059	UP	7.36532	7.59499	6.61046	6.57825	6.69166	7.3129	6.88186	7.00661	6.88369	7.14139	7.0478	6.78314	7.63455	6.98514	7.13091	6.95117	7.37288	6.52119	8.16194	6.78574	7.70581	5.30945	5.13158	5.96269	4.65752	5.10715	6.03745	5.95312	5.46026	5.69033	6.24337	5.71318	5.13855	6.66061	4.99824	6.69373	4.21479	6.25044	5.18322	6.78795	5.31254	6.47077
ABCC3	1.0558	7.68684	7.47717	9.29151e-12	6.38887e-11	15.9915	UP	8.51742	8.56244	8.40244	8.55937	8.35999	8.64484	8.72851	8.70325	8.48445	8.51845	8.50839	8.31331	8.27809	8.9417	8.51309	8.55981	8.48811	8.59263	8.90425	8.66152	8.82609	8.19741	6.81879	8.18258	8.32375	7.53457	7.64664	7.3761	7.63245	8.19374	8.63963	7.23215	7.09879	7.82978	8.04225	8.08268	7.87854	7.45562	6.61757	8.12997	6.15617	6.74758
ABCC5	1.63839	6.20291	15.3571	3.30128e-31	5.12676e-29	60.4107	UP	7.33148	7.01631	7.50529	7.7824	7.66682	7.82421	8.02566	7.94741	7.43074	7.67324	8.24137	7.53118	7.33459	8.49673	7.84633	7.7462	7.02499	7.34273	7.03392	7.66775	6.72421	6.2826	5.64399	5.43377	5.52174	5.74081	6.83423	5.55674	5.6909	6.57802	6.94728	5.76953	6.0296	6.18086	5.83629	5.53213	5.6318	5.6247	5.41242	5.72047	5.99465	6.32404
ABCC6P1	2.19204	4.03717	15.2942	4.68251e-31	7.0625e-29	60.0635	UP	4.9463	6.82727	4.28849	6.31434	4.96485	5.20826	4.99841	6.90567	4.71331	6.48194	6.24388	7.23307	6.1808	5.90541	7.73552	5.31227	4.74455	5.09559	6.77014	6.13461	6.48527	3.30405	3.95582	4.31244	3.27935	3.27351	4.09422	3.96438	3.1787	4.15502	3.65212	3.33348	3.74332	4.6542	3.42233	3.29715	3.66804	3.16682	3.22878	4.12315	3.71007	3.2044
ABCG1	1.19796	5.8546	10.8021	6.74112e-20	1.5738e-18	34.5424	UP	6.80593	5.88269	6.77824	7.68849	6.62473	7.21346	6.42523	6.53941	6.98578	7.16078	7.26605	7.48794	7.46086	6.43107	6.72253	7.19643	7.03541	6.57077	7.0486	7.36925	5.40786	6.83638	5.98068	5.38594	4.78885	5.14627	6.34152	5.10045	5.85185	6.72099	6.23661	5.51643	6.0778	5.28162	5.45386	5.43047	5.88724	5.85076	6.23101	5.37679	5.48028	5.34483
ABHD17C	1.21959	8.64834	5.76192	5.5442e-08	2.15129e-07	7.46035	UP	9.95414	9.81469	9.55713	9.27438	9.12179	9.45915	9.8273	9.70965	9.5168	9.61644	9.70926	9.65761	9.53438	9.94542	9.89323	9.64791	9.77563	9.4374	9.95998	9.72844	10.0113	8.32647	7.16093	9.70812	9.21165	9.21615	8.58165	8.11018	8.70099	9.65185	9.71402	7.93395	8.6633	8.11016	8.28461	9.14299	7.02756	8.28731	8.0704	9.89355	5.66191	7.35772
ABHD3	1.44856	8.6661	8.62252	1.74495e-14	1.79416e-13	22.1903	UP	9.87513	9.8177	10.1944	9.91777	9.68561	9.82735	9.73189	10.2429	9.72437	9.98468	9.7181	10.1808	10.2014	9.68731	9.80407	9.70835	9.74183	9.64454	10.1225	9.82599	9.93167	8.94307	7.40123	8.34872	8.42509	7.85695	9.08888	7.69289	7.61151	8.8498	8.76195	7.56977	8.35158	8.88787	8.58203	8.30632	5.44743	8.49714	8.11086	8.21883	7.48315	7.90565
ABLIM1	1.77304	8.78186	13.4407	1.62526e-26	1.13201e-24	49.6767	UP	9.87772	10.0702	10.3949	10.4309	10.2114	10.3564	10.4946	10.4479	10.1887	10.6695	10.5372	10.2773	10.2305	10.5152	10.6131	10.0285	10.2557	10.3667	9.98891	10.2976	9.47675	9.05208	8.3078	9.19929	8.01316	8.45225	9.1225	8.03217	7.87767	9.33394	9.67548	8.09709	8.45373	7.28132	8.9052	8.77706	7.58643	8.62327	8.23116	8.6438	7.82948	8.06798
ACAD8	1.03212	7.00911	13.0455	1.56459e-25	9.42577e-24	47.4267	UP	7.79719	7.82979	7.65856	7.88372	8.05575	7.72677	7.77303	7.99732	7.91083	7.93787	7.89398	7.94486	7.83369	7.86524	7.78114	8.00593	7.84816	7.87753	7.71534	8.12244	7.9585	6.69785	6.53923	6.92678	6.99779	6.82421	7.44597	6.90976	7.20472	7.47543	7.38788	6.81703	6.62634	5.97657	7.07578	6.5751	7.15402	6.94633	6.62351	6.9521	6.54659	6.97173
ACE2	2.2581	5.60395	4.69762	6.49843e-06	1.82651e-05	2.83861	UP	9.5095	10.2421	6.32307	6.09902	5.23185	6.1565	8.26056	6.27782	5.76059	8.09905	6.13264	7.92391	10.8468	5.35741	6.46017	6.38253	7.90784	5.49784	11.4739	6.36302	11.2528	3.17294	5.12295	5.80043	3.56179	4.01703	5.3807	3.71708	3.57633	8.1149	7.20045	4.1205	3.11739	6.60317	5.18669	6.90477	3.49985	5.76	3.07569	4.04336	3.4256	3.64058
ACER2	4.42151	6.86549	12.4843	3.96258e-24	1.90104e-22	44.2159	UP	9.89755	10.2709	11.0386	10.688	10.0529	10.8001	10.4489	11.1166	10.4473	10.8522	10.8741	10.7101	10.7194	10.5164	10.8038	10.3993	10.7688	10.3053	10.6017	11.0963	9.84712	6.37686	3.86395	5.69146	6.05699	4.78525	8.2328	4.9541	3.90121	8.28118	8.85628	4.96674	4.68152	5.24027	5.52096	5.18137	3.85329	5.72848	3.89398	6.85289	5.0648	5.90231
ACKR1	-1.60974	7.79725	-5.45606	2.31054e-07	8.14261e-07	6.06994	DOWN	6.60141	6.49072	6.8364	6.61998	6.27144	6.64939	6.85345	6.03607	5.41607	5.98062	5.66525	6.43337	6.77291	6.6989	6.0305	6.89585	7.09427	6.96085	6.1749	6.20617	6.62705	8.81366	9.32619	7.4776	6.63079	8.99049	8.68826	8.54523	9.82958	7.2881	7.69616	9.74357	8.29832	6.22398	8.33931	7.51977	10.0019	8.98578	8.95934	6.12161	10.3127	7.21401
ACKR4	3.19326	5.3862	12.5856	2.20769e-24	1.1126e-22	44.797	UP	8.5338	8.21427	8.23709	7.69977	7.12788	8.29727	7.85357	8.21304	7.42224	8.58621	8.21693	8.93828	8.18495	7.65622	8.27467	7.61622	8.10592	7.62231	8.4523	8.07372	8.1736	3.48085	3.43733	4.73467	2.69831	4.04177	5.8858	4.86042	5.16485	6.28101	6.49979	4.44918	3.40732	2.84949	4.39398	3.70316	2.80625	5.05892	4.46937	3.13914	4.88187	3.62521
ACOT4	1.13379	5.88153	7.93228	7.93729e-13	6.41253e-12	18.4181	UP	7.19736	7.54609	6.0012	6.58355	6.31943	6.91801	7.17906	7.15904	6.22622	6.71463	6.7146	7.42316	6.68976	7.5103	6.71168	6.62283	6.53383	6.01278	7.36963	6.91703	7.18363	5.08039	5.92583	7.84074	5.65204	5.64832	6.10422	5.48637	5.61054	6.80284	5.90515	5.34271	5.82982	5.65973	5.84647	5.71536	5.53029	5.03454	5.82538	7.73122	5.72886	5.46091
ACOX1	1.02725	6.04278	12.3587	8.18335e-24	3.75413e-22	43.4955	UP	6.83155	6.86156	6.98501	6.89963	6.54948	6.82461	6.99065	6.98278	6.8476	6.93771	6.97099	6.69913	7.01471	6.92955	6.96977	6.84793	6.94022	6.81174	6.91414	7.24667	6.98313	5.67899	5.39462	5.90194	5.50431	5.86735	6.03747	5.80268	5.4042	6.10557	6.36702	5.46027	5.34533	6.08938	6.14072	6.14432	4.80286	5.96417	5.71956	6.46181	5.55229	5.80398
ACOX3	1.04605	6.44553	11.9106	1.09274e-22	4.09094e-21	40.9212	UP	7.41082	7.08206	7.43121	7.57006	6.9687	7.57803	7.42925	7.84111	7.16397	7.31566	7.30607	7.22912	7.1381	7.21684	7.32687	7.11188	7.31703	6.97025	7.77818	7.37347	7.26968	5.83779	6.79799	6.85742	5.90606	5.83765	6.48495	7.00985	6.82322	6.90448	6.79493	5.89451	6.08621	6.27111	6.31201	6.38971	7.49857	6.75386	6.66768	6.56418	6.78308	6.9742
ACSL3	1.36142	8.34415	11.7899	2.19901e-22	7.78754e-21	40.2266	UP	9.53742	9.26394	9.23751	9.69971	10.278	9.29413	9.36921	9.46324	9.84808	9.53377	9.46644	9.69591	9.17344	9.41336	9.30817	9.59167	9.43967	9.37235	9.47247	9.53642	9.27381	7.83023	7.97337	7.90956	8.12334	7.52416	8.80967	7.67195	6.49092	8.06069	8.62577	7.86114	7.90929	8.32191	8.80218	8.59339	5.35333	8.33828	7.81002	7.449	7.71051	9.69048
ACTA2	-1.2047	6.36636	-7.4968	8.3653e-12	5.77663e-11	16.095	DOWN	5.43754	5.14272	5.36993	5.43398	5.25239	5.40719	5.49086	5.23923	5.03221	5.2738	5.35762	5.39075	5.24024	5.75848	5.18403	5.55597	5.36511	5.38628	5.16979	5.42587	5.50554	6.81487	7.44827	5.85927	6.28146	7.03024	6.36454	7.52272	7.12193	5.90599	6.10405	7.46272	6.93736	6.20109	7.01977	7.13157	7.6197	7.24219	7.16155	5.54973	7.68539	5.92501
ACTC1	-1.61922	6.95886	-6.86225	2.35873e-10	1.32186e-09	12.8083	DOWN	5.73744	5.47173	5.9656	5.39343	5.14295	5.52439	5.55272	5.36325	5.20795	5.47734	5.18744	5.29711	5.94507	5.67539	5.12576	5.86876	5.79461	5.53058	6.43899	5.60387	6.23776	7.06182	8.53503	6.01191	6.61488	8.61701	7.78525	8.78266	8.78094	6.76971	6.1437	9.18576	7.22667	6.61258	7.73885	6.62283	10.3139	8.71313	7.3099	6.23025	8.8287	6.20056
ACTG2	-1.41452	8.0296	-6.53806	1.23616e-09	6.2119e-09	11.1818	DOWN	6.639	6.64514	6.92537	6.77933	6.94444	6.77019	6.97706	6.61575	6.56373	6.65548	6.64693	6.81447	7.00372	7.13555	6.85483	7.00717	7.33867	6.5127	6.43124	7.12436	7.2573	8.90861	9.05003	6.8308	8.08509	9.05757	8.3193	9.53324	9.40716	7.86451	7.62988	9.21261	8.29747	7.88852	8.85771	8.93732	9.63186	9.0163	9.50629	6.72789	9.75976	7.45377
ACTN1	-1.1913	8.67606	-8.56231	2.44304e-14	2.45416e-13	21.8575	DOWN	7.82805	7.75987	7.91705	7.62963	7.34822	7.57696	7.73893	7.55975	7.59011	7.49052	7.48495	7.52321	7.6119	7.74727	7.68064	7.61567	7.80342	8.03932	7.74643	7.61476	7.85349	9.18146	9.64202	8.50115	9.57131	9.25544	8.61625	9.76145	9.84929	8.30215	7.98293	9.52816	9.24468	8.69483	9.39136	9.535	10.0249	9.22649	9.54354	8.31327	10.1386	8.17616
ACVR1C	1.6051	4.79745	11.059	1.52183e-20	3.94377e-19	36.0196	UP	5.67702	5.54695	5.68694	5.97242	5.5848	6.34688	6.06825	5.89135	6.89904	6.22315	7.14562	6.46641	6.16599	6.83424	6.35772	6.30791	5.98798	6.0155	5.38455	6.95641	5.57199	5.39507	3.60478	4.03025	3.9699	4.09497	4.64073	4.53148	3.89777	4.73923	5.46459	3.94734	4.53991	5.24475	3.89193	4.15342	3.92892	4.69711	4.23486	4.16535	5.90288	4.08187
ACYP1	1.05702	7.22835	9.77612	2.50791e-17	3.97418e-16	28.6714	UP	7.90011	7.97962	8.10858	7.82531	7.85866	8.16234	8.34149	8.09318	8.19576	8.11535	8.58606	8.23036	8.23051	8.35259	8.51846	8.08463	8.27505	8.26884	7.38349	8.15762	7.79327	6.98845	6.63364	6.8022	8.17367	7.09958	6.38901	6.8764	6.35003	6.48611	7.06157	7.11725	7.00515	6.88491	7.32947	7.09266	5.76423	7.19031	6.40744	6.68698	6.45585	6.20779
ADAM28	1.23094	6.02061	6.46135	1.81935e-09	8.9236e-09	10.8027	UP	6.68436	6.78253	7.20075	7.26509	7.49294	7.15391	6.95005	7.22496	7.41975	7.08654	7.03892	7.51822	6.63543	7.15712	7.17966	7.24396	7.24791	7.12693	6.64762	6.87255	6.24089	5.87525	5.17036	5.77785	6.87864	5.38978	6.64699	5.27782	4.57562	7.23123	6.40326	5.9376	5.10158	4.72899	5.25322	5.1644	4.10556	5.98969	4.68758	4.76539	4.4804	6.0883
ADAMTS1	-2.72205	7.45407	-11.3277	3.20572e-21	9.27005e-20	37.5659	DOWN	5.14341	5.50715	4.93031	4.66073	5.77371	4.9843	4.88598	4.60163	5.07328	4.69081	5.13233	5.41524	4.8534	5.49304	4.78139	5.28028	5.98723	5.02739	5.36197	5.79554	5.08749	7.72919	8.90621	6.58448	7.10698	9.27758	8.59163	8.09746	7.66338	6.76685	7.05311	9.85977	8.27846	7.40247	8.08769	7.90062	7.39558	9.20286	8.37045	6.07816	10.8368	8.08925
ADAMTS12	-1.20029	5.45298	-9.97039	8.21603e-18	1.40841e-16	29.7778	DOWN	4.40956	4.38003	4.52842	4.71296	4.48297	4.57473	4.26873	4.75204	4.65533	4.34185	4.41293	4.26103	4.47607	4.54563	4.26382	4.39981	4.29462	4.48663	4.49141	4.12167	4.45619	5.44244	6.09811	6.1382	5.90344	6.08025	5.7384	5.98762	5.82921	5.84427	4.73287	5.96378	6.4613	6.15202	6.36112	6.66567	5.77653	5.31416	5.75493	5.71638	5.99938	5.2772
ADAMTS2	-1.30188	5.93914	-9.45193	1.603e-16	2.26564e-15	26.8331	DOWN	4.39329	5.07806	5.13136	4.99764	4.87076	5.10291	4.95733	4.59635	4.90861	4.60751	4.93118	4.60302	4.85587	5.05722	4.84362	4.66391	4.8436	5.29501	4.44087	4.94532	4.60837	6.02325	6.68158	6.17007	6.64981	6.42599	6.01814	6.25757	6.80684	6.0647	4.95893	6.18552	7.28315	6.37918	6.19273	6.85073	7.33122	5.92976	5.99424	5.88333	7.02268	5.24437
ADAMTS8	-1.01804	5.17441	-5.10555	1.12146e-06	3.56178e-06	4.53626	DOWN	4.25351	4.15305	4.37505	4.53088	4.55057	4.48261	4.36811	4.35432	4.25638	4.14944	4.01716	4.14077	4.36343	4.25844	4.22002	4.3855	4.26496	4.49986	4.33545	4.42963	4.29586	5.03629	6.79524	4.82605	4.59808	6.06435	5.96144	6.20897	6.35068	4.93069	4.60172	6.44937	4.80912	4.36857	6.23135	4.9949	7.71751	6.06038	7.16311	4.66566	7.31003	4.72848
ADAMTSL4	-1.1676	5.08559	-10.4344	5.6594e-19	1.15982e-17	32.4312	DOWN	3.93746	4.14798	4.38211	4.16499	4.20778	4.09731	3.89605	4.1551	4.26556	4.10971	3.962	3.92384	4.17982	3.95608	4.31114	4.04468	3.9031	4.10096	4.22311	4.23049	3.97931	5.24678	5.96257	5.26344	5.55937	5.33378	5.14121	5.40108	6.30205	4.44334	5.01165	5.63893	5.34097	6.24151	5.23966	4.89654	6.79172	5.71193	5.4729	5.11955	6.33553	5.1004
ADCY3	-1.14677	6.43724	-12.5291	3.05839e-24	1.49462e-22	44.4732	DOWN	5.77809	5.52231	5.62576	5.29913	5.32525	5.43324	5.55609	5.42474	5.28032	5.34778	5.26924	5.62187	5.38409	5.49417	5.4628	5.57159	5.65472	5.69034	5.23485	5.18975	5.76503	6.68342	6.95381	6.43632	6.83561	7.04713	6.24488	7.01714	7.32177	6.31859	6.1871	6.98376	7.04846	6.67803	6.4217	6.88781	7.7824	6.70091	6.90569	6.95495	7.11946	7.13556
ADGRF1	1.1035	3.73906	7.81959	1.46636e-12	1.13987e-11	17.8123	UP	5.09698	4.93225	5.53245	3.53347	3.7179	4.6155	3.8324	5.46757	4.02163	5.73385	4.88374	4.97435	4.64645	3.67696	4.22504	3.98885	3.98942	4.55033	6.36413	4.83612	5.38777	3.24359	3.28481	3.28463	3.16034	3.49317	3.90841	3.06808	3.32386	4.86249	3.37154	3.14185	3.12197	3.19196	3.57227	3.36983	3.60562	3.47022	3.4213	3.2539	3.29662	3.15458
ADGRF5	-1.08775	7.1662	-6.55276	1.1476e-09	5.79326e-09	11.2547	DOWN	6.21452	5.86559	6.11146	6.78269	6.55949	6.33555	6.40144	6.36489	6.36458	6.3075	6.21601	6.01222	6.38277	6.27628	5.98686	6.64032	5.9959	6.25841	5.93106	6.28795	5.98606	6.76003	7.99711	7.05979	6.87345	7.3849	7.73707	8.08194	7.36511	6.83654	6.42906	8.34083	7.95326	7.35788	8.64739	8.18487	6.62688	7.45996	7.34913	6.9546	8.34533	8.2013
ADGRG2	3.92553	5.3772	12.1174	3.30256e-23	1.38754e-21	42.1097	UP	8.17226	8.14653	8.36958	9.27445	8.81832	8.89089	9.02431	9.21249	9.0212	9.47971	9.2664	9.54806	8.66276	9.25861	9.44395	8.76368	8.95362	8.30314	7.17145	9.00698	5.45406	4.53462	3.40207	3.90335	3.19237	5.45738	7.19072	4.36304	3.70888	7.11635	8.08641	4.45976	4.81053	3.18828	6.04122	3.17886	3.94107	5.58823	3.73832	4.59651	4.43792	5.93463
ADH1A	2.07367	4.79075	8.79046	6.80379e-15	7.4061e-14	23.122	UP	6.30322	6.67666	6.59821	6.11397	6.68219	6.03417	5.71863	6.71387	7.17125	7.06755	6.97404	6.02359	6.2803	6.88488	6.20628	6.27956	6.13589	6.39054	7.06219	7.0323	6.87561	3.46316	3.6873	3.45224	3.28947	5.09239	4.83144	4.04585	3.83961	4.43572	5.14096	3.92625	3.31015	4.74983	3.84387	3.28221	4.12431	4.44887	3.63692	3.3322	4.70683	3.56831
ADH1C	3.81013	9.28736	7.51099	7.75294e-12	5.37857e-11	16.1699	UP	11.8296	12.0609	12.8623	12.374	12.9078	12.4742	11.7152	12.9934	13.1141	13.0095	12.9616	12.3759	12.2253	13.1015	12.4857	12.3826	12.6581	12.6923	11.2732	13.1735	11.6475	5.75691	4.9488	6.18632	4.18243	10.9216	10.8365	9.11944	7.93322	10.8886	11.5501	7.85753	5.41135	6.50239	8.91432	4.64486	8.3263	10.7797	5.72184	8.19015	6.50313	8.5578
ADH7	3.21196	3.86973	17.9856	2.27052e-37	9.15414e-35	74.4979	UP	6.35032	5.78681	5.99228	8.71892	7.6808	5.70512	7.09273	7.35897	7.53494	7.33083	6.42854	5.64409	5.95816	6.69677	7.71802	7.58403	6.18864	5.48309	5.96443	6.70929	4.05767	3.11977	3.24188	3.20707	3.14439	3.12988	4.8358	3.16797	3.00629	6.10558	4.47728	3.14706	3.04359	2.50487	2.95592	2.92476	3.14172	2.86247	3.26041	3.3316	3.0631	3.82197
ADIPOQ	-1.29716	3.83563	-3.3585	0.00102355	0.00199245	-1.97102	DOWN	2.6625	2.75947	2.79662	2.67098	2.77607	2.9299	2.74862	2.98346	2.6531	2.61922	2.79751	2.95581	2.68957	2.71984	2.74826	2.68517	2.70711	2.70954	2.71687	2.54847	2.76336	6.81612	3.36208	2.96372	2.64149	3.25546	6.15007	3.65327	3.19969	3.04312	4.66383	3.12591	6.56868	3.60444	3.26133	5.03559	4.49628	3.95445	3.28366	2.87775	9.95041	4.03129
ADIPOR2	1.30739	8.802	13.6426	5.12943e-27	3.82699e-25	50.8225	UP	9.54545	9.58475	9.4635	10.5107	10.0025	9.66974	10.0035	10.0058	10.1445	9.90166	9.77425	9.65776	9.66312	10.2607	10.1397	10.0614	10.0249	9.38846	10.0614	10.4709	9.59468	8.40847	8.67421	9.41183	8.56783	8.29779	9.28297	8.3236	8.23184	9.2626	9.31555	8.29381	8.93711	8.72795	8.81726	8.33552	7.71052	8.71479	8.83147	8.70422	8.49012	8.86906
ADRB2	1.92747	6.41566	10.6299	1.82663e-19	4.03533e-18	33.5532	UP	7.60883	7.56839	7.95322	8.17583	8.09933	8.63418	8.35461	8.26692	7.95744	8.20866	8.29807	8.07813	8.13585	8.34318	8.93228	8.23672	8.35532	7.90001	6.84493	8.85209	5.96227	5.58944	6.09991	5.31291	5.01055	5.59679	7.06449	6.26113	7.16096	6.74466	6.99478	6.37212	5.54861	4.50779	6.06168	5.00536	7.4397	6.51899	7.14077	5.54675	7.47619	5.88425
ADTRP	2.94977	6.54544	9.39402	2.23035e-16	3.08236e-15	26.5059	UP	8.85902	9.0343	9.59144	8.96285	8.67376	8.98362	9.00629	9.70677	8.16643	9.20075	8.86982	9.01089	9.25026	8.90268	8.94266	8.57125	8.99155	9.24267	9.66478	9.04598	8.86683	5.04186	5.07253	7.82251	4.0815	5.05253	8.39566	6.3659	4.44721	8.60887	7.20266	4.59476	3.82647	5.40632	5.66245	5.74577	4.08953	6.11429	5.20642	6.8948	4.09851	6.84099
AEBP1	-1.69445	8.66614	-7.21272	3.78542e-11	2.37183e-10	14.6079	DOWN	7.23971	7.12033	7.44239	7.4925	6.92901	7.2573	7.0582	6.9272	6.99393	6.73626	7.09615	7.28402	7.54208	7.79324	7.05985	7.53983	7.10724	7.85172	7.07855	7.18621	7.33068	9.33791	10.1275	9.27723	9.15435	10.4258	8.53941	9.17835	9.89415	8.30873	8.02735	10.8256	11.0882	8.96904	9.7376	9.62028	10.5157	9.38201	8.8169	7.56116	9.62678	7.97874
AGO2	-2.16303	8.16382	-23.4855	4.5669e-49	7.97876e-46	101.157	DOWN	6.65104	6.23748	6.25944	6.33224	5.85564	6.2116	6.86473	5.97749	6.18672	6.09534	6.65407	6.10424	6.33587	6.72385	6.40366	6.09733	7.06726	6.84108	6.80412	5.48587	6.0539	8.19487	8.35198	8.05459	9.15728	8.77717	7.96623	8.36455	8.62623	8.33778	8.53288	8.59343	8.41234	8.74209	8.3911	8.58165	8.79764	8.97324	7.96011	8.69465	8.13209	9.27467
AGR2	2.10269	11.2185	5.58941	1.24682e-07	4.57706e-07	6.67038	UP	13.019	13.1436	13.1719	12.7025	12.7563	12.9899	13.2554	13.3199	12.9511	13.2457	13.2443	12.9788	12.7608	13.0807	13.3665	12.9617	12.928	12.995	12.5186	12.8816	12.4491	10.9617	7.44739	12.4581	9.99628	10.3668	12.2586	10.8181	11.2887	12.0544	12.9646	8.81214	10.5287	8.82429	11.4951	11.0887	8.41372	11.6998	11.3134	9.43948	4.5136	11.4922
AGR3	2.57257	9.51518	4.9561	2.15723e-06	6.55613e-06	3.90303	UP	11.7901	11.7326	11.6193	11.3637	10.6847	11.7593	12.1034	11.9104	11.1144	11.8994	12.0006	11.8758	11.9106	11.2651	12.1006	11.3729	11.9254	11.3011	12.0234	11.404	12.0913	10.9571	3.21608	11.5571	5.00753	8.89904	9.2415	10.1114	10.797	9.86926	11.6727	7.55458	10.0872	4.42724	9.56516	6.87368	6.44308	10.7894	8.46881	6.75334	2.49861	7.28814
AGTR1	-1.53863	4.82215	-5.77725	5.15557e-08	2.01238e-07	7.53125	DOWN	3.46808	3.3114	3.45703	3.80422	3.71275	3.67307	3.49527	3.41024	3.63927	3.39151	3.67245	3.28102	3.51217	3.62125	3.5967	3.42651	3.63005	3.48031	3.42498	3.74268	3.34335	5.51369	6.32147	4.03173	4.37791	5.16826	4.29491	5.59588	6.73873	3.99731	3.9271	5.96487	5.73234	8.96476	5.19537	5.25096	5.23289	6.26627	6.42867	3.79434	7.30928	4.20173
AHCYL2	1.05889	7.16287	4.97376	1.998e-06	6.11057e-06	3.97719	UP	8.76097	8.19023	7.93586	7.75288	7.8804	7.86297	8.36395	8.02537	7.88	7.86686	7.46169	8.16737	8.07663	7.45281	7.88954	7.6482	8.26517	7.66896	9.2375	7.63306	9.09898	6.66174	6.12033	9.48049	5.95938	7.03892	7.60675	6.55042	6.79268	8.15151	8.33245	6.50022	5.87916	6.44167	8.4071	6.2859	6.12962	6.6626	5.98514	6.32906	5.96045	7.54017
AHNAK2	-1.62176	5.85929	-7.70194	2.77446e-12	2.05318e-11	17.1832	DOWN	4.15823	4.42075	4.54267	4.59156	5.01116	4.30875	4.72281	4.45854	4.46274	4.16174	4.19444	4.60033	4.38394	5.43451	4.59686	4.88297	4.39992	4.3464	3.62458	4.55505	4.54827	5.92977	7.38348	5.83586	7.903	6.23042	5.68894	6.85159	7.43035	5.74788	5.66334	6.71632	5.98404	6.07997	6.70999	6.19702	8.10073	6.80267	6.98849	5.563	7.3528	6.66161
AIM1	1.24497	8.46532	5.9218	2.58501e-08	1.05994e-07	8.20519	UP	10.1416	9.7443	9.6484	8.76508	8.22654	9.69216	9.96902	9.42581	8.78462	9.91082	9.42216	9.77634	9.75765	9.77977	8.82474	8.96964	9.55627	9.49268	10.2105	9.15738	10.5011	8.14316	8.13042	9.56253	8.35931	7.83771	8.3635	7.99267	6.81906	9.07866	9.50355	7.86099	7.72286	7.70645	7.74117	7.18255	5.6428	8.08231	7.54527	7.87401	7.28266	7.10135
AIM2	-1.13323	5.68866	-3.7976	0.000221604	0.000483547	-0.53368	DOWN	4.79208	5.34993	6.36538	4.01839	4.45547	5.10653	4.88858	4.53867	4.58598	4.14055	3.82348	5.62809	5.61948	3.69068	3.63182	5.56857	5.05467	5.96773	4.57448	3.99753	3.65194	6.33424	6.18219	4.77023	8.80034	5.59739	5.62798	5.16744	5.74827	4.66915	4.9337	7.09001	5.71901	4.77422	4.69612	5.27758	4.10872	4.81887	7.4482	4.61522	5.03323	4.3365
AKR1B10	4.08655	9.73569	6.36358	2.96799e-09	1.40842e-08	10.323	UP	13.2193	13.3683	13.108	13.1826	12.8433	13.0728	13.4413	13.2023	13.0741	13.5102	13.2018	13.0597	13.153	12.9851	13.5785	13.0417	13.3156	12.8877	13.3106	12.9774	13.0809	9.04942	3.96541	11.7953	4.72154	6.49585	13.1067	8.59572	7.37883	12.3429	12.6572	8.43291	4.55017	3.76044	10.0702	6.30643	7.04205	11.0574	4.98149	11.0017	3.44062	11.4066
AKR1C1	1.52279	6.53774	11.5436	9.16463e-22	2.91671e-20	38.8092	UP	7.57666	7.35296	7.92719	8.5056	7.86589	7.74016	8.01638	7.98019	7.90651	7.98292	7.92093	6.72254	8.0046	7.96475	7.94908	7.66656	7.68999	7.87953	7.86327	7.86837	7.79967	5.45369	6.57048	6.37061	5.18165	6.00108	7.42082	6.12636	6.13479	7.65784	6.8007	6.10657	5.23554	5.53135	6.2936	5.53056	6.07845	6.46812	6.4886	5.93749	6.75068	6.48399
AKR1C3	2.4893	10.6163	8.03094	4.62652e-13	3.86434e-12	18.951	UP	12.7226	12.295	12.7277	12.9472	12.5539	12.4864	12.6734	12.7574	12.8762	12.881	12.7749	12.3061	12.7636	12.7631	12.8293	12.6089	12.6237	12.7904	12.7432	12.7964	12.98	7.74787	10.6965	11.8672	8.85679	9.54894	12.2444	9.61151	9.05523	12.2774	11.4633	9.758	8.2565	10.0257	10.8187	7.9288	7.14736	11.3976	9.86619	11.1323	8.78831	10.2043
AKR1C4	1.12408	3.79122	6.72831	4.69683e-10	2.51582e-09	12.1316	UP	4.74807	4.44598	4.85872	4.61741	3.84922	4.6498	4.99448	5.32019	4.54353	5.40648	4.81328	4.14105	4.96486	4.49021	4.88015	4.41363	4.95509	4.6815	4.88649	4.79055	5.01504	2.83396	3.56028	4.09934	3.04332	3.08855	3.52173	3.47864	3.0197	4.23871	3.67704	3.39207	3.66734	3.0689	3.73644	2.77424	3.53576	4.52331	4.72832	3.48627	3.19173	3.01693
AKR7A3	1.99769	8.66495	8.39959	6.04743e-14	5.70587e-13	20.9613	UP	10.1225	10.1838	9.9885	10.4887	11.1995	10.007	10.3693	10.5466	10.3509	10.4385	10.4168	10.3939	10.4554	10.0299	10.5672	10.4111	10.345	9.81477	10.6031	10.0634	10.4455	7.69967	6.73864	8.97157	7.20109	7.60062	10.0803	7.9867	8.16248	9.48633	10.0942	7.83546	7.33188	6.9199	8.63638	8.07837	7.83159	9.04641	7.35173	9.56023	6.85341	10.1271
AKT1S1	-1.12025	6.01761	-14.9102	3.97821e-30	5.02428e-28	57.9381	DOWN	5.39102	5.20452	4.9065	5.03099	4.78979	5.07309	5.19689	4.91079	4.8812	5.14894	5.17512	4.45317	5.2067	5.08421	5.14368	4.9596	5.12721	5.28898	5.2654	5.06522	5.28424	5.86681	5.77234	6.45901	6.2956	6.22478	6.07814	6.24015	7.51831	6.34818	7.23573	6.07068	6.27001	6.43824	5.9403	6.40343	7.53405	6.80207	6.44518	6.09178	6.1701	6.31381
ALDH1A1	1.64461	10.3291	5.69879	7.47003e-08	2.83661e-07	7.16958	UP	11.5534	11.2441	11.1518	12.041	12.6088	11.2222	11.8008	11.9627	12.2995	11.9913	11.7259	11.9241	11.6474	11.4607	11.8505	12.0051	11.6007	11.4824	10.7692	12.019	11.5922	8.69254	8.68	10.2147	6.75814	9.64813	11.7556	8.61386	8.06381	11.5463	11.3394	8.86624	10.5623	11.0197	11.4758	10.6032	6.84505	10.8732	8.82416	7.90681	8.79086	11.6881
ALDH1B1	-1.16083	6.31363	-6.7052	5.28636e-10	2.80934e-09	12.0155	DOWN	5.594	5.57333	5.12968	5.17669	4.97449	5.19174	5.45512	5.39499	5.13014	5.14261	5.27188	5.42226	5.46183	5.33891	5.32146	5.46118	5.24448	5.1553	5.36754	5.43349	5.84576	7.07164	7.12979	6.96894	6.40735	7.2987	6.09015	7.31837	8.21313	6.32524	5.99588	7.21121	6.80835	6.2715	6.86061	7.21454	8.3385	7.23272	7.8296	7.83676	8.16508	5.41147
ALDH2	1.28089	10.1951	11.166	8.18226e-21	2.22492e-19	36.6356	UP	11.1903	11.3953	11.5151	11.3587	10.8848	11.2819	11.2373	11.4359	11.175	11.548	11.3575	11.2215	11.1788	11.0798	11.4057	11.1658	11.0785	11.4281	11.2624	11.3521	11.1634	9.81766	10.0527	10.4091	8.98941	9.96427	10.9877	10.1931	10.1972	10.7012	10.7088	9.96016	9.47886	9.89309	10.4603	10.2139	9.39959	10.2028	10.2066	9.82142	9.46221	10.381
ALDH3A1	2.6248	7.42802	7.4408	1.12847e-11	7.63915e-11	15.8	UP	9.2092	9.64028	9.50716	10.3107	10.1457	9.9793	10.0615	9.99465	10.5937	10.473	10.1066	9.68813	9.04831	9.51337	9.92057	9.38625	9.96618	10.0985	7.6804	10.016	7.0006	4.96552	4.72764	6.01602	5.64265	6.81267	10.9182	6.33856	5.74867	9.9313	9.53686	6.27768	5.03276	6.11955	7.43465	5.77845	7.10029	7.18616	5.23131	6.88411	4.93687	8.88829
ALDH3A2	1.86809	8.4729	14.3853	7.58947e-29	7.57682e-27	55.0088	UP	9.74411	9.68312	10.1571	9.91952	9.93418	10.1632	10.3768	10.143	10.4807	10.3091	10.493	9.95296	9.86885	10.1467	10.3173	9.96308	10.1832	10.259	9.30729	10.3724	9.14508	7.47213	7.62535	8.07076	7.89143	8.13565	8.68125	8.55393	7.44155	8.74234	9.5708	7.77894	7.12868	7.99469	8.01654	7.60601	7.04251	8.14675	7.99871	8.45069	7.94539	7.88213
ALDOC	1.8756	7.09109	14.1967	2.20388e-28	2.01766e-26	53.9496	UP	7.93716	8.71906	8.61029	9.11581	8.17804	9.08868	8.71322	8.70294	8.78619	9.29556	9.49477	8.66696	8.70376	8.35933	9.38121	8.62097	8.15189	8.09679	8.61378	8.85235	7.94541	6.76272	6.70285	6.42147	7.42326	6.14841	6.9012	6.67668	7.06585	6.40294	7.03192	6.75615	6.54728	5.83645	7.07917	6.67929	7.39985	6.80676	6.89403	7.74202	6.89536	6.9077
AMFR	1.07584	6.29177	6.72509	4.77482e-10	2.55367e-09	12.1155	UP	7.39316	7.07179	6.99966	7.10749	7.10023	6.84553	7.33952	7.49641	7.10095	7.40617	6.81714	7.54469	7.01065	6.58114	7.29049	6.76396	7.12698	7.37109	7.86032	6.73629	8.16197	7.0659	6.79824	6.74602	6.75872	6.47427	5.63781	6.59224	6.26307	6.76042	5.82042	6.82899	6.67903	5.96552	5.90305	6.24834	7.30112	6.74684	5.98457	6.30726	6.63872	6.79046
AMIGO2	-1.81092	7.80984	-7.75949	2.03184e-12	1.54619e-11	17.4905	DOWN	6.30665	6.12383	6.37167	6.42835	6.38643	6.02085	5.78861	5.3543	6.9995	6.2443	6.87918	6.74223	6.4145	6.90779	6.19207	6.79863	5.80989	6.34884	5.01874	6.78063	6.11034	7.96699	8.29268	6.31701	8.21044	8.39779	7.17647	8.0524	8.62072	7.64208	7.14951	8.41695	8.79161	8.47567	7.892	8.77459	6.67528	8.522	8.33539	7.45128	8.80433	6.52685
AMPD1	2.86978	5.22235	14.0015	6.65845e-28	5.65159e-26	52.8511	UP	8.67864	7.55592	7.82588	6.25041	8.16318	6.75704	7.43262	7.60816	7.59725	7.8882	7.87927	6.85201	7.26811	8.0124	7.86177	8.24649	6.74799	7.93455	7.6677	7.9099	8.20953	4.30623	4.12163	4.31597	3.813	4.24874	5.40209	5.15063	3.74361	4.87647	6.05018	4.40546	4.49884	3.5821	4.53136	3.91075	4.72101	5.16221	5.16782	4.00781	3.79271	4.42614
ANAPC2	-1.44226	6.62396	-18.6884	5.8817e-39	3.245e-36	78.1213	DOWN	5.25631	5.39453	5.42809	5.37565	5.07791	5.76729	5.31848	5.62229	4.95647	5.78981	5.52062	5.14987	5.58914	5.06368	5.30973	5.50186	5.47499	5.74295	5.39445	5.62862	5.27137	7.29168	7.21572	6.40744	7.38808	7.14834	6.56775	7.27424	7.48257	7.07712	6.87877	6.94016	7.66702	7.43873	6.90371	6.84594	7.89557	6.84613	6.79485	7.4007	6.84962	6.68266
ANG	2.50004	8.2268	11.0404	1.69476e-20	4.35426e-19	35.9128	UP	9.71566	10.155	10.4029	10.3276	10.1334	10.5566	10.4492	10.5812	10.2091	10.8555	10.7563	10.9015	10.2113	10.4464	10.729	10.3539	10.2112	9.99108	9.75463	10.5714	9.59829	6.97686	6.97019	8.91745	6.41612	7.021	8.92422	7.35762	7.49423	8.97481	9.4871	7.21014	7.40615	8.68679	8.54683	8.00963	6.65158	7.50448	8.62083	8.2181	6.1359	7.19375
ANGPT2	-1.29074	4.69411	-10.0987	3.92495e-18	7.14914e-17	30.5103	DOWN	3.50005	3.39825	3.67142	3.6945	3.70549	3.52686	3.77394	3.65858	3.59285	3.58101	3.58281	3.49319	3.67849	3.61619	3.50955	3.61148	3.55228	3.75471	3.5342	3.60855	3.73849	4.70837	4.68413	4.46699	4.80267	4.67634	4.73436	5.50682	4.18991	4.30765	3.85696	5.50848	5.24181	5.11799	6.73963	5.6526	4.16043	4.66532	4.58562	4.93925	5.41925	4.14348
ANGPTL1	-1.50024	5.18319	-4.86466	3.20008e-06	9.46259e-06	3.52193	DOWN	3.41275	3.84237	4.11232	4.26487	4.3505	3.60223	4.30786	4.05661	3.6627	3.98404	4.17848	4.08651	4.04565	4.7125	3.66927	4.07989	3.69772	3.2263	3.38452	3.79237	3.8848	5.05706	7.0812	3.6317	4.17222	5.43295	4.45422	6.73097	7.16071	3.7953	4.80321	7.1884	5.20304	4.10351	5.75541	5.10825	5.38854	6.84438	7.85075	3.83626	8.20976	4.03302
ANGPTL2	-1.89817	6.88682	-8.95811	2.64574e-15	3.09531e-14	24.0567	DOWN	5.46993	5.53172	5.35359	4.93991	4.99207	5.48197	5.45393	5.23048	5.21852	5.17388	5.17707	5.14049	5.22831	5.05566	5.1746	5.34377	5.20418	5.54075	5.5893	5.3536	5.44951	6.61816	8.65515	6.96837	7.53864	7.74352	6.79551	8.12596	8.46264	6.57794	6.3377	8.28075	7.80039	6.48586	8.12846	7.69358	9.15408	8.05289	8.06418	6.0107	8.7344	5.99596
ANKRD22	1.82517	7.87239	6.9601	1.42072e-10	8.2212e-10	13.3067	UP	9.23645	9.41998	9.24538	9.42884	9.98009	9.43088	9.43249	9.49472	10.0418	9.56709	9.62	9.51302	8.674	8.78667	9.42662	9.72525	9.55536	9.45367	9.15236	9.67444	8.6919	7.72869	5.80371	8.11185	9.89135	6.8769	9.02298	6.80212	6.52277	9.01774	9.2229	7.26809	7.27984	6.05103	8.35869	5.05712	5.74276	7.64776	7.35109	6.00602	4.76212	8.31896
ANKRD29	1.3824	5.77685	6.1612	8.07906e-09	3.59536e-08	9.34232	UP	6.07668	6.47673	6.70391	7.67457	7.94495	7.17546	7.21208	7.57685	7.11645	7.20125	7.47751	7.63057	6.74376	7.38515	7.45357	7.21447	7.02574	6.29928	5.48918	7.50725	4.34041	5.90944	5.54611	3.9504	4.31443	6.03484	6.20564	5.3603	6.13262	5.43579	5.75392	6.49443	5.652	7.46655	4.50808	4.9213	5.27242	6.84379	6.46755	4.56899	6.36553	5.02196
ANKRD36BP2	1.24432	4.57181	6.8857	2.08951e-10	1.18268e-09	12.9274	UP	6.08088	5.62991	6.3427	5.64293	5.03848	5.64991	5.59625	4.98203	5.46189	5.47521	5.88126	5.55194	5.65122	5.45742	5.18786	5.7371	5.57537	6.26218	5.51873	5.64656	5.61168	3.90591	3.97649	4.33918	4.0203	3.9301	5.3284	3.74842	3.00059	4.26367	4.67323	4.72321	3.90222	3.47612	3.84322	3.4069	3.34644	4.9294	3.42098	3.40174	3.3367	4.21072
ANO5	1.27044	5.48979	6.49692	1.52128e-09	7.55594e-09	10.9782	UP	6.23952	6.22297	5.94348	6.9017	7.05251	6.21663	6.22478	6.62648	6.96655	6.62382	7.18007	6.24401	6.68736	6.64532	6.58421	6.49457	6.65076	5.93279	6.72181	6.77219	6.78879	5.54602	5.90735	3.50984	4.15578	5.25898	5.43235	5.28149	4.79691	5.22085	5.99298	6.14267	4.56983	5.80396	5.39971	5.46991	4.38366	6.16031	6.46237	4.15739	5.68809	4.85358
ANXA10	3.63072	9.90568	5.52698	1.66605e-07	5.9943e-07	6.38815	UP	13.0609	13.2192	12.9265	12.8024	12.7523	12.9581	13.0707	13.0645	12.8114	13.0204	12.8133	12.971	12.6184	12.8835	13.1229	12.9346	13.0526	12.6757	13.2575	12.9914	13.1271	4.39342	3.99206	11.6	4.10898	10.4328	12.2733	8.89629	9.73596	12.2713	12.5027	11.2408	3.54642	8.12538	9.72882	6.4493	7.57707	11.2055	4.1172	9.15316	4.04872	11.5032
ANXA3	1.49883	9.07853	6.22977	5.7649e-09	2.61661e-08	9.67267	UP	10.3073	10.5344	10.5002	10.0975	10.178	10.2954	10.6121	10.5842	10.3873	10.6492	10.2902	10.2193	9.81143	10.3108	10.6698	10.2608	10.1958	10.1143	10.3353	10.5769	10.1867	8.03491	7.69951	9.31738	10.4442	8.52285	9.61981	8.77973	8.73104	10.0088	10.3254	8.15246	6.96239	8.54585	9.29899	8.86578	6.06979	8.76326	7.46448	8.84075	6.61028	10.9095
AOC3	-1.11323	7.72339	-3.32921	0.00112812	0.00217882	-2.06167	DOWN	6.44191	6.18013	6.97835	7.1337	6.87597	6.5539	6.88294	6.28574	6.61946	6.66913	6.84983	6.81145	6.92731	7.75225	6.80699	7.30432	6.25355	6.95499	6.40884	7.13915	6.70276	8.67833	9.09722	6.55519	6.57777	8.63546	8.08729	9.81932	9.81322	6.56543	7.15742	9.94856	8.54165	6.63704	8.52917	7.75714	10.6401	9.67532	9.59674	5.92563	10.2577	6.85468
AOX1	-1.22993	5.67152	-6.57209	1.04066e-09	5.29549e-09	11.3507	DOWN	4.42156	4.58539	4.47218	4.62118	4.62088	4.67537	4.75063	4.68622	4.75024	4.58642	4.68765	4.51911	4.49734	4.98602	4.68825	4.75403	4.53726	4.59132	4.54314	4.97669	4.43148	5.88247	7.35154	5.14374	5.09305	6.42114	6.41866	6.16816	6.19815	5.07885	5.47108	7.05912	6.81737	6.27966	5.71104	6.0488	5.85556	6.42171	6.62593	4.75669	7.8957	5.38626
AP2M1	-1.91991	9.95117	-27.9915	1.76423e-57	7.39743e-54	120.229	DOWN	8.65839	8.43519	8.43917	7.59228	7.68488	8.36434	8.52379	8.31153	7.56758	8.34173	8.59433	8.19958	8.26315	8.25807	8.46399	8.35986	8.52876	8.80434	8.5856	8.4101	8.68402	10.0933	10.5918	10.266	10.2632	10.3836	9.83929	10.4288	10.9741	9.9524	10.003	10.4777	10.269	10.3493	10.4102	10.2276	10.8961	10.4915	10.6678	10.8591	10.5795	9.69837
APITD1	1.00163	6.56879	7.09868	6.89398e-11	4.16671e-10	14.0179	UP	7.64355	7.81264	7.04712	6.64848	7.20293	7.11159	7.60735	7.79097	7.33626	7.82874	7.36773	7.62787	7.71574	6.79374	7.79933	7.26093	7.57705	7.3953	7.08626	7.03615	7.94272	5.36531	5.58236	6.17335	7.18728	6.22587	5.80079	6.39218	6.18706	6.77412	6.85596	5.99597	5.75518	5.75361	6.25425	5.99815	4.65972	6.98522	6.85094	7.31822	5.43864	5.87587
APOBEC1	3.68643	5.94607	11.3396	2.9912e-21	8.69771e-20	37.6347	UP	9.58042	9.65004	9.32054	8.22439	7.10336	9.31723	9.04737	9.64352	8.03986	9.10413	9.134	8.88308	9.87988	8.56596	9.00393	8.66358	9.04333	8.28052	10.417	9.19844	9.86579	5.57796	4.62993	8.50964	3.69946	4.9771	6.07667	4.47282	4.0669	7.76734	7.70659	5.2108	6.28196	4.92939	4.49528	5.15428	3.84953	5.33208	6.30014	7.43349	4.25535	4.25854
APOC1	-1.29387	8.57269	-6.22212	5.98677e-09	2.71027e-08	9.63569	DOWN	7.26242	7.22988	8.164	7.78914	7.70334	7.33438	7.27374	7.1933	7.44436	7.35706	7.18095	7.29212	7.13549	8.20119	7.46846	7.36974	7.23764	8.79485	7.21456	7.60665	6.92462	8.9609	9.65734	7.77303	9.81782	8.82742	8.69697	8.51824	8.59289	9.07589	7.4333	8.42255	9.26771	10.3476	8.56322	9.30231	7.57048	7.61621	10.747	8.62289	7.32407	7.29686
APOD	-3.80479	8.7035	-10.3603	8.68228e-19	1.73521e-17	32.0066	DOWN	5.27905	5.51989	5.40575	5.22307	5.96124	5.61077	4.9466	5.43485	6.01129	4.98379	4.87076	4.71411	6.17854	5.85984	5.05478	5.97665	6.15792	6.01204	5.09669	5.71179	5.57489	10.7087	10.4012	7.2026	8.90467	9.91822	9.96214	9.30992	10.5481	8.46199	8.31854	10.7816	10.8535	7.67712	10.763	10.6748	11.0063	9.95785	10.8872	10.225	10.8724	8.87864
APOE	-1.83392	8.36097	-8.82021	5.75549e-15	6.36077e-14	23.2876	DOWN	6.69654	6.84411	7.84831	6.77316	6.66979	6.85745	6.68857	6.64381	6.05503	6.66141	6.37355	6.70363	6.63257	7.53519	6.72512	6.77117	6.71415	8.00131	6.97883	6.4854	6.53589	9.02926	9.26005	7.43402	9.73707	9.33086	8.4145	8.29371	9.13474	8.67056	7.53803	8.73337	9.74076	10.6104	7.51853	9.04589	7.70255	7.65411	10.3519	8.35424	8.4982	6.37468
APOLD1	-1.455	8.48141	-13.358	2.60862e-26	1.75288e-24	49.2065	DOWN	7.12772	7.06755	7.41575	7.18968	7.38139	7.2594	7.30451	7.40983	7.43786	7.3353	7.19224	7.10011	7.27072	7.61623	6.97206	7.41753	7.2154	7.19939	7.06021	7.43585	7.0069	8.42647	8.84687	8.46875	8.18386	8.70392	8.8192	8.51021	7.99387	8.15638	8.09306	9.66646	8.98946	8.87297	8.92915	8.73162	7.879	8.78235	9.16165	8.27848	9.87895	9.11058
APTR	1.11235	5.59045	11.0783	1.36079e-20	3.54838e-19	36.1306	UP	6.12235	6.46068	5.97751	6.61064	6.55684	6.40223	6.52932	6.53576	6.7704	6.74477	6.94553	6.63817	6.68819	6.41307	6.9073	6.4427	6.59772	6.41161	6.22939	6.82215	6.23619	5.54916	4.90239	5.40286	4.83899	5.04609	5.37411	5.68393	5.11679	5.35526	5.60784	5.33355	5.30514	4.84725	5.57919	5.23377	4.60225	7.84806	5.15802	5.4366	5.11638	5.20071
AQP1	-3.3306	8.55506	-13.0335	1.67659e-25	1.00142e-23	47.358	DOWN	6.44207	6.30141	5.39961	5.74037	6.64005	4.97341	6.27791	5.15893	4.35129	4.52096	5.02294	5.29181	7.07476	5.46089	5.20735	6.08625	5.85451	5.81462	6.22262	5.6794	7.31979	8.95429	10.1663	9.08492	7.4326	10.104	8.95478	10.0649	10.3108	7.66314	7.89379	10.4058	8.91856	8.12965	10.1083	10.3169	11.2065	9.92219	10.1964	9.68304	10.3565	7.99957
AQP11	1.23283	5.32503	6.37853	2.75472e-09	1.31346e-08	10.396	UP	7.21626	7.60838	5.10917	5.55126	6.75837	5.37578	6.52109	5.95495	5.96007	6.33954	5.94421	5.94461	8.33886	5.24062	5.94937	6.10621	6.31023	5.18039	8.17092	5.80254	8.21327	4.3488	5.30599	5.64202	4.95444	4.54101	5.17677	6.4118	4.35829	5.62512	5.93966	4.25266	4.29725	5.61068	5.03595	5.07142	5.21172	5.27642	4.99933	7.74426	4.60641	5.17877
AQP9	-1.84801	6.59713	-7.31101	2.25096e-11	1.46285e-10	15.1198	DOWN	4.72031	4.83425	6.39658	5.25703	5.14488	4.95397	5.02524	4.85549	4.90394	4.7317	4.7181	4.68159	5.54806	4.72904	4.40342	5.30887	4.98012	5.8254	5.10669	4.6743	5.10648	5.80181	7.65714	7.51858	8.09487	6.82052	8.01646	5.95986	6.86482	7.01656	6.40205	7.37428	7.38468	6.06069	6.55172	7.73571	5.5773	5.62069	7.67417	5.89857	6.84998	5.78586
ARHGAP12	1.27246	7.65337	9.75321	2.86011e-17	4.50504e-16	28.5412	UP	8.55196	8.42136	8.89284	8.76717	8.54617	8.83232	8.83666	8.83169	8.70947	9.07615	8.90782	9.00149	8.49837	8.99547	8.93911	8.80203	8.6915	8.60756	8.34502	8.77035	8.16668	7.29742	6.90626	7.66213	7.27437	6.84096	7.4135	7.27513	6.38506	7.842	8.17112	7.12449	6.81649	7.252	7.49528	6.83488	4.82512	8.05652	6.48558	7.652	6.60731	6.36715
ARHGAP32	2.49471	5.85616	14.9409	3.35123e-30	4.28406e-28	58.1085	UP	8.1444	8.03258	7.62338	7.88484	7.52246	7.90949	8.021	8.06746	7.88577	8.2128	8.01105	7.77802	8.07262	7.70154	8.09241	7.70466	7.93304	7.69173	8.63755	7.95492	8.15197	6.12412	4.56646	6.16606	5.89523	4.89916	5.35999	4.88417	5.13567	6.52116	6.32561	4.60866	5.76435	4.52376	5.27905	5.21469	4.58479	5.06822	4.50109	4.99741	4.32513	4.76932
ARHGDIB	-1.60773	8.41333	-16.1623	3.92789e-33	7.99497e-31	64.8119	DOWN	7.22777	7.19651	7.81304	6.80606	6.96923	6.95525	6.83212	6.97108	7.05814	6.85179	6.49277	7.35103	7.27631	6.99826	6.70783	7.21986	6.95971	7.41919	7.25174	6.84406	7.08716	9.29116	8.8025	8.27024	8.43463	8.79686	8.87524	8.71155	8.87924	8.49893	8.17277	9.04866	8.99052	8.18047	8.43368	8.59721	8.61132	8.46164	9.17073	8.26571	8.88478	8.09521
ARHGEF28	1.24333	5.9143	9.75272	2.8681e-17	4.51425e-16	28.5384	UP	6.43284	6.18097	6.82214	7.27598	7.61166	7.23824	7.0635	7.4049	7.73433	7.21145	7.11685	7.28284	6.51927	7.28281	7.26024	7.49147	6.99719	7.09504	5.26374	7.56965	5.30127	6.17895	4.88416	5.3031	6.05259	5.40545	6.27327	5.52794	5.20111	6.35496	6.84545	5.43654	6.01886	5.54886	5.98403	5.88061	5.32739	5.75341	5.48837	5.24611	5.33849	5.94766
ARHGEF37	1.23733	5.83887	12.8652	4.40984e-25	2.47199e-23	46.3972	UP	6.54518	6.36075	6.77724	7.26924	7.27987	7.12528	6.75049	7.22557	7.11693	7.06934	6.94295	6.6463	6.78314	6.80083	7.22812	6.9869	6.62819	6.91973	6.36804	7.24405	6.39816	5.37501	5.67335	5.75618	5.40085	5.58453	6.14756	5.98876	5.79368	5.95215	6.33219	5.77459	5.4319	5.18583	5.9511	5.32507	6.31176	5.88992	5.83453	5.79262	5.78283	6.08129
ARL14	2.97979	8.33189	7.10696	6.60101e-11	3.99972e-10	14.0607	UP	11.1061	10.5982	10.4896	11.121	10.6646	10.7996	11.2766	10.9385	10.5423	10.2744	10.6404	10.689	10.6943	11.8911	10.9276	10.8902	10.7245	10.5568	10.935	11.2899	10.5403	6.94835	5.2131	7.52444	5.24487	6.91015	9.08104	5.72774	7.10323	10.2581	10.4053	7.29958	7.01629	10.4022	8.67431	7.99307	4.51276	8.49189	5.39614	4.91204	3.57726	9.58032
ARMT1	1.17098	7.93191	9.4378	1.73758e-16	2.44322e-15	26.7533	UP	8.94961	9.00051	9.04492	8.53178	8.49782	8.85033	9.01779	9.0293	8.77587	8.98841	8.91795	9.00106	9.02336	8.9893	9.06904	8.76191	9.13426	8.76219	9.18664	8.77593	8.94059	7.11461	6.93803	8.02122	7.53234	7.07382	7.65358	7.39633	7.31271	8.35695	8.06888	7.41966	7.15857	7.55146	7.42233	7.02944	4.74821	7.53378	7.88671	7.05612	7.31155	7.5864
ARPC1A	1.05975	10.1358	10.1351	3.18345e-18	5.93781e-17	30.7179	UP	11.0419	11.3031	10.888	10.8348	10.806	10.9474	11.3586	11.1935	10.8859	11.2205	11.1838	10.8904	10.9075	11.0578	11.2702	10.8934	11.1828	10.7809	11.1518	10.8663	10.9019	9.68498	9.84015	10.6222	10.0151	10.5465	10.2035	10.2319	10.039	10.3519	10.6658	9.6728	9.64106	9.35508	9.71723	10.8212	9.44273	10.947	9.81266	10.419	9.54951	10.0293
ARRB2	-1.4666	6.94044	-19.0867	7.62803e-40	4.84611e-37	80.1464	DOWN	5.83947	5.79668	6.02206	5.70988	6.47154	4.92556	5.54922	5.89715	5.64394	5.62223	5.06243	5.40049	5.86838	5.46765	5.67906	5.56129	5.69582	5.55744	6.04586	5.89851	6.13582	7.08559	7.48607	7.49187	6.9587	7.01421	7.68479	7.48128	7.73537	6.87133	6.87559	6.98089	7.17136	6.89464	6.39856	7.5023	7.79763	7.18269	7.72785	7.88774	6.8838	7.13972
ARSJ	1.31934	5.12556	10.1298	3.28065e-18	6.09742e-17	30.6881	UP	6.19582	5.75221	5.70051	5.51465	6.53921	5.71434	6.48032	6.53518	5.9439	6.31356	7.33357	7.17782	5.94451	6.32449	7.21503	5.53165	6.53988	5.99466	5.44504	6.57503	6.16376	4.95862	5.1312	4.42915	5.71099	4.63395	4.64246	5.64323	5.23943	4.56958	4.75629	5.12897	4.63949	4.49266	4.72221	4.75134	4.04537	4.86564	5.04073	4.24712	5.65835	5.5352
ARX	1.47542	4.54667	11.1803	7.53214e-21	2.05614e-19	36.7178	UP	6.03043	5.91566	5.28123	4.99858	4.96487	5.72553	5.73401	5.48718	5.99128	5.73553	6.11379	5.74925	5.96856	6.31395	5.64173	5.85186	5.6925	5.7374	5.91404	6.46245	6.22484	3.80734	4.14726	5.70891	5.11853	4.07966	4.05687	4.86118	5.97605	4.30553	5.32018	3.94891	4.56062	3.60648	4.19444	3.80174	4.46111	4.36139	4.06698	3.89351	3.78683	4.139
ASAP2	1.67953	8.52116	14.3381	9.90836e-29	9.61707e-27	54.7439	UP	9.85048	9.79748	9.91779	9.864	9.55073	9.9924	9.91832	10.1806	10.0162	10.3178	10.1013	10.0977	9.81302	10.0569	10.1941	9.98138	9.88249	9.82049	9.69644	10.1143	9.43939	8.37568	7.49178	8.38743	8.81538	8.29269	8.49758	8.08974	7.25528	8.61334	8.97188	8.03401	8.33611	8.22877	8.73038	8.64035	6.75855	8.62139	7.39658	7.73211	7.82366	8.89142
ASB2	-1.25783	5.82027	-4.9209	2.51229e-06	7.54696e-06	3.75573	DOWN	5.61577	4.71555	5.01616	4.79866	4.76406	4.58181	4.33795	4.39814	4.32693	4.46188	4.38296	5.11221	4.99861	4.64601	4.52068	4.77837	4.79624	4.97488	5.24971	4.50981	5.02709	6.35189	7.12262	4.82898	5.19167	6.99008	6.05094	7.31969	8.28691	4.89592	5.26532	7.22913	6.19726	4.84275	6.78871	5.92428	8.90877	7.17923	7.91503	4.90244	7.49864	4.78706
ASB5	-1.33958	3.62689	-4.08366	7.62647e-05	0.000179133	0.478681	DOWN	2.23746	2.45913	2.46737	2.57953	2.66799	2.49587	2.56578	2.52734	2.45833	2.53273	2.26142	2.60732	2.519	2.32691	2.5872	2.3923	2.50966	2.62807	2.43929	2.52711	2.71913	2.58991	5.03183	2.78113	2.43988	4.51231	3.22706	6.75448	5.22505	2.9633	2.53109	5.89105	2.9111	2.59023	2.81107	2.62534	3.28144	7.06887	6.31448	2.57657	6.44557	2.74858
ASB8	1.41757	7.11846	24.1071	2.75071e-50	5.76686e-47	103.93	UP	8.21875	8.24455	8.25068	8.31433	8.43477	8.22968	8.25654	8.427	8.28728	8.40798	8.22698	8.41017	8.21369	8.37919	8.41495	8.25406	8.21673	8.2102	8.31914	8.4667	8.33729	6.5727	6.56533	7.19481	6.37262	6.64113	7.13119	6.8887	6.95475	6.90199	7.22074	6.85462	6.89532	6.89746	6.91076	6.64811	5.94145	6.97417	7.29992	7.10947	6.81835	7.53515
ASCC2	1.23036	7.10081	14.1239	3.32696e-28	2.9184e-26	53.5405	UP	7.82432	7.98577	8.12772	8.13476	8.01075	8.20369	8.32917	8.42774	8.1199	8.30981	8.31842	7.97298	7.92722	8.19172	8.41375	8.12092	8.28058	8.04786	7.86755	8.32291	7.90632	6.7403	6.65094	7.2927	6.73455	6.93201	7.22499	6.9006	7.3796	7.41865	7.83823	6.61176	6.88381	7.26414	6.89187	6.92165	7.36142	7.34285	6.8085	7.18156	6.78995	6.84519
ASNA1	-1.24998	8.08004	-19.3158	2.37696e-40	1.71838e-37	81.3021	DOWN	7.25849	7.22078	6.908	6.74539	6.91884	6.83707	7.2124	7.08042	6.87304	7.06585	6.93836	7.00849	6.96827	6.9318	7.01786	6.90502	7.06121	7.09169	7.08431	7.08169	7.39826	8.09054	8.35889	8.46845	8.30183	8.54576	8.33993	8.25673	9.01245	8.23478	8.21924	8.22415	8.39778	7.95131	7.99294	8.32989	9.06798	7.98593	8.71609	9.06724	8.27869	8.48464
ASPHD2	2.37528	6.50549	11.5079	1.12733e-21	3.51703e-20	38.6036	UP	8.41634	8.72772	8.95387	8.26008	7.48452	8.94109	8.96478	8.88351	7.69539	8.50735	8.85404	9.34533	8.07491	8.96313	8.75216	7.99457	8.69146	8.40631	8.54022	8.36607	7.73782	5.49073	4.81856	6.81039	7.95048	5.85666	6.87591	4.95567	5.93599	6.94314	7.72047	5.42059	5.35207	4.71348	6.69499	5.47563	5.70523	6.152	5.71083	5.98034	4.69008	5.33263
ASPN	-2.52391	8.95114	-7.47459	9.4205e-12	6.46484e-11	15.9779	DOWN	6.75786	7.3719	7.21597	5.94812	6.61713	7.49081	7.34524	6.54347	6.75253	6.65752	7.16115	7.0514	6.26585	6.78404	7.14044	7.38831	6.03256	6.71216	5.73358	7.57175	6.86222	10.4103	9.78132	9.86864	9.56045	10.451	7.73164	10.0733	10.7544	8.00427	7.83618	10.6624	10.8708	9.29108	10.5015	10.8579	8.23374	9.64755	9.75657	7.23621	10.7257	9.25383
ASS1	-1.07904	9.55756	-4.93814	2.33179e-06	7.04308e-06	3.8278	DOWN	9.93286	9.41966	8.12228	8.06656	8.043	8.31195	8.93234	7.98671	8.28295	8.3199	8.17376	8.075	8.54456	7.88418	8.16557	8.66751	8.24038	8.79906	11.1247	8.21455	10.3463	8.65918	10.5731	10.8611	10.4769	10.4639	9.91549	10.2898	10.1005	11.6043	9.65905	8.97093	9.4382	9.93469	10.7012	10.0243	10.068	9.40296	11.7719	11.8621	9.10344	8.3079
ATF3	-1.00882	6.28127	-6.95362	1.46937e-10	8.48163e-10	13.2736	DOWN	5.83175	4.9518	5.65715	5.45078	5.09087	5.24435	5.36978	5.73944	5.17139	5.49816	5.03878	6.20867	5.75233	5.12959	5.27143	5.00013	5.5058	5.35734	6.08601	5.17823	5.558	6.24334	7.15418	5.25285	6.74214	6.46735	7.17731	6.26405	6.56399	5.66547	5.71165	7.23454	7.00558	6.27069	5.91098	5.79913	6.29375	6.61238	6.33172	6.79227	8.45899	6.28915
ATF7IP2	1.01899	7.17265	6.95998	1.4216e-10	8.22403e-10	13.3061	UP	7.91885	8.14506	8.08415	8.08419	8.49673	7.97938	7.97454	8.2072	7.99409	8.17427	7.90868	7.86132	7.89943	7.75815	8.08477	8.16115	8.1481	8.19151	8.03592	7.67661	7.83593	6.93993	5.85581	6.36649	6.39947	7.23501	7.10447	5.66901	6.55254	6.57385	7.36673	6.44397	6.17379	7.05497	7.12224	7.75045	5.95008	7.25734	6.75119	6.5452	5.82988	6.93354
ATP10B	1.14584	7.00119	4.62468	8.81006e-06	2.42118e-05	2.54558	UP	8.4714	7.78939	7.27547	7.97243	7.66554	7.74079	7.71254	8.17783	7.58423	7.97731	8.04904	7.89463	8.13741	7.69239	8.00546	7.75804	8.20343	7.15398	9.168	8.18231	8.64785	7.79814	6.5574	8.34893	7.4348	6.41262	6.78048	7.98636	6.27732	8.68767	7.37264	5.7682	6.64309	8.3329	7.34059	6.6441	6.59069	6.37346	6.70204	6.4285	5.31678	5.98258
ATP1A2	-1.35258	5.58269	-4.60484	9.56553e-06	2.60816e-05	2.46643	DOWN	4.37063	4.34566	4.60995	4.63198	4.60892	4.45329	4.28884	4.31922	4.51391	4.16405	4.3036	4.51563	4.47295	4.99262	4.35401	4.62168	4.13909	4.39755	4.23072	4.66893	4.34786	5.81565	6.01163	4.45797	4.31627	5.9893	5.22921	7.71928	8.0331	4.49275	5.20138	8.05543	5.90716	4.64443	5.24901	5.00257	8.67047	7.86241	7.98637	4.30352	8.19086	4.33362
ATP2B1	1.1355	7.59564	9.04263	1.64091e-15	1.97484e-14	24.5296	UP	8.95531	8.49943	8.00095	8.24799	7.8132	8.35094	8.83799	8.38565	8.37454	8.37316	8.7508	8.52892	8.58548	9.00054	8.6166	8.53398	8.61256	8.22629	9.42632	8.36964	9.07005	7.77304	6.83698	7.50111	6.7586	7.40012	7.03417	7.03438	6.43358	7.51694	7.93789	7.46502	7.39915	7.99077	7.35651	7.04538	4.91783	7.54829	7.13469	5.98382	7.70221	7.24477
ATP2B4	-1.1062	7.6462	-5.9544	2.20949e-08	9.15996e-08	8.35854	DOWN	6.46636	6.53185	7.16216	6.8951	6.39912	6.96924	6.68925	6.8396	6.78708	6.66176	6.68657	6.72994	6.60198	6.97574	6.93837	6.54391	6.63796	6.91855	6.51242	7.14823	5.94041	8.15335	8.6447	7.02516	7.06967	8.32079	7.52009	8.82315	8.73573	7.17932	7.05028	8.85495	7.54971	7.43324	8.4731	8.3621	8.51037	9.02501	8.75327	6.99289	9.57042	7.72429
ATP4A	3.3102	5.64176	5.88516	3.08198e-08	1.24665e-07	8.03345	UP	6.06771	8.19536	5.59576	12.185	12.7364	8.40915	5.37259	10.9791	11.152	9.31199	7.7097	10.1753	6.74003	8.15485	7.85301	11.3611	8.32496	7.38612	5.25763	9.74374	4.22051	3.81755	4.51595	4.01571	3.82476	3.78096	11.3553	4.84531	4.35674	8.14967	9.04277	3.62741	4.14489	3.8369	3.65389	3.54894	4.74046	4.72487	3.56457	7.89879	4.018	11.9992
ATP4B	1.48326	5.37625	5.54063	1.56397e-07	5.6532e-07	6.4497	UP	5.63132	6.6247	5.81434	8.42398	8.88089	6.61529	5.32736	7.70288	7.86671	6.96941	6.16018	7.00813	5.88492	6.35405	6.20283	7.69374	6.36695	6.2856	5.45012	7.1469	4.68405	4.48459	4.78891	4.74162	4.44156	4.49349	8.08614	5.44136	4.63806	6.76893	6.79474	4.56323	4.49602	4.48675	4.63473	5.13155	5.36269	5.13223	4.66751	6.69209	4.69019	8.42697
ATP7B	1.03546	5.25666	7.85017	1.24174e-12	9.74659e-12	17.9764	UP	6.64389	6.26656	5.99461	5.57569	5.63083	6.16399	6.04347	6.13122	5.84183	5.8828	6.16833	6.02916	6.04311	6.0815	6.21413	5.90393	6.599	5.85028	6.82248	5.98449	6.80374	5.3372	4.79967	6.49213	5.12477	5.23582	5.20317	5.04658	4.76676	5.44584	5.54177	4.56978	4.71728	5.50677	5.02699	4.49972	5.49164	4.93497	4.57922	6.00542	4.4927	4.53944
ATP8B1	1.84977	9.50126	10.8422	5.34545e-20	1.27349e-18	34.7726	UP	10.9453	10.8202	10.9518	11.3246	10.7611	11.2709	11.183	11.0979	11.1982	11.0757	11.2932	10.9989	10.9483	11.2995	11.3741	11.1032	10.9309	10.978	10.9528	11.0751	10.609	9.29512	8.35738	9.56993	7.69767	9.1437	9.91047	8.66358	7.94881	10.457	10.7763	8.82071	8.50642	9.28431	9.32668	9.1104	7.46749	8.99792	7.72487	8.86818	7.91022	9.38461
ATRN	1.12081	7.16005	9.17497	7.75238e-16	9.80861e-15	25.272	UP	8.34932	8.17827	7.56183	8.10836	8.5016	7.76726	8.00229	8.07953	8.09296	8.08743	7.90833	7.52743	8.62702	7.86495	8.00064	8.20257	8.10604	7.65938	8.49641	8.11907	8.91281	5.83505	6.28497	7.11889	6.5579	6.98494	7.56677	6.96086	6.48432	7.16683	7.39632	6.6808	6.83857	8.59846	7.10138	6.57583	6.2508	7.10138	6.88998	7.77866	6.52174	7.14317
ATXN7L3B	1.09782	7.96054	12.6637	1.40729e-24	7.41305e-23	45.2444	UP	8.35902	8.98538	8.78732	8.98221	9.26764	8.97265	9.08499	8.92319	9.21766	8.93127	9.07061	8.83646	8.52584	8.99204	9.04181	8.90114	9.02038	8.84704	8.39562	8.96639	8.44917	7.36466	7.44896	7.86951	8.02322	7.7978	8.48236	7.63816	8.27499	8.3141	8.40048	7.85545	7.57164	7.98848	8.04427	7.43421	8.006	7.96086	7.64813	7.1603	7.28327	8.04626
AXDND1	1.51674	3.48585	9.69925	3.8968e-17	5.99386e-16	28.2346	UP	5.44564	4.95564	4.76148	4.3223	3.98052	4.44925	5.31447	5.39002	4.15954	3.95137	4.33883	3.67619	5.08968	4.63462	5.18223	4.69163	4.15642	5.08907	5.5961	5.31213	5.49008	2.95604	2.68413	3.01542	2.76201	2.81026	3.56371	2.98929	3.75118	4.29019	4.53712	2.89319	2.58734	2.48524	2.58305	2.72677	3.20451	3.15524	3.08158	2.82275	2.72486	2.77864
AXL	-1.02336	7.09952	-8.07897	3.55473e-13	3.01232e-12	19.2112	DOWN	6.04559	6.25608	6.33163	6.41218	6.07993	6.31763	6.31997	6.12992	6.13443	6.01308	5.94547	6.29446	6.264	6.61067	6.18654	6.30322	5.8967	6.70683	6.43641	6.05708	6.27645	6.93398	7.92202	6.89806	7.95367	7.71139	6.63484	7.73768	7.97484	6.56008	6.95749	7.59544	7.74207	7.09533	7.16381	7.39312	8.7232	7.47837	8.07585	6.58094	8.37129	5.95665
B3GNT3	1.2251	7.69868	7.90498	9.21238e-13	7.38293e-12	18.271	UP	8.73099	8.37981	8.50761	8.44579	8.22062	8.85206	8.87451	9.00123	7.92696	8.79875	8.96175	8.95958	8.67825	9.02609	8.94432	8.59848	8.78066	8.57628	9.25838	8.86538	8.91906	6.48307	7.02331	8.32236	8.48601	7.17955	7.91537	7.4015	7.75101	8.12613	8.20674	6.53236	7.10414	7.43284	7.33769	7.38831	8.21665	7.45911	7.42742	8.53413	6.66842	7.34398
B4GALT4	1.70873	7.759	14.2279	1.84664e-28	1.72066e-26	54.1254	UP	8.67501	8.98575	9.61986	9.2348	8.84571	9.11925	9.27877	9.70502	9.05717	9.32088	9.62286	9.40924	9.06754	9.48593	9.48145	8.88568	9.38317	9.06585	8.79128	9.50643	8.57191	7.54897	7.04781	7.27553	7.17161	7.09551	7.76637	7.34292	7.22242	7.79064	8.16675	7.01383	8.18622	7.81641	7.71245	7.81635	6.04013	7.33064	7.21399	8.12812	7.18017	6.80742
BAG1	1.24628	7.94648	10.4432	5.37638e-19	1.10614e-17	32.4821	UP	8.95317	8.99471	8.59183	8.92077	8.89401	9.10478	9.10715	9.21261	8.94388	9.14662	9.13502	9.18025	8.70295	9.04062	9.07641	9.04722	8.92619	8.75904	8.78436	9.37134	8.99129	8.29518	6.95815	8.5388	7.92753	7.53878	8.09868	7.4771	8.46496	8.18872	8.70241	7.11278	7.48993	6.99666	7.78982	7.43059	7.43557	7.30661	8.45225	7.97272	7.03772	7.25734
BAG2	-1.39642	5.9083	-7.13933	5.56983e-11	3.40441e-10	14.2278	DOWN	4.82866	4.82039	4.56246	4.71191	4.99224	4.58452	4.94393	4.75291	4.67803	4.52418	4.82731	4.80123	4.65266	4.76424	4.54433	4.83431	4.68158	4.64662	4.38965	4.88148	4.9922	6.09384	7.0037	5.35082	5.07634	6.53692	5.67312	6.82828	6.61672	4.90677	4.97842	7.3224	5.60129	5.43428	6.25461	6.30331	5.83538	7.18414	6.98041	5.13995	8.08859	6.39558
BAIAP2L1	1.45591	7.74048	6.51415	1.3947e-09	6.96521e-09	11.0634	UP	9.06346	8.49496	9.10499	9.11808	8.94733	8.9201	8.85683	9.17072	8.8579	8.99077	9.00787	9.16366	8.84747	9.25001	8.94096	9.04487	9.09965	8.71072	9.15253	8.87252	8.64478	8.01379	6.77893	8.141	7.72576	8.23082	7.65124	7.80022	7.04567	8.62366	8.74378	6.35714	7.14533	7.55541	7.43279	8.4064	6.08792	8.87171	6.20606	8.0844	4.81494	7.04106
BANF1	-3.12621	9.5609	-49.7315	1.40579e-87	2.94723e-83	187.043	DOWN	7.02099	7.02869	6.73382	6.80573	6.69766	6.96677	6.85078	6.93862	6.94077	6.92132	7.06805	6.76301	6.94157	6.9512	6.98086	6.75855	7.1625	7.07227	6.90103	7.03524	7.0334	9.78281	9.96234	10.2131	10.3983	10.2794	9.69029	10.4031	10.5251	9.67323	10.1756	10.1657	9.95617	10.2768	10.0992	9.8662	10.3416	10.3269	10.6564	10.4501	10.0937	9.72966
BBS4	1.02776	6.35908	12.8493	4.8326e-25	2.70175e-23	46.3063	UP	7.09081	7.04748	7.25672	7.27406	7.71107	7.10589	7.10097	7.09703	7.64067	7.25266	7.4202	7.25583	7.04585	6.83538	7.46695	7.46132	7.30238	7.15716	7.01079	7.46548	6.6912	6.20483	6.00269	5.64264	6.03269	6.13736	6.13093	6.07816	6.07947	6.11296	6.18606	6.46857	6.94848	6.0915	5.89336	6.30786	5.77289	6.29532	6.3399	5.72294	6.3333	7.23292
BCAR3	2.09803	6.6904	16.7683	1.46759e-34	3.99585e-32	68.0756	UP	8.23617	8.27075	7.71003	8.53027	8.15152	8.59807	8.4819	8.78122	8.60712	8.60459	8.90874	8.93691	8.46347	8.6262	8.84667	8.45066	8.20008	7.78884	8.35028	8.8592	8.14502	6.59058	6.03036	6.53902	6.56186	5.71503	6.49594	6.00253	6.61873	6.90368	7.3206	6.03764	5.77244	6.29447	5.93846	5.77435	5.71802	6.55725	6.09357	6.48777	6.06199	5.27565
BCAS1	3.39304	7.27278	10.4181	6.21546e-19	1.26267e-17	32.3382	UP	9.80137	9.86618	10.0838	10.525	9.92813	10.3054	10.2491	10.4666	10.2953	10.6112	10.4239	10.4681	10.1504	10.1452	10.4289	10.4158	10.1017	9.67312	9.31815	10.4092	8.97974	7.83979	4.18782	7.04263	4.26822	4.96135	8.70795	5.47181	4.80713	8.37626	8.91501	5.11451	9.01882	5.52079	8.61734	7.57013	4.71717	7.77282	6.27707	6.07291	4.66686	6.98333
BCAT1	-1.49908	5.53408	-7.28496	2.58408e-11	1.66284e-10	14.9838	DOWN	3.81228	3.97272	4.33509	4.3235	4.44225	4.49254	4.39996	4.29158	4.34949	4.46289	4.35572	3.96657	4.0132	4.37776	4.49664	4.42907	4.10522	5.09167	3.76841	4.06821	4.18854	5.5767	6.24386	5.50347	7.0336	5.31154	4.89179	5.72927	5.18599	5.17887	4.757	5.88986	7.0093	6.48898	5.70947	6.72052	4.60579	5.52073	7.12681	5.14342	6.85374	4.77375
BCHE	-1.46707	4.85781	-3.42245	0.000825941	0.00163651	-1.7708	DOWN	4.06291	3.07827	3.1383	2.95862	3.25592	3.17871	3.33515	2.94411	3.13991	3.678	3.69635	3.46616	3.56317	5.02009	3.53577	3.86039	3.89265	3.07777	4.97289	3.63112	4.62064	5.53148	7.11961	2.82308	4.54583	4.65253	3.56755	5.41329	8.51349	3.20816	4.58252	5.60987	6.56236	5.16497	6.04205	5.82466	4.95829	5.77411	6.79578	2.82338	8.74872	10.1704
BCL2A1	-1.97413	6.52109	-6.44549	1.9702e-09	9.60362e-09	10.7246	DOWN	4.90359	4.86165	7.0607	3.0497	4.64237	5.08194	3.69488	4.35192	4.30593	3.77736	4.06213	6.23264	5.24004	5.43165	4.32495	4.95572	5.0653	6.39068	5.97476	4.65533	4.01839	6.51783	7.33805	6.92466	8.43177	6.66104	7.63724	5.62426	7.55354	7.52313	6.1437	7.37248	7.40708	6.48038	6.69648	7.33533	3.74517	5.86485	8.34585	5.048	6.74404	5.09514
BCL2L1	-1.18194	6.6848	-12.8238	5.59721e-25	3.10438e-23	46.1603	DOWN	6.02158	5.69291	5.76693	5.54358	5.62025	5.4215	5.58557	5.59047	5.61191	5.75195	5.55581	5.57201	5.62238	5.53383	5.53186	5.70452	5.66213	5.66603	6.4406	5.61316	5.99982	6.21006	6.2745	7.21765	7.87626	6.9157	6.60243	7.22817	7.08624	7.01737	7.23337	6.71253	6.3537	7.43002	6.40936	6.67215	7.25377	7.28042	6.91548	7.31996	6.28287	6.68967
BCL2L15	2.05901	6.60849	8.43639	4.92845e-14	4.70728e-13	21.1636	UP	8.61601	8.11614	8.16176	7.82284	7.64627	8.21718	8.62227	8.31922	8.28	8.58818	8.32319	8.57394	8.87794	8.19057	8.34759	7.93347	8.35311	8.14763	8.97065	8.43234	8.59826	6.5627	4.65528	6.501	6.24292	6.67486	7.19315	7.12802	5.21996	8.03452	7.23074	5.39779	6.08178	6.76222	7.44365	7.18658	5.26702	6.76723	4.91373	7.43075	3.84254	5.42127
BCL6	-1.60774	7.14531	-10.8226	5.9888e-20	1.41391e-18	34.6598	DOWN	5.5633	5.79766	6.50589	5.81261	5.81946	5.89806	5.68689	5.65954	5.80471	5.50928	5.68957	5.97642	5.56822	5.98424	5.57635	6.19288	5.67018	6.07338	5.64803	5.61595	5.60763	7.71265	8.76175	6.27847	7.38716	7.65384	7.3484	7.45512	7.47881	6.73252	6.24879	8.37759	7.97557	7.80732	8.28221	7.38526	7.18666	7.5514	7.52836	6.29022	8.74305	6.69916
BCO1	1.52202	4.14296	6.85964	2.39072e-10	1.33835e-09	12.7951	UP	5.67324	6.3652	5.05722	4.95704	4.5942	4.9662	4.50305	5.07483	5.02822	5.8952	4.85836	6.91183	7.49257	4.2298	5.17162	4.61195	5.05922	3.66531	7.55619	5.20419	7.00416	3.3806	3.03216	5.1197	3.65249	3.05704	3.89749	4.46846	3.36937	4.87209	4.10174	3.41233	4.28712	4.27154	5.24539	3.6206	3.78874	3.90205	4.36939	6.82748	3.01259	2.93502
BDH2	1.09166	6.70733	9.46938	1.45103e-16	2.07579e-15	26.9318	UP	7.32835	7.49738	7.06076	7.64594	8.01212	7.46902	7.32784	7.95747	7.6084	7.91046	7.891	7.53068	8.1565	7.5933	7.54069	7.65249	7.37435	7.41957	7.20612	8.17226	7.77695	6.22739	6.7899	6.26806	5.88902	6.74132	6.34957	6.13027	6.08607	6.40805	6.73729	7.20266	6.46154	6.41853	6.4844	5.55695	5.49991	7.07567	6.21216	5.32631	7.01316	7.3796
BDKRB1	-1.13866	4.76567	-9.14937	8.96409e-16	1.124e-14	25.1282	DOWN	3.91381	3.59042	3.54295	3.68157	3.58712	3.37702	3.88091	3.67957	3.56096	3.74457	3.70838	3.68475	4.07532	3.79494	4.22612	3.91762	3.91361	3.462	4.35178	3.71359	4.5642	5.1211	5.43668	5.15792	4.91511	5.32588	5.20403	5.32033	5.86387	5.14978	4.07206	5.01355	5.21249	4.54749	5.17665	5.08944	6.32123	6.1642	5.96901	4.09769	6.96167	5.36409
BEX5	1.93681	6.90689	8.61657	1.80397e-14	1.8494e-13	22.1574	UP	8.56426	8.69307	8.37528	8.95305	9.21517	8.41822	8.49892	8.70704	8.85782	8.70824	8.79397	8.34126	7.95751	8.60096	8.64845	8.75379	8.12008	8.41999	7.69503	8.81953	8.10543	5.47695	5.68348	6.4244	7.22241	6.09015	7.90953	6.21775	5.90071	7.47366	8.15826	6.3988	6.09109	7.0011	6.79718	6.18388	5.87331	7.1904	7.50794	7.17596	6.36217	7.28052
BGN	-2.80101	7.8728	-12.7966	6.54709e-25	3.57447e-23	46.0046	DOWN	5.597	5.23572	5.90232	5.59105	5.47554	5.38383	5.54493	5.10984	5.50641	5.47347	4.99336	5.39748	5.72293	5.63024	5.59	5.61436	5.63362	5.92675	5.65779	5.36204	5.51682	9.31824	9.17015	8.47523	8.83538	9.22394	8.1317	8.93647	8.90742	7.51082	6.51135	9.44347	10.4714	8.91767	9.15423	9.72351	9.67407	7.91935	8.12842	7.70671	9.04674	8.52281
BHLHE40	-1.42462	8.02027	-10.1554	2.83124e-18	5.30446e-17	30.8342	DOWN	6.72825	6.95936	6.68943	6.45828	6.65231	6.86322	6.5945	7.11633	6.44527	6.61873	6.79723	6.94176	7.10645	6.96705	6.98104	6.6696	7.07994	6.59034	7.28229	6.84049	6.88632	9.02888	8.16437	7.49891	9.56127	8.50362	8.59449	8.45388	8.02479	8.53027	7.83838	8.45556	8.95355	9.99399	9.12314	9.4326	7.92523	8.12641	7.47321	7.78052	9.80029	8.02358
BICC1	-1.20238	5.36216	-7.44326	1.1137e-11	7.55554e-11	15.813	DOWN	4.25643	4.444	4.38897	4.23172	4.41771	4.47658	4.23204	4.14915	4.22242	3.938	4.20229	4.27019	4.57261	4.40158	4.59471	4.49449	4.45799	4.8921	4.15112	4.39416	4.18413	5.81105	5.83441	5.97826	4.96694	5.88311	5.12018	5.1174	5.45372	4.86413	4.41736	6.61236	6.4238	5.48823	5.56913	5.52776	5.0943	5.86208	5.60114	3.9783	6.28256	5.40604
BICD1	-1.00552	5.26287	-10.4172	6.2495e-19	1.26835e-17	32.3328	DOWN	4.8949	4.48026	4.47382	3.85563	4.10167	4.32265	4.48093	4.20625	4.33489	4.31626	4.32792	4.46401	4.73292	4.31415	4.30183	4.49567	4.4691	4.69004	4.65123	4.34532	4.50428	5.26053	5.23908	5.21231	5.31359	5.49819	4.89608	5.3514	5.26333	4.70525	5.00874	6.01214	5.74869	5.63649	5.46828	5.00415	4.81558	5.46056	5.64263	4.4058	5.40503	5.34355
BICDL1	1.36011	6.03349	14.2282	1.84397e-28	1.72066e-26	54.1268	UP	6.88969	7.31792	7.45375	7.13591	6.90021	7.71515	7.44602	7.5973	6.9353	7.69616	7.67499	7.33866	6.92487	7.47638	7.65259	6.79016	7.22948	7.03377	6.42218	6.90579	6.18524	6.0164	5.57802	5.86533	5.64458	5.93762	6.02217	5.10403	5.65817	6.31054	6.51517	5.47554	6.16423	5.99494	6.01343	5.58091	5.4604	5.38261	5.76874	5.9873	5.52959	6.24506
BICDL2	1.14273	6.57716	7.53936	6.6593e-12	4.67556e-11	16.3198	UP	7.49726	7.60322	7.47611	7.35524	7.47226	7.66704	7.4838	7.75234	7.1043	7.49698	7.34023	7.57162	7.20046	7.64903	7.47477	7.30404	7.60732	7.59871	8.32609	7.53066	7.78828	6.6093	5.78082	6.80315	6.43426	6.612	7.10639	6.07245	6.17589	7.18042	7.22359	5.74302	5.58047	6.13955	7.21861	6.95082	6.19694	6.48574	5.35693	6.72787	4.49504	5.99104
BLNK	1.42982	8.45308	6.78108	3.58315e-10	1.95831e-09	12.3975	UP	9.70751	9.76782	9.64863	9.49559	9.41146	9.70087	9.52528	9.66186	9.56906	9.70719	9.82503	9.68111	9.70895	9.63972	9.70131	9.47514	9.74321	9.67408	9.80735	9.53508	9.77765	8.22462	6.22641	9.51291	7.79144	7.63486	8.75195	7.8877	8.17375	9.08367	9.34438	9.04642	7.81475	9.03774	7.68606	8.28465	6.2259	8.85098	7.91348	6.25759	5.78556	7.43694
BLVRB	1.42209	9.47162	12.3082	1.09529e-23	4.9171e-22	43.206	UP	10.4599	10.5845	10.7748	10.7412	10.4476	10.803	10.8293	10.799	10.7202	10.8441	10.8396	10.729	10.3824	10.7591	10.9891	10.5556	10.7411	10.8511	10.2265	10.9625	9.97758	8.84943	8.69538	9.21637	9.11337	9.0404	9.84477	9.12619	9.26022	10.0158	10.1766	9.0139	8.54453	9.07548	9.2744	9.50865	9.28362	10.1271	9.38532	9.84629	9.3784	9.17934
BMP2	1.96461	7.34897	11.1291	1.01344e-20	2.70661e-19	36.4232	UP	8.58936	8.71399	9.23701	9.28685	8.94913	9.16727	8.8641	9.07924	9.49965	9.25708	9.21304	8.90299	8.84968	9.09193	9.18255	9.25472	8.72022	9.10052	8.62801	9.17284	8.26139	6.93329	6.46195	6.24323	5.89725	6.46055	7.77546	6.52692	6.53789	8.05244	7.34682	6.72665	5.96172	8.73454	7.38608	7.79012	5.61678	7.36633	6.46665	8.93716	6.80422	6.38125
BMP4	1.36526	6.74698	10.1584	2.78345e-18	5.22427e-17	30.8511	UP	7.90128	8.0023	7.73094	7.7065	8.1506	8.11115	7.7441	7.63119	8.19377	7.62881	7.69412	7.5374	8.17415	7.88647	7.61586	8.28445	7.90538	8.17051	7.71736	7.88387	8.12568	5.94222	6.57745	6.75297	8.87662	6.46537	6.53697	6.22901	6.6149	6.32205	6.33357	7.00098	6.11435	5.78802	6.47753	6.28691	7.15899	5.9704	5.86075	6.00085	6.33675	6.18615
BMP5	1.40625	3.89056	13.093	1.19085e-25	7.25761e-24	47.6979	UP	5.9359	5.04408	4.98882	4.74429	4.93136	5.19258	5.0346	4.88778	5.37145	4.89853	5.04684	4.65276	4.86626	5.74577	4.74977	5.44983	4.53606	5.18701	4.90425	5.60984	4.75702	3.42186	3.44022	3.26386	3.34424	3.38752	3.53745	3.32977	3.39042	3.63617	4.03237	3.29727	3.2954	3.19145	3.22168	3.38982	3.3606	3.48555	3.57956	3.39743	3.74431	5.63732
BNC2	-1.67623	5.51583	-8.25258	1.36575e-13	1.2252e-12	20.1562	DOWN	4.04071	4.04442	4.18933	4.33732	4.26616	4.0528	4.09241	4.05917	4.10405	4.00558	3.8549	3.96128	4.12853	4.38092	3.80873	4.25054	4.12486	4.51788	3.80675	4.11112	4.09417	5.87753	6.57421	5.80259	5.08406	6.24039	5.37527	5.9223	5.82221	4.9978	4.69362	7.14358	6.55692	4.83821	6.1588	5.90021	6.20514	6.57252	6.28036	3.92291	6.88537	5.79842
BOC	-1.30377	7.00082	-7.38954	1.48305e-11	9.8799e-11	15.5308	DOWN	5.87761	5.63827	5.91245	5.75561	5.75431	6.02897	5.83941	5.87771	5.88662	5.8888	5.93388	5.77851	5.98913	6.17514	6.04512	5.88572	5.92313	5.81344	5.87866	6.0234	6.08793	7.98689	7.97605	6.51942	6.43321	8.1321	7.00096	7.83163	8.35451	6.44285	6.38035	8.13987	8.15871	6.79177	7.48068	7.85319	8.71356	7.51931	7.88057	5.94375	8.57735	7.0484
BPHL	1.13654	6.60311	13.2908	3.83137e-26	2.48683e-24	48.8246	UP	8.03366	7.49511	7.12718	7.0199	6.88875	7.71128	7.48531	7.58067	7.49078	7.73765	7.79111	6.82263	8.19474	7.47258	7.39736	7.35374	7.73854	7.30701	8.23521	7.71018	8.14225	6.09282	6.02023	6.73072	6.47907	6.13377	6.36411	6.33501	6.30113	6.65863	6.85056	6.1078	6.00195	6.80338	6.32011	6.09021	6.20829	6.77466	6.4666	7.38562	5.94072	6.15647
BRD1	1.08039	7.25212	15.7041	4.84887e-32	8.26476e-30	62.316	UP	8.14004	8.1479	8.10034	8.19454	8.17314	8.14374	7.95694	8.3142	8.07953	8.16184	8.45135	8.38448	8.13522	8.26054	8.26706	8.0379	8.11851	8.08433	7.9981	8.36276	7.86066	7.051	7.26333	6.89854	7.20105	6.97605	7.10842	7.33477	7.57734	7.12849	7.10965	7.01441	7.0237	6.88423	7.39848	7.15034	7.77393	7.43576	6.65007	7.22862	7.25793	6.72138
BRI3BP	1.21253	8.95764	6.02027	1.60679e-08	6.83155e-08	8.66984	UP	10.3136	10.1399	9.84445	9.26976	9.46331	9.68455	10.1585	9.99567	9.92483	9.82634	10.061	9.9278	10.3062	9.99836	10.2022	9.92832	10.1624	10.1135	10.0198	9.75163	10.4303	8.67243	7.86688	10.2691	9.35638	8.18422	8.82632	8.4038	7.62899	9.55766	9.2987	8.28371	8.41416	9.36345	9.06614	8.86641	5.90267	9.18172	8.28368	9.01924	5.78887	8.36559
BRSK1	-1.44311	5.49962	-16.7488	1.63008e-34	4.38135e-32	67.9713	DOWN	4.39173	4.15855	3.99828	4.31864	4.78968	3.85255	3.95477	4.04658	4.37511	4.59299	4.76912	4.21998	4.55936	3.16104	4.46985	3.44655	3.79895	4.70569	4.6857	4.97952	4.73343	6.01134	6.00412	6.32675	5.42187	5.331	5.80991	5.93045	5.44398	5.84823	5.49635	5.45183	5.14044	5.66888	5.46119	6.14971	5.99796	5.63949	5.53121	5.55617	5.49593	5.6751
BSG	-1.76991	9.32118	-16.19	3.37647e-33	7.00869e-31	64.9621	DOWN	7.76705	8.092	7.40456	7.33722	8.07842	7.68181	7.82799	7.76664	7.92589	8.05915	7.80431	8.09018	7.74113	7.28654	8.09314	7.97075	7.92267	7.80583	8.13353	7.44217	8.2588	9.11328	9.66083	10.1964	9.91423	9.64275	10.0465	9.8061	10.6321	10.1381	9.94092	9.59509	9.63713	9.37975	9.61889	9.16679	10.509	9.48066	9.84069	9.49549	9.63636	10.3511
BTBD2	-1.41247	6.71682	-16.6591	2.64583e-34	6.93374e-32	67.4905	DOWN	5.39224	5.51824	5.64268	5.55349	5.38008	5.68194	5.64385	5.47583	5.69256	5.47199	5.27489	5.651	5.90767	5.11681	5.7276	5.70348	5.55626	5.25415	5.48057	5.45552	5.52938	7.31934	6.55615	6.77991	7.657	7.36913	6.70795	7.27506	8.15621	7.12418	7.28634	7.31505	7.46856	7.39215	6.58343	6.88502	8.61392	7.06138	7.00143	7.46148	7.08833	6.93447
BTBD3	1.15298	8.30692	8.16011	2.27496e-13	1.97656e-12	19.6521	UP	9.12933	8.91376	8.91433	9.43828	9.84328	9.19989	9.24553	9.20309	9.65389	9.51051	9.68956	9.30473	8.93473	9.2705	9.53895	9.363	9.43504	8.90351	8.96721	9.37495	8.97195	7.22776	7.55492	8.2432	8.09069	8.51208	8.31513	7.98055	7.52847	8.00441	8.53885	8.17874	7.69651	8.76988	8.1694	7.91258	6.40313	8.31711	8.17342	7.1978	8.08903	9.11135
BTC	1.07451	5.18064	7.47579	9.3601e-12	6.4297e-11	15.9843	UP	6.00889	5.97377	5.74468	6.08267	6.12996	6.17335	6.02732	6.53151	6.1668	6.41218	6.12945	7.08151	5.80511	6.04347	6.15559	6.11682	6.02816	5.69258	5.40763	6.41443	5.64252	4.82993	4.90075	4.48714	4.98592	4.99017	5.00368	5.16737	5.15218	5.34882	5.37614	5.48915	4.7947	5.1073	4.49211	4.09003	4.25909	5.48538	5.86968	3.642	5.79616	3.93681
BTG2	-1.16765	8.52306	-8.20471	1.779e-13	1.57238e-12	19.895	DOWN	7.56984	7.20711	7.76978	7.78125	7.72861	7.49984	7.49232	7.62952	7.65067	7.63127	7.22781	7.22732	7.66046	7.31087	7.62692	7.49624	7.55747	7.84177	7.67199	7.56888	7.21472	8.98357	9.43973	7.91703	7.75936	8.78068	9.70016	8.23208	9.56202	8.16339	7.91987	9.50297	8.80504	7.69376	8.51955	8.18639	9.52256	9.01014	9.4617	7.53559	10.4393	8.8308
BTNL8	2.18005	6.91161	5.89969	2.87455e-08	1.16702e-07	8.10149	UP	10.0637	10.1152	9.10303	8.001	4.58072	9.01494	9.46847	9.39091	7.24017	8.4471	9.2968	9.16988	9.16796	8.12194	9.66378	7.68556	9.26803	6.98102	10.9009	8.01265	9.94772	5.99111	7.06995	8.40461	4.89143	4.80572	7.09506	7.9953	5.39763	4.56561	8.30082	5.24726	6.55495	7.07442	5.57065	7.22137	6.02594	8.15062	5.29013	9.43023	4.91956	5.98861
C10orf10	-1.66865	7.98892	-10.4077	6.60056e-19	1.33642e-17	32.2786	DOWN	6.40592	6.39753	6.7266	6.53511	6.30116	6.60946	6.58199	6.25233	7.63661	6.64874	6.65473	6.24925	6.29213	6.3897	6.24349	6.31209	6.3685	6.97035	7.06943	7.00677	6.64851	9.31564	8.82155	7.66023	9.67954	9.0149	8.15391	8.01143	8.73041	7.22671	7.35852	9.40814	10.1203	7.54919	8.50627	8.79928	8.6704	8.06919	8.60229	7.18399	9.09945	7.81308
C11orf96	-1.2394	7.78334	-9.56905	8.21098e-17	1.20802e-15	27.496	DOWN	6.73403	6.72325	6.76318	6.73744	6.47945	6.8835	6.71602	6.65372	6.60586	6.51784	6.69283	6.72738	6.80687	6.73369	6.53127	6.79633	7.19007	6.78728	7.07722	6.66197	6.74439	8.25715	8.99615	7.36865	7.09921	8.3774	8.24823	7.97853	8.47635	7.09933	7.39073	8.68833	8.23909	7.55749	8.06157	8.18509	8.9835	8.46429	8.61583	6.89079	9.81733	7.86274
C12orf75	1.49899	8.93233	7.52855	7.0565e-12	4.93955e-11	16.2627	UP	10.182	10.3075	9.77389	9.8351	10.1721	10.2169	10.3386	10.3445	10.2744	10.5252	10.3496	10.4007	9.86103	9.98838	10.5736	10.1021	10.0881	9.78777	10.3065	10.363	10.2586	7.17496	7.68341	8.8057	9.79257	9.14729	8.87022	7.89071	7.80368	9.07906	9.05717	8.49304	8.0356	9.19146	8.27287	8.02561	5.70416	8.83727	7.42436	9.72269	6.41339	7.99702
C15orf48	1.86104	9.59376	4.81933	3.8843e-06	1.13166e-05	3.33485	UP	11.3181	11.3255	11.2196	11.0458	10.2575	11.5637	10.6165	11.7132	10.9231	10.9256	10.9149	10.992	11.5588	10.7434	10.599	10.7063	10.9136	11.0764	12.3676	11.7896	11.763	10.9106	8.98648	10.1239	9.63435	11.0085	10.3882	7.68058	9.60165	11.2432	10.8208	7.67126	10.7115	9.3163	10.1777	10.226	6.79228	8.39634	10.5226	9.7228	3.86287	7.14891
C15orf65	1.5484	5.6958	11.2002	6.71193e-21	1.85396e-19	36.8323	UP	6.83882	7.19406	6.62923	6.58464	7.23451	6.95343	7.20646	7.25239	6.72543	7.72287	7.07788	6.49607	7.13273	6.3923	7.29215	6.7183	7.18052	6.6138	6.95837	7.31454	7.43667	5.17106	4.90914	6.46653	4.96014	4.70893	5.98929	5.17912	6.16456	5.8951	6.53099	5.00133	5.91504	4.65473	5.56027	5.09392	4.54212	5.68148	5.75918	5.05441	4.8007	5.43744
C16orf89	2.16723	6.60853	7.05193	8.80417e-11	5.25568e-10	13.7773	UP	7.61333	8.82882	8.74637	9.17237	9.96959	9.39569	8.84033	8.24018	9.21629	9.09193	9.59224	8.98202	7.91439	8.21393	8.20473	8.66596	7.70579	8.88457	4.94839	9.37992	5.44369	5.39022	6.4269	5.24795	4.15445	6.67375	7.64988	7.38117	6.20486	6.92057	9.41189	6.98101	5.06273	4.75934	5.70531	5.25596	8.02383	7.81362	7.56915	5.77344	7.0549	8.89739
C17orf58	1.54523	7.53538	13.5447	8.96847e-27	6.48358e-25	50.2674	UP	8.60078	8.54134	8.1362	9.41674	8.87278	8.96981	9.05665	9.26662	8.8707	9.04801	9.2727	9.32747	8.61715	9.00873	9.2894	8.66543	8.75464	8.21208	8.25701	9.34075	8.00541	6.43387	7.1495	7.58744	7.84214	6.93842	7.6443	7.01571	7.00394	7.53458	7.76439	6.98347	6.749	7.45538	7.05828	7.03058	5.153	7.68284	7.64755	7.84742	7.40179	7.70404
C19orf33	1.82625	9.31454	5.48474	2.02491e-07	7.1892e-07	6.19831	UP	10.7842	11.0952	10.418	10.4641	10.0624	11.0896	11.3424	11.0862	10.7827	10.9567	10.8658	10.3761	10.7053	10.7149	11.3037	10.4581	11.1884	10.719	11.1781	11.2505	11.0137	8.72576	7.41348	9.69471	10.8808	9.19108	9.12562	8.76583	8.74098	9.47933	10.7926	8.43649	6.88087	10.1503	8.99933	9.49591	7.63546	10.4878	8.07886	10.0181	3.284	6.81878
C1orf106	1.28538	9.21719	4.68208	6.9355e-06	1.94233e-05	2.77591	UP	10.2947	10.2729	10.3499	10.1183	9.67763	10.3473	10.3085	10.4455	10.041	10.4083	10.3341	10.3192	10.4498	10.3943	10.3419	10.0611	10.2093	10.2808	10.709	10.3597	10.5365	9.05182	8.20522	10.184	9.85839	9.92986	8.98711	9.06085	8.86532	10.2318	9.79198	7.9206	8.6081	9.0166	9.75393	9.84444	8.66034	9.68513	7.9994	10.7931	4.59064	7.26094
C1orf116	1.91668	7.67388	6.99673	1.17427e-10	6.86901e-10	13.494	UP	9.13205	8.89435	9.3982	9.32983	9.34224	9.50649	9.27997	9.54212	9.1117	9.28315	9.44411	9.58753	9.15968	9.38581	9.45444	9.19417	9.12318	8.88835	9.44798	9.5855	8.90731	6.17104	5.88471	7.98208	8.45059	7.36829	8.84074	7.32556	7.08264	8.58854	9.05361	6.01802	6.10227	6.93114	7.61315	7.60737	6.43403	8.23236	6.69106	7.66281	3.75541	7.63575
C1orf162	-1.4685	7.17443	-9.08772	1.27132e-15	1.55958e-14	24.7822	DOWN	5.21034	5.80912	7.04927	5.25439	5.75622	5.74405	5.7371	5.95668	5.55082	5.98865	5.52678	6.59769	5.72752	6.83509	5.80094	5.89412	5.77036	6.77687	5.54202	6.11676	6.08578	7.99752	7.91896	6.49884	7.30182	7.57906	7.59765	7.44492	7.61466	6.77606	6.66995	7.64031	8.15632	6.57702	7.1369	7.7657	6.87558	7.18433	8.79023	6.44718	9.06243	7.42837
C1orf174	1.05674	6.65476	9.91705	1.11648e-17	1.87707e-16	29.4737	UP	7.6887	7.72564	7.29487	7.22502	7.18308	7.51439	7.64783	7.74268	7.36734	7.58855	7.65894	7.99056	7.53856	7.40401	7.92605	7.3771	7.59462	7.4835	7.28628	7.61782	7.55538	6.45045	6.19669	6.25232	7.26858	6.87903	5.97523	6.81893	6.90945	6.74785	7.11949	6.63568	6.50897	6.30876	6.41378	6.12582	5.54534	6.83383	6.76153	6.91865	6.10813	6.12201
C1orf198	-1.41408	8.91781	-11.7658	2.52912e-22	8.88158e-21	40.0877	DOWN	7.81068	7.64073	7.47856	7.48589	7.87869	7.97117	7.8973	7.64701	7.88904	7.75099	7.8688	7.68622	7.55794	7.85643	7.57573	8.02087	7.68577	7.71023	7.29221	7.94002	7.65836	9.46703	9.47473	8.62967	9.19603	9.79135	8.41263	9.64446	9.84607	8.51335	8.61742	9.74799	9.8098	9.18932	9.46157	9.51162	9.93738	9.4542	9.14176	9.21994	9.36654	8.35954
C1orf210	1.93163	6.4994	7.85904	1.18325e-12	9.32586e-12	18.024	UP	8.03719	7.87127	7.60848	7.8061	8.12341	8.13582	8.07351	8.50516	8.03512	8.61976	8.21075	8.52392	8.03778	7.90963	8.37402	8.01365	8.0451	7.86707	8.13821	8.60094	8.06149	5.92554	4.27169	7.28552	7.23984	5.16971	7.77129	6.19613	6.33047	8.06278	8.29077	4.4191	5.71129	6.60509	6.41956	6.48011	5.69845	6.65199	4.99904	7.88382	4.01619	6.62002
C1orf216	-1.02508	6.74716	-7.74622	2.1833e-12	1.65185e-11	17.4196	DOWN	5.93838	6.23707	6.05741	5.32882	5.798	5.59825	5.84984	5.90541	5.78677	5.78555	5.92035	6.12896	5.82891	5.94522	5.81638	6.08811	5.87961	6.42365	5.86506	5.85561	5.55088	6.7869	6.88177	6.40029	7.25244	7.09375	6.16166	7.2921	8.2464	6.6367	6.48515	7.44844	7.31263	7.27004	6.59402	7.06249	8.67068	7.07606	7.96901	7.30245	7.59925	7.80035
C1orf54	-1.30881	8.74858	-8.29874	1.05798e-13	9.68162e-13	20.4085	DOWN	7.81709	7.71694	8.21578	7.16528	7.45516	7.8046	7.40306	7.61739	7.21652	7.51818	7.31714	7.96525	7.61137	7.37476	7.23098	7.65457	7.68654	8.34176	8.10978	7.6063	7.77951	8.7965	9.62539	7.9918	8.58313	9.0381	8.47451	9.20498	9.53997	8.03666	7.63398	9.8029	9.32691	8.38689	9.15046	9.50183	8.63661	8.68927	10.5336	8.15718	9.83788	9.91218
C1QA	-2.19057	8.98113	-14.2337	1.7876e-28	1.68058e-26	54.1576	DOWN	7.23107	6.81553	8.09593	6.8324	7.35651	6.90434	6.62162	6.92914	7.15308	6.77686	6.45184	7.60798	6.98766	7.03097	7.04296	7.00531	6.89757	8.45826	7.46015	6.98685	7.27408	8.92873	9.94176	8.56513	9.94881	9.54055	9.6248	9.32719	10.0933	8.73586	8.57886	8.91372	10.006	9.07894	8.88443	9.2456	9.05492	9.15992	11.2545	8.78081	10.892	9.08054
C1QB	-1.53828	9.04038	-8.54828	2.6421e-14	2.64021e-13	21.78	DOWN	7.88904	7.70575	9.06589	6.92339	7.23782	7.72093	7.32559	7.76413	7.58323	7.52441	7.30466	8.52946	7.45115	7.36791	7.36093	7.28569	7.38074	9.50337	8.19383	7.65245	7.913	9.05082	10.0675	8.40857	10.0629	9.70214	9.44685	9.49329	10.1874	8.7637	8.38566	8.7524	10.0832	9.02756	8.86771	9.28997	8.88	8.84121	11.5008	8.89824	10.8045	8.67861
C1QC	-1.8375	9.60639	-11.805	2.01541e-22	7.19815e-21	40.3132	DOWN	8.0894	7.97389	8.98438	7.5987	7.81671	7.91024	7.69395	8.2362	7.97875	7.83232	7.4078	8.58616	7.83141	7.83561	7.83042	7.96289	7.75332	9.10475	8.48807	7.99692	8.37375	9.99164	10.3417	9.23888	10.5313	10.3475	9.92274	10.342	11.015	9.82373	9.35714	9.57735	10.7628	9.99579	9.35466	10.0815	9.98174	9.67806	11.5375	9.6083	11.144	9.4731
C1R	-2.32	9.99641	-11.2062	6.48337e-21	1.79793e-19	36.8667	DOWN	8.15851	8.023	8.99565	7.88441	7.48398	8.18049	7.76133	7.55687	7.84766	7.50463	7.87535	8.38021	8.28752	8.08665	7.51697	8.1555	7.98673	9.47587	8.12304	7.76972	7.90139	10.8412	11.8021	10.2457	10.5661	11.1524	10.5288	11.0671	11.2868	9.29107	9.50807	11.5954	11.5243	9.75264	10.7843	10.6543	11.0373	10.7606	10.9806	8.05817	12.0899	9.80859
C1S	-3.15486	9.68516	-15.0522	1.80056e-30	2.41979e-28	58.7256	DOWN	7.41055	7.42571	7.99891	6.33089	6.78908	6.83499	6.55525	6.46824	6.76477	6.51208	6.56926	7.70058	7.05267	7.31924	6.34824	7.28917	7.1934	7.76739	7.35791	6.77854	7.20947	10.656	11.5215	10.1275	10.2841	11.0986	10.3599	10.9102	10.7159	9.00665	9.34975	11.4726	10.807	9.5184	10.5962	10.3942	10.251	10.7169	10.7101	7.69547	11.6751	9.83416
C20orf27	-1.23287	7.06419	-9.64283	5.38353e-17	8.14327e-16	27.9143	DOWN	6.17212	6.14451	6.10816	5.84954	5.7501	6.09567	6.20853	5.96119	6.09108	6.00781	6.04697	5.89965	6.01294	5.97092	6.0226	6.04278	6.05476	6.14143	5.96916	5.95349	6.07327	7.2175	7.57928	6.96261	7.25856	7.4613	6.5241	7.84261	8.28417	6.45561	6.63769	7.91861	7.31239	8.19002	7.3126	7.26685	8.68038	7.66441	8.29832	7.84874	8.05147	6.37047
C2CD5	1.30504	9.45191	10.7314	1.01532e-19	2.32381e-18	34.136	UP	10.1861	10.1169	10.4623	10.5585	10.7001	10.7773	10.3886	10.7152	10.8983	10.7587	10.8352	10.6277	10.34	10.6377	10.7595	10.8041	10.4406	10.5048	10.1786	10.8474	9.99841	9.1704	9.15032	9.92936	9.16232	9.02956	9.00883	8.32164	7.78628	8.87953	9.41643	9.41712	9.39928	9.44175	9.47764	8.93819	6.72581	9.272	8.6078	8.23736	8.81992	8.69036
C2orf40	-2.06904	8.28797	-4.04865	8.71489e-05	0.000202671	0.351683	DOWN	5.83194	4.88992	7.05985	7.48711	7.43268	5.67071	7.24965	6.25994	6.38758	5.67262	6.18057	7.0167	6.89883	9.00686	5.69637	8.88885	5.00765	6.32893	4.14323	7.37785	7.02226	9.65234	11.0948	4.60496	6.70244	9.92378	9.12526	11.5936	11.0591	6.43165	8.73098	12.1424	8.65051	6.61781	9.7455	8.42763	11.4942	11.738	12.2769	5.05045	11.3356	7.57744
C3	-3.28239	10.639	-11.6017	6.54566e-22	2.13753e-20	39.1434	DOWN	7.36481	8.23269	10.4237	7.68341	7.93951	8.15259	6.81763	7.57687	7.76564	7.04039	7.02956	7.86984	8.12023	8.229	6.40669	8.76827	7.50061	11.039	6.93296	7.54815	7.01436	12.1702	12.2521	11.4373	13.1767	12.0944	10.6178	11.1375	12.2878	9.79733	9.87695	12.3675	12.4793	12.3843	12.2034	12.5486	12.2228	11.5125	11.6786	11.2307	13.0492	9.06121
C3AR1	-1.25349	8.31343	-9.15154	8.85447e-16	1.11225e-14	25.1404	DOWN	7.27581	7.39048	8.13315	6.74283	6.80408	7.29457	6.70456	7.22697	7.15397	7.13523	6.86522	7.64501	6.87231	7.18544	7.2524	7.13465	7.19466	8.45543	7.4578	7.16636	7.35562	8.66282	8.6806	8.30856	9.13379	8.49236	8.13288	8.63024	8.73322	8.10673	7.66751	8.39639	9.14517	8.39208	8.32428	8.63638	7.32233	7.97713	10.2161	7.56603	9.27381	8.28114
C3orf52	1.47831	5.3348	8.81823	5.81999e-15	6.4219e-14	23.2765	UP	6.62338	6.12009	6.46231	6.53772	6.57652	6.96056	6.42554	6.84922	6.30707	7.15994	6.7711	6.75255	6.4922	7.44572	6.55146	6.37198	6.30024	6.39136	6.74881	6.33359	5.95496	5.6295	4.05534	5.64508	5.03881	4.48104	5.66709	4.96235	4.56539	5.99746	6.24571	4.05009	6.69707	5.22011	4.84327	4.52788	3.91855	4.90098	4.27798	5.9364	3.36139	4.96756
C4B	-1.27681	6.7199	-7.11104	6.46151e-11	3.91972e-10	14.0817	DOWN	5.00985	5.80746	6.34656	5.55348	4.97398	6.13787	4.92889	5.97232	5.22135	5.21944	5.17163	5.71649	6.05016	6.0489	5.19818	6.18074	5.64241	6.49917	6.20786	4.9062	5.77767	7.22179	8.5541	5.88026	6.36802	7.02064	6.86618	8.17998	7.53739	6.38134	6.46687	8.13093	7.9942	6.30574	7.57562	7.28715	8.65277	6.87229	7.57391	7.53234	8.52031	7.71556
C4orf19	2.41632	6.74675	8.39084	6.34863e-14	5.96589e-13	20.9133	UP	8.53191	8.61431	8.83872	8.80924	8.60747	8.70445	9.00352	9.09765	8.79386	9.2026	8.96631	8.99589	8.45845	8.78868	8.87012	8.52066	8.56377	8.71711	8.75979	9.01587	8.49134	5.35162	4.70508	7.40018	3.31096	6.59369	7.3624	5.71861	5.56372	7.80613	7.7032	3.74363	5.56581	5.97933	7.50238	7.68318	4.72743	7.49235	5.42626	6.91359	3.48597	6.96278
C4orf48	-1.00664	7.14142	-6.30539	3.96495e-09	1.84763e-08	10.0392	DOWN	6.30939	6.08618	6.39065	6.49008	7.01599	5.78371	6.20876	6.3709	5.94452	5.82469	5.73202	6.08078	7.11675	5.82091	5.60212	5.8849	6.63457	6.44636	7.85758	6.00525	6.58744	7.42499	8.08132	7.44594	6.19853	7.35567	7.07728	7.87322	8.4187	7.35878	7.51139	7.28033	7.76986	7.73856	6.88857	7.68891	8.12188	7.85155	7.46765	8.10975	6.98238	8.13142
C5AR1	-2.75066	6.81508	-16.1592	3.99524e-33	8.05386e-31	64.795	DOWN	4.2863	4.11608	5.10303	4.26716	4.20069	4.66957	4.19934	4.2379	4.12413	4.36229	4.61433	4.93364	4.46709	4.99992	4.68488	4.36894	4.47613	4.71003	4.73979	4.39691	4.58446	7.34684	8.01086	7.23828	8.14112	7.56335	7.51244	6.84027	8.61607	6.54552	6.63283	7.68011	8.37974	7.11214	6.87671	7.93634	6.26541	7.32056	8.47167	6.82493	8.28013	7.4695
C5orf30	1.89559	7.02577	11.6471	5.03064e-22	1.67942e-20	39.4048	UP	8.5757	8.2748	8.63755	8.49917	8.31972	8.73888	8.66641	8.99909	8.57067	8.95928	9.10084	8.80573	8.5902	9.05526	8.78066	8.31432	8.57379	8.15746	8.78918	8.57701	8.02989	6.63902	5.72208	6.99791	6.61161	6.28397	7.35584	6.53711	6.07028	7.84514	7.86098	5.88809	6.0999	6.77446	6.23084	6.089	5.00542	6.39513	5.86698	4.98627	6.05607	6.37081
C6	1.24664	5.11123	5.04259	1.47945e-06	4.61831e-06	4.26796	UP	4.55763	7.62015	5.44239	4.89995	6.38286	6.42192	7.22868	7.70084	5.67802	8.72143	7.32618	7.71605	4.59191	4.58288	7.78853	5.48212	6.10517	4.95498	4.32735	5.95459	5.86668	4.35604	4.1626	4.21753	3.8683	4.06949	5.50072	4.77143	5.63138	4.90419	5.43208	4.28294	4.94109	5.55815	4.71107	3.60528	4.95441	4.6748	4.41951	4.18874	6.14036	5.07426
C6orf1	-1.03375	5.75648	-10.8662	4.65041e-20	1.11936e-18	34.9109	DOWN	4.64514	4.77348	5.12466	4.92329	4.90639	4.69742	4.81277	5.15924	5.32555	5.26638	4.79951	5.1568	4.76948	4.71959	4.92724	4.7109	4.78897	4.72273	4.70191	4.91916	4.78039	5.81397	6.05707	5.2375	6.17362	6.26689	5.8386	6.26209	6.89036	5.56427	5.63447	6.39245	6.1009	5.72383	5.92059	6.48011	6.92793	6.01136	6.73837	5.80192	6.51629	5.80227
C6orf132	2.23907	5.88332	11.8186	1.86201e-22	6.7074e-21	40.3919	UP	7.66756	7.75703	7.6804	7.82544	7.75439	7.50866	7.68742	7.95208	7.48698	7.9121	7.8613	7.85566	7.67037	8.13281	7.98999	7.8036	7.67956	7.5768	7.93642	7.74151	7.60954	4.49292	3.94178	5.34547	5.67375	5.24789	5.76591	7.01149	5.11209	6.04842	6.45426	4.67366	4.56845	6.00161	7.56631	7.66814	5.12137	5.70247	4.90937	5.90917	3.75407	5.12231
C6orf141	2.30618	5.02346	12.914	3.33037e-25	1.90768e-23	46.6761	UP	7.54366	7.1286	7.30796	6.4032	5.86665	7.25348	6.7037	6.22268	5.91939	6.04921	7.07601	6.63963	7.70526	8.03379	7.49372	6.23776	7.23634	7.26911	7.77024	6.7817	7.57563	3.59136	3.9722	5.18314	4.73651	4.06684	5.01036	3.60787	3.89153	5.73302	5.08952	4.48298	3.32821	4.08091	4.3072	4.96205	4.11573	4.55265	3.38878	3.8174	3.46054	3.9483
C6orf58	3.75197	5.94429	7.4119	1.31652e-11	8.83228e-11	15.6481	UP	9.3788	10.0111	10.1835	6.75546	10.3499	10.4281	10.5661	8.19591	7.77205	10.4735	10.2045	9.59234	9.34809	8.78116	9.19068	9.23742	9.63565	9.70612	5.35466	9.66112	6.26041	3.57377	3.64624	3.84261	3.46776	4.48135	8.35501	9.89319	6.07792	7.35376	10.7352	3.20423	3.19778	3.73696	6.70993	3.47968	3.77759	9.75616	6.69064	5.47822	3.76599	4.56231
C7	-1.88586	6.53384	-6.21237	6.28153e-09	2.83392e-08	9.58864	DOWN	4.55303	5.23133	5.26714	4.95991	5.29298	4.61746	5.15207	4.80438	4.68586	4.84885	4.41627	5.02149	4.92427	5.53197	4.49027	5.95825	4.85974	4.93495	4.53854	4.69122	5.12826	8.277	7.32532	4.70482	6.00417	7.79566	6.66404	7.48084	8.7073	5.38609	6.27812	8.36298	8.40189	6.11255	6.93234	7.42261	7.17415	7.45373	7.38216	4.13911	9.50932	9.15169
C7orf31	1.0845	5.6169	8.57702	2.25035e-14	2.26929e-13	21.9387	UP	6.35991	6.31074	6.33862	6.75529	7.31197	6.39304	6.55335	7.41154	6.30008	6.86191	6.739	6.60896	6.62388	6.53655	6.61918	6.53211	6.12633	6.16663	5.73914	6.86395	5.95395	5.38232	4.81734	6.07291	4.2553	5.62037	5.53841	5.8902	5.11848	5.14429	5.59358	5.39237	5.22433	5.74401	4.57575	5.33711	4.81073	5.40477	5.44893	4.22587	4.7512	5.01287
C8orf49	1.92538	3.43726	16.5901	3.84125e-34	9.58711e-32	67.1203	UP	4.24874	4.41209	4.41746	5.16645	5.18491	4.82521	5.03308	5.64206	5.15647	5.33646	6.55231	5.59471	5.16339	4.86239	5.56722	5.2367	4.94226	4.67319	4.29216	5.12371	4.75201	2.72833	3.03567	2.78195	2.42082	3.4142	3.06467	3.52586	2.92223	3.65459	3.957	2.85683	2.49567	3.15523	2.86111	2.41715	3.22146	3.25102	3.00209	3.06991	2.93686	3.0007
C8orf88	-1.53324	5.2434	-5.02879	1.57168e-06	4.88658e-06	4.20941	DOWN	3.63047	3.61389	3.85833	3.86546	4.79629	3.84338	4.05602	3.80096	3.78814	4.25149	4.16048	3.75581	3.83271	4.34359	3.93942	4.15161	3.75005	4.03955	3.54559	4.50372	3.50871	5.41134	6.9999	3.57891	4.50865	5.82216	4.53544	6.89024	6.92441	3.84923	4.3876	7.23589	5.75961	4.55678	6.05403	5.10035	5.7674	7.1094	7.78533	3.36912	8.13021	5.29438
C9orf152	1.46377	7.71197	4.04756	8.75122e-05	0.000203448	0.347725	UP	8.65365	8.89134	8.90441	8.94884	9.15287	9.09739	9.09682	9.03992	9.02127	9.12954	9.12548	8.78639	8.88265	9.25717	9.04487	9.05457	8.98538	9.03005	7.92275	9.13935	8.63555	8.5148	3.54066	9.54857	3.60331	7.24139	8.20905	8.02441	8.02431	8.59052	9.26514	6.671	8.6055	6.53418	8.58205	8.08829	6.90119	8.37388	8.71218	9.47569	3.43074	7.74879
CA2	3.21193	10.6746	6.3519	3.14608e-09	1.48687e-08	10.2659	UP	13.0801	13.108	13.3744	13.6261	13.3969	13.4042	13.4416	13.5583	13.3988	13.2983	13.5709	13.7411	13.3612	13.4087	13.5224	13.4184	13.5452	13.1427	13.2467	13.626	12.6154	6.7932	4.82524	11.3029	8.07167	10.6693	12.9861	8.81109	9.05718	12.7974	13.0605	10.1943	6.53782	7.9284	11.8135	9.97005	6.16303	12.019	8.32958	10.2179	5.9227	12.0602
CA4	1.02177	4.52502	6.35635	3.07706e-09	1.45655e-08	10.2876	UP	5.16611	5.2209	4.99379	5.83788	6.13119	5.45644	5.37185	5.24185	5.66042	5.44017	5.57951	5.13872	4.97968	5.69373	5.3171	5.5332	5.01061	5.71411	5.14826	5.9758	4.45771	3.72532	4.19702	4.61328	3.73777	3.70306	5.02288	3.95051	4.17397	4.52075	4.49228	4.07185	3.75623	4.09388	3.80268	4.34318	4.78588	4.46572	3.98345	6.90953	5.03388	4.41638
CA9	2.92179	7.06372	7.795	1.67594e-12	1.29178e-11	17.6805	UP	8.5534	8.72563	8.42754	10.1789	10.6001	8.70411	9.98443	10.1675	10.4938	9.60602	10.0674	10.1187	9.26582	9.86139	10.5133	10.025	10.0858	9.03401	8.36734	9.59886	7.55527	8.00434	6.032	7.54043	5.4688	4.6883	9.96729	6.76389	5.38	9.52603	9.09872	4.83136	6.75243	4.67789	8.37023	6.40724	6.0849	6.90003	4.8117	9.42016	4.69417	9.78714
CABLES1	1.03053	6.36781	8.90023	3.66754e-15	4.17881e-14	23.7335	UP	7.00846	6.80794	6.85876	7.67991	7.13802	7.37616	6.87645	7.77293	7.67451	7.6805	7.69304	7.08622	7.40182	6.99503	7.62906	7.64238	7.19544	6.9809	6.37697	7.69657	6.3511	5.91522	5.61116	6.02611	5.36898	6.32699	6.32438	6.37122	6.12267	6.6345	6.6113	5.99185	5.79442	6.15133	6.56329	6.61347	6.26857	6.40912	5.83531	6.91395	5.57086	6.04995
CADPS2	1.06698	7.52086	7.93778	7.70227e-13	6.23468e-12	18.4478	UP	8.26599	8.42863	8.07838	8.59775	8.49415	8.46544	8.61051	8.43495	8.48306	8.8858	8.74145	8.49767	8.15172	8.6241	8.79422	8.3167	8.36922	8.49081	7.41477	8.80515	7.82943	6.78254	7.29984	8.20235	8.05934	6.9533	6.96334	7.49662	6.97073	7.21823	8.07352	6.93877	7.65127	6.93784	7.98938	7.29853	5.91124	7.49617	7.70869	7.31766	7.3724	7.88928
CALCOCO1	-1.24703	7.72285	-12.994	2.10357e-25	1.22504e-23	47.1326	DOWN	6.45998	6.78285	6.44355	6.85288	6.85748	6.94048	6.64362	6.78746	6.65742	6.65526	6.66889	6.65022	6.5387	6.23011	6.43979	6.89906	6.65458	6.93244	6.52188	6.84893	6.69272	8.15707	8.33582	7.62288	7.57442	8.3789	8.17134	8.42681	8.63008	7.93569	7.75292	8.27617	8.2423	8.42341	8.01955	7.85375	9.02068	7.91848	8.19888	8.28446	8.49649	8.04811
CALCRL	-1.42078	5.59051	-8.62675	1.70409e-14	1.753e-13	22.2137	DOWN	4.16743	3.93732	4.31692	4.54805	4.7321	4.2875	4.39881	4.50395	4.23013	4.25615	4.80873	4.37048	4.29832	4.56724	4.46349	4.73074	4.44927	4.79191	3.85537	4.671	3.92623	5.31729	6.45788	5.35185	6.78551	5.77728	5.65445	6.43323	6.33724	4.93068	5.01814	6.62969	5.96205	5.28499	6.84955	6.51106	4.98506	5.66548	5.85528	5.04832	7.17801	4.86646
CALD1	-1.89181	7.57245	-9.55503	8.89626e-17	1.30427e-15	27.4166	DOWN	6.01596	5.80065	5.93841	6.21536	5.90934	6.08334	6.08333	5.6565	5.91513	5.73766	5.99322	5.81922	5.82544	6.43532	5.70348	6.06815	6.05162	6.27094	6.00602	6.05264	6.03202	7.99629	8.66144	7.25545	7.38484	8.20028	7.55828	8.53028	7.10512	7.1634	7.00385	9.25716	8.41962	7.73776	8.30601	8.41595	7.69361	8.78878	8.16684	6.14661	9.19263	8.60178
CAMSAP3	1.27003	5.50409	8.51338	3.2101e-14	3.15073e-13	21.5875	UP	6.55973	6.69795	6.50311	6.61756	6.44914	6.62208	6.57155	6.75548	6.02806	6.80053	6.63622	6.33169	6.76859	6.50567	6.58472	6.56071	6.3588	6.62741	6.98357	6.60737	6.44352	4.86387	5.35136	6.42049	5.6887	5.13501	5.99863	5.0448	5.70733	6.12813	6.0911	4.17454	5.84676	5.46417	4.88657	5.29566	5.50505	5.35132	5.03736	6.83012	4.2011	4.99801
CAP2	-2.48961	6.39833	-8.7709	7.59442e-15	8.23678e-14	23.0132	DOWN	4.21482	4.51675	4.42185	4.03956	4.44241	4.33219	4.6913	4.50989	4.21408	3.63492	4.07441	4.17726	4.0616	4.43434	4.35199	4.58391	4.27373	4.29188	4.20267	4.46678	4.46444	7.41041	7.72003	4.79315	6.30531	7.37221	5.73509	8.03957	8.16756	5.08932	5.57269	8.22789	7.2203	7.1856	7.05004	6.80079	7.15172	8.13982	8.20092	6.97515	8.56744	8.49434
CAPN13	1.92231	5.22428	12.2448	1.58046e-23	6.97564e-22	42.8417	UP	6.37589	6.74931	6.77359	6.49748	6.99319	7.02132	6.77983	7.29959	7.04696	7.16873	6.96967	6.96972	6.87074	7.16155	7.29728	7.12816	6.82058	6.44713	6.39242	7.06837	5.82458	4.44928	4.68561	4.54212	4.27681	4.1031	5.93765	4.81084	4.51507	6.20522	6.18501	4.07093	4.15611	5.27856	4.66221	4.25333	4.86871	4.55441	4.112	5.20744	4.16026	5.04227
CAPN8	3.69425	8.5866	8.95316	2.7208e-15	3.17074e-14	24.029	UP	11.0581	11.7821	11.7633	12.2337	11.7764	12.2344	11.6416	12.1029	11.263	11.9312	12.156	12.2565	11.08	11.8909	12.0043	11.4786	11.6628	11.6686	11.134	12.1125	10.3247	7.56496	3.96621	9.00574	6.49897	7.53364	9.73612	6.31524	6.59151	10.3326	10.5244	7.60214	5.6699	7.78792	8.3223	8.05739	7.76015	7.85724	6.37231	7.19578	3.57895	8.58416
CAPN9	4.28924	6.69901	12.0082	6.21208e-23	2.46193e-21	41.4821	UP	9.82657	9.62913	10.3656	10.4479	10.2355	10.5687	10.5371	10.6883	10.3741	10.8735	10.8268	10.0312	10.1148	10.5364	10.8478	10.2533	10.5777	10.1905	9.43931	10.5779	9.48093	6.85358	4.65699	6.11743	4.56178	4.24222	8.25259	5.12124	7.04319	8.61199	9.01624	4.27164	7.85177	4.17678	5.80123	5.1589	5.10986	5.59718	5.55789	6.3124	4.14417	7.0806
CARD6	1.25579	7.6392	10.0997	3.90296e-18	7.12146e-17	30.5159	UP	8.72633	8.78526	8.76329	8.59844	8.36106	8.85597	8.78185	8.95555	8.37788	9.04747	8.54444	8.85287	8.62319	8.82785	8.81936	8.36731	8.68331	8.73062	8.63447	8.61079	8.65199	6.52049	7.10219	7.68085	5.55738	7.07361	8.12537	6.9206	6.66623	8.32901	7.79662	7.23214	7.61245	6.5649	7.49406	7.26093	6.15668	7.26887	7.48838	8.18182	7.40289	6.40343
CARMN	-1.77545	7.33763	-5.82053	4.19691e-08	1.66329e-07	7.732	DOWN	6.02157	5.6653	6.07514	6.01981	5.90826	5.70778	5.91879	5.45836	5.65636	5.56085	5.6686	5.57173	5.66277	6.48973	5.57781	6.17927	5.78356	5.99598	5.71079	5.92615	6.17875	8.02708	9.45751	5.95079	6.72433	8.24017	6.96043	9.4314	9.10976	6.0353	6.59748	9.31061	8.11468	6.82588	8.66451	8.25881	10.1651	8.79569	8.27305	5.67351	9.89527	8.46218
CASP3	1.31865	8.22508	9.34676	2.91958e-16	3.94896e-15	26.2392	UP	9.27079	9.5129	9.38962	9.06359	8.78049	9.3865	9.61486	9.59459	8.81345	9.52481	9.35799	9.36964	9.55034	9.35276	9.67035	8.65221	9.46378	9.17619	9.66458	9.1692	9.63424	7.0814	7.70997	8.27403	8.6582	7.2042	8.25092	8.08157	7.48616	8.48031	8.4223	7.57426	7.48097	7.71297	8.2905	7.66127	5.59249	8.13682	7.75815	8.3661	7.5185	7.0943
CASP6	1.23012	7.95242	10.5402	3.06988e-19	6.56736e-18	33.0381	UP	8.93448	9.20586	8.83021	8.76925	8.92771	8.98011	9.14707	8.93697	8.97415	9.2914	8.82283	8.99927	9.10374	8.8388	9.11193	8.51446	9.22349	8.63824	9.10316	9.167	9.20342	8.26855	7.37426	8.44406	7.32808	7.33179	7.58152	8.20437	7.58696	8.56162	8.59033	7.5176	8.14177	8.14167	7.5789	7.32432	6.11528	8.04349	7.33086	8.82189	6.83369	7.35318
CASP7	1.75431	8.63396	10.8835	4.20674e-20	1.01959e-18	35.0104	UP	10.3028	9.99212	10.1706	9.86822	9.32726	10.217	9.93042	10.2548	9.64912	10.3966	10.3672	10.5858	9.83841	9.68956	10.2365	9.68538	10.2748	10.132	10.6489	10.3984	10.3269	8.35676	8.06257	9.35118	8.70131	7.7924	8.57498	7.95564	7.75875	8.78179	9.2024	7.16585	7.41159	7.12992	8.32476	8.16693	5.79207	8.60625	7.78175	8.44962	7.74794	7.43245
CASQ2	-1.4346	5.86982	-5.31294	4.43699e-07	1.49889e-06	5.43574	DOWN	4.34106	4.44003	4.68426	5.01272	5.0559	4.37537	4.2058	4.4484	4.29439	4.48218	4.46272	4.17378	4.77886	5.19605	4.72567	5.10485	4.23534	4.62568	4.84296	5.53566	4.91078	6.37448	6.39362	5.27074	5.00328	7.3068	5.8945	6.52104	6.3706	4.71574	5.41283	8.24085	6.67742	5.03654	5.63613	5.76822	6.89253	7.77617	8.20161	4.89301	7.82466	5.56152
CBR1	2.2326	8.90444	15.7297	4.21067e-32	7.35639e-30	62.4561	UP	10.4928	10.4006	9.88206	11.7056	10.8901	10.852	11.0219	10.3926	11.4074	10.9562	11.0319	10.9001	11.5189	10.4985	10.7674	10.9288	10.801	9.88069	10.8295	10.6425	10.6183	7.71152	8.34838	9.01982	8.70146	8.19094	9.29121	8.7578	8.5493	9.43128	9.61394	7.91624	7.69072	7.62668	8.12388	7.98167	7.76139	8.67383	8.57043	8.69731	8.05163	9.3811
CCDC125	1.4248	4.99607	11.4583	1.50274e-21	4.54616e-20	38.3182	UP	6.02356	6.23279	5.9545	6.32713	6.10357	6.02902	6.01461	6.47602	6.24265	6.41312	6.5911	6.69196	6.04272	5.89363	6.25762	5.76919	6.40915	6.08423	6.05952	6.26877	6.19321	4.64953	4.28161	5.13211	4.98208	4.73289	4.93192	4.34911	4.31369	5.50759	5.65319	4.4705	4.99218	5.0708	4.65583	4.0741	3.64844	4.49645	4.59796	5.06337	3.93696	5.11456
CCDC134	1.0845	5.54916	16.0984	5.57102e-33	1.09156e-30	64.4648	UP	6.4003	6.5037	6.38988	6.21788	6.08278	6.49724	6.65904	6.6298	6.42751	6.45798	6.74067	6.3426	6.6338	6.55203	6.66698	6.4062	6.62096	6.28136	6.05884	6.52266	6.59151	5.28004	5.27555	5.5043	5.48237	5.62194	5.48084	5.4148	5.61183	5.46434	5.469	5.04752	5.11908	5.20829	5.56105	5.31714	5.99537	5.81048	5.52486	6.29872	4.9611	5.29161
CCDC142	1.29676	4.42492	16.9965	4.30302e-35	1.21909e-32	69.2935	UP	5.88398	5.23887	5.38624	5.35034	4.81661	5.31951	5.16139	5.54957	5.3495	5.44367	5.89984	5.784	5.93877	5.56635	5.64568	5.70157	5.16674	5.37546	5.80755	5.78509	5.65226	3.79826	4.23697	4.06237	4.39529	4.10831	4.27306	4.35795	4.75688	3.71251	4.20507	3.79875	4.25031	4.5118	4.37316	4.33509	5.23901	4.41011	4.30243	4.20152	3.93513	4.03232
CCDC186	1.58394	5.80393	12.0072	6.24617e-23	2.47077e-21	41.4767	UP	7.16068	7.11685	6.93169	7.13143	7.09589	7.0688	7.2584	7.02559	7.11333	7.29139	7.37347	7.22749	7.11241	6.99412	7.23082	6.91227	7.28255	6.77801	7.66604	7.01674	7.06545	5.80323	5.32139	5.98695	5.61855	5.18464	5.44324	4.99251	4.10029	5.77748	5.99439	4.76773	4.90171	5.26731	5.25609	5.54932	3.63942	5.75832	4.50317	5.66596	4.76331	5.41109
CCDC3	-1.07897	8.00308	-6.98049	1.27779e-10	7.44138e-10	13.4109	DOWN	7.10078	6.88074	6.78095	7.34611	7.12422	7.14638	7.31767	7.15216	7.07509	6.83837	7.26721	6.94464	7.26335	7.59271	7.1037	7.21899	7.09052	6.97831	6.80506	7.22671	6.7573	8.46223	8.98287	7.5691	7.21556	8.8232	8.55505	8.90211	8.74755	7.78874	7.73151	9.77525	9.37729	7.55584	8.39582	8.45679	9.64221	8.36483	9.07122	9.12479	9.10588	7.42273
CCDC58	1.61072	5.94599	9.67163	4.56486e-17	6.97031e-16	28.0778	UP	7.1518	8.29091	6.48815	7.26471	7.44958	6.82517	6.86607	8.13746	7.57558	6.41715	6.81783	6.59061	7.91359	6.59478	7.70089	7.67085	8.11011	7.50217	7.41817	7.78757	6.73657	4.95799	4.8352	4.99033	5.81481	6.29163	5.11678	5.11427	5.47826	5.89588	5.80028	5.58907	4.93682	6.08565	5.58507	6.11301	4.33034	6.71452	6.81567	6.76963	5.00771	4.92385
CCDC68	2.1101	7.32387	8.73471	9.30576e-15	9.96401e-14	22.8122	UP	9.31888	8.96127	8.94965	8.62106	8.77322	9.37702	9.10359	9.01613	8.84375	9.27123	9.15993	9.81221	8.98554	9.06431	9.39917	9.01188	8.8609	8.92716	9.60772	8.9964	9.00275	5.07397	5.85077	7.00181	8.6997	6.76973	7.5839	5.83984	5.6768	7.47548	7.89456	6.02664	4.47851	6.73655	6.25176	5.55337	4.6781	6.44651	5.95626	6.29205	5.38697	9.70386
CCDC80	-2.93773	7.20812	-9.9952	7.12323e-18	1.24242e-16	29.9193	DOWN	4.62071	4.49948	5.15485	4.94256	4.84748	4.78601	4.89467	4.59451	4.88544	4.355	4.43518	4.62681	4.55166	5.09538	4.46284	5.28876	4.46506	5.44872	4.16679	4.75549	4.61556	8.46558	9.15926	7.71888	7.00086	8.76462	7.39402	8.03301	8.18414	6.11414	5.97558	8.87565	9.42443	7.00269	7.99493	7.74122	7.66784	8.76798	8.38974	5.27421	10.0327	7.64286
CCDC85C	1.0448	5.73801	13.9901	7.1065e-28	5.98344e-26	52.7864	UP	6.30246	6.75607	6.54488	6.65606	6.33641	6.74355	6.53201	6.77675	6.37834	6.78258	6.74094	6.57396	6.78936	6.50036	6.76116	6.55356	6.49999	6.48721	6.65962	6.76208	6.81122	5.48333	5.43697	5.60623	5.61063	5.71145	5.3606	6.35116	6.51843	6.13006	6.19239	5.81481	5.25823	5.36855	5.17407	5.46039	6.53723	6.26208	5.87958	6.22562	5.82424	5.05799
CCL19	-2.79854	7.9732	-7.78166	1.80173e-12	1.38071e-11	17.6091	DOWN	4.72716	7.04376	9.0866	4.72333	6.13668	5.68654	5.39628	4.94878	5.55821	5.1917	4.31031	5.98706	5.08459	4.64122	4.9113	7.50469	4.31196	8.41945	4.76455	4.49352	5.08978	10.7695	8.42587	5.73139	7.40511	8.76418	8.47025	8.50676	10.9835	6.65297	8.46909	10.5376	9.8011	6.62899	7.07406	7.79449	9.24629	8.28938	9.17674	5.88052	9.63843	6.85308
CCL2	-1.61717	8.31667	-7.63992	3.87781e-12	2.81114e-11	16.853	DOWN	6.8266	7.26623	6.58768	6.91712	7.09657	7.36166	6.47524	6.47617	7.40534	6.07667	6.57765	7.41693	7.04754	7.06795	6.52902	7.48803	7.52707	7.89275	5.91893	7.42455	6.71247	8.65201	9.53721	8.06231	8.50362	8.67457	8.42946	8.71665	9.58612	7.53708	7.07094	9.78536	8.80856	8.02612	10.0223	8.69597	8.95996	9.12893	8.2321	7.13559	11.0846	7.72007
CCL21	-2.33059	7.02533	-8.47775	3.91507e-14	3.79821e-13	21.3912	DOWN	4.27568	5.7574	6.38506	4.66658	5.65916	4.97445	5.29876	4.81798	4.77453	4.59325	4.39891	5.14549	4.88166	5.38029	4.33845	6.69532	4.64829	5.94446	4.71136	4.26688	4.76175	8.68376	8.04115	5.52248	8.6082	7.89878	8.04413	7.52609	9.17924	5.77581	7.5945	9.6809	9.12574	5.80596	6.15915	7.24269	8.56529	8.68011	7.77793	5.50769	8.88039	6.65666
CCL28	2.00295	6.21273	8.10421	3.09443e-13	2.63826e-12	19.3482	UP	8.09859	7.58426	7.68338	7.92405	6.79224	7.44665	7.82415	8.07581	7.68705	7.94435	8.07652	7.78033	8.35152	7.97604	7.31874	7.97187	7.96729	8.13291	8.65565	8.43586	8.11044	5.00804	4.61673	6.69313	6.1389	4.80476	7.03514	5.07391	4.15702	8.24141	6.51101	4.32434	4.45889	6.62327	6.92759	7.25554	4.79064	6.04424	5.22118	6.7427	4.34682	5.56956
CCL3L3	-2.18492	7.1228	-7.83879	1.32104e-12	1.03265e-11	17.9153	DOWN	5.26129	5.26614	6.13753	5.00983	5.50461	5.45199	4.90692	5.30799	4.62162	5.17998	4.62685	6.34629	4.97175	4.79838	6.17347	5.1083	4.83516	6.66087	5.54923	4.696	4.58093	6.77778	7.85856	6.25962	9.21159	7.04661	7.22676	6.67572	8.6378	7.70163	5.58919	8.40916	8.73698	7.82791	7.42503	7.8748	7.48785	5.86329	8.72768	7.00738	7.44338	5.7416
CCL4	-1.58691	8.00195	-6.9777	1.29648e-10	7.54391e-10	13.3967	DOWN	6.89786	6.86161	8.05957	6.63494	6.71831	6.89346	6.12169	6.74566	6.9951	6.58876	5.42083	7.40212	6.28144	6.6611	6.16222	6.49768	6.46695	7.86478	6.82846	6.25821	5.65674	7.82898	9.42908	7.29646	9.87346	8.30398	8.3897	7.3719	8.64812	8.4646	6.81542	8.61773	9.65109	8.07268	7.60166	8.09524	7.58668	7.69363	9.42381	7.40344	9.18171	7.26476
CCL8	-1.38578	6.47423	-5.13912	9.66602e-07	3.10097e-06	4.68026	DOWN	4.81867	5.97121	5.16507	4.82021	5.90661	5.79588	5.01441	4.31363	5.59026	4.51389	4.7766	6.5045	4.75206	5.77215	4.72121	5.12042	6.59915	5.98009	4.54041	5.97021	4.84059	5.97718	7.47748	4.94229	8.33768	7.09619	6.61546	6.8043	7.1346	5.54446	4.59094	7.03103	7.45402	6.04446	7.58027	6.5167	5.3462	5.92402	7.2692	6.21947	9.00872	4.4094
CCND1	1.15652	7.50337	7.44399	1.10939e-11	7.53426e-11	15.8168	UP	7.90892	8.65116	8.62311	8.76065	8.16481	8.82775	8.91635	8.22707	7.98201	8.52628	9.07461	8.58965	8.09505	9.05996	8.78231	8.20922	8.61048	8.63913	8.10122	8.66343	7.58076	6.71018	6.44113	7.44482	8.63393	7.02516	7.45078	7.22445	7.14228	8.00221	8.3859	6.714	6.06317	8.97736	7.26298	6.6843	6.54336	7.09215	7.59638	7.27206	5.90721	6.20234
CCNDBP1	1.38715	9.19794	14.5734	2.63052e-29	2.87234e-27	56.0615	UP	10.1545	10.1049	10.36	10.4994	10.4388	10.3469	10.4045	10.7053	10.3774	10.7699	10.7036	10.509	10.1766	10.3172	10.6307	10.4619	10.1993	10.0325	10.0051	10.5627	9.89254	8.8515	8.69311	8.69519	9.33383	8.84137	9.67511	8.64876	8.93841	9.30105	9.54804	8.87102	9.027	8.39303	9.0564	8.29599	8.23208	8.55013	9.13099	8.9341	8.49194	8.78177
CCR1	-1.51572	6.81407	-9.71232	3.61567e-17	5.59842e-16	28.3088	DOWN	6.02195	5.46473	6.30647	5.10095	5.00639	5.71028	4.95888	4.98152	5.43036	5.21143	4.75046	6.28766	5.61239	5.28937	5.35783	5.82489	5.71187	6.62976	5.87058	5.07859	5.72288	6.9302	7.55236	6.24267	7.53825	7.08838	6.97331	7.00678	7.53732	6.74772	6.3455	6.67136	7.58521	6.41469	6.73364	7.46067	6.56955	7.05226	8.10495	6.47916	8.5883	6.05937
CCR7	-2.10971	5.8312	-7.85745	1.19352e-12	9.3892e-12	18.0155	DOWN	4.01095	4.35155	6.13622	3.83039	3.9355	3.61862	3.81594	4.01969	4.26111	3.36278	3.17656	4.66411	3.93375	3.65335	3.50186	4.81395	4.10127	5.21376	3.7345	3.47241	3.59141	9.27468	5.99984	5.73781	5.77553	6.10273	7.21605	5.23702	8.45092	6.13026	5.91026	8.07371	7.76563	4.76529	4.73306	5.25428	6.92281	6.10744	6.60877	4.9888	4.5789	5.10601
CD14	-1.80282	8.65773	-10.5028	3.81093e-19	8.07848e-18	32.8235	DOWN	7.01218	7.06104	7.94128	6.7911	6.97071	7.03423	6.73614	6.84103	6.96489	6.85289	6.74382	7.45618	7.11311	7.24951	6.81511	7.15497	7.18197	8.38398	7.31895	7.23053	7.12245	9.35751	9.73987	8.27687	9.44344	9.32018	8.95169	9.26514	10.0169	8.4794	7.77849	9.16457	9.45387	8.88257	8.77616	9.31642	8.87476	8.65653	10.746	8.17878	10.6316	9.34526
CD163	-1.27823	6.87733	-8.39559	6.18318e-14	5.82347e-13	20.9394	DOWN	5.65751	5.67256	6.72793	5.50451	5.67483	5.59345	5.53196	5.92381	5.7326	5.39844	5.40545	6.10199	5.41551	6.12321	5.64046	5.72521	5.5541	7.01664	5.67494	6.06323	5.71317	7.2309	8.49425	6.25835	7.18561	7.25443	7.27842	7.14666	6.51054	6.44063	6.07104	7.25425	8.31541	6.47143	6.75871	7.49105	6.02166	6.90398	7.73986	6.05772	8.57724	7.45135
CD200	-1.10874	6.24087	-6.68785	5.77631e-10	3.05577e-09	11.9285	DOWN	5.13139	5.1537	5.17044	5.25358	5.41751	4.94279	4.94972	5.03174	5.71855	5.26465	5.86635	5.50683	6.01242	5.6601	5.23667	5.69445	4.56395	5.34674	4.90706	5.95319	4.69708	7.49635	7.0455	6.04832	5.74349	7.2542	6.25244	6.63929	6.05752	5.42121	5.2555	8.16721	7.36086	5.96153	6.55034	6.71241	6.30587	6.82899	6.5602	5.55266	7.98352	4.78236
CD248	-1.96494	8.06406	-11.1439	9.3051e-21	2.50425e-19	36.508	DOWN	6.56929	5.93018	6.161	6.98005	6.2878	6.49611	6.20386	6.33308	6.1491	5.971	6.35991	6.09393	6.59442	6.78857	6.35865	6.88951	6.87918	6.52441	6.52671	6.51173	6.03775	8.16616	9.58005	8.7984	8.18821	8.99183	8.51984	9.18609	9.53293	7.84806	7.3423	8.97192	8.76118	8.48158	8.79706	9.47617	10.5861	9.21231	9.24176	7.89619	9.71165	8.04476
CD2AP	1.05456	6.46502	11.009	2.03321e-20	5.17938e-19	35.7321	UP	7.4901	7.42123	6.99586	7.41865	7.06211	7.33085	7.20623	7.09727	7.30835	7.62634	7.31234	7.26245	7.36381	7.29151	7.5404	7.28051	7.39448	7.11795	7.81725	7.31009	7.74023	5.69883	5.7429	6.28689	6.84203	5.76591	6.53384	5.64023	5.06892	6.58602	6.63646	5.79182	6.06538	6.04913	5.9579	6.41954	4.88888	6.23107	5.53682	5.76945	5.43665	6.0211
CD300LF	-1.04508	6.06567	-7.14825	5.31488e-11	3.25999e-10	14.2739	DOWN	5.21034	5.39836	6.32002	4.88033	4.59701	5.29213	5.05903	5.19526	5.09127	5.03506	4.58928	5.05129	5.15831	5.54026	4.81624	4.79302	4.95012	6.52905	5.18966	5.01225	5.21561	6.68676	6.46687	6.69153	7.47221	6.04792	6.4687	5.90869	6.62862	6.50868	5.36906	6.06534	6.71515	5.72755	5.61738	6.41558	6.01497	5.56727	7.92285	5.94227	5.87614	5.53078
CD34	-1.20081	7.2617	-7.23634	3.34169e-11	2.11402e-10	14.7307	DOWN	5.49064	6.17089	6.37218	6.55013	6.92921	6.41697	6.36742	6.1921	6.64664	5.80488	6.1555	6.04863	5.86582	6.29498	6.01652	6.70543	6.33671	6.58875	5.97001	6.47234	5.89489	7.4209	8.55918	7.36101	6.95787	8.07361	7.66416	8.10532	8.15015	6.7258	6.85225	8.1983	7.64789	7.16846	8.12296	7.97577	8.36049	7.75334	8.00055	7.16854	8.66803	10.8845
CD37	-1.59321	5.1697	-13.7383	2.97402e-27	2.28701e-25	51.3641	DOWN	3.91708	4.02058	4.63985	3.53392	3.79386	3.52429	3.58316	4.01104	3.89501	3.66514	3.69823	3.66355	3.72978	3.65803	3.6828	4.07655	3.67458	4.01558	3.89853	3.78465	3.96295	6.36232	5.71325	5.10115	5.3196	5.54906	5.69711	5.21423	6.43374	5.03806	5.07654	6.16818	5.73051	4.84738	4.92129	5.3054	6.33397	5.18579	6.24456	4.85702	5.16716	4.80008
CD3E	-1.48298	6.31388	-10.8254	5.89064e-20	1.39545e-18	34.6762	DOWN	5.06085	5.16054	5.47137	5.33033	5.01997	5.51293	5.0492	5.51439	5.32524	5.21864	4.59818	5.05789	4.90959	5.06813	4.9625	4.82121	5.27951	4.2338	5.20351	4.83758	4.76794	7.89828	6.50463	6.26557	6.75483	6.66258	6.92001	6.5506	7.77823	6.44667	6.62815	7.00857	7.07966	5.86735	5.96745	5.71359	7.24614	6.18027	6.91861	6.29263	6.39245	5.96015
CD69	-1.11255	6.10962	-4.38455	2.34736e-05	6.01324e-05	1.60448	DOWN	5.86607	5.17083	6.41808	4.53118	4.84085	5.26619	4.15637	5.14353	5.14365	4.83198	4.01169	6.55635	5.33601	5.48716	4.59844	5.34908	5.01854	5.70917	5.65751	5.1712	4.39166	8.14013	6.03072	4.55408	6.51313	6.63854	6.63352	4.98753	7.54	5.60231	5.52902	7.69122	6.63831	4.81954	5.48362	5.25288	3.25529	6.29675	5.96482	3.66187	7.38712	5.55374
CD72	-1.28596	5.22552	-6.70705	5.23645e-10	2.78423e-09	12.0248	DOWN	3.73655	4.16683	6.36539	3.93447	3.97547	3.62331	4.13033	4.34018	4.15668	3.84722	3.63214	3.83757	3.93484	3.89087	3.7811	4.07916	3.87483	5.92224	3.88142	4.17126	3.74519	6.31492	5.20934	5.3352	5.51354	5.68331	5.64517	4.95384	6.63559	4.70378	4.50666	6.26711	5.98198	4.90048	4.4958	4.95586	5.49504	5.13079	6.776	5.12963	6.06647	5.29033
CD74	-2.21329	8.63606	-21.1442	2.74125e-44	2.73668e-41	90.2825	DOWN	6.73313	6.84812	7.6266	6.62229	6.69245	6.6775	6.40666	6.78041	6.70101	6.6835	6.54949	7.27636	6.6567	6.60402	6.55189	6.46872	6.41871	7.72501	6.83437	6.49143	6.92436	9.36802	9.50775	8.63292	9.97976	9.44975	9.58049	9.13583	9.49917	8.89531	8.51396	8.85273	9.14766	8.84848	9.50284	9.33342	9.70014	9.07784	9.60414	8.68894	9.54892	9.02724
CD79A	-1.0635	7.16884	-4.44409	1.84691e-05	4.80916e-05	1.83437	DOWN	6.92111	6.46666	7.24055	6.47502	6.08281	6.69589	6.34849	5.72253	6.06747	5.66017	5.96387	5.49066	6.86888	5.96226	5.78303	6.15859	6.56305	6.98866	6.16759	5.75537	6.38254	8.17077	7.09811	7.1273	6.80797	7.04532	8.76986	6.8083	8.69858	7.16273	7.34719	8.51651	7.50079	6.14535	6.03253	6.61104	8.35447	7.57059	7.64823	6.6216	6.03036	6.63676
CD83	-1.20208	7.09711	-8.07411	3.65084e-13	3.08628e-12	19.1849	DOWN	5.83654	6.42031	7.3286	5.78351	5.95431	6.26268	6.06096	5.82157	6.04504	5.59128	5.80492	6.54802	5.87042	5.95482	5.79304	6.3305	5.90552	7.01154	5.99942	5.69273	5.79576	7.6955	7.47545	6.93615	7.75216	6.91441	7.13885	7.00844	7.6492	7.16029	6.69924	8.39332	7.19694	7.45399	6.50727	7.0709	7.01435	6.92587	7.71754	7.35876	7.29073	7.10735
CD86	-1.26071	6.18174	-9.959	8.77183e-18	1.49635e-16	29.7129	DOWN	5.44766	4.99514	6.0888	4.64307	4.63866	5.02897	4.78326	4.99703	4.81309	4.6214	4.77605	5.48105	5.15873	5.21698	4.99204	5.15188	5.38659	6.01844	5.20984	4.93117	5.17366	6.61529	6.6673	5.97841	6.85609	6.72203	6.15415	6.1109	6.58388	6.20368	5.77003	6.45645	6.69009	6.20159	5.76297	6.41035	5.55049	6.11305	7.58518	5.73411	6.99739	5.94681
CD93	-1.30962	8.06024	-8.25762	1.32822e-13	1.19358e-12	20.1837	DOWN	7.1844	7.00833	7.09685	6.9489	6.80696	7.12066	6.88158	6.85912	6.82508	6.49897	6.71793	6.83031	7.03577	7.11704	6.57206	7.25892	6.85801	7.49881	6.92125	7.12364	6.97374	8.23852	9.41583	8.05879	7.52578	8.87994	8.595	9.17354	8.27017	7.59743	7.40547	9.45588	9.08152	8.24332	9.09377	9.20913	8.36584	8.4841	8.46723	7.84409	9.57245	8.02376
CDC42BPA	1.09482	6.49633	11.5018	1.16777e-21	3.62702e-20	38.5686	UP	7.03943	6.84443	7.36504	7.78548	7.20765	7.74465	7.70499	7.53417	7.24618	7.44951	7.81847	7.16958	7.20392	7.6921	7.71914	7.46982	7.37297	7.5558	7.20764	7.61704	7.00849	6.0294	6.1804	6.03178	5.43741	6.26806	6.36314	6.23459	5.67146	6.51807	6.6709	6.0936	6.3639	6.50135	6.42143	6.22065	5.53361	6.27086	5.98624	5.81175	6.15552	6.48875
CDC42EP1	-1.37006	7.3886	-9.45776	1.55054e-16	2.20387e-15	26.8661	DOWN	5.90933	5.96929	6.24677	6.48268	6.24201	5.98094	6.42585	6.2228	6.28711	6.37842	6.31028	6.38143	5.98777	6.40588	6.14972	6.25396	6.38028	6.71534	5.80696	6.55009	5.87983	6.71109	6.62386	7.72611	7.91646	7.77677	8.61991	7.38416	8.04415	8.51727	8.44428	7.13127	7.24092	8.3739	7.88644	8.05116	8.62265	7.81565	7.13686	7.90647	7.00717	7.88327
CDC42EP3	-1.0351	7.15151	-4.94543	2.25941e-06	6.84319e-06	3.85828	DOWN	6.21028	5.94545	6.58411	6.59097	6.33463	6.34017	6.14567	6.04113	6.66185	6.04134	6.23697	6.40557	5.91428	6.71965	5.89565	6.66084	5.99975	6.59876	5.71453	6.81765	6.04342	8.61916	7.99571	6.01172	6.39492	7.50901	6.86157	7.95384	8.31939	6.43082	6.48884	8.01719	8.80576	6.9117	8.10433	7.95342	7.22623	8.04978	8.05338	6.02386	8.9557	6.35704
CDH11	-1.73019	6.98549	-8.35588	7.7079e-14	7.1566e-13	20.7215	DOWN	5.53949	5.60694	5.75481	5.42567	5.35211	5.56786	5.34257	5.53157	5.65973	5.23749	5.34024	5.58541	5.72938	5.81616	5.24221	5.75051	5.68842	5.76726	5.23046	5.63126	5.34199	8.30785	7.45131	7.89707	7.15771	7.76279	6.68019	7.26069	7.38816	7.01419	6.00547	8.28603	9.14442	7.6129	7.90311	7.96782	6.40976	7.45663	7.52352	5.65699	7.88859	8.61325
CDH13	-1.07612	4.56744	-9.05229	1.55367e-15	1.87517e-14	24.5837	DOWN	3.67039	3.75421	3.91986	3.95785	3.05525	3.77316	3.92112	3.29288	3.62873	3.76843	3.74242	3.08956	3.72837	3.62785	3.91612	3.74636	3.95005	3.99071	3.27788	3.65276	3.44903	4.41808	4.61574	4.89791	4.25081	5.10072	3.89609	5.87884	4.87296	4.45342	4.61482	5.28942	5.44541	4.51294	5.68614	5.58937	4.91902	4.57888	5.11306	4.79043	5.27065	4.04657
CDH3	-1.17493	6.60209	-4.68711	6.7911e-06	1.90342e-05	2.79617	DOWN	7.2988	6.6888	5.30703	5.27399	4.79172	4.80413	6.26769	5.15734	5.36407	5.03932	4.87873	4.64929	5.16533	4.75613	4.93858	5.38423	7.1373	4.8994	7.589	4.81987	7.68489	8.19269	6.99187	8.26602	8.43592	7.73982	5.36407	6.4146	8.92205	6.42569	7.14433	6.71889	7.32588	7.01965	7.35992	6.73462	7.03131	6.47086	6.46685	8.86926	6.02998	5.13802
CDH5	-1.3516	6.69121	-7.14521	5.40054e-11	3.31059e-10	14.2582	DOWN	5.52343	5.04876	5.71541	5.57517	5.71528	5.7441	5.75004	5.18469	5.65377	4.82439	5.42463	5.62721	5.69364	6.11011	5.01605	5.91406	5.51944	5.90225	5.30868	5.86526	5.53097	6.49019	8.02408	6.71675	6.30761	7.26648	7.09401	7.8828	8.30038	6.11261	6.10739	8.04247	7.68802	6.65849	7.84397	7.77527	8.60033	7.04972	7.42093	6.60707	8.62069	6.51041
CDHR2	2.21228	7.36309	9.06396	1.45437e-15	1.76656e-14	24.6491	UP	10.097	9.85952	9.13493	8.51067	7.77382	8.75188	9.37133	9.43805	8.06685	9.63407	8.85848	8.33508	10.4019	8.64436	9.58366	8.59482	9.37126	8.07743	11.1393	9.07654	10.9707	6.59233	6.11246	8.27986	6.49782	6.27664	7.17375	6.60844	6.41166	8.24017	8.75028	6.43351	6.50824	8.25122	7.25465	7.53159	6.7782	7.80973	6.33232	8.5635	6.16259	6.34286
CDS1	1.60877	6.60574	8.48799	3.69802e-14	3.59596e-13	21.4476	UP	8.07257	8.0041	7.67583	7.85342	7.53818	7.91801	8.16822	8.06674	7.76231	8.18283	8.11127	7.90739	8.04625	7.90595	8.09948	7.83632	8.00211	7.64068	8.29022	7.80703	8.24112	5.96652	5.31582	7.09552	6.36798	6.09854	6.74046	6.83791	5.88267	7.29284	7.67	5.50102	5.51267	6.31896	6.15353	6.78933	4.9404	6.17494	5.45786	7.00911	4.1913	6.26948
CEACAM5	1.33956	7.94183	4.7472	5.27474e-06	1.50614e-05	3.03968	UP	9.0382	9.0764	9.4144	8.92806	8.55474	9.04909	9.04553	9.04314	8.7894	9.11782	9.17209	9.20396	9.08356	9.0115	9.12897	8.95401	9.25687	8.70149	9.36794	9.1052	9.39149	9.01393	6.59806	9.19375	8.17108	7.18206	7.81459	8.02019	8.45611	8.54949	8.96768	5.29037	9.01258	7.97049	8.22953	7.93441	5.97209	7.74906	8.93902	8.06176	4.74426	5.77281
CEBPB	-1.34856	10.6944	-11.1975	6.81972e-21	1.88126e-19	36.8164	DOWN	9.43296	9.19869	9.87791	9.26722	8.80679	9.71422	9.31075	9.56132	9.05219	9.6425	9.22736	9.8804	9.80374	10.2099	9.60971	9.54781	9.79006	9.91762	9.72237	9.81691	9.37735	10.3829	11.476	10.7431	11.5645	11.5058	10.9376	10.3685	11.3447	10.6849	10.1166	11.2984	11.4679	12.1212	11.5659	11.8556	10.9265	11.2117	11.3679	11.6934	11.9447	10.559
CEBPD	-1.42392	7.62385	-10.7232	1.06441e-19	2.42823e-18	34.0891	DOWN	6.43008	6.54003	6.36541	6.04577	6.3657	6.54392	6.32508	6.59639	6.35718	6.33743	6.38838	6.60388	6.27105	6.17173	6.16732	6.07809	6.5892	6.53874	6.94332	6.55825	6.73881	7.66709	8.82088	6.92175	8.43803	8.61948	8.43856	7.61331	8.58119	7.67487	7.22864	8.98227	8.28903	8.18806	7.9437	7.6153	7.38978	8.45159	8.60051	7.04397	9.66135	8.92251
CEMIP	-1.61778	5.63051	-8.66834	1.35014e-14	1.41387e-13	22.444	DOWN	4.81766	4.55942	4.33237	4.0285	4.1008	4.22339	4.0634	4.04269	3.8203	4.16313	4.40703	3.89345	4.03068	4.01547	4.49635	4.3794	4.88143	4.3459	4.49357	4.01189	4.56552	5.7327	7.21075	7.0281	6.74807	6.65747	5.84546	5.1436	6.87432	6.48593	5.15868	6.90126	6.55208	6.19641	6.45024	5.63101	6.28041	4.80681	4.97501	5.97192	5.85064	5.0696
CENPB	-1.49613	7.22095	-15.4641	1.82517e-31	2.92097e-29	60.9994	DOWN	5.98823	5.75972	5.66181	5.78677	5.78261	5.80352	6.06982	5.93669	5.71553	5.84327	6.08682	5.99485	5.99557	6.36489	6.03842	6.06722	6.14014	6.08503	6.10439	6.0784	5.91595	7.15187	7.27727	7.68816	7.57896	7.22449	7.28146	7.80329	8.2189	7.30833	7.18814	7.42476	7.50329	8.10361	7.62132	7.1486	8.95455	7.80793	8.32778	8.29333	7.69484	7.94822
CENPK	1.03595	5.94213	4.65067	7.90753e-06	2.19114e-05	2.64961	UP	7.20251	7.72191	6.83627	5.19216	6.32326	6.96578	7.33266	6.80767	6.71901	7.36602	7.11441	6.99683	6.47211	6.64152	7.68491	6.64565	7.29194	7.36885	5.32704	6.19654	6.87157	6.55597	5.49469	6.12275	6.92665	6.03009	5.00667	4.94098	5.96448	6.06191	6.28846	5.76909	6.14764	6.28515	5.43513	5.52413	2.74031	5.3341	5.2804	5.74213	4.64306	5.51974
CENPV	1.36715	6.52546	9.08447	1.29496e-15	1.58765e-14	24.764	UP	7.65057	7.6678	7.44907	7.62617	7.37826	7.84519	7.97953	7.93468	7.54465	7.6889	7.8449	7.68393	7.5903	7.89528	7.80694	7.62846	7.53833	7.46277	7.51194	7.79401	7.65551	4.24757	4.25879	6.66337	6.80282	5.91115	6.40031	6.7703	6.67782	6.83336	7.35487	5.88685	5.70969	6.41588	5.70127	6.56913	6.11843	6.05754	6.05363	6.94055	5.21513	5.77226
CEP170P1	-1.06377	6.77561	-11.3567	2.70964e-21	7.94512e-20	37.7328	DOWN	5.90095	5.74812	6.09665	5.80436	6.20534	5.77943	5.83484	5.79453	6.10064	5.76795	5.73063	5.80489	5.83017	5.96437	5.75516	6.00854	5.93588	6.01421	5.69462	5.94084	5.79053	7.41078	6.91433	6.39212	7.83946	7.21407	6.55864	6.5291	6.54617	6.43352	6.16014	7.55782	7.30895	7.07161	6.91223	7.27408	5.93963	6.92158	6.82903	6.27104	7.47833	6.91532
CES2	1.74989	9.11334	6.76827	3.82677e-10	2.07992e-09	12.3329	UP	11.5558	11.5052	10.4205	9.42095	8.99429	10.4343	10.9235	10.3859	9.63707	10.6816	10.4849	9.88908	11.6594	10.0305	10.8164	10.3879	10.6817	9.73052	12.3192	10.0832	12.2395	8.48264	8.58354	10.8392	7.55588	8.06404	8.3768	10.0644	7.97492	8.33481	10.3078	7.87581	7.24963	9.28867	9.00147	7.2986	8.38764	9.66842	7.61591	9.87411	7.35366	7.96868
CFAP44	1.85884	4.903	16.6416	2.90846e-34	7.52788e-32	67.3965	UP	6.40863	6.28674	6.22154	6.31483	5.64964	6.81478	6.48345	6.83188	6.28171	6.51776	7.16181	6.89075	6.33863	6.64564	6.60071	6.3938	6.48607	6.08825	6.12367	6.64158	6.60654	4.64027	4.21253	4.97825	4.83534	4.53848	4.49745	3.84716	3.94292	5.0661	4.88048	4.37158	4.89663	5.90287	3.84784	4.66675	3.88916	4.44312	4.00305	4.12543	4.34826	4.11204
CFHR1	-1.02287	8.93247	-4.88143	2.97781e-06	8.85026e-06	3.59147	DOWN	7.5933	7.94317	8.98042	7.97843	8.30593	8.13927	8.01993	7.58252	7.5666	7.58515	7.83503	8.68916	7.98516	8.46415	7.43031	8.6456	8.22628	9.08041	7.37684	8.11583	7.97544	8.93095	9.63065	8.33619	8.36692	9.96441	9.23825	8.60032	8.7958	8.05874	8.82368	10.127	9.49951	9.97165	8.77044	8.14653	6.98979	9.53883	8.02315	6.34365	10.0315	9.90124
CFL2	-1.62617	7.37685	-5.95651	2.18714e-08	9.07271e-08	8.36847	DOWN	5.84266	5.73126	6.06175	5.97122	6.43753	5.98216	6.0723	5.93121	5.97006	5.92411	6.17508	6.23135	6.00758	6.32758	5.82866	6.41754	5.81489	6.12742	5.28944	6.31409	5.73914	7.97539	8.85077	5.7142	7.20987	8.25869	6.98742	8.76589	9.46655	6.30717	6.68736	8.97169	7.52469	6.94216	7.92001	7.66223	7.61753	9.02016	9.35891	6.39443	10.0515	7.05822
CGN	1.44032	7.41613	5.42083	2.71566e-07	9.45586e-07	5.91283	UP	8.84569	8.539	8.68455	8.26721	8.30183	8.70655	8.70748	8.71586	8.26576	8.64167	8.33885	8.52023	8.82696	8.43429	8.65352	8.74707	8.80621	8.66368	9.38704	8.25387	8.86602	7.15633	6.20506	8.3021	6.67715	6.56079	7.13541	7.22207	6.41619	7.86726	8.20174	6.05064	7.65673	9.76488	9.30957	7.8023	6.1435	7.84319	6.15451	9.28028	3.85588	6.23606
CH25H	-1.90068	6.08387	-9.29586	3.90057e-16	5.202e-15	25.9523	DOWN	4.19296	5.04049	4.86465	4.12945	4.17801	4.21063	4.88844	3.90891	4.50419	3.40234	3.69629	3.73955	4.3294	5.16327	4.02801	5.58937	4.84037	5.20934	4.6568	4.74973	4.87496	6.93863	6.65428	6.18784	4.95589	7.76073	6.92888	6.08398	7.95752	5.75094	6.00971	8.3308	5.9864	5.25612	6.66731	5.76118	6.34089	7.37144	6.10988	4.58922	8.1279	8.21979
CHAC2	1.44119	6.51996	6.81296	3.04129e-10	1.67747e-09	12.5586	UP	7.93649	8.28084	7.46931	7.31443	7.46171	7.56891	8.00623	7.24234	7.37713	8.17487	7.98181	7.4467	7.78542	7.62887	8.02938	7.48621	8.38275	7.35982	7.51042	7.43168	8.4939	5.24962	4.23701	7.29512	6.81809	6.26793	6.55672	5.6753	6.60012	6.80018	7.03434	5.48984	6.24754	5.56145	5.05099	5.49179	2.9615	6.2259	6.18926	6.81809	5.1166	5.69624
CHGA	1.18916	7.14034	3.47829	0.000683237	0.00137283	-1.59337	UP	8.2434	7.90848	7.92375	8.64625	8.65295	8.17681	7.60195	8.21661	8.73433	7.96319	8.20314	8.01844	7.74883	7.79188	8.01434	8.27268	7.90099	8.72116	7.9444	8.30772	7.95537	6.01417	5.6878	6.06329	5.73248	6.25726	8.55685	7.6047	6.7211	7.70803	8.06154	6.60206	6.34735	5.38237	5.99676	6.31081	7.05588	7.21548	6.0547	7.26488	6.13066	9.81452
CHGB	4.65754	5.26959	12.7935	6.66563e-25	3.62974e-23	45.9868	UP	9.19638	6.85643	9.44533	7.50908	8.60475	10.1187	10.402	8.72038	11.2834	10.1426	10.9205	8.66358	9.51749	9.73271	9.72811	9.96227	8.39342	10.4871	5.93293	10.9256	6.36655	3.54762	4.22032	3.53602	3.62704	4.10183	4.09644	4.37301	4.87729	4.09638	7.76816	3.23203	7.64023	4.4046	4.09441	4.03944	4.4947	4.86331	4.3017	3.78646	4.67167	5.33249
CHI3L1	-2.85215	6.03894	-9.80887	2.07826e-17	3.33442e-16	28.8577	DOWN	4.0745	3.26087	4.53596	3.34497	3.47249	3.21023	3.40384	3.32297	3.2418	3.29234	3.20211	3.12332	3.43603	3.3767	3.99889	3.17307	4.29702	5.57713	4.46391	3.2421	3.4011	5.77744	9.19171	7.10799	7.69271	6.44909	7.36741	7.35368	7.87049	6.77312	5.41219	8.44969	7.88968	4.80253	6.08273	6.62752	7.71916	4.73072	8.76112	6.69595	8.23754	6.9691
CHI3L2	-1.33091	5.26983	-5.46681	2.19919e-07	7.77112e-07	6.11799	DOWN	3.91911	4.18476	5.8524	4.04811	4.01945	4.13901	3.77075	4.35433	3.92412	4.07491	3.98479	4.48696	3.70498	3.93538	3.90992	3.91898	4.27712	5.23336	3.97815	3.77851	3.66879	5.88404	8.39277	4.71219	4.88631	4.43222	5.60813	5.69374	6.87762	4.88826	3.96492	8.22378	6.15965	5.4374	5.034	4.7928	5.74879	4.67088	5.16089	7.04012	5.37084	4.82866
CHKA	1.14051	7.10842	10.2354	1.78537e-18	3.41829e-17	31.2915	UP	7.94113	8.13718	8.06442	8.10555	7.85808	8.04375	7.96825	8.14541	8.12495	8.26321	8.01912	7.73489	8.13695	7.78094	8.08025	8.15889	8.16082	7.97045	8.34582	8.203	8.17415	6.57692	6.03338	6.54001	6.6672	6.71889	7.3234	6.94481	6.18408	6.99536	7.27498	6.37118	6.13838	7.79852	7.56311	6.88129	6.36579	7.14439	6.73669	7.46847	6.06741	7.09259
CHMP2A	1.02907	9.96857	14.5493	3.01334e-29	3.25643e-27	55.9265	UP	10.8206	10.8887	10.918	10.6545	10.6223	10.8755	10.9525	11.02	10.6831	10.9415	10.9846	10.966	10.7198	10.7445	10.9245	10.6693	10.8493	10.6875	11.0602	10.8634	10.6667	9.32495	9.67334	10.0001	9.28886	9.4036	9.89655	9.59576	10.2967	10.0865	10.5464	9.734	9.69402	9.98621	9.90929	10.0032	9.42576	10.1959	9.84392	9.25822	9.45009	9.61669
CHMP4C	1.96195	7.80762	6.9383	1.59103e-10	9.15616e-10	13.1954	UP	9.60918	9.13671	9.11399	9.39105	9.37615	9.39525	9.38322	9.68565	9.44823	9.79502	9.59547	9.62978	9.53046	9.31144	9.63487	9.36473	9.35441	9.14833	9.57251	9.61904	9.51088	7.25012	5.73331	7.88068	8.887	7.78034	8.01248	7.42962	6.41447	8.37875	8.60434	7.03811	6.47766	7.56887	7.16849	6.18537	5.47369	7.47954	6.8586	7.67563	3.01163	6.47921
CHMP5	1.01369	9.34306	9.62399	5.99636e-17	9.0182e-16	27.8075	UP	10.1454	10.0404	10.2344	10.2402	10.0819	10.191	10.0924	10.4014	10.0746	10.2175	10.4338	10.5347	10.1954	9.97029	10.3171	10.1724	10.0993	9.76882	10.3692	10.4077	10.1173	9.03107	8.79784	8.88897	10.0331	8.8188	9.06852	8.94806	9.13128	9.25319	9.63201	9.09493	8.69062	8.78514	8.95225	8.65684	6.47395	8.88756	9.16168	8.97729	8.9046	8.50511
CHN1	-1.67915	7.52795	-10.4297	5.81435e-19	1.18578e-17	32.4044	DOWN	6.64762	5.75091	6.0856	6.50897	6.51018	5.47189	6.10428	5.98961	6.33553	5.77831	6.1434	6.28556	6.06255	6.14335	5.85157	6.332	6.05504	6.10109	5.82519	6.47088	5.98111	7.6384	8.4457	7.74386	7.54133	7.92142	7.00881	7.89108	7.76194	7.24998	6.69841	8.64975	8.45378	7.20823	7.43255	8.07937	7.59961	7.74996	8.45608	7.16081	8.40925	10.4091
CHPF	-1.06277	6.6237	-11.3581	2.68768e-21	7.89177e-20	37.7409	DOWN	5.6033	5.50207	5.81788	6.18281	5.65118	5.67467	5.85475	5.57059	5.72291	5.80186	5.84623	5.62888	5.67908	5.60938	5.79101	5.60588	5.6584	5.88465	5.76837	5.86616	5.6101	6.60508	7.05701	7.75055	8.41966	6.58988	7.12922	6.76096	7.14202	6.66072	6.56397	6.54395	7.29599	6.74133	7.28829	7.22589	7.84871	6.48098	6.72849	7.7315	6.49269	7.417
CHPT1	1.58267	7.22134	11.2287	5.68982e-21	1.58627e-19	36.9963	UP	8.27911	8.3352	8.5011	8.21734	8.58702	8.48348	8.47702	8.66792	8.50895	8.714	8.83775	9.00641	8.64982	8.55529	8.60716	8.28014	8.42366	9.03137	8.05043	9.0211	8.36246	7.1057	6.18521	6.9362	6.41905	6.77523	7.37043	6.95442	5.98888	7.29903	8.3505	6.53573	7.06471	8.68489	7.81006	6.29108	5.29773	7.00862	6.42162	6.68233	6.30556	7.08877
CHRDL1	-1.95779	6.51328	-5.02499	1.59797e-06	4.96391e-06	4.19336	DOWN	4.10981	3.94698	5.76143	5.23113	5.41794	3.84172	5.44944	5.11321	4.38083	4.51895	4.18005	5.04051	4.64027	6.6271	4.25116	6.75717	4.55888	4.82071	3.35881	5.25157	4.94859	8.90442	7.9266	5.90492	4.03625	8.93264	7.01657	6.74299	6.91422	4.90282	6.57869	9.23801	7.79549	5.79644	6.10951	5.9302	6.8227	7.67324	6.88198	4.9328	9.85589	9.04856
CHRDL2	-3.15323	6.99411	-8.8514	4.82885e-15	5.41461e-14	23.4613	DOWN	4.32805	3.9104	4.70024	4.49724	4.03449	3.95242	4.60425	4.45789	4.59762	4.43863	4.58125	4.56445	4.35954	4.40074	4.10236	4.12364	4.393	4.69232	4.60896	4.25329	3.59223	7.50124	11.04	7.62242	6.84534	9.40199	8.69357	9.87683	9.63042	6.64805	5.19363	10.275	7.50464	6.57337	9.2171	7.73819	11.1618	9.10833	9.85829	4.76237	10.3245	6.30729
CHUK	1.13972	6.95287	9.96745	8.35589e-18	1.43005e-16	29.761	UP	8.37652	7.79511	7.7608	7.64478	7.67872	7.71719	8.0105	8.0829	7.61895	8.01249	7.9335	7.84264	7.8715	8.0009	7.9122	7.78675	8.21314	7.72129	8.16962	7.95639	8.03093	6.36919	6.17136	7.73499	7.08775	6.65374	6.92882	5.938	5.93279	6.8489	7.33973	6.58365	6.22929	6.51391	6.91124	6.26789	4.48653	7.16887	6.47691	6.94638	6.43135	6.53304
CIART	-1.04083	5.38994	-7.12079	6.1392e-11	3.74044e-10	14.132	DOWN	4.00473	5.47636	4.31066	4.40572	4.75492	4.5739	4.21029	4.53413	4.36652	4.77281	4.35399	3.88005	4.45627	3.86625	4.47472	4.52329	4.41743	4.13119	5.33074	4.3226	5.64211	5.19362	5.66182	5.34001	4.62312	4.97351	5.40177	5.65866	5.45226	5.0658	4.85218	5.28522	5.7894	5.76933	6.31178	4.96668	5.97379	5.94977	5.41081	7.07588	6.15505	5.07544
CIDEC	1.86372	6.3552	9.26463	4.65861e-16	6.11954e-15	25.7764	UP	8.32644	9.07385	6.99169	6.58892	6.49289	7.70998	8.61658	8.85911	6.80411	8.63849	8.17247	6.65164	8.84154	7.78284	8.3578	7.30053	7.57855	6.86701	9.33258	7.95061	9.43307	5.51501	5.92048	7.1574	5.42482	5.34794	6.20363	5.73905	5.65047	6.46778	7.55751	5.22242	5.13477	6.13782	5.17658	5.62213	6.44184	6.63321	5.76895	7.59378	8.09731	5.44773
CILP	-2.35079	7.35852	-7.88399	1.03288e-12	8.22418e-12	18.1581	DOWN	5.25241	5.86919	5.53914	5.66654	5.37918	5.74405	5.4314	5.0359	5.33876	5.40648	5.32502	5.39585	4.96129	5.34174	5.75862	5.43356	5.47081	4.71698	5.0811	5.25375	5.61434	8.30515	8.23658	6.03814	8.74863	8.04039	7.15306	8.81559	9.02391	6.31616	6.84709	9.39102	8.73959	7.16112	7.83742	7.73495	8.82649	7.53699	8.64765	5.47685	9.85637	8.69147
CITED2	-1.0236	6.3265	-10.431	5.77063e-19	1.17939e-17	32.4119	DOWN	5.51255	5.59567	5.39159	5.51648	5.30198	5.42017	5.30027	5.42763	5.3356	5.67638	5.45873	5.28492	5.81091	5.4284	5.39083	5.23716	5.29491	5.30718	5.74456	5.50154	5.84331	7.12285	6.92732	5.97583	6.96901	6.41504	6.57481	6.39097	7.16549	6.00755	6.30546	7.09001	6.76854	5.88047	5.92287	6.0621	6.85453	6.94801	7.03583	6.11519	7.47226	7.31651
CKMT1A	1.57846	8.71931	4.83637	3.61195e-06	1.05834e-05	3.40503	UP	10.5796	10.4886	10.03	8.73538	9.46629	9.52641	10.5806	10.1676	9.65629	9.97139	9.96479	9.77377	10.2342	9.83644	10.2316	9.6662	9.80627	10.3935	11.0228	9.88143	10.9665	9.28663	8.05292	10.9173	4.68368	8.95805	9.24267	8.47627	9.1027	10.2969	9.96224	6.80632	9.39181	7.28651	9.66	7.73334	8.18501	8.68262	8.62714	9.74686	5.02377	7.2578
CLCA1	1.58488	5.66367	2.89524	0.00443276	0.00768104	-3.32443	UP	9.32012	10.4582	3.82494	4.134	4.58695	4.21916	8.2362	3.97584	5.04141	7.47069	6.63473	5.45466	12.0809	4.68213	6.27252	8.49156	8.70572	4.79155	10.8725	5.74422	11.9266	9.29057	4.3047	4.61608	4.27598	4.48308	4.31104	8.868	4.78491	4.28517	8.74715	3.8952	12.7316	3.67871	4.80451	3.65939	4.52145	8.6488	6.65488	5.77476	3.6999	4.62611
CLDN1	-1.63286	6.09136	-6.38312	2.69223e-09	1.28542e-08	10.4185	DOWN	6.21718	5.34207	5.33357	3.72074	4.19877	4.04868	5.23167	4.32159	3.70049	4.61931	4.4189	4.34752	4.25572	3.80799	4.72371	4.95928	4.77525	4.45937	5.57626	4.4808	6.54481	6.74174	6.49415	7.22375	9.4606	6.58575	4.87763	4.97568	6.44511	6.66132	6.67698	6.35025	6.03004	9.40537	5.77503	6.15075	5.49386	6.06271	6.83507	3.82239	4.51008	5.61854
CLDN18	2.45038	9.65791	4.67517	7.13886e-06	1.99395e-05	2.74807	UP	11.3817	11.8236	12.0852	11.5022	11.5237	11.869	11.7342	12.2011	11.7856	12.156	11.8952	11.9614	11.442	11.9811	12.002	11.8668	11.6861	11.5579	11.1144	11.8892	10.629	7.23186	4.2175	9.70646	5.13634	9.46416	11.7201	8.71224	8.17797	11.6846	11.6551	9.28017	7.51555	10.2555	9.77004	10.6593	6.9629	10.4022	7.69964	8.7843	4.06949	10.4766
CLDN23	1.89343	6.12147	8.40633	5.82492e-14	5.50335e-13	20.9984	UP	8.95262	7.94057	7.44007	7.04441	6.91565	7.16433	8.3963	7.65392	7.06539	7.75013	7.49861	8.21698	7.38331	7.72501	7.43045	7.51891	7.67762	7.27737	9.66083	7.50293	7.77183	4.4663	4.61421	5.84449	5.61563	5.24945	6.48864	6.89744	5.094	6.53235	6.98388	5.25881	5.29944	5.45395	5.88833	5.54281	4.59189	6.66131	5.07107	6.83231	4.21248	5.17589
CLDN3	-1.6154	7.38659	-4.26406	3.7882e-05	9.3921e-05	1.14638	DOWN	7.48336	6.73141	5.13426	5.13647	4.94325	5.05622	6.4469	5.09194	4.88838	5.19269	5.16528	5.00816	8.02284	5.23765	5.47438	5.81784	7.8256	5.00973	9.31109	5.60024	8.01434	8.87711	6.77213	9.68635	7.74488	6.755	6.52516	10.4618	7.64565	8.49085	7.67472	5.02478	9.46329	8.715	9.18527	8.48143	6.81682	9.14272	8.69944	10.6967	5.1629	5.33627
CLEC11A	-1.2295	6.08271	-7.7803	1.81511e-12	1.38984e-11	17.6018	DOWN	5.08597	5.06462	5.24974	5.03364	4.88685	5.0502	5.09813	4.87743	5.08474	4.92615	5.19885	4.92848	5.12136	5.16525	4.9327	4.9625	5.11089	5.24507	4.90768	5.19132	4.90353	6.47568	6.82308	6.15325	5.91008	7.0274	5.84206	6.34543	7.48991	5.80108	5.39981	7.20968	7.59707	6.20768	6.15241	7.14312	7.74252	6.02975	6.7062	5.65109	7.14905	8.01276
CLEC14A	-1.06268	6.89362	-7.88812	1.00994e-12	8.06608e-12	18.1803	DOWN	6.12091	6.10807	5.93085	6.03378	6.2208	6.05082	6.28893	6.08451	5.96695	6.13408	5.94653	5.68542	5.8565	6.0782	5.74314	5.8272	5.84428	6.15685	5.80241	6.11094	6.00889	6.53804	8.00144	6.83462	6.3275	7.30444	7.45605	7.70127	7.81561	6.34475	6.63136	7.84095	7.38892	6.88395	7.90756	7.6767	7.72793	7.16178	7.44149	6.52055	8.17205	6.47795
CLEC1A	-1.1173	5.28336	-7.00446	1.12791e-10	6.61257e-10	13.5336	DOWN	4.00322	4.15406	4.83542	4.70175	4.65735	4.33304	4.37072	4.2852	4.3174	4.30058	4.31656	4.30574	4.43013	4.24413	3.94657	4.44271	4.35225	4.40031	4.29923	4.48042	4.04331	5.3963	6.04741	4.96469	5.38544	5.39132	6.05603	5.49718	5.7416	4.63268	4.45801	6.66495	5.59958	4.35429	5.69707	5.5424	6.16388	5.14725	5.90325	4.54728	6.74215	9.84885
CLEC5A	-1.09015	4.14371	-4.56445	1.1301e-05	3.04008e-05	2.30609	DOWN	3.31502	3.33851	3.1831	3.15681	3.22643	3.23518	3.42085	3.16667	3.42362	3.12975	3.09795	3.0807	3.31288	3.20204	3.12079	3.11572	3.16348	3.42629	3.18569	3.06789	3.39765	5.44893	4.52975	3.98517	6.82605	4.55493	3.81412	4.1657	3.67721	4.66709	3.43791	4.6171	6.11104	4.83964	4.33215	6.84814	3.5945	3.49542	6.75672	3.48949	3.59325	3.80407
CLIC3	1.80171	5.36509	8.18039	2.03442e-13	1.7831e-12	19.7625	UP	6.57648	8.11262	7.51943	5.36342	6.5112	6.84996	7.59897	7.71647	7.22936	7.74831	7.34872	7.32179	6.14699	6.79403	7.6886	6.47418	6.83365	7.0738	5.5759	7.30321	4.6965	5.58933	4.18237	4.23038	8.1186	4.16364	5.2772	4.37092	5.4781	5.36341	6.3124	4.43678	4.63008	5.43465	5.48549	4.3634	5.50555	4.49057	5.23628	4.53814	4.21193	5.11725
CLIC4	-1.92772	8.11167	-12.5752	2.34523e-24	1.16788e-22	44.737	DOWN	6.32353	6.88247	7.0115	6.3188	6.47228	6.5722	6.8538	6.59174	6.2219	6.62919	6.37695	6.5574	6.40471	6.75067	6.7306	6.45109	6.46269	6.68736	5.906	6.34232	5.75603	8.45476	9.053	7.83461	7.95857	8.86804	8.27907	8.70435	8.33982	7.68729	7.77894	9.43887	8.69532	7.89763	8.7883	8.73885	7.45098	8.93976	9.14884	7.31438	9.58203	9.07429
CLINT1	-1.0639	8.16147	-9.79651	2.23098e-17	3.57042e-16	28.7874	DOWN	7.2903	7.39777	7.27555	7.38303	7.18316	7.25484	7.20282	7.29901	7.45802	7.25757	7.14346	7.30993	7.10248	7.10706	7.28865	7.23346	7.36539	7.1163	7.31576	7.34932	7.26951	8.76827	7.59578	8.52236	7.59191	8.44426	8.09598	7.92122	7.35343	8.59127	8.68674	8.27441	7.52725	9.31235	8.22584	8.42423	6.49543	8.64682	7.58894	7.57762	7.89696	8.3547
CLMN	1.03151	6.13815	9.27311	4.43935e-16	5.8794e-15	25.8241	UP	6.93483	6.67465	6.93764	6.73059	7.26116	7.00014	7.02676	7.33479	6.89719	7.21785	7.04342	7.13751	6.86233	7.0565	7.32249	7.0643	7.04391	6.79402	6.82401	7.2535	6.69917	5.49121	5.13592	6.19724	6.26642	5.946	6.11216	6.69934	6.01877	6.46673	6.74561	5.6701	5.47448	6.40828	6.90055	6.39748	5.60517	6.71081	5.6868	6.82293	5.16894	5.2016
CLMP	-1.53762	6.59059	-6.27232	4.67142e-09	2.15624e-08	9.87862	DOWN	5.31061	5.20826	5.28751	5.16262	5.18485	5.1918	5.50635	4.97576	5.22503	5.06185	5.19903	5.44234	5.51249	5.75151	5.05235	5.53254	5.39989	5.56192	5.01106	5.32905	5.3426	7.16343	8.25263	6.69712	6.52805	7.42565	6.3259	6.66726	7.93976	5.66379	5.88404	7.8251	7.28335	5.69032	7.35346	7.38987	6.7816	7.6636	7.24278	3.94279	8.66076	8.77113
CLPTM1	-1.32518	8.04699	-17.8103	5.70168e-37	2.21362e-34	73.5844	DOWN	6.93766	7.04299	6.97264	6.97474	7.06407	7.0108	7.00161	7.05645	6.68159	6.84305	6.6923	6.75758	7.06853	6.74075	6.85571	6.97052	6.76189	6.91236	7.1566	6.80266	7.28078	7.80461	7.90381	8.22349	8.22508	8.17749	8.25235	8.66702	9.21335	8.3549	8.86709	7.92702	8.47077	8.62713	8.22843	8.42597	9.36558	8.58731	8.11252	8.18194	7.64917	8.52497
CMBL	1.28679	7.938	10.4856	4.20849e-19	8.86745e-18	32.7251	UP	8.9587	8.9544	8.97861	9.15422	8.68971	9.15996	8.88812	8.90386	9.01879	9.05908	9.27351	8.95613	9.10054	8.95293	9.34064	8.92075	9.10052	8.87305	8.92858	9.08251	9.12693	7.78802	7.19112	8.24629	6.98408	7.3498	7.91954	7.82246	6.91024	7.49638	8.51233	7.21557	7.31933	7.94272	8.23591	8.0872	7.35805	7.8905	6.89815	7.34687	7.14889	7.81776
CMPK2	1.09456	7.80085	4.67484	7.14888e-06	1.99622e-05	2.74672	UP	9.07279	9.68958	9.28589	8.29568	7.65216	9.88715	7.80213	9.2592	8.13127	8.96729	8.23425	10.8332	8.47027	8.1172	8.49545	7.47069	8.27759	8.29572	9.87375	8.70832	8.32709	6.55227	7.42682	6.02228	9.15583	7.83776	7.23607	7.62293	7.15534	7.98089	8.47466	6.74442	7.25451	6.98887	7.44555	6.10359	4.97469	7.79127	7.24687	8.31549	6.94824	7.2018
CMTM4	1.0838	7.07376	8.05848	3.97788e-13	3.34925e-12	19.1002	UP	7.37472	7.80266	7.54295	8.53715	8.34988	7.98042	8.10648	8.20058	8.31259	8.36767	8.46398	7.48025	7.67789	7.95787	8.29512	7.87882	8.26843	7.90538	7.56062	8.01881	7.60555	6.65817	6.29369	7.66404	6.93732	6.91245	7.44429	6.59875	6.65538	7.47489	8.22716	6.39876	6.25251	6.91609	7.74345	6.56704	6.51913	7.25651	6.51851	7.52093	5.6175	7.4746
CNN1	-2.9303	9.1617	-6.71066	5.14063e-10	2.73815e-09	12.043	DOWN	6.59564	6.25449	6.9518	6.64441	6.60548	6.81725	7.24702	6.3508	5.88218	6.36685	6.52704	6.63213	6.63864	7.52793	6.58849	7.28316	6.89134	6.16348	6.02795	7.45707	7.19608	10.7525	11.1457	6.20706	8.79208	11.3175	9.2565	11.8518	12.6242	7.91555	8.35064	11.6219	10.1235	8.79397	10.8054	10.6512	12.8248	11.8404	12.1872	6.56095	12.4819	7.27474
CNNM4	1.5473	6.68543	12.1685	2.45651e-23	1.05751e-21	42.4036	UP	8.17563	7.98218	8.11293	7.95652	7.28089	8.06894	7.95337	8.10391	7.8441	8.18756	8.06088	8.42257	7.91449	7.60475	8.1731	7.65457	8.1043	7.43226	8.5405	7.9883	8.15609	7.16747	6.13742	6.70922	6.79282	6.6869	6.4584	6.40799	6.86764	6.95655	7.46341	6.09361	6.01347	6.70147	6.5273	6.27852	6.53122	6.17828	5.8538	7.1166	5.563	5.7782
CNTN3	2.06538	3.3045	9.95789	8.8281e-18	1.50472e-16	29.7065	UP	3.15641	4.90151	4.73173	5.89554	6.88896	5.00636	5.71793	6.92384	6.69181	6.09369	6.27259	5.37301	5.30794	4.73873	4.18011	4.7513	3.01849	5.43616	2.52248	6.08584	2.17284	2.73955	2.7445	2.55772	2.32658	2.67329	3.65176	2.88483	2.75824	4.20728	4.18414	3.45537	2.72492	2.66589	2.24692	2.47488	2.93136	4.46767	2.96146	2.70875	3.07047	3.99307
CNTNAP1	-1.09634	6.46667	-6.56973	1.05318e-09	5.35276e-09	11.3389	DOWN	5.42185	5.39191	5.68319	5.69994	5.56151	5.89793	5.4398	5.04883	5.44128	5.62605	5.71669	5.19978	5.53233	5.52266	5.62784	5.61821	5.66258	6.04073	5.3534	5.67242	5.28064	6.75573	7.77325	6.21603	5.88504	7.29681	7.11594	7.83411	8.1332	5.93609	5.6362	7.70312	7.05322	6.51496	7.06604	6.79182	9.38336	7.22204	7.49311	6.65637	8.67951	7.19488
COCH	-1.33631	5.81614	-8.42432	5.27063e-14	5.02267e-13	21.0972	DOWN	4.98428	4.78602	4.96848	4.24899	4.6108	4.71958	4.55272	4.2872	4.46888	4.74895	4.83634	4.60906	4.86289	4.49629	4.7107	4.725	4.72487	4.7437	4.86521	4.66405	4.92689	5.58022	5.85172	5.09665	4.76685	5.74781	5.81066	5.99086	6.27055	5.80828	6.95497	6.18863	5.12176	7.43532	5.41693	5.26426	4.99609	5.90243	5.61369	6.79301	5.84513	5.44612
COL10A1	-2.59902	6.2636	-6.42071	2.23083e-09	1.07888e-08	10.6028	DOWN	4.05202	4.11685	4.33198	4.08527	4.02268	4.06432	4.01633	3.86717	4.12281	4.14806	3.9767	4.00316	4.05127	4.27523	4.06536	4.01804	4.19046	4.00709	4.06878	4.13852	4.01705	8.20696	6.86124	6.89559	8.80704	7.22336	6.08174	7.15167	6.11099	6.78328	3.88955	7.11721	9.8109	7.56014	9.27941	8.51172	4.8551	5.73855	6.6939	5.00212	4.8612	4.34383
COL11A1	-1.78395	4.56361	-4.99071	1.85594e-06	5.70607e-06	4.04854	DOWN	2.92371	3.03386	3.08123	3.31143	3.20026	2.94071	3.00057	3.16494	3.20861	3.0472	3.11537	2.94937	3.04192	2.9736	3.03769	2.94266	2.94398	3.14245	3.09482	3.03685	3.14161	5.22637	5.03112	5.13451	7.25907	4.04125	5.10841	4.94384	3.63262	5.73516	3.08441	3.19355	7.42864	6.74958	7.2892	7.52506	3.77381	3.72488	5.50584	4.22837	3.88431	3.32347
COL12A1	-1.8592	6.37272	-9.82989	1.842e-17	2.99361e-16	28.9774	DOWN	4.93844	4.78996	4.67139	4.56389	4.36989	4.9637	5.08315	4.76346	4.70104	4.8453	5.06915	4.78536	4.75024	5.01357	5.10724	5.13297	4.6258	4.63068	4.52478	5.16959	4.49576	6.10865	7.08148	7.40866	7.4541	7.1102	6.01934	6.60806	6.4859	6.61082	6.02182	7.39638	7.48386	7.18671	7.1442	7.97339	6.06731	6.92404	5.72357	6.09139	7.43235	5.3291
COL14A1	-1.69115	5.77922	-7.19976	4.05302e-11	2.52741e-10	14.5407	DOWN	4.05993	4.22437	4.57669	4.76044	5.03667	4.47298	4.61471	4.101	4.44652	4.25233	3.98214	4.2981	4.65769	4.83787	4.27451	4.80329	3.89894	4.1793	3.57175	4.35566	4.09461	6.90701	6.53682	5.56936	4.86163	7.6426	5.85027	6.77029	6.56572	5.01224	5.34772	7.82165	6.82881	5.48782	5.79399	5.9014	6.50859	6.93235	6.80453	4.39085	7.61008	5.89818
COL15A1	-1.64078	9.86735	-7.46388	9.97546e-12	6.81445e-11	15.9215	DOWN	8.52803	8.33388	7.85113	9.16088	8.88592	8.88413	8.54436	8.404	8.62618	8.04779	8.35955	8.29717	8.80865	8.51794	8.3079	8.77208	8.73817	8.79835	7.73083	8.43393	8.20866	10.3836	10.9362	10.2819	10.4899	11.1868	10.0814	10.9735	11.4167	9.53868	8.65479	11.4563	10.8506	9.88547	10.8218	11.0319	11.5063	10.3538	10.0637	9.61367	11.155	9.3968
COL16A1	-1.35615	7.90139	-6.12662	9.57111e-09	4.19875e-08	9.1765	DOWN	6.66343	6.52528	7.08393	7.27604	6.73678	6.86342	6.52859	6.55238	6.64905	6.28448	6.42597	6.40201	6.78265	7.28859	6.56161	7.21478	6.7282	7.34739	6.61117	7.13269	6.32247	10.2667	8.41098	8.22709	7.45687	8.44463	7.38499	7.91899	8.67998	6.80236	6.82073	8.89618	11.4082	7.94086	8.63675	8.85492	9.05607	8.21763	8.90081	6.37615	8.65929	8.97288
COL17A1	2.43502	5.67122	11.7529	2.72548e-22	9.52327e-21	40.0135	UP	8.181	8.19559	7.21792	7.29493	6.36257	8.12426	7.96615	7.94368	6.96761	8.04563	8.02159	7.94664	7.51866	7.32558	8.03727	7.32991	7.98053	6.92892	8.68938	7.2455	8.77244	5.36743	4.42109	8.30492	5.54618	4.41015	5.40719	4.44606	6.16004	5.87345	6.78786	4.04702	4.34402	4.85334	5.10393	5.10798	5.75891	4.95075	5.06217	6.21189	5.04671	4.98333
COL1A1	-2.1457	8.92533	-11.9652	7.96711e-23	3.07041e-21	41.235	DOWN	7.07872	7.33241	7.42257	7.36403	6.63654	7.60104	7.14354	6.99816	7.0082	6.9491	7.13617	7.03257	7.5073	7.07212	7.12957	7.10078	7.26162	7.18245	6.809	6.93953	6.83544	9.48711	10.1771	9.93862	10.058	9.67842	9.43484	9.59576	9.9455	9.21285	7.78471	9.34566	10.3526	10.2507	9.66528	10.8015	10.6979	9.61032	8.88558	9.19061	10.4649	8.65661
COL1A2	-2.33979	10.9044	-10.8366	5.51976e-20	1.31204e-18	34.7408	DOWN	8.89513	9.11699	9.0671	9.16585	8.49729	9.67	9.11064	8.59703	8.69143	8.44827	8.97139	8.75739	9.21476	9.01003	8.89683	9.06428	9.00579	9.27724	8.58636	8.73705	8.89329	11.6316	12.4211	11.7219	11.6693	11.7749	11.1381	11.6313	11.5029	11.0733	9.51755	11.7399	12.439	11.985	11.9398	12.6805	11.9478	11.6405	10.8971	10.4487	12.3286	10.53
COL21A1	-1.04738	5.98922	-3.60017	0.000448235	0.000929777	-1.19788	DOWN	4.9059	5.42532	5.26091	5.1478	5.41604	5.01891	4.71078	4.76336	5.29519	5.10725	5.27116	5.16878	5.37295	5.34264	5.22537	5.14277	4.61994	5.54029	5.02269	5.03148	4.48826	7.17122	6.63655	5.20914	4.73141	6.34239	5.34084	5.82813	7.2066	4.82794	5.2542	7.91823	6.99451	4.55009	6.73341	5.399	6.13782	7.31026	6.73363	5.73396	8.39903	6.36972
COL3A1	-1.19527	9.65521	-7.14202	5.49191e-11	3.35973e-10	14.2417	DOWN	8.48072	8.81697	8.82792	8.77593	8.44634	9.19837	8.81914	8.5431	8.46678	8.3856	8.74752	8.54109	8.70642	8.94196	8.45242	8.72982	8.68727	8.91252	8.2748	8.53337	8.36406	9.92117	10.5432	10.1812	10.0369	10.4373	9.58871	9.66012	9.83668	9.43412	8.61739	10.2497	10.7327	10.1102	10.1171	10.8991	9.60797	9.9199	9.5283	8.70654	11.0314	10.1876
COL4A1	-2.33317	9.72913	-12.6442	1.57522e-24	8.21504e-23	45.1324	DOWN	8.13126	7.7391	7.74237	8.0658	7.28119	7.81677	7.92531	7.63825	7.56344	7.5223	7.42038	7.57629	8.0102	7.93941	7.43813	7.95649	8.18712	8.03614	7.83699	7.63106	7.65214	10.3813	11.0172	9.76963	10.172	10.7957	10.24	11.3242	10.6856	9.55745	8.79495	11.1892	11.2095	10.5773	11.1466	11.414	10.4917	10.0594	9.91175	10.2688	11.4712	9.5412
COL4A2	-2.02796	9.64158	-9.61901	6.16988e-17	9.25924e-16	27.7792	DOWN	8.17759	8.10044	7.82698	7.8041	7.6212	7.64799	8.00514	7.83092	7.38037	8.24175	7.79264	7.70526	8.23389	8.07491	7.90333	7.89122	7.96363	7.95329	8.4746	7.65989	8.37207	10.3424	11.1295	9.55958	10.0553	10.7214	9.99499	11.3886	11.3695	9.20804	8.83624	11.1549	11.1508	10.3513	11.197	11.3507	12.0675	10.1228	10.0997	10.0364	11.443	9.24896
COL5A1	-1.50558	8.32891	-7.29708	2.42345e-11	1.56668e-10	15.0471	DOWN	7.12158	7.28732	7.03805	7.2557	6.75482	7.6708	6.97952	6.95879	6.9059	6.8796	7.13849	6.9756	7.24984	7.15012	6.87709	7.14026	7.15079	7.41089	6.63706	6.76209	6.97565	8.58599	9.46429	9.22931	9.03464	9.20929	8.30951	9.01236	9.63765	8.28067	7.36141	9.13762	10.1409	8.97831	9.31317	10.2275	10.3474	8.90974	8.07385	7.9255	10.0022	8.31663
COL5A2	-1.74464	9.28932	-9.10603	1.14605e-15	1.41335e-14	24.8849	DOWN	7.866	8.00911	7.86745	7.68651	7.53905	8.32712	7.86773	7.57993	7.60488	7.45531	7.97772	7.67961	7.88452	7.98445	7.75921	7.78284	8.05209	8.23317	7.7042	7.6884	7.71757	9.58779	10.3079	9.94889	10.2843	10.1229	9.14254	9.85946	9.5687	9.48165	8.41165	9.88015	11.0263	10.1228	10.3242	11.0243	8.80719	9.58374	9.23366	8.86135	10.7341	9.2654
COL5A3	-1.20459	6.40725	-8.33607	8.60332e-14	7.93876e-13	20.6129	DOWN	5.29881	5.39593	5.58371	5.55862	5.52823	5.63846	5.46237	5.41611	5.32939	5.34693	5.12355	5.26829	5.38447	5.24932	5.18382	5.23762	5.5094	5.48292	5.30998	5.42332	5.54907	6.55637	6.84194	7.05518	7.13604	6.87916	5.86593	7.15035	7.82043	6.27786	5.90752	7.30694	7.51167	6.85506	7.42057	8.41831	8.52091	6.80357	6.35258	6.72207	7.48638	5.85405
COL6A1	-1.13819	5.84825	-9.58605	7.4503e-17	1.10542e-15	27.5923	DOWN	4.80708	4.94469	4.9967	4.83997	4.83603	4.92507	4.70873	4.98071	4.84767	4.86969	4.84687	4.94401	4.91235	4.93529	4.8498	4.80873	4.88694	4.89377	5.14892	4.7618	4.96901	5.93534	6.59981	6.23276	6.06435	6.44312	6.07997	6.49194	7.03955	5.72678	5.65795	6.48924	6.25919	6.06521	6.29677	6.89567	7.46076	6.42258	6.30203	5.63596	7.13141	7.05007
COL6A2	-2.66899	8.37863	-12.3695	7.68515e-24	3.54108e-22	43.5579	DOWN	6.04264	6.01917	6.04667	6.12903	5.72715	6.48394	6.25588	5.73959	6.10188	6.09206	6.29522	6.13893	6.24838	6.34888	5.91089	6.20115	5.95424	6.78126	6.0964	6.20394	6.00179	8.78747	9.777	8.79725	8.59362	9.50503	8.66868	9.67712	10.5657	7.87225	8.10048	10.0817	9.79104	8.80889	9.22081	9.71369	11.312	9.52374	9.80274	7.83777	10.2571	9.73392
COL6A3	-2.59742	11.2138	-12.6373	1.63853e-24	8.50291e-23	45.0932	DOWN	9.37447	9.36137	9.15833	8.80934	8.01046	9.38564	9.3421	8.95192	8.34742	8.92945	8.91701	8.47904	9.42282	9.08515	8.95765	9.24146	9.40483	9.39214	9.08076	8.62567	9.34405	11.7807	12.6287	12.084	11.5569	12.5401	11.7125	12.2851	12.5083	11.4775	10.4564	12.4818	12.3191	11.807	12.1066	12.6917	12.8777	12.3161	11.9313	10.4885	13.1847	10.2861
COL8A1	-2.16423	4.85115	-10.9449	2.94837e-20	7.3151e-19	35.3632	DOWN	3.17724	3.0006	3.09673	3.21472	3.12494	3.06761	2.96366	3.08714	2.88685	3.09883	2.81032	2.90489	3.04481	3.0263	3.05378	3.10349	2.9592	3.05058	2.92169	3.02123	3.04134	6.17911	5.11322	5.35516	4.66376	6.36701	4.65601	5.38338	4.65863	4.67901	3.58709	6.61673	6.57775	5.50032	6.04251	5.9279	4.46781	5.43984	4.75305	3.74954	5.98529	5.67357
COL8A2	-1.21016	5.79523	-7.74159	2.23874e-12	1.68649e-11	17.3948	DOWN	4.6919	4.4594	4.86015	4.83175	4.6941	4.68181	4.78954	4.6262	4.73088	4.9108	4.15097	4.63328	4.85826	5.18972	4.89188	4.78064	4.72999	5.14556	4.69084	4.98001	5.00168	6.49835	6.33449	6.25793	5.7103	6.32883	5.77594	6.77309	6.46436	5.477	5.43886	6.88915	7.52664	5.52257	6.52822	6.16292	6.91534	6.28692	6.80576	5.19208	6.76151	5.37936
COLCA2	1.44131	6.8214	6.04476	1.4267e-08	6.11549e-08	8.78605	UP	8.0183	7.93431	7.64701	8.19816	7.996	8.05344	8.09591	8.02001	8.21549	8.44601	8.56521	8.22243	8.36389	8.13143	8.54008	8.20007	7.74929	7.32947	7.45246	8.10352	7.41915	7.91582	3.72616	6.80893	3.53877	6.04065	6.12017	6.46263	6.81732	6.73977	6.7364	6.59599	5.70698	6.85923	6.37142	5.72776	6.56254	6.78169	6.16201	5.72315	5.26922	4.50278
COMP	-1.55744	4.86803	-5.91017	2.73354e-08	1.11582e-07	8.15062	DOWN	2.86024	3.48224	3.94435	3.74263	3.80792	3.18288	3.53545	3.73643	3.28472	3.72102	3.42691	3.77982	3.57246	3.68617	3.45896	3.21666	3.92332	3.28569	3.70009	3.45359	3.92413	5.87075	5.84359	6.72682	4.04868	5.2505	4.6621	5.76367	4.88006	4.38263	3.53506	6.7497	7.2675	6.21944	5.9201	6.52454	6.13442	4.78071	5.30029	5.33475	6.96142	4.17512
COMTD1	1.31469	7.19219	11.131	1.0024e-20	2.68053e-19	36.4341	UP	8.39495	8.46538	8.12883	8.03045	8.1059	8.22151	8.41399	8.30359	8.02968	8.38301	8.36101	8.04734	8.39466	8.23758	8.48611	8.15048	8.52	8.16286	8.59612	8.23768	8.58121	6.20546	7.32163	8.25009	6.99135	6.69092	7.23518	7.13853	7.0843	7.57399	7.82916	6.40437	6.59369	6.74874	6.99092	7.19419	7.24229	7.46046	6.66328	7.71982	6.39564	6.5832
COPG1	1.66989	7.89824	12.6822	1.26555e-24	6.717e-23	45.3498	UP	9.32628	9.51039	9.17568	8.61693	9.02133	9.31477	9.46145	9.52621	9.22225	9.58062	9.54339	9.34313	9.16025	9.03217	9.49632	9.20701	9.34176	9.24921	9.53357	9.26152	9.42755	7.40132	7.51604	8.81508	8.89613	7.85105	7.78833	7.79244	8.2552	8.31016	8.63674	7.28386	7.66033	7.98611	8.12119	8.10657	7.71785	8.04855	8.01269	8.99018	7.22005	7.68823
CORO1A	-1.0875	8.04864	-5.6438	9.67132e-08	3.61425e-07	6.91785	DOWN	7.68452	7.14541	8.29297	6.95828	6.78758	6.97455	6.49729	6.70503	7.03233	6.82373	5.98763	8.33593	7.4659	7.13363	6.54442	7.43381	7.05059	7.99112	7.51766	6.68803	6.76675	9.27729	8.62586	8.21841	8.19669	8.72384	8.7106	8.12712	9.71272	7.87553	8.00897	8.81741	8.88801	7.27129	7.22802	8.01364	8.68209	7.96564	9.11997	7.40115	7.83955	7.17419
CORO2A	1.61288	6.83227	6.60834	8.65885e-10	4.46795e-09	11.5311	UP	8.99983	8.48015	7.85961	7.28364	7.27444	8.04828	8.55209	7.9242	7.56886	7.90853	8.08986	7.90758	8.69481	8.06718	8.29153	7.95532	8.46915	7.96754	9.60028	7.91094	9.10591	6.20083	5.76218	8.32592	7.26524	6.53812	6.90017	7.37194	6.3572	8.02949	8.20387	5.55928	6.48956	7.4054	7.59701	6.55926	5.60588	7.01599	5.55746	9.04168	4.27871	5.26467
COX16	1.16587	9.17199	13.3043	3.54723e-26	2.33324e-24	48.9012	UP	10.0719	10.0882	9.81181	10.1813	10.4587	10.0388	10.2967	10.1438	10.2764	10.3055	10.1262	10.2319	10.1394	9.98373	10.4008	10.2962	10.0262	9.99976	10.0558	10.0255	10.2414	8.45503	8.55054	9.07373	9.23481	8.80669	8.99736	9.02513	8.94765	9.36096	9.5003	9.01087	8.56254	8.61993	8.74155	8.82644	6.9139	8.60828	9.20635	9.06336	8.63122	8.80893
COX7A1	-1.20366	7.81064	-5.55364	1.47242e-07	5.34719e-07	6.50843	DOWN	6.79429	6.35979	6.69461	6.5063	7.02029	6.76555	6.91207	6.82801	6.84189	6.95998	6.56674	6.77974	6.72612	7.19759	6.52416	6.97212	6.87695	6.6737	6.53158	7.32776	6.90876	7.75432	8.65507	6.94098	7.16115	8.49675	7.76102	8.98215	9.2508	7.11301	7.1939	9.34768	8.51618	7.01245	8.30345	8.19238	9.35833	8.54107	9.19505	6.80944	9.40389	9.93761
CP	-1.11454	4.53403	-4.7472	5.27485e-06	1.50614e-05	3.03966	DOWN	3.40778	3.68903	4.56061	3.52677	3.53911	3.70927	3.38774	3.39982	3.56724	3.54251	3.45369	3.21497	3.49995	3.41548	3.61359	3.57245	3.44258	4.38458	3.61387	3.4588	3.53319	4.32859	4.76358	3.64813	6.07943	3.91893	4.47131	4.639	4.04607	3.7329	4.53039	4.86632	4.0165	8.07466	4.93733	7.33459	3.58681	5.30711	5.98586	3.36875	5.46936	3.82159
CPA2	1.92451	5.62679	5.5201	1.71992e-07	6.17329e-07	6.35718	UP	5.31547	7.11514	6.64702	10.1152	11.3166	7.13354	5.17036	9.34446	9.55824	7.54796	6.33004	8.33167	5.80989	5.74869	6.26678	9.8682	6.7735	6.59317	5.11312	7.36608	4.68267	4.88703	5.04863	4.68809	4.43313	4.85404	9.8567	5.1184	5.04325	7.83129	7.32284	4.04702	4.46084	4.28542	4.70995	4.96426	5.78754	4.68914	4.63342	6.88063	4.01028	9.57186
CPLX1	-1.19547	4.83263	-6.1164	1.00615e-08	4.40192e-08	9.12761	DOWN	3.33511	3.60945	3.95598	3.64265	3.69315	3.61294	3.88227	3.96107	3.85439	3.59427	3.93675	3.38173	4.26215	4.25441	3.57584	3.6734	3.74999	4.15953	3.81991	4.18664	4.23262	5.22205	5.87662	6.1345	5.3692	4.9493	4.39877	5.91453	6.08723	4.57815	5.18298	5.73548	6.03625	5.14804	6.45275	5.20087	6.84395	4.91854	5.40617	3.93321	5.68869	4.17538
CPNE2	-1.64541	7.48158	-12.3423	8.99247e-24	4.08953e-22	43.4019	DOWN	6.44086	5.91836	6.2092	6.29374	6.22824	6.01474	6.1689	5.93387	6.11161	5.78616	6.19204	5.89784	5.97902	6.38304	5.82883	6.58478	5.80989	6.47998	5.72914	6.2814	5.78513	7.7553	8.0787	7.90581	7.31415	7.86991	7.37471	8.42105	8.66117	7.12826	7.28411	7.95399	7.94826	7.99574	8.10268	8.19083	9.00009	7.91378	8.58685	9.08168	8.44626	8.24406
CPNE3	-1.03838	8.96055	-10.8028	6.7147e-20	1.56938e-18	34.5463	DOWN	8.20575	8.20666	7.23372	8.28874	8.39503	7.90962	8.27402	8.00009	8.27596	8.20245	8.21034	7.89218	7.84429	8.0211	8.32631	8.14086	8.23332	7.96177	8.14648	8.11228	7.95373	8.9937	8.7617	9.23818	9.98862	9.42581	9.05656	9.23153	9.00329	9.47374	9.54549	9.32844	8.84583	9.65495	9.14235	8.89037	7.3243	8.96484	9.1332	8.93778	8.59262	9.5405
CPT2	1.23706	7.02374	11.9805	7.2933e-23	2.84208e-21	41.3227	UP	8.22219	8.31337	7.99216	7.86091	7.90916	8.01927	8.15249	8.09472	7.786	8.21688	8.07706	7.91609	7.99283	7.79325	8.10983	7.87357	7.99509	7.90089	8.51897	7.96904	8.63002	6.31723	6.19039	7.34006	6.69253	6.50931	7.13097	7.01965	7.2082	7.2927	7.60705	6.27519	6.48739	6.33425	6.92607	6.2804	6.84856	6.86337	6.715	7.27275	6.07996	7.54873
CPVL	-1.59587	7.83584	-8.22632	1.57897e-13	1.40386e-12	20.0129	DOWN	7.15442	6.18376	7.55156	5.80015	5.99128	5.97221	6.25091	6.24308	6.2776	6.08714	5.89029	7.05885	6.26042	6.9953	5.6706	6.60647	6.29812	7.45428	7.27026	6.4439	6.9105	8.00905	8.44739	8.01898	7.12794	8.89388	8.17664	8.54991	8.32789	7.25551	6.82372	8.27327	8.0385	9.11854	8.08486	8.11258	5.72702	8.69858	8.76195	9.32001	9.43034	7.59166
CPXM1	-1.79425	5.91861	-7.11355	6.37673e-11	3.87165e-10	14.0947	DOWN	4.10014	4.3165	4.06812	4.74187	4.47986	4.4782	4.50205	4.53229	4.3624	4.11864	4.88357	4.48312	4.70515	4.1171	4.14861	4.39987	4.67453	4.28189	3.87486	4.51204	4.82529	6.284	8.021	7.01643	5.96091	6.94048	6.44941	6.35596	7.89715	6.64147	4.5761	7.37399	7.06098	6.41623	5.99112	7.19627	8.7171	7.40581	7.49738	5.48779	8.21979	4.71677
CPXM2	-1.40283	5.95641	-7.67702	3.17441e-12	2.33187e-11	17.0504	DOWN	4.74024	4.83458	4.91438	4.84914	4.72239	4.87579	4.73083	4.75799	4.79119	4.52589	4.63747	4.5141	4.93244	4.95364	4.76553	4.89238	4.89504	4.72304	4.79575	4.45956	5.00055	6.61154	6.7901	5.70685	5.87259	6.62397	6.14649	7.30124	7.37251	5.40576	5.2999	7.11212	6.58597	5.60665	7.0168	6.31653	7.65806	6.84897	7.34864	5.04515	7.61204	7.79935
CRACR2B	1.24503	6.72819	7.74228	2.23039e-12	1.68262e-11	17.3985	UP	7.38486	7.69196	8.02906	8.00592	7.58126	8.10091	7.79505	8.10492	7.5169	7.98233	8.06466	7.40867	7.39645	8.12015	8.04439	8.11963	7.6571	7.80866	7.19197	7.9399	7.33335	7.66524	5.92099	6.92335	6.27172	6.88512	6.95125	6.48072	6.46067	7.24573	7.92724	6.13096	6.84804	6.33386	7.18785	6.29999	6.25282	7.22213	6.6111	6.53203	5.37398	6.35627
CRB3	1.0607	7.59736	9.83503	1.78846e-17	2.91563e-16	29.0066	UP	8.59241	8.58929	8.27864	8.29389	8.29686	8.3815	8.72368	8.82927	8.11832	8.824	8.56809	8.37325	8.32148	8.51597	8.85812	8.28906	8.42236	8.41028	8.83471	8.33165	8.42265	6.31693	6.95487	7.75008	7.56891	7.34091	7.63993	7.1895	7.4027	8.32287	7.84229	7.02049	6.71216	7.31537	7.38773	7.39689	7.58989	7.17074	7.13879	7.58367	6.80871	7.11159
CREB3L4	1.09612	6.9078	6.39217	2.57324e-09	1.23255e-08	10.4628	UP	7.51568	8.14712	7.60247	7.79122	8.35475	8.1453	8.13476	7.91556	8.23922	8.19094	8.24537	8.18361	7.62276	7.71892	7.70847	8.13331	7.55933	7.79145	6.40446	8.07128	6.9442	6.16227	5.82329	6.67216	6.97675	6.14194	7.2269	6.50824	7.13077	6.8356	7.93718	6.12829	6.40463	6.93067	8.16524	7.33277	6.58557	7.46011	7.79775	6.95328	5.48624	6.7227
CRIM1	-1.17901	8.27144	-10.0015	6.8707e-18	1.20338e-16	29.9551	DOWN	7.76312	7.27021	7.34125	7.24627	6.77714	7.30733	6.96652	6.76106	6.69181	7.23515	7.11027	7.99958	7.56485	7.45699	7.22103	7.13512	7.3288	7.14338	7.4636	7.60555	7.49091	9.16254	8.57416	8.08148	7.96679	9.13345	8.03842	8.86835	7.87352	8.05656	8.14344	8.67057	8.45823	8.32427	9.20861	8.8058	6.90024	8.74087	7.86744	8.12261	8.37497	7.686
CRIP1	1.82779	9.69132	8.93899	2.94736e-15	3.41201e-14	23.9499	UP	10.6703	11.7771	11.2211	10.4006	9.76991	11.3536	11.7954	11.5454	10.833	11.9804	12.0126	11.5939	10.978	10.5453	12.2914	10.682	10.8465	10.5363	11.2594	11.7427	11.9601	9.89523	8.54147	8.54028	11.1234	9.57934	8.53844	10.0126	10.2973	8.23212	10.8547	9.45531	8.79169	8.80133	10.6118	9.84354	10.0345	9.20202	9.83172	9.10573	8.72713	7.27408
CRIP2	-1.518	7.6282	-9.49068	1.28491e-16	1.85015e-15	27.0523	DOWN	6.15791	6.22497	6.36187	6.03036	5.9138	6.5704	6.99463	6.64992	6.23053	6.37902	6.89281	6.68731	6.15021	6.39359	6.6373	6.09897	6.06966	6.50792	5.99308	6.47002	5.97152	8.10708	8.28145	7.1158	8.10067	8.18029	8.01398	8.78424	8.72917	7.27722	7.74478	8.73114	8.09413	7.3202	9.09072	8.85416	9.33749	8.33856	8.43258	7.5538	8.68063	7.81603
CRISPLD1	-3.26716	5.64925	-9.38153	2.39494e-16	3.30764e-15	26.4354	DOWN	2.83142	2.53172	2.7585	2.76244	2.95866	2.90985	2.88536	2.85194	3.3756	2.8891	2.65244	2.93315	2.80262	3.21327	2.95227	3.20247	2.75557	2.58934	2.7654	3.44549	2.87265	7.40003	7.45468	6.18776	4.69046	7.70761	4.40547	6.91863	7.08459	4.94663	3.69031	8.48584	7.3127	7.00401	6.72113	6.99738	5.53002	6.59774	6.81893	3.51111	7.79606	9.43141
CRNDE	1.10973	6.1614	4.72173	5.87251e-06	1.66021e-05	2.9362	UP	7.13558	8.24358	6.90205	6.87105	6.52702	7.56152	7.61082	7.46782	7.2255	7.38749	7.15452	7.41678	6.8906	6.04089	7.05492	7.42704	7.17651	6.01411	7.26814	6.07913	7.53109	5.47705	3.65126	5.79807	5.87014	5.40865	6.81544	5.06563	6.38474	6.6369	6.58707	5.37151	6.15761	6.07791	7.27304	5.15574	3.74311	5.48292	6.70459	6.61156	3.54423	6.14292
CRYAB	-1.95511	7.9534	-6.74054	4.41166e-10	2.37277e-09	12.1931	DOWN	6.37714	6.24657	6.29463	5.68028	6.42395	6.32841	6.65054	5.75287	6.70972	6.1362	6.06855	6.26483	6.49718	6.70575	6.32747	6.83097	6.157	6.3404	5.79861	6.71931	6.18543	8.59293	9.84181	6.623	7.25376	9.42826	8.22629	9.23986	9.97517	6.94281	7.20333	9.8063	8.78702	7.37229	8.80226	8.26922	10.7544	9.32762	9.98314	7.23019	10.9429	7.48906
CRYBA2	1.30669	3.91288	6.58663	9.66751e-10	4.95064e-09	11.423	UP	5.66501	5.98116	4.33952	3.64493	3.84084	4.73837	4.55393	4.59908	5.5676	4.76044	5.66463	4.53325	5.29745	4.52315	4.34336	4.83923	5.26127	4.62726	6.36215	6.17841	5.92444	3.89815	3.03857	3.65535	3.69423	3.77623	3.76706	3.45946	5.65845	3.18827	3.96127	3.28166	3.56372	3.12506	3.51634	3.36024	4.51642	3.77573	3.65225	3.52701	3.22885	3.4804
CRYL1	1.05392	7.88181	7.46829	9.74345e-12	6.67118e-11	15.9447	UP	9.42973	9.19756	7.97697	8.08034	9.09836	8.20801	8.90249	8.53154	8.5681	8.73317	8.39806	8.40509	9.56212	8.10784	8.60086	8.65365	8.98881	7.93198	10.257	8.52402	9.97354	8.32972	7.37727	9.39679	7.16686	7.75413	7.66306	7.70988	7.8732	8.31941	8.263	7.71001	7.25724	7.41311	6.92552	7.63894	8.12439	7.7641	7.5375	8.36515	7.37059	8.04761
CSAG2	-1.0422	5.03683	-3.81846	0.000205399	0.000450674	-0.461857	DOWN	4.31401	4.42239	4.54413	4.48891	4.04224	4.23381	4.02698	3.97047	4.0311	4.13068	4.25951	4.28238	4.03938	3.62901	4.39988	3.87568	4.11843	3.99565	4.18506	4.18491	4.1945	4.13226	4.90812	4.31897	4.6821	5.22676	4.76323	5.1205	4.56193	4.39417	4.28675	3.89257	4.47588	8.78066	4.47686	4.84044	5.59525	5.245	6.90436	8.14671	4.63475	4.5456
CSF1R	-1.72835	8.07056	-12.6296	1.71339e-24	8.84757e-23	45.0489	DOWN	6.02958	6.37637	7.03242	7.25267	6.42479	6.68893	6.1285	6.58081	6.74522	6.57542	6.45505	6.61952	6.80265	6.61699	6.52505	6.60459	6.49936	7.36796	6.71308	6.35617	6.56549	8.78038	9.0801	7.91152	8.38958	9.03367	8.71889	8.86841	9.57721	7.92962	7.781	8.30805	9.20633	8.2169	8.21421	8.68573	9.21076	8.39004	9.6889	7.51145	9.77717	8.47975
CSF3R	-1.58733	6.48701	-12.6257	1.75176e-24	9.00139e-23	45.0268	DOWN	5.09321	5.119	6.08946	5.1383	5.14172	5.07646	5.3501	5.10901	5.07508	5.05518	4.80042	5.07427	5.00111	5.09265	5.11154	5.08021	5.25273	5.81162	5.03185	4.63249	5.06012	6.46647	7.24905	7.38957	7.19938	6.94757	8.20284	6.31033	7.63268	7.18204	6.36032	6.73386	7.13371	6.58318	6.2513	7.02628	7.07448	5.96605	6.717	5.84291	7.06401	6.12267
CSGALNACT1	-1.37639	6.35173	-10.1567	2.81097e-18	5.2712e-17	30.8414	DOWN	5.30624	5.25546	5.6729	5.47359	5.03714	5.74813	5.52873	5.09436	5.42812	5.15324	4.94733	5.43684	5.26938	5.23722	4.60953	5.56309	4.90408	5.31328	4.33995	5.25545	4.50638	6.43749	7.26063	6.36931	5.82403	6.66069	6.84707	6.60607	6.70356	6.05162	6.53656	7.26955	6.87419	6.85397	7.26885	7.06115	6.29653	7.04959	6.5126	5.63805	6.90818	6.6515
CSRP1	-1.55542	10.5936	-6.02501	1.57032e-08	6.68869e-08	8.69228	DOWN	9.31947	9.37116	9.46743	9.22578	9.19911	9.24267	9.4767	9.13627	9.12314	9.22782	9.23202	9.20277	9.2664	9.42969	9.24282	9.26139	9.29625	9.22317	9.1336	9.48028	9.43965	11.2903	11.6607	9.7679	10.2039	11.8031	10.6738	12.2912	12.6753	9.87184	10.0795	12.2524	10.9885	9.87284	11.687	11.2986	13.2537	12.2215	12.7763	9.68154	12.9563	9.58743
CSRP2	-1.26758	8.21836	-6.6265	7.89585e-10	4.08833e-09	11.6216	DOWN	7.01743	6.63654	7.47978	7.49303	8.24264	6.82746	7.18386	7.11608	7.07531	6.89969	6.67401	7.18258	7.065	7.97018	6.71286	8.01633	6.88347	7.47072	5.82551	7.37313	7.05572	8.17674	9.64413	6.63643	8.35838	8.28206	7.85542	9.16958	9.1427	7.25487	8.50494	9.64374	9.1067	8.53253	8.93732	8.75123	9.12435	8.60809	9.10154	7.46905	9.55512	7.45455
CST1	-3.04055	6.82472	-5.83934	3.8369e-08	1.53045e-07	7.81954	DOWN	4.03623	4.42766	4.4732	4.06731	3.82737	4.75175	4.18594	4.01881	4.7415	4.92113	3.92558	4.24005	3.99362	3.93552	4.37944	3.87963	5.19816	4.02815	4.03477	4.10292	4.45701	8.5627	8.94258	7.07713	9.36876	7.6328	8.09085	9.18116	6.04441	9.13633	4.70977	6.57541	10.4294	10.6216	10.8178	10.7954	5.26718	7.11315	9.61047	8.034	4.41347	5.92126
CST2	-1.30159	6.11402	-5.20831	7.10304e-07	2.32245e-06	4.97901	DOWN	5.06499	4.81063	4.98826	5.05702	4.81649	5.16507	5.10004	4.48587	5.08086	4.99044	5.0785	4.84223	5.12878	5.08345	5.2884	4.93461	5.01753	5.20688	5.1917	5.30825	4.76964	6.52237	6.47398	6.25499	6.65911	6.89027	6.75499	7.84099	6.42948	6.64763	5.23655	5.94682	8.67859	6.76891	8.56305	7.25273	6.01062	6.02792	7.31545	6.43279	5.01085	5.52747
CST4	-1.13234	7.3675	-4.18063	5.24899e-05	0.000126999	0.834846	DOWN	6.11571	6.44241	6.42869	6.81891	6.57321	6.56022	6.28093	6.48595	6.52237	6.35199	6.5619	6.35274	6.33052	6.28765	6.31738	6.43464	6.36932	6.33225	6.32503	6.44339	6.38616	8.04231	7.22199	7.06462	8.75087	7.27336	7.49703	8.25044	7.13136	8.59525	5.97214	6.95233	9.13272	9.23265	9.7533	9.44408	7.15581	6.80898	9.14549	8.26679	6.93911	6.80811
CSTA	2.80605	8.84998	11.4625	1.46673e-21	4.45006e-20	38.3422	UP	10.3321	10.5593	11.5476	11.9551	11.4042	11.3395	11.0042	11.8212	11.2389	11.9062	11.5772	11.4417	11.42	11.1729	11.6565	11.1644	11.3405	11.4264	10.5019	11.9766	8.61543	8.14677	7.97707	6.94811	7.45565	7.63413	9.92315	7.36564	8.84813	9.50482	10.148	8.88497	7.78531	8.0393	7.45149	7.89129	5.16514	7.92915	9.45643	7.1072	8.40342	7.70878
CTAGE5	1.0292	4.96481	15.1678	9.45181e-31	1.34709e-28	59.3658	UP	5.66034	5.84429	5.77478	5.83649	5.77622	5.77515	5.76024	5.8219	5.90578	5.68515	6.03308	5.83532	5.97417	5.99261	5.79921	5.7254	5.92246	5.8816	5.93826	5.79112	5.70222	4.51474	4.62166	4.77212	4.84541	4.40732	4.99878	4.58463	4.21734	5.17391	5.22087	4.4256	4.47632	4.53976	4.83401	4.58165	4.23146	4.60418	4.25411	4.50088	4.26683	4.54577
CTF1	-1.12225	5.71249	-10.7472	9.26253e-20	2.12926e-18	34.2271	DOWN	4.65098	5.08291	4.60965	4.96049	4.93232	4.83979	4.95072	4.93537	4.88466	4.71792	4.34208	4.60929	4.71927	4.63662	4.69624	4.8307	4.56814	4.9053	4.52594	5.03231	4.71383	5.80217	6.51095	5.76044	5.81381	6.24231	5.93026	6.2591	6.82825	5.32389	5.33924	6.21172	5.75173	6.32697	5.78933	6.48798	7.28401	6.2413	5.84632	5.43506	7.16103	6.67328
CTGF	-2.94971	10.1058	-14.2068	2.08069e-28	1.91323e-26	54.0068	DOWN	8.40755	7.23898	6.89194	7.09678	7.04136	7.7808	7.40192	7.42522	7.65494	7.52082	7.25424	8.00955	7.37558	7.71717	7.43396	7.99311	8.69414	7.31162	7.70758	7.82475	8.35128	11.4006	11.2985	9.65297	10.9838	10.7823	10.7453	10.7308	10.0198	9.81917	10.1199	12.2036	12.292	10.6726	10.8034	10.84	10.8411	11.3208	10.2417	8.67049	12.3844	12.2531
CTHRC1	-3.51622	9.18642	-11.9377	9.34509e-23	3.56867e-21	41.0765	DOWN	6.56095	6.60039	6.91022	5.66654	6.26385	6.20558	6.33283	6.21565	5.90565	5.75212	5.77606	5.7093	6.99552	5.39789	5.93743	6.94974	5.3634	7.15658	6.48278	5.94726	6.69172	9.97813	11.0106	10.4351	10.3846	10.4794	10.0542	9.59401	9.88106	9.85551	6.89227	10.6328	11.3039	10.9725	10.6608	11.1566	8.88296	10.0348	10.381	9.95948	10.3841	8.08689
CTNNB1	1.05617	8.11125	10.0463	5.30738e-18	9.42161e-17	30.2111	UP	9.21846	8.99681	8.86748	8.54194	8.77369	8.84649	9.03727	9.22395	8.99353	8.88958	8.78327	8.95326	8.95832	8.91816	9.01508	9.0252	8.90637	9.01984	9.64246	9.00884	9.3673	7.89265	7.98114	7.62865	9.1449	8.18358	7.4106	9.06975	7.52346	8.15333	7.92574	7.87864	8.67911	8.72263	7.99276	8.29347	6.78659	7.60525	7.48078	8.39406	7.80308	7.8889
CTNNBL1	1.53252	8.31085	18.9293	1.70606e-39	9.93544e-37	79.3484	UP	9.21719	9.32791	9.58308	9.13546	9.27885	9.83003	9.99305	10.0326	9.20304	10.017	10.1809	9.98267	9.33417	10.1093	10.3075	9.27933	9.30122	9.50929	9.04381	9.65933	9.26492	7.24555	8.48982	8.19421	7.66231	7.6482	8.12051	7.7858	7.76344	7.75473	8.78136	7.73636	7.3669	7.80579	7.66919	8.05429	7.95831	8.28415	8.27207	8.2165	7.64811	7.54107
CTSE	3.02021	10.8277	6.02494	1.57082e-08	6.68948e-08	8.69197	UP	13.1573	13.295	13.364	13.4046	13.2904	13.4009	13.3394	13.5475	13.4846	13.3824	13.4558	13.5723	13.2602	13.4196	13.5782	13.3753	13.439	13.1624	13.2348	13.5287	13.0238	7.20915	7.39126	11.4778	9.1905	10.3575	12.7392	8.93055	9.88677	12.8142	12.9824	10.124	7.16098	7.27954	10.9426	11.0613	8.69556	11.1447	7.85754	9.96323	4.64787	11.4161
CTSK	-2.26568	9.73364	-12.5034	3.54828e-24	1.71801e-22	44.3256	DOWN	7.87041	8.02846	8.40968	7.60468	7.62344	7.84464	7.36968	7.67923	7.733	7.7175	7.53329	8.0543	7.99018	7.60759	7.71514	7.98564	7.84496	8.28896	8.16999	7.67482	7.65103	9.70503	11.1222	10.8105	9.53743	11.0339	10.1601	9.57617	10.6492	9.73392	8.93424	11.1202	10.7289	9.13951	10.3176	10.3799	9.72975	10.4382	10.7475	8.37769	10.1959	10.3168
CTSL	-1.73185	9.55258	-11.6363	5.35625e-22	1.78244e-20	39.3425	DOWN	7.96968	7.92194	8.29618	7.94016	8.41498	8.01775	7.9192	7.89324	8.17902	7.98874	8.08959	8.38246	7.77122	8.07111	7.73608	8.33524	7.98315	8.60822	8.26089	8.29394	7.94857	9.80177	10.697	9.16646	10.6134	10.1215	9.40256	9.69923	9.71379	9.77153	8.91077	10.2218	10.3682	10.0795	10.2815	10.264	9.22386	9.6612	10.4654	10.1262	10.9744	12.4064
CTSLP8	-1.20942	4.10759	-11.4808	1.31912e-21	4.04911e-20	38.4476	DOWN	2.99449	2.6029	3.01909	3.27453	3.29538	3.59512	3.60751	2.78641	3.21224	2.86927	2.97886	3.03355	2.86737	3.22392	3.14486	2.9892	2.58417	3.41408	3.42766	3.01781	2.96373	4.24423	4.64514	3.80155	4.50763	4.52429	4.24996	3.97229	4.2538	4.20728	3.3775	4.22465	4.53535	4.15357	4.28595	4.87989	4.06956	4.20071	4.06184	4.46391	5.37608	6.41185
CWH43	3.73979	3.78149	17.4254	4.36249e-36	1.45174e-33	71.5652	UP	6.23769	6.03969	5.75511	7.90508	7.79257	7.29053	7.2384	8.20745	6.44336	7.77004	8.23713	6.90514	6.83419	7.26734	8.32847	6.88828	8.00572	6.65204	5.79626	6.69576	3.16249	2.69138	2.83433	2.72474	2.75675	2.71265	4.6061	2.71084	2.91876	5.46405	5.00267	2.83752	2.80344	2.60205	3.06816	3.05961	2.91769	2.80456	2.7617	3.20399	2.62868	3.59854
CXADR	1.93373	7.10108	6.87599	2.19709e-10	1.23889e-09	12.8781	UP	8.70002	8.73491	8.454	8.69094	8.78454	8.5761	8.7969	8.82972	8.70396	8.48834	8.65405	8.87893	8.67759	8.9943	8.80738	8.66317	8.70608	8.3683	9.24187	8.79656	8.72285	5.51431	5.3678	6.69409	7.46773	6.27308	7.90179	6.11247	5.20797	8.02062	8.24294	4.90786	5.95107	7.52532	7.51372	6.54599	4.4283	7.193	5.55773	7.90046	3.95449	6.68429
CXCL1	-1.9285	7.28377	-5.31623	4.37146e-07	1.47843e-06	5.45019	DOWN	5.59134	5.44049	7.978	4.98333	5.08487	5.79223	5.10213	5.46618	4.75713	4.81993	5.30973	5.00469	5.12077	5.22017	4.84159	5.71431	6.34459	8.39855	5.9781	6.51634	5.43919	4.8383	6.91377	6.87031	10.9051	8.85503	7.06904	6.78527	8.66542	9.12068	6.33742	9.14038	8.74293	8.56622	9.94838	9.29061	5.64906	6.48066	5.41204	6.94808	6.07403	5.86374
CXCL10	-1.30365	7.94561	-3.83881	0.000190673	0.000420609	-0.391456	DOWN	6.29244	8.3662	7.73508	6.89445	6.07064	7.89335	5.05487	6.7873	7.62112	7.43031	5.91349	10.602	5.29	4.83053	6.31355	5.45529	5.94703	7.47405	7.31159	7.57696	6.9763	7.30724	9.33214	5.70732	10.8799	8.79782	7.95521	7.88935	7.5606	6.50386	6.76393	7.42155	9.01109	8.09446	9.02372	8.18419	4.36387	7.82234	9.30162	7.09845	7.02049	8.39601
CXCL12	-1.10863	7.91846	-3.7638	0.00025048	0.000541923	-0.649445	DOWN	6.52074	6.92786	7.61451	7.54947	7.63634	6.95191	6.80704	6.85183	7.1233	6.64061	6.88096	7.26984	6.75761	7.40926	6.6026	7.75125	6.81957	7.54031	5.22617	7.16634	6.66279	8.61641	9.58586	6.63223	7.31713	7.55072	8.12458	9.28977	9.52159	6.55596	7.56079	9.17301	8.86629	7.4616	7.71486	8.50397	9.43541	9.73681	9.76579	6.51614	10.4375	7.56847
CXCL13	-3.22785	7.36943	-7.45115	1.06777e-11	7.27045e-11	15.8545	DOWN	2.77378	6.85165	9.73561	4.52969	5.81427	5.6235	2.8014	3.76663	6.25665	2.71662	2.64984	2.78367	5.6681	4.62313	3.00202	7.50905	3.45089	8.70727	3.59192	2.54842	2.353	8.67593	9.65737	6.87831	9.75207	6.70347	8.59943	6.97038	9.83015	4.91962	7.73055	10.487	7.9339	6.64535	6.46435	7.00303	6.56426	7.89958	9.34139	6.48182	5.35838	9.65327
CXCL14	1.57013	7.473	6.90468	1.894e-10	1.07872e-09	13.024	UP	8.8137	8.51793	9.20358	9.30134	8.23924	8.9304	9.05224	8.19531	8.83511	8.38665	8.1713	8.45333	9.28065	8.97579	8.40264	8.88403	8.48759	9.76708	9.34163	8.60587	8.81464	7.41137	6.18768	7.95519	4.09424	6.27789	8.19906	6.67896	7.40003	7.62217	8.47048	6.61737	6.82987	6.29235	7.77197	8.07327	6.51427	7.04922	6.66859	7.36238	7.1666	6.65863
CXCL17	2.90841	8.10237	5.87632	3.21538e-08	1.29685e-07	7.99207	UP	9.87088	10.1065	10.8937	11.2589	11.2512	11.1865	10.7942	11.0737	11.1591	11.1882	10.8062	11.077	10.0626	10.7436	11.0008	10.7297	10.419	11.2143	8.70816	10.9619	7.00351	4.91019	4.76185	5.1197	5.1145	7.25815	11.4926	8.25366	5.42126	11.0241	11.0059	4.77669	5.33665	5.9774	8.06159	10.6358	5.80459	10.3675	8.18626	8.0973	5.21082	11.0875
CXCL2	-1.41462	5.14472	-8.49915	3.47517e-14	3.39501e-13	21.509	DOWN	3.80168	3.85048	5.08119	3.58273	3.5745	4.31882	3.80831	4.36086	3.80104	3.79502	3.76648	4.06766	3.33024	3.43984	3.5874	3.73705	3.96721	5.21203	3.7568	4.32329	3.8956	4.5853	5.28688	4.23441	6.83921	5.81541	5.4089	6.26969	5.03491	6.59568	4.60567	5.06442	4.65301	6.96376	6.79669	6.69606	4.55429	5.28983	4.68609	5.2324	6.54549	5.20243
CXCL5	-1.29111	5.47458	-3.54577	0.000541712	0.00110617	-1.3758	DOWN	5.07149	4.36604	7.41856	2.86277	2.7395	4.98279	4.59027	4.35803	3.31335	3.59766	3.57077	4.37853	3.59731	3.48231	3.6027	4.29976	5.32283	6.51703	4.91357	3.72479	5.4563	4.37018	6.18049	7.01917	6.17015	5.08862	6.81015	5.77472	6.27	5.31904	4.25961	6.49613	6.92753	8.19407	6.06381	6.68453	2.95474	5.63705	3.88106	6.20051	2.91671	5.54195
CXCL6	-1.43795	4.34951	-3.99224	0.000107869	0.0002474	0.148844	DOWN	3.33669	2.69881	4.22902	2.93911	2.809	3.23062	3.12215	3.50543	3.04923	2.73357	2.79266	2.69242	2.64329	2.84188	2.97641	3.2311	3.32366	5.19107	2.53881	3.0298	3.03199	2.69128	5.1835	3.67517	3.6118	5.12659	3.29369	3.77498	7.0407	6.49093	3.2001	7.24327	8.05723	5.07011	4.68976	6.03916	3.18595	3.749	3.244	4.22714	3.00538	5.24409
CXCL8	-3.65849	7.43782	-7.98656	5.89957e-13	4.83709e-12	18.711	DOWN	3.82221	3.9052	7.77533	3.92949	3.5684	4.64045	4.28371	3.74575	4.24146	3.73627	3.65235	4.74595	3.08839	3.20468	3.82239	3.90426	5.65282	6.95219	4.06171	4.94614	3.90948	5.50271	8.46099	8.40428	10.3485	8.77312	8.41954	6.16493	8.62765	9.65031	7.24204	8.96416	8.27955	9.62452	10.3233	10.2694	5.0051	5.59666	5.16776	6.59036	7.62932	5.6281
CXCL9	-2.14322	8.0469	-5.68198	8.0849e-08	3.05736e-07	7.09247	DOWN	5.41754	7.38079	7.95636	5.57583	5.18099	6.94368	5.06355	5.91727	7.01344	6.78498	5.88552	9.70968	4.70065	5.07564	5.00869	5.63426	5.3899	7.87828	6.47491	5.98646	6.1591	7.50365	9.77169	5.86449	10.6807	9.10522	8.13078	8.81217	7.15587	6.31994	6.66893	7.33116	8.86688	8.23446	8.79186	8.86863	5.21799	8.06265	10.2971	7.34323	7.65254	7.79948
CXCR2	-1.03229	5.16953	-4.27791	3.58713e-05	8.92843e-05	1.19853	DOWN	4.13792	4.34705	6.3363	4.45139	4.14368	4.1965	4.31827	3.99444	4.04906	4.21518	3.78141	4.48152	4.18563	4.09443	4.05408	3.99107	4.33566	4.3772	4.24986	4.2045	4.38563	4.10385	5.22476	7.17505	5.64583	5.2848	7.98276	4.18807	6.73357	6.2314	5.76907	5.22871	4.65448	5.26515	4.11453	5.46863	3.59707	4.66215	4.08435	3.73133	4.76393	4.94809
CXCR4	-2.34073	8.94654	-12.6723	1.33946e-24	7.09136e-23	45.2934	DOWN	6.55347	7.22054	8.60543	6.97369	7.44775	7.19095	6.6169	7.01691	7.4328	6.38889	6.4408	6.9425	6.73145	7.49257	6.35894	7.8331	7.14598	7.53288	6.33508	6.36173	5.9198	10.8652	9.88077	8.93127	9.29052	9.76119	10.3419	8.54425	10.0914	8.68037	8.21354	11.0532	10.2229	8.92503	9.28807	10.1793	8.47984	9.09769	9.97625	8.55703	8.65296	8.95657
CYB5A	1.16921	7.99258	11.5731	7.7245e-22	2.49529e-20	38.979	UP	8.76594	8.74838	8.567	9.19376	9.15438	8.74371	8.88337	9.11476	9.19909	9.03896	9.23798	8.9795	9.13504	9.112	9.25112	9.05241	9.01787	8.62786	8.55825	9.41197	8.69798	7.04976	7.35018	7.76358	7.88585	7.67158	8.49847	7.63603	7.32287	8.46213	8.34125	7.23536	6.72313	8.00446	7.54506	7.30028	6.9852	7.67505	7.6078	8.10379	7.47726	7.45445
CYB5R3	-1.47334	9.17191	-15.3311	3.8142e-31	5.83684e-29	60.2673	DOWN	8.00852	8.26906	7.77127	7.70276	8.01945	7.53541	8.01037	7.81374	7.91456	7.89871	7.62244	7.70637	7.78227	7.87143	7.76438	8.16919	8.04239	7.90792	8.30696	8.19292	8.28199	9.24277	10.03	9.48063	9.52643	9.63222	9.64153	9.86815	10.2513	9.08612	9.20804	9.80814	9.78615	8.88947	9.95371	9.75309	10.4397	9.73847	9.79012	9.57363	10.03	10.3775
CYP1B1	-1.60195	5.52499	-8.6697	1.33984e-14	1.40448e-13	22.4516	DOWN	4.40876	3.90762	4.79351	4.24991	4.205	3.78807	3.76565	5.36853	3.86156	4.32192	4.50151	4.20659	4.13232	4.28952	3.88416	4.45885	3.61785	4.3779	3.54998	4.18093	3.86564	6.67748	6.48155	4.53682	5.84137	6.06492	6.09197	5.64763	6.08739	5.17897	4.72125	6.77907	6.57574	5.56869	6.29805	6.24674	5.40494	5.44821	6.23249	3.83125	7.04553	5.13724
CYP2B7P	1.05045	5.79569	5.82713	4.06697e-08	1.61454e-07	7.7627	UP	6.72906	5.6237	6.90172	7.45296	6.71128	6.97161	6.30609	6.53836	7.23895	6.93841	7.33356	6.06448	7.74819	6.05933	6.8739	7.17023	6.86936	5.84232	6.26057	7.20297	5.42234	6.25619	6.20557	6.36032	4.89844	5.33644	5.28897	5.53433	4.7812	6.10811	5.42581	5.08778	4.75914	6.3897	5.09816	5.84592	5.79847	5.9718	4.78263	8.33746	5.0454	4.85079
CYP2C18	3.74521	6.92801	9.13408	9.77617e-16	1.21709e-14	25.0423	UP	10.2797	10.435	10.3233	10.2288	8.96204	10.2976	9.81946	10.24	9.96989	10.0934	10.1485	10.6343	10.0053	9.53786	10.2684	10.014	9.86056	9.93252	10.3349	10.3432	9.89661	3.71547	3.81228	6.53664	4.52376	6.41726	8.98862	4.63459	5.51444	8.40446	9.40137	6.21576	4.01426	6.00816	6.34354	4.3782	4.41658	6.44753	4.37385	5.93682	3.31749	5.05015
CYP2C19	2.23406	5.27831	18.6467	7.29281e-39	3.92035e-36	77.9081	UP	7.06263	7.59968	7.77699	5.73389	6.55188	7.49783	7.0646	7.93405	6.25212	7.44144	7.82956	7.37762	7.94043	7.17673	6.83384	6.97768	7.25048	6.37724	7.06598	7.40823	7.14309	4.57964	4.45828	4.96663	4.85841	4.49127	5.85501	4.50769	4.49243	5.39278	5.36122	4.60647	4.22555	4.97648	4.92733	4.44825	4.96975	5.2043	4.35099	4.73423	4.35177	5.41379
CYP2C9	1.79406	6.00356	7.80142	1.61847e-12	1.25023e-11	17.7149	UP	7.25519	7.565	7.40843	7.6154	7.43279	7.45002	7.29494	7.75431	7.58263	7.72745	7.56679	7.86458	7.45936	7.7081	7.43952	7.18418	7.6362	7.19919	7.71624	7.54181	7.354	4.27899	4.87349	5.48752	4.95059	6.1458	6.79067	4.40653	4.68255	7.04	7.07729	6.4409	4.46597	5.7865	5.39892	4.08108	5.37466	5.40461	3.96344	4.96175	4.27078	5.9465
CYP2J2	1.20938	6.40661	5.23884	6.19531e-07	2.04866e-06	5.11167	UP	7.81207	8.10974	6.48339	6.82931	7.009	7.11695	7.35995	7.52923	7.2594	7.62054	7.15885	7.4513	8.50257	7.23975	7.08985	6.9568	7.27621	6.91651	8.08385	7.67307	8.4169	6.20691	5.84079	8.19957	5.15266	5.74402	6.31211	7.72212	5.65973	7.4568	7.04271	4.62122	6.74479	6.91773	6.19979	6.71778	6.06885	6.19994	6.4872	7.11225	4.73411	5.06463
CYP3A5	2.10197	7.34689	6.91436	1.80136e-10	1.02875e-09	13.0733	UP	8.96351	8.6704	8.93054	9.4045	8.70436	9.36485	8.78498	9.21731	9.09845	9.65706	9.07726	9.40469	8.98563	9.47455	8.95597	9.13924	8.93829	8.69768	9.32484	9.1745	9.43495	6.80188	4.93833	7.21963	5.81008	7.07128	7.86618	7.86155	5.46452	8.48795	8.36512	6.13599	6.24717	6.42353	7.63097	7.73643	4.90003	8.20573	4.15522	5.67657	3.39487	6.98248
CYP4F12	1.38181	7.19245	9.35719	2.75112e-16	3.74128e-15	26.2981	UP	8.35507	8.35922	8.07684	8.22146	7.86199	8.46341	8.21932	8.42284	8.26114	8.44711	8.56867	8.24208	8.59069	8.12365	8.57961	8.16529	8.14728	8.37242	8.84456	8.43704	8.68326	7.15216	6.75682	8.27175	6.43272	6.41308	7.51368	6.74668	6.27425	7.44058	7.53379	6.38534	6.34711	6.70299	6.73232	6.79098	7.37024	6.35864	6.2673	7.18204	5.999	7.50112
CYP4F3	2.51093	5.10164	8.26227	1.29454e-13	1.16631e-12	20.2091	UP	7.33954	7.48013	6.81536	7.11234	6.06994	7.61997	7.41504	7.64702	7.35307	7.22214	7.02476	6.84278	7.5658	7.01958	7.60334	7.02014	7.03897	6.95694	7.11258	7.38906	7.82675	4.64139	4.01661	6.98685	4.04719	3.81572	4.7321	4.72501	2.90641	6.66925	6.00384	4.14695	7.06803	8.04712	4.39648	4.35987	3.64219	3.97952	2.87959	7.62898	3.54945	3.51968
CYR61	-4.20974	8.99368	-16.2793	2.07548e-33	4.48582e-31	65.4453	DOWN	6.55879	4.89389	4.56708	5.40105	5.18312	6.2209	5.07313	4.58985	4.95276	4.7747	5.64968	5.87366	5.75785	5.36842	5.11627	4.85746	6.92058	4.68559	6.12786	5.46241	6.49202	10.2783	10.7873	8.63585	9.85433	10.281	10.1462	9.48647	10.1258	8.27429	8.43165	11.814	10.7865	10.0874	9.06326	9.02677	10.2951	10.8492	9.47381	7.75429	12.2941	10.0762
CYSTM1	1.80786	11.8723	7.88944	1.0027e-12	8.01125e-12	18.1874	UP	13.077	13.2079	13.4422	13.5287	13.5996	13.4249	13.4608	13.604	13.531	13.5099	13.4083	13.4988	13.2772	13.3549	13.6254	13.4473	13.4355	13.3396	13.1718	13.5402	12.7595	9.99382	9.42957	11.6372	10.4482	11.2759	13.1999	11.2596	10.8785	13.1396	13.0195	10.8881	9.94962	11.1055	12.3494	11.2805	10.5335	12.1719	10.2385	11.4599	9.54568	12.5668
CYTIP	1.32984	7.82958	6.13365	9.24732e-09	4.06863e-08	9.21017	UP	8.77997	8.70353	9.15282	9.23359	9.16137	8.91579	8.91071	9.15041	9.41458	9.40376	9.48784	9.27998	8.68751	8.78394	9.30242	8.96192	8.92802	8.90794	7.6927	9.24967	7.79654	8.67102	7.02267	7.13381	7.31992	7.33443	8.93282	6.58166	7.73104	7.86205	8.45532	8.62502	8.31617	6.18417	6.28212	6.1931	4.55595	7.41064	8.18608	6.00936	6.61291	7.16754
DAB2	-1.53159	5.53175	-9.98439	7.5803e-18	1.31231e-16	29.8576	DOWN	3.90486	4.35896	4.26811	4.35516	4.2869	4.32935	4.29913	3.92634	4.51999	3.80383	3.92646	3.96514	4.11145	4.62328	3.877	4.79345	4.24649	4.83333	4.44109	3.7797	4.47042	5.75758	6.13024	5.62623	4.8315	5.53226	5.46937	6.29292	4.89277	5.85521	5.6059	5.79921	5.80357	5.0558	5.7769	6.31798	4.63754	5.72712	5.73733	5.06352	6.86246	6.1147
DAPK2	1.24392	6.3802	13.8272	1.79246e-27	1.44534e-25	51.8672	UP	6.87132	6.97588	7.43812	7.57565	6.75345	7.659	7.22752	7.66492	7.19531	7.83089	7.66342	7.65187	7.88082	6.93914	7.89129	7.61616	7.42487	7.47165	7.67516	7.49023	7.0541	6.41904	6.41928	6.08354	5.61371	5.79194	6.37213	6.29028	6.03854	6.71443	6.93426	5.7269	5.40526	5.52341	6.27346	6.37326	6.68994	5.97834	5.76119	6.95178	5.7535	6.27937
DAZ4	1.75783	5.388	2.47722	0.0144999	0.0228599	-4.39294	UP	9.42907	9.67689	2.94128	2.95329	10.5544	9.22447	2.8769	11.2344	2.94769	10.8292	2.93588	2.74014	2.93826	2.85768	2.94447	9.04684	10.5355	8.97238	8.98037	10.6043	8.96631	2.86649	3.14036	3.00862	7.81589	7.7737	10.0315	2.91455	9.835	2.9858	10.7024	2.68533	2.87777	2.76174	3.10293	3.11258	5.97676	8.52301	8.19895	6.06809	3.05117	2.95906
DBN1	-1.29759	6.81653	-9.07699	1.35097e-15	1.64956e-14	24.7221	DOWN	5.63755	5.52706	5.65233	6.18337	6.93665	5.51909	5.6053	5.88391	6.06973	5.31335	5.21011	5.69326	5.54853	5.59731	5.50512	6.01581	5.71101	5.87623	5.5313	5.52058	5.69521	6.82007	7.4706	6.74197	6.46973	7.09062	7.18915	7.50262	8.33533	6.92188	6.60003	7.53958	7.20804	7.50434	7.30177	7.6315	8.78893	7.34592	7.77271	7.23315	7.65542	7.50051
DBR1	1.00698	6.94863	7.18084	4.47771e-11	2.77573e-10	14.4426	UP	7.86512	8.268	8.23373	7.17658	7.26905	8.18333	7.64358	7.69012	7.85407	7.91591	8.17874	8.15341	7.6851	8.02824	7.7375	7.88104	7.77258	8.14849	6.84686	7.87965	7.29251	6.29992	5.76263	6.10091	6.71408	6.76473	6.25953	6.41151	6.26527	6.7266	7.61281	6.58041	6.23395	7.51223	6.82862	7.49688	4.85793	7.15145	6.92594	6.90732	6.19968	5.84144
DCAF15	-1.02112	5.56269	-17.5349	2.44165e-36	8.25632e-34	72.1412	DOWN	4.61048	4.65774	4.86798	4.82762	4.65349	4.75102	4.71648	4.79144	4.76654	4.69626	4.53771	4.75581	4.56611	4.70055	4.72149	4.54429	4.76868	4.65374	4.79002	4.55666	4.85026	5.89862	5.84117	5.68824	6.06497	5.88525	5.8418	5.83238	6.2494	5.78247	5.7772	5.71861	5.92214	5.7225	5.81758	5.94025	6.61404	5.66423	5.66509	6.20285	5.61896	5.70992
DDR2	-2.17052	7.27932	-9.45931	1.53689e-16	2.18743e-15	26.8749	DOWN	5.24197	5.13941	5.57542	5.55573	5.59355	5.55285	5.50666	5.306	5.64301	5.26877	5.50621	5.46521	5.5126	5.85781	5.20619	5.63119	5.45167	5.51929	5.26538	5.40993	5.32751	8.07198	8.79041	7.02706	7.15014	8.1028	7.4424	7.85059	7.15145	6.70767	6.60426	8.95649	8.68984	7.00247	8.84602	8.10335	7.41559	8.32036	8.13176	5.09942	9.14092	8.09091
DDTL	1.1011	8.28743	9.79404	2.26284e-17	3.61588e-16	28.7734	UP	9.22373	9.41369	8.75508	9.0198	9.2331	8.81248	9.25377	9.04826	9.16796	9.46513	9.1049	8.89414	9.49227	8.9165	9.0274	9.17457	9.44465	9.11486	9.85284	8.94707	10.1184	7.49921	7.76203	8.46975	8.04771	7.83733	8.21132	8.58773	8.0847	8.60479	8.65119	7.73441	7.85118	8.43099	8.32314	7.64447	7.93138	8.48661	8.21419	9.72762	7.73856	7.50737
DDX60	2.55632	8.75448	10.4475	5.24689e-19	1.08269e-17	32.5063	UP	10.808	11.2376	11.4749	10.5551	10.2219	11.6345	10.6232	11.4781	10.4375	11.5794	10.9624	12.0985	10.9181	10.4037	11.162	10.2295	10.6668	10.6519	10.932	10.945	9.96628	7.97607	7.26449	7.54241	8.91442	7.79433	9.15907	7.4673	6.86626	8.96468	9.86726	7.85844	7.41198	7.15471	8.06021	6.84412	4.19838	8.34287	7.30118	7.4279	7.57567	8.0727
DDX60L	1.04161	5.77401	10.2557	1.58819e-18	3.05753e-17	31.4076	UP	6.71601	6.76229	6.98468	6.65911	6.15204	6.77716	6.47588	6.96287	6.51459	6.35729	6.37194	7.36181	6.43652	6.49239	6.86635	6.55637	6.8869	6.39265	7.09041	6.14624	6.68463	5.56872	5.18069	5.69914	5.85394	5.50752	5.43711	5.05187	4.44528	5.62195	5.90612	5.39296	5.29141	4.87997	5.5139	5.26485	4.60367	5.81908	4.80642	4.60493	5.25281	5.27159
DEFB1	2.94422	6.02534	9.72903	3.28544e-17	5.13316e-16	28.4038	UP	7.34227	7.63108	7.6084	10.2427	9.59912	8.43201	7.55521	9.89612	7.61137	10.1812	9.79886	8.94585	9.44536	7.9225	9.39651	7.73995	8.25097	6.64581	7.6127	9.97095	6.6954	4.76852	4.26086	6.94508	7.43518	5.2217	5.83547	4.82197	5.23118	7.18634	7.13719	4.3463	3.60868	9.8719	5.7075	5.3534	4.29692	6.18001	4.00081	6.25229	4.07561	5.39328
DEGS2	1.09787	6.07008	6.60206	8.93928e-10	4.60132e-09	11.4998	UP	6.79533	7.14399	6.48148	6.77414	6.42022	7.15932	6.80907	7.21217	7.22464	7.16683	7.04588	7.20314	7.14323	7.12316	7.36372	6.84701	7.16404	6.87694	6.74439	7.15996	7.0004	5.68573	4.83664	6.85101	5.47546	5.55242	6.34222	6.30552	5.81268	7.1776	6.94165	5.71808	5.15672	5.66966	6.27517	6.72536	6.54519	6.38376	5.59067	6.48894	4.37632	5.04246
DENND2D	1.07893	6.84806	8.01218	5.12736e-13	4.24882e-12	18.8495	UP	7.71365	7.90812	7.98993	7.51094	7.74387	7.97	7.63891	7.75873	7.62116	7.60079	7.8365	8.05447	7.71296	7.72523	7.55491	7.8051	7.58464	7.71978	7.62789	8.11244	7.6722	7.98063	6.28602	6.97082	7.29954	6.6346	7.31664	6.32628	6.70365	7.13846	6.91049	6.5042	8.33208	7.42805	6.15458	6.47792	5.66688	6.22014	5.99151	6.66771	5.39913	6.09746
DENND5A	-1.38319	8.26052	-8.15212	2.37731e-13	2.06037e-12	19.6086	DOWN	6.72048	7.14689	7.26186	7.23687	7.67987	7.25954	7.10555	6.86665	7.32439	6.90984	7.0881	7.1905	6.93366	7.65102	6.44671	7.49693	6.7266	7.4927	6.55718	7.33075	6.619	8.83264	9.1431	7.74919	7.83103	8.99391	8.21482	9.33856	9.60288	7.7823	7.56455	9.3649	9.07315	8.85906	9.06414	9.07927	9.5167	9.04004	9.14478	7.77982	9.8479	8.72816
DES	-1.61345	5.70709	-6.36692	2.91905e-09	1.38677e-08	10.3393	DOWN	4.1223	4.27218	4.56963	4.33515	4.36236	4.19436	4.59246	4.16225	4.1851	4.2879	4.17743	4.25855	4.45304	4.62911	4.4373	4.47433	4.48847	4.18665	3.96318	4.68077	4.52435	6.82394	7.13509	3.32801	5.8982	6.82676	5.56646	7.27734	7.58265	5.29956	5.29971	7.01899	6.41874	5.76973	6.79659	6.6814	7.73105	7.00133	7.42944	4.1531	7.64124	4.35202
DFNA5	-1.46248	7.24324	-7.32759	2.06147e-11	1.34554e-10	15.2064	DOWN	5.68933	6.73658	5.80798	6.12886	7.58773	5.71872	5.74441	5.90764	5.01351	6.09098	5.37941	5.50886	6.80668	6.02275	5.85464	5.36973	5.75625	5.29003	6.66475	5.73014	7.47289	7.47965	7.77604	6.52981	7.12082	7.78594	6.85682	7.57834	7.65495	7.04492	6.2221	7.98944	8.15368	9.31667	7.55164	7.9389	7.21035	7.96966	8.23756	7.89853	7.98035	8.76322
DGKA	-1.30597	6.42415	-8.78466	7.02905e-15	7.63148e-14	23.0898	DOWN	6.27515	6.2008	5.40237	4.76747	4.46805	5.15178	5.80799	4.61151	4.53522	4.77578	4.67912	4.90224	5.73282	4.50158	5.11327	5.31125	5.54489	5.01691	7.2076	4.8086	7.03053	8.33983	6.55536	8.0931	5.99104	6.44027	6.49661	6.33052	7.16788	6.42726	7.07794	7.37294	6.71077	6.49443	6.2865	6.54089	7.12959	6.74269	6.17088	7.16447	6.46536	6.30382
DGKD	1.7141	8.23171	13.1143	1.05403e-25	6.55717e-24	47.8192	UP	9.02324	9.18957	9.70435	10.4843	10.2832	9.77888	9.74241	9.70116	10.2717	10.0853	9.9075	9.79609	9.20488	9.68944	9.80445	10.1758	9.55763	9.90184	8.66659	9.81268	8.35414	7.8527	7.92835	7.79411	7.71446	7.63628	9.41056	7.95087	8.45557	8.69345	8.80388	7.94531	7.845	7.93799	8.00337	7.45889	8.4591	8.4004	7.44354	8.56965	7.77358	8.96937
DHCR24	1.77138	8.49245	7.41972	1.26278e-11	8.4962e-11	15.6892	UP	9.84011	10.1971	9.8771	9.7937	10.6395	9.48174	10.0465	10.3642	10.2087	10.4477	9.79452	9.71626	9.91583	9.70922	9.97981	9.72746	9.78017	9.86952	10.2402	10.0462	9.94673	7.94899	6.8679	8.40195	9.1147	7.94308	9.31579	9.01676	8.42921	8.46173	9.03982	6.98209	7.36995	10.1313	9.32126	9.04927	7.91125	8.79569	8.08398	9.78504	6.60249	8.75531
DHFR	1.05973	6.88272	6.62055	8.13799e-10	4.20955e-09	11.592	UP	8.25871	8.30419	7.75016	6.48854	6.8157	7.66455	8.29133	7.84498	7.61918	8.2245	7.94385	7.95926	7.69722	6.90381	8.20611	7.46877	8.30662	7.94501	7.8561	7.44018	8.26234	6.20704	6.08341	6.55962	7.76384	6.70354	6.07366	6.15969	6.68412	6.90388	7.24281	6.30331	6.5984	6.81215	6.71287	6.49639	4.43597	6.63585	6.15983	7.45781	5.71923	6.60673
DHRS11	1.0522	6.99673	3.77551	0.000240092	0.000520853	-0.609425	UP	9.81066	9.02722	6.80815	6.5861	6.29857	7.39459	8.48646	6.63607	7.05078	7.68057	7.82839	7.18515	10.0025	6.72417	7.59942	7.81224	8.49527	6.52578	10.4962	6.78529	10.2788	6.08228	6.48622	8.79798	5.1635	6.68333	6.2731	8.08328	7.07985	7.57579	8.57537	5.90286	5.813	7.41945	6.57975	6.23947	7.75952	7.92154	5.8488	8.58282	5.3658	5.86231
DHRS7	1.19097	6.01645	15.9768	1.08378e-32	2.08454e-30	63.804	UP	6.7699	6.83369	6.56461	7.4784	7.72406	7.01454	6.94203	7.12054	7.23568	7.12849	7.15865	6.79656	7.02428	7.02871	7.22567	6.83651	7.10462	6.5445	6.718	7.36777	6.75977	5.55359	5.72546	5.68897	6.16482	5.73232	6.21145	5.74575	5.45842	6.35799	6.40016	5.78067	5.67836	5.39366	5.44004	5.80088	5.33906	5.68724	5.9342	6.08221	5.65255	6.12143
DHRS9	2.20383	6.55749	8.22459	1.59415e-13	1.41616e-12	20.0034	UP	9.37187	8.06659	8.99065	7.73964	7.06009	8.64083	8.07418	8.84487	7.6609	8.44737	8.39053	8.41121	8.24465	8.09521	8.11124	8.06673	8.59814	7.6339	10.3903	8.44643	9.33975	6.09707	5.37082	10.1257	5.58063	5.04702	7.09839	5.33374	6.1989	7.40046	8.76752	5.46493	4.93114	6.40775	5.32685	5.78775	4.96614	5.57188	6.81525	4.84259	6.22237	5.37807
DHTKD1	1.57471	7.10244	14.9829	2.65096e-30	3.4307e-28	58.3414	UP	8.32573	8.52519	8.50617	8.40634	8.37409	8.36131	8.42731	8.56279	8.45637	8.5501	8.43945	8.50985	8.32659	8.31819	8.4193	8.45654	8.6309	8.46998	8.31515	8.34307	8.23476	6.48	6.656	7.54301	7.52492	6.63806	7.31113	7.17615	6.41124	6.94513	7.12862	6.25731	6.31953	6.84306	6.97484	6.55145	6.27587	7.56243	6.09674	8.55978	6.19432	6.71789
DHX9	-1.01065	6.742	-9.91672	1.11857e-17	1.87757e-16	29.4718	DOWN	6.2518	6.29621	5.74114	5.48511	5.58844	5.7745	6.07123	5.79035	5.92536	5.65548	6.08948	5.96216	5.79156	5.9689	6.1383	5.89013	5.97197	5.63572	5.73241	5.99606	5.97853	6.74402	6.62331	6.78124	6.95	7.3991	6.27274	6.71486	6.30113	6.80924	6.90357	7.08044	6.63404	6.89988	6.58218	7.03557	5.13848	6.96232	6.68383	7.28071	6.85546	6.62921
DIO2	-1.10983	5.79048	-7.93486	7.8262e-13	6.32522e-12	18.432	DOWN	4.69619	4.91052	5.06238	4.8729	4.77818	5.23006	4.99684	4.75273	4.77043	4.48081	4.72704	4.68711	4.85881	5.17491	4.85721	4.70005	4.71489	4.91459	4.96255	5.0007	4.85262	6.31345	5.62016	6.03511	5.06218	7.16302	5.38972	5.53661	6.20598	6.26019	5.80799	6.46633	6.35343	5.75637	6.32494	6.65949	5.24591	5.13046	5.69057	5.16102	4.90529	6.08185
DISP1	1.77041	6.41121	12.5809	2.26912e-24	1.1377e-22	44.7698	UP	7.66146	7.66655	8.50693	7.76479	7.04146	8.40436	8.4138	8.73855	7.68966	8.41686	8.31517	8.27283	7.41348	7.87966	7.8566	7.66828	7.81764	7.90562	7.74013	7.79246	6.93292	5.16387	6.13036	5.43719	4.65451	6.11452	6.55815	6.12106	5.52819	6.68711	7.62597	6.11078	5.84662	5.78124	6.37263	5.81609	5.62499	6.45339	6.51868	5.55358	6.60498	7.17003
DISP2	1.29034	5.12222	9.9725	8.11647e-18	1.39363e-16	29.7899	UP	6.67335	6.31587	5.89486	6.30272	5.75034	7.10277	6.33468	6.67953	6.05953	6.60553	6.10237	6.61406	5.85096	5.39627	5.87706	5.83863	6.17874	5.52996	7.09466	6.123	6.02791	5.45367	4.61948	5.18126	4.26441	4.61239	4.79297	4.48494	4.83397	5.16584	5.86471	4.56528	5.42798	5.01788	4.77633	4.91404	6.84832	4.54788	4.90886	5.35765	5.39488	4.75784
DMPK	-1.19397	5.74017	-8.93937	2.94105e-15	3.40658e-14	23.952	DOWN	4.63458	4.69834	4.41389	4.93606	4.83533	4.58478	4.85693	4.98158	4.63241	4.93616	4.71792	4.65821	4.62453	4.79999	4.69621	4.71918	4.68522	4.6271	4.78784	4.72879	4.90415	6.09808	6.38388	5.32778	5.83196	6.25652	5.86014	6.45261	7.24737	5.63255	5.79134	6.33877	6.20885	5.56013	5.95765	6.20328	8.08451	6.38156	6.78338	5.51073	6.98572	6.53783
DNAJB5	-1.80445	5.78159	-8.10918	3.01104e-13	2.57449e-12	19.3752	DOWN	4.41042	4.28671	4.19213	4.25625	4.68553	4.44581	4.28226	3.97093	4.54026	4.1389	3.94864	4.21689	4.19148	4.33178	4.32685	4.1749	4.22448	4.23631	4.27497	3.97783	4.4352	6.22495	6.4546	5.30902	5.45401	6.37274	5.76259	7.05572	8.36199	5.02414	5.17625	7.19397	6.0218	5.21987	5.80327	6.07127	8.64823	7.26536	7.49343	5.03412	7.64336	6.23422
DNAJC22	1.31046	6.12204	9.2983	3.84674e-16	5.13347e-15	25.966	UP	7.56237	7.51701	7.06893	7.11133	7.16869	6.86302	7.18663	7.35443	6.96429	7.38619	7.23348	7.31284	7.58972	7.04936	7.42186	7.03755	7.08532	6.76444	7.5856	6.92544	7.51589	5.87639	5.51333	7.86869	6.62229	5.43389	6.20472	5.56807	5.46946	6.57518	6.73812	5.23116	5.80615	6.68362	5.7653	5.88503	5.5306	5.87898	5.45537	6.82396	4.28421	6.16256
DNER	1.02526	3.90426	3.4067	0.000870977	0.0017194	-1.8204	UP	3.16076	3.56754	3.34057	8.11942	9.94429	4.28694	3.44825	7.01407	6.65123	5.36483	3.8537	5.69817	3.23291	4.04905	3.51559	5.87528	3.23517	3.86244	2.97739	5.91236	2.98469	3.34057	3.70213	2.83109	3.01568	3.58973	3.62397	3.28947	4.39578	4.95168	4.51449	3.22548	4.3891	3.13106	3.28349	3.05671	3.49072	3.73643	4.1197	3.83278	3.9157	6.26408
DOK4	1.11669	6.55535	8.66872	1.34724e-14	1.41153e-13	22.4461	UP	7.80474	7.78245	7.29035	7.0718	7.10398	7.34272	7.78583	7.43755	7.24173	7.29005	7.25706	7.45168	7.4654	7.45298	7.72834	7.23628	7.44563	7.168	8.32827	7.53801	8.15917	5.82933	6.11798	7.55488	4.99906	6.25035	6.73454	6.0389	6.30442	6.93439	7.26989	6.06297	5.65939	6.57855	7.25168	6.32241	6.68365	6.72706	5.76682	7.87458	5.76997	6.92908
DOK5	-1.516	5.51627	-9.17925	7.56656e-16	9.60829e-15	25.296	DOWN	4.19705	4.30114	4.43107	4.1105	4.20848	4.20829	4.1908	4.22984	4.10995	4.15918	4.07538	4.12654	4.50728	4.18013	4.07621	4.31047	4.40244	4.44406	4.3768	3.89754	4.5273	6.79899	6.11759	5.91561	5.25903	6.18841	5.69728	5.83731	6.28961	5.24706	4.50698	6.19492	6.91486	5.38798	5.58541	6.84399	6.38692	5.915	6.35534	5.19663	7.20324	4.77391
DOPEY2	2.01661	4.98044	17.183	1.58671e-35	4.82107e-33	70.2837	UP	6.34158	6.57914	6.69344	6.88053	6.24349	6.85224	6.76693	6.94864	6.54843	6.80823	7.11917	6.77873	6.8322	7.01392	7.11099	6.72677	6.40482	6.35725	6.44867	6.88051	5.86516	4.7904	4.58007	5.0701	4.67001	4.14784	5.05898	5.08718	4.73126	5.69401	5.77976	4.05596	5.15228	4.97827	5.45589	5.27985	4.29987	4.54426	4.5297	5.30563	3.99198	5.63151
DPCR1	4.90887	7.84087	8.42138	5.35769e-14	5.101e-13	21.081	UP	11.8337	12.4006	12.518	11.5556	11.4907	11.9825	12.553	12.2585	11.5888	12.333	12.32	12.3921	11.3953	12.5745	12.3283	11.7028	12.1083	12.0038	11.1749	12.5303	10.2996	3.777	4.04741	6.69271	4.07662	4.72023	10.3107	4.60847	4.12261	9.71609	11.7077	4.90849	3.76735	4.32986	8.12322	5.29054	4.72508	8.00729	4.3231	6.76088	3.94468	8.6475
DPYSL3	-2.18249	6.67055	-9.37164	2.53373e-16	3.4839e-15	26.3796	DOWN	4.75385	4.70151	5.079	4.80589	4.76027	4.90203	4.91957	4.57645	4.7565	4.73818	4.85399	4.82104	5.0545	5.14964	4.74728	4.97764	4.61386	5.09986	4.42565	4.90676	4.89742	7.56295	8.42227	6.15191	6.55382	7.43253	6.67494	7.73974	8.00956	5.82712	5.81445	8.1694	8.21655	6.97359	7.49835	7.54068	8.19875	7.58615	7.73621	5.73152	9.28435	6.66221
DQX1	1.41961	6.1849	7.76063	2.01934e-12	1.53779e-11	17.4966	UP	8.05547	7.90057	7.47462	6.45655	6.30762	7.51457	7.67321	7.21715	7.16955	7.47111	7.01171	7.10513	7.95771	7.13248	7.42383	7.16882	7.26603	6.77246	8.35568	7.04746	8.47018	5.49466	4.93592	7.65875	6.69971	5.37493	4.98332	5.97278	6.10221	6.0862	7.1598	6.02018	6.28272	4.78213	5.46057	5.58792	6.13783	5.83565	5.50922	5.58012	4.57043	4.11492
DR1	1.18494	6.32786	16.6314	3.07208e-34	7.85442e-32	67.3422	UP	7.14586	7.27686	7.26085	7.18826	6.95792	7.44755	7.44613	7.34959	6.92083	7.66992	7.73512	7.59796	7.15412	7.59425	7.70125	7.16098	7.33555	7.23472	7.29582	7.25357	7.08282	6.07949	5.76558	6.21616	6.19001	5.83112	6.0226	5.78317	5.73881	6.22438	6.66593	5.9283	6.08641	5.8977	6.04052	5.89172	4.83177	6.20411	5.98161	6.24121	5.67855	6.67874
DRAP1	-1.30241	7.19269	-14.6637	1.58351e-29	1.83416e-27	56.5658	DOWN	6.12018	5.98629	5.96318	5.92519	6.0863	5.75591	6.04682	5.92794	5.81434	6.18858	6.22611	6.38073	6.17129	5.98142	6.24003	6.04323	6.1214	6.46564	6.23125	6.3225	6.04881	7.12573	7.5103	7.62961	7.61893	7.52448	7.35256	7.77702	7.9563	7.13317	7.02413	7.481	7.23394	7.72534	7.76177	7.60507	8.0836	7.60543	8.10788	7.78778	7.62816	6.73769
DSC2	1.93935	6.69139	7.43786	1.14631e-11	7.74797e-11	15.7845	UP	8.92211	8.45028	7.85233	8.3281	7.11197	8.2256	8.83265	8.42195	7.44938	8.26231	8.64935	7.79156	8.50397	8.95022	8.69705	7.81407	8.51058	7.74744	8.81894	8.245	9.1815	6.54975	5.11404	7.97294	7.70827	6.39021	6.59775	5.56565	5.75187	8.23671	8.62136	4.57329	5.37827	6.41878	5.29379	5.06477	4.52569	5.94037	5.7897	6.84096	4.80663	5.67577
DSP	1.62803	9.99123	5.85975	3.48056e-08	1.39602e-07	7.91469	UP	11.3127	11.253	11.2296	11.488	11.1581	11.422	11.3338	11.404	11.5044	11.3767	11.4588	11.2783	11.448	11.4	11.5136	11.3512	11.3959	11.1506	11.2082	11.6316	11.2471	9.48021	8.64051	8.77173	9.94816	9.59195	10.5696	9.86873	8.95477	10.748	11.0194	9.13327	9.34857	11.0685	9.43706	8.74933	8.09389	9.93148	9.18623	10.9664	4.53454	9.45732
DUOX2	2.05137	6.81064	4.49268	1.51624e-05	3.99597e-05	2.02371	UP	8.58929	7.77322	10.1916	10.062	8.28788	7.4841	7.3031	9.32976	8.94784	8.45951	7.81058	8.77495	8.54519	7.265	7.25315	8.36297	9.05875	10.0722	9.20495	9.50167	6.97118	5.76451	4.11901	8.46868	3.73847	5.39108	10.9512	4.59232	6.57531	11.3723	6.73483	4.07408	3.76591	7.35191	8.96211	9.80504	5.35094	7.60124	6.31578	7.20861	4.18589	8.01882
DUSP1	-1.74873	7.74025	-14.6265	1.95178e-29	2.18819e-27	56.358	DOWN	6.3342	6.22983	6.44111	6.09214	6.16536	6.25106	6.15288	6.38928	6.16472	6.18392	6.31862	6.26284	6.49561	6.06326	6.10494	6.15506	6.34164	5.91436	6.79828	6.08228	6.72288	8.18804	8.83018	7.30544	7.83441	8.11877	8.41862	7.72074	8.22967	7.48182	7.00247	8.67588	8.36608	7.99322	7.7801	8.09942	8.4532	8.40374	8.06293	7.40546	10.048	8.18181
DUSP14	-1.37364	6.74019	-11.181	7.50408e-21	2.05383e-19	36.7215	DOWN	5.52182	5.50735	5.36113	5.74036	5.83838	5.34203	5.61422	5.67827	5.64037	5.43499	5.48715	5.41494	5.73656	5.37578	5.36725	5.8292	6.03365	5.6172	5.33143	5.58774	5.82703	6.32357	7.50729	6.99877	7.98512	7.06298	6.60355	7.097	7.61737	6.49854	6.40695	7.25898	6.78238	7.36033	6.90043	7.29876	7.80338	6.94092	7.3954	7.93467	8.41664	7.42872
DUSP2	-1.16149	6.3574	-6.98818	1.22769e-10	7.16154e-10	13.4503	DOWN	5.24533	5.71653	5.97748	5.29937	5.45305	5.21457	5.47287	5.58938	5.2668	5.22477	5.51739	5.59169	5.26325	5.28752	5.16636	5.39176	5.44636	5.65769	5.1646	4.92867	5.11909	7.02865	6.56991	6.03813	6.63087	6.38308	6.75353	5.52954	7.47421	6.01986	5.72874	6.82702	6.15157	6.49586	5.63553	5.72847	6.82159	6.43091	6.45929	6.72683	7.19435	7.04362
DUSP4	1.17229	7.43632	4.99231	1.84304e-06	5.66808e-06	4.05529	UP	8.13922	7.77177	9.4027	9.27838	9.27849	8.81996	8.59875	8.72488	8.13247	7.71668	7.95091	8.45294	8.26096	8.90272	8.34654	8.42362	8.76054	8.4656	8.22244	7.84529	7.36953	5.42912	5.09581	6.27001	7.99913	8.58387	8.165	7.35877	8.13288	8.51661	8.35217	5.60647	6.25073	6.64115	6.33928	6.13718	6.43823	7.39028	7.0168	6.189	5.02168	7.92938
DUXAP10	-1.05209	4.45154	-3.71793	0.000295406	0.000631443	-0.805189	DOWN	3.66917	3.80998	4.03746	3.85512	3.34521	2.93276	4.01943	3.17306	3.58616	3.26419	3.55824	3.08342	3.60057	3.42551	4.00955	3.56691	3.83289	4.08006	3.38755	3.22093	3.44505	3.84749	4.13455	3.88624	6.17476	3.60532	4.07368	4.57089	3.4358	3.13063	3.11736	3.97049	3.55289	6.3911	5.32878	3.79702	3.64376	4.84987	4.88317	5.7239	3.03539	2.9274
DYSF	-1.06581	7.38787	-8.97509	2.40385e-15	2.82652e-14	24.1516	DOWN	6.43939	6.34985	6.61082	6.5811	6.53644	6.55042	6.48129	6.25677	6.38995	6.27801	6.10945	6.50934	6.66226	6.8337	6.3098	6.76821	6.50447	6.90275	6.52942	6.21249	6.50818	7.44232	8.10348	7.35916	7.29125	7.66084	7.72614	8.35266	8.55209	6.87657	7.19096	8.61254	7.59126	7.44146	7.94198	8.09456	9.67974	7.59619	8.15379	7.87276	8.32943	6.77688
E2F8	1.09527	6.43244	4.35146	2.67944e-05	6.80291e-05	1.47772	UP	7.54532	7.75808	7.74844	6.39155	6.97929	7.34117	7.67872	7.72211	7.31717	7.94508	7.56435	7.21358	7.12907	7.12011	7.96567	7.32535	7.8268	8.01066	6.01045	6.44936	7.38033	5.53544	5.7897	6.12752	5.43539	6.90832	6.85392	6.60511	5.03428	6.09629	6.79134	5.34815	5.61709	5.7474	5.94429	6.31299	3.87299	6.75697	4.99726	7.67277	3.31801	5.18759
EAF1	1.45995	6.74541	11.8829	1.28355e-22	4.71831e-21	40.7613	UP	8.09229	8.13726	8.03304	7.4945	7.53593	8.02808	8.06205	7.79081	7.7023	7.95942	7.99353	8.19127	8.13017	8.33037	8.50607	7.9315	7.97965	7.75843	7.96559	7.88241	7.93044	6.52779	6.17768	6.5793	7.02154	6.76225	6.37021	6.33319	6.32042	6.82847	7.12645	6.62899	6.54768	7.26175	6.3888	6.14074	4.75143	6.85478	6.30747	5.90816	6.98787	5.52565
EBF1	-1.19252	5.41157	-6.03435	1.50068e-08	6.40955e-08	8.73663	DOWN	4.48753	4.13813	5.02437	4.62234	4.65323	4.46565	4.63331	4.20335	4.11751	4.16396	4.18598	4.19073	4.51479	4.75359	4.11928	5.00983	4.19718	4.86661	3.76817	4.42907	4.0396	5.84234	6.02917	4.84686	4.48966	5.95411	4.86076	5.98831	5.70289	4.69722	4.91234	6.60332	6.0324	4.84484	5.62181	5.78178	5.21839	6.06006	5.69199	4.40901	6.78047	4.64417
ECM1	-1.61384	7.80425	-10.4494	5.18932e-19	1.07292e-17	32.5172	DOWN	6.39709	6.82725	6.70086	6.14431	5.59325	6.59524	6.44033	6.64876	6.23825	6.68443	6.27322	6.21806	6.63279	6.34607	6.74539	6.25346	6.71734	6.55452	6.64292	6.13988	6.59691	7.70025	8.80269	9.27342	8.31962	7.89051	8.17806	7.89262	9.52269	7.62807	8.50611	8.26537	8.85338	7.411	8.16335	8.43315	9.35694	8.03732	8.38126	7.32428	8.67423	10.6756
EDEM3	1.1026	8.2401	7.06824	8.0848e-11	4.85111e-10	13.8612	UP	9.22376	9.25264	9.09115	9.25412	8.88363	9.06696	9.21797	9.19033	9.25167	9.34743	9.44623	9.0855	9.03941	9.0952	9.54688	9.24599	9.39463	8.8933	9.09327	9.07644	8.81647	7.64942	6.98049	7.90195	7.51317	8.49116	8.45386	7.56017	6.94493	8.65495	9.01762	7.44196	7.98161	7.60207	8.24542	8.20671	5.64464	8.2156	7.68887	7.67053	7.62009	7.73696
EDN3	1.55475	5.12689	7.61724	4.38161e-12	3.15563e-11	16.7325	UP	6.59778	6.70806	5.284	5.86643	5.65166	6.34835	6.43256	6.79363	5.71186	6.87392	7.16736	7.06031	6.95172	6.62183	7.01434	5.35787	6.09474	5.16749	6.90166	7.05941	7.45506	4.67807	4.30846	7.29162	4.5064	4.69187	4.14566	4.35752	4.56489	4.94972	5.91055	3.93296	4.11494	4.15526	5.70282	5.9884	4.78827	4.33044	5.45083	5.72373	4.31523	4.47568
EDNRA	-2.52137	6.79592	-9.93413	1.01204e-17	1.70971e-16	29.5711	DOWN	4.89554	4.62914	4.50702	5.15792	4.83238	4.4912	5.01053	4.38015	4.47549	4.5569	4.41598	4.35036	4.92621	4.68099	4.56708	5.0039	4.56408	4.81756	4.48876	4.46164	4.97648	7.40776	7.86192	6.29825	6.40469	8.03207	6.50105	8.72509	7.37809	6.37092	5.96921	8.6676	7.93544	6.87901	7.78018	8.0485	6.84704	8.96537	9.27293	5.6293	9.11351	5.03735
EEF1A2	1.06146	5.50274	7.52906	7.03735e-12	4.92944e-11	16.2654	UP	6.053	6.25664	6.8028	6.70697	6.72696	6.04273	6.20409	6.76861	6.93598	6.63287	6.95388	5.97103	6.01336	6.57131	6.55353	6.09301	6.85007	6.29165	5.46853	6.54925	5.8556	5.05959	5.36214	5.19956	4.65219	5.47497	5.41043	5.16613	5.7733	5.24821	5.6719	4.96156	4.95175	4.61915	9.0978	5.09816	6.02856	5.39607	5.57043	5.22786	5.69895	6.36902
EFEMP2	-1.38463	7.89424	-7.08241	7.5071e-11	4.52e-10	13.9341	DOWN	6.62046	6.44126	6.8733	6.826	6.67252	6.98628	6.53735	6.62302	6.76157	6.47898	6.79504	6.7765	6.69574	7.02027	6.57294	7.0693	6.66439	7.19275	6.37407	6.9151	6.43094	8.19769	8.91117	8.02086	7.56254	8.52461	7.96523	8.72671	9.42115	7.48555	7.03297	9.05497	9.16769	8.42435	8.51158	8.82825	10.31	8.54049	9.03092	7.17406	9.53474	8.64867
EFHD1	-1.14928	6.36031	-6.5137	1.3979e-09	6.97621e-09	11.0611	DOWN	5.16295	5.57535	5.50478	5.84968	5.65457	5.61077	4.93825	5.13634	5.42324	4.93681	5.40458	5.41963	5.17913	6.08354	5.45035	5.48273	4.87764	5.39382	5.54202	5.73585	4.90922	6.0603	6.92008	6.08947	5.66422	6.47461	6.33794	7.32177	7.06817	5.88231	5.84097	7.3739	7.56164	6.14343	7.32806	6.48732	8.21943	6.27872	6.84072	9.62882	6.87928	6.1187
EGFL6	-1.2825	5.5448	-5.04438	1.46788e-06	4.58472e-06	4.27555	DOWN	4.06043	4.23701	4.08804	5.00445	5.53524	4.13876	4.28752	4.57267	5.29988	4.80316	4.10431	4.68283	4.2994	3.97966	4.02887	5.28264	4.31161	4.48513	4.13547	4.75634	3.69959	3.96001	5.93828	6.29353	6.50624	6.56255	5.95757	5.19698	6.85932	5.93412	5.23601	6.80127	5.57228	5.27466	5.69814	5.52029	4.20547	5.97354	5.79365	7.63828	5.74782	4.30227
EGLN3	1.36995	6.1609	9.73861	3.10988e-17	4.88014e-16	28.4582	UP	7.19667	7.25693	6.96754	7.39395	7.1984	7.24758	7.38334	7.59387	7.32374	7.26763	7.37045	7.20402	6.90792	7.76263	7.47062	6.96472	7.25994	7.18545	7.29857	7.73509	7.58173	6.58859	5.12034	5.98945	6.04407	5.17104	6.29905	6.53559	6.06919	6.62202	6.3496	5.39618	5.51622	4.88652	6.11072	5.81956	5.81618	6.08116	6.42437	5.81247	6.01414	5.383
EGR1	-3.0892	8.93655	-16.5696	4.29171e-34	1.0574e-31	67.0102	DOWN	6.52461	5.74321	6.2804	5.93932	6.14013	6.635	7.03353	5.73954	6.52312	6.01245	6.02955	6.76225	6.33354	6.31438	6.5857	6.43094	7.04675	6.85107	6.37057	5.74737	6.07151	9.94257	9.94565	7.94489	9.0994	9.93971	10.0557	9.37458	10.1473	8.62092	7.90993	10.7023	9.91511	11.2193	8.83545	9.70319	10.2544	10.1363	8.67861	8.94254	11.3692	9.94599
EGR2	-2.49471	6.71987	-12.0833	4.02084e-23	1.66595e-21	41.9142	DOWN	4.46982	3.65505	5.50045	4.36705	4.76346	4.24963	4.10525	4.38304	4.12926	4.18561	4.60505	5.13218	5.08634	5.05797	4.04812	4.74744	4.48692	5.56679	4.77295	4.49975	5.2509	7.86575	7.04417	5.76161	7.01365	7.17747	6.92194	7.13074	7.78752	6.61692	5.56067	8.55248	9.09258	7.71894	6.99175	6.80664	7.07503	7.42694	6.69027	5.57749	8.67543	7.30481
EGR3	-2.14376	6.67389	-9.0172	1.8948e-15	2.26221e-14	24.3872	DOWN	5.18775	4.76786	5.61678	4.60527	4.11971	5.56039	4.73763	5.01127	4.18455	4.51465	4.63031	4.77687	4.44701	5.40841	4.56891	4.80696	4.99138	5.82442	5.26149	4.86965	4.40373	7.45199	7.07193	5.32516	6.71588	7.31687	6.79694	6.6934	8.13083	6.82765	6.62462	8.88966	7.79043	8.14156	6.66694	7.13513	6.99457	8.25283	6.33313	5.09369	10.1938	7.33109
EHHADH	1.79749	5.65364	11.6542	4.82718e-22	1.61923e-20	39.4458	UP	7.60503	6.6125	7.05127	6.67441	6.87884	7.1908	6.84222	6.98625	6.89697	7.11847	7.30882	7.01909	7.8639	6.8645	7.31282	7.16447	7.51309	6.97666	8.05229	6.91975	7.61623	5.69012	4.58242	5.43858	5.39724	5.34092	5.52176	4.82589	4.65394	5.82784	6.25256	5.12676	5.38397	6.14479	4.54398	5.68143	3.13403	6.12221	5.38757	6.11634	4.71374	5.2014
EI24	1.12146	8.39259	12.4537	4.72578e-24	2.24662e-22	44.041	UP	9.40483	9.42329	9.19781	9.23332	9.42262	9.29862	9.55875	9.40515	9.45025	9.45502	9.51137	9.14764	9.21062	9.12598	9.54488	9.20929	9.37751	9.34791	8.89497	9.54412	9.28435	7.86896	7.45054	8.33798	8.77432	8.34246	8.05213	7.75391	8.60708	8.46631	8.58524	7.70354	7.84071	6.96732	8.04365	8.23892	8.75568	7.94789	8.18381	8.61299	7.86376	7.96481
ELF3	1.23762	8.40396	4.39638	2.23852e-05	5.74636e-05	1.64998	UP	9.24371	9.25287	9.56938	9.35735	8.84795	9.60986	9.23589	9.67182	9.24454	9.52293	9.57831	9.8121	9.58042	9.32249	9.41196	9.33575	9.475	9.50086	9.69624	9.71071	9.35828	8.97762	6.71395	8.29606	8.40683	9.20857	8.94686	8.86271	8.08669	9.45981	8.72543	6.88203	9.00748	9.70035	9.61328	9.44742	7.61315	8.43644	7.60156	9.78018	3.67762	6.91197
ELK3	-1.07197	7.05796	-9.37752	2.45025e-16	3.37957e-15	26.4128	DOWN	6.40731	6.14627	6.52396	6.42388	6.18412	5.98928	6.15249	6.1596	5.9539	5.98141	5.88617	6.0996	6.27006	6.276	6.07967	6.32066	6.18193	6.18116	6.02307	6.04755	5.99907	7.40124	7.66411	7.12634	7.10455	7.54911	7.18047	7.3776	7.27625	6.93097	6.51487	7.90078	7.43334	7.04773	7.63678	7.44827	6.73428	7.43898	6.99692	6.52127	8.20413	7.62051
ELMO1	-1.04382	5.93316	-6.45785	1.85166e-09	9.07224e-09	10.7855	DOWN	5.34581	5.04422	5.54389	5.22328	5.12007	5.05873	4.99151	4.83923	4.68548	4.9706	5.0316	4.81085	5.16949	5.31209	4.92612	4.9717	5.11026	5.84813	4.78002	4.69923	4.68123	6.46308	6.50123	5.80809	5.61064	6.24488	6.06406	6.50501	6.81161	5.54073	5.48188	6.97511	6.45192	5.40134	5.81245	5.71644	6.52912	6.0889	6.49897	5.77999	6.76669	5.45315
ELN	-1.46894	6.67546	-8.94009	2.92909e-15	3.3946e-14	23.956	DOWN	5.47609	5.53665	5.47296	5.21451	5.13535	5.65478	5.54211	5.43515	5.4863	5.40604	5.58467	5.26736	5.47498	5.35356	5.2971	5.47557	5.60879	5.50561	5.4593	5.59408	5.26354	7.29177	7.6308	7.73249	6.69246	8.03432	6.74774	7.53209	7.77622	6.39667	6.12925	7.41486	7.82961	6.85716	7.59666	8.06229	8.27418	7.16144	7.11768	6.60767	8.15605	7.55105
ELOVL6	2.90977	6.63931	13.3598	2.58125e-26	1.74006e-24	49.217	UP	8.61646	9.23297	9.23522	8.60597	8.44127	9.26425	9.45324	9.62888	8.54808	9.4409	9.37232	9.0456	8.92768	9.28217	9.44128	8.71187	9.28272	9.14788	8.8191	9.59544	8.716	5.5329	5.10212	6.77535	7.20114	4.92935	7.21138	5.63906	4.62025	7.71066	7.72174	5.19011	5.0831	5.35414	5.77152	5.57468	4.42452	6.57031	4.8864	6.36344	5.12809	6.31788
EMILIN1	-1.19681	7.45588	-5.03274	1.5447e-06	4.80985e-06	4.22617	DOWN	6.39433	6.32386	6.57001	6.3294	6.17311	6.42954	6.38618	6.21271	6.19386	6.2933	6.31352	6.39013	6.78105	6.81122	6.27944	6.46101	6.72011	7.09283	6.46139	6.34626	6.47564	7.7902	8.77558	7.55835	7.00045	8.51046	7.2955	8.60501	9.5902	6.70681	6.82406	9.28679	8.89824	7.17581	8.05161	8.47937	10.1282	8.58199	8.66711	5.6426	9.71636	8.91007
EMILIN3	-1.03174	7.06103	-9.07027	1.40332e-15	1.70752e-14	24.6844	DOWN	5.90464	6.37001	6.12837	6.49228	6.56209	6.0657	6.01619	6.12032	6.11146	6.42618	6.10912	6.05272	6.53761	6.16997	6.00593	6.42336	6.36784	5.92315	6.05841	5.93432	6.28239	6.83659	7.01852	7.50656	6.42474	7.29329	7.08298	7.70884	7.16056	7.53058	6.99965	7.1342	7.37023	8.62474	7.58027	8.02818	8.35129	7.58346	6.87593	7.86046	7.04595	7.51183
EMP1	-1.00126	6.37761	-7.15503	5.12875e-11	3.15228e-10	14.309	DOWN	6.17464	5.793	5.09453	5.05034	4.80236	5.52726	5.91219	5.37527	4.73967	5.62213	5.45548	5.58781	5.83002	5.4272	5.76233	5.48692	5.56196	5.15067	6.48222	5.20287	6.20964	6.56741	6.45843	6.63862	6.476	6.68676	6.0919	6.23663	6.02973	5.87158	6.55903	6.93338	6.86509	6.44487	6.37355	6.44055	6.07759	6.89551	6.04045	5.78443	8.67383	6.51005
EMP3	-2.77716	8.44902	-16.5247	5.47434e-34	1.27522e-31	66.7686	DOWN	6.02958	6.0479	6.36989	6.83854	5.42426	6.2694	6.13835	5.53991	6.19948	5.88652	6.16576	6.3419	6.42228	6.15011	5.71229	6.19171	6.06789	6.99252	5.80722	5.78189	6.00974	8.59903	9.51883	8.52043	8.96983	8.97081	8.71829	9.26733	10.3023	8.03476	8.12158	9.52767	8.90401	8.46648	8.67261	9.22933	10.4613	9.49351	10.434	8.04697	10.0129	10.6577
ENG	-1.35025	7.12358	-9.77402	2.53832e-17	4.01933e-16	28.6595	DOWN	6.14778	5.93423	6.19792	6.39923	5.87106	5.82651	5.87356	5.79739	5.97882	5.57898	5.71333	5.98904	6.05517	6.04742	5.88497	5.90977	5.86354	6.56882	6.14473	5.96556	6.00322	7.67825	7.9669	7.35466	6.97411	7.95225	7.56737	8.20573	8.65444	6.95286	6.79416	8.51708	8.15122	7.13034	7.81096	7.83431	9.19196	7.2912	7.76992	7.43637	8.48497	7.56179
ENPEP	-1.4279	4.64919	-5.71288	6.99036e-08	2.66994e-07	7.23429	DOWN	3.08952	4.4698	2.84646	2.94867	3.12142	2.83951	3.52866	3.28472	3.11233	3.22855	3.2846	3.00823	8.04743	2.90935	3.0816	2.91681	3.14372	2.84621	4.26979	3.26923	3.17098	5.3901	5.27555	4.21938	4.26855	4.64993	4.35163	5.25778	4.67061	4.01022	3.25952	5.7636	5.71218	5.15651	5.12946	5.11607	3.73941	5.18696	4.90327	4.28246	6.78093	3.58764
ENPP6	1.50906	2.93182	21.5773	3.40271e-45	3.96321e-42	92.3467	UP	5.19157	3.75026	4.65832	3.9525	3.93028	4.07135	4.33382	3.88771	3.96673	3.83471	3.77364	3.96801	4.58067	5.21818	3.79684	4.11116	4.3977	4.24294	4.29338	4.01092	4.24605	2.49773	2.53679	2.47129	2.62555	2.43212	2.84241	2.55976	2.70595	2.98718	3.40363	2.48292	2.46193	2.2518	2.94168	2.55986	2.50237	2.50574	2.66998	2.76733	2.66732	2.87441
ENTPD1	-1.06767	6.84862	-9.41814	1.94373e-16	2.70946e-15	26.6422	DOWN	6.35042	6.05522	6.37394	5.66884	5.62751	6.04241	5.98161	5.79723	5.6544	5.49202	5.93295	6.23516	6.16041	5.90459	5.59425	5.75802	5.8198	6.42664	6.10036	5.92443	6.06678	6.98984	7.28861	7.13397	6.68671	7.6003	6.70015	7.21371	7.09287	6.38171	6.4394	7.99826	7.39405	6.54444	7.35747	7.13977	6.10272	7.05174	7.38407	6.48306	7.22679	6.94477
ENTPD3	1.46639	4.13805	12.9459	2.77237e-25	1.6056e-23	46.8583	UP	5.252	5.26429	5.75794	4.93425	4.84478	5.61512	5.23743	5.92642	5.35916	5.73573	5.79865	5.44636	5.13778	5.27051	5.64039	5.14156	5.6216	5.40342	5.18149	5.8615	4.36376	3.81977	3.78901	3.25864	3.36729	3.69619	4.21261	3.76541	3.64056	4.71905	5.34758	3.38081	3.73208	3.884	3.76327	3.59027	3.99846	3.94449	4.30095	3.96928	3.75175	3.62404
ENTPD5	1.42801	5.49664	10.9073	3.66636e-20	8.99009e-19	35.1468	UP	6.41127	6.59554	6.46836	6.96345	6.3241	6.91078	7.07853	6.77155	6.82603	6.83701	7.22326	6.3961	6.91654	6.68019	7.05942	6.37387	6.88032	6.15135	6.59346	6.86802	6.31771	5.15667	4.67537	5.97945	4.83603	4.79402	5.8568	4.94372	4.68626	5.96517	6.33469	5.01059	5.33206	5.69677	5.3091	4.74621	5.03834	4.97269	4.73303	6.08309	4.66647	4.87238
EP300	1.45704	5.56068	14.691	1.35858e-29	1.58829e-27	56.7179	UP	6.55204	6.83525	7.12586	6.36413	6.56996	7.68513	6.9893	6.19196	6.91125	6.39383	6.92238	6.82564	7.26675	7.20371	6.51635	6.27251	7.00311	7.05225	7.03451	6.22733	6.56093	5.12006	4.78442	4.91456	5.69542	5.10442	5.12686	5.27501	4.6553	5.26307	5.71844	4.92174	5.01199	5.54965	5.29578	5.06548	4.5662	5.64194	4.84499	5.46272	4.88648	5.02323
EPB41L3	-1.05671	5.87146	-5.71469	6.93093e-08	2.64917e-07	7.24262	DOWN	4.56142	4.91173	5.2743	4.16378	4.16597	4.59107	4.43296	4.32303	4.68243	5.06811	4.55023	5.24318	7.68856	4.95719	5.32452	4.58025	5.27882	5.60691	5.63153	4.96332	4.64079	6.35123	6.87663	4.93116	5.99209	6.34022	5.99732	6.45577	6.42931	5.56327	5.36669	6.36982	6.90829	5.32499	5.89504	5.79489	4.41984	6.74236	7.11305	5.73012	7.87811	5.57668
EPB41L4B	1.33294	5.23194	9.89085	1.2979e-17	2.15956e-16	29.3244	UP	6.41386	6.41869	6.04665	6.41663	6.08811	6.28468	6.50728	6.52749	6.18715	6.53498	6.49265	6.33648	6.31533	6.19348	6.39845	6.18643	6.39295	5.90554	6.60495	6.4954	6.66202	5.5469	4.50086	6.0283	5.09902	4.66592	5.63152	5.16654	4.60211	5.77193	6.00789	4.14708	5.43456	4.89662	5.30477	4.47077	4.56214	4.9485	4.56983	5.87688	4.25795	5.11882
EPHA3	-1.01173	4.19199	-6.0599	1.3254e-08	5.69988e-08	8.85808	DOWN	3.15462	3.39432	3.51042	3.47303	3.32695	3.43537	3.47197	3.12448	3.12943	3.11375	3.31756	3.45365	3.54554	3.6318	3.28307	3.54777	3.08848	3.59312	2.97534	3.3414	3.25343	4.71671	4.25906	3.76278	3.69245	4.90608	3.4084	4.75649	5.001	3.32821	3.82151	5.26048	5.27189	4.10455	4.56498	5.31238	4.1719	4.46802	4.69581	2.9262	5.19705	3.42753
EPHX1	-2.81337	8.19025	-17.6936	1.05463e-36	3.87899e-34	72.9742	DOWN	5.26593	5.71319	5.89399	6.32314	6.23127	6.08234	5.87718	5.50878	6.41025	5.90975	5.92756	5.36484	6.00342	5.75074	5.77205	5.9868	5.88092	5.54522	5.23102	5.99064	5.64458	8.61596	9.29553	8.16724	7.70904	8.67385	9.28026	9.19811	9.5832	8.22476	8.60531	9.33517	8.23279	8.9888	8.69024	8.72284	10.4941	9.66171	9.37401	8.22496	9.7321	9.82484
EPHX2	1.05736	7.08911	5.49755	1.90876e-07	6.79525e-07	6.25579	UP	8.15261	8.45588	7.37442	7.36002	7.092	7.78116	8.10898	7.62561	7.99678	7.98743	8.16801	8.19026	8.64989	7.87039	7.68981	8.12726	7.94574	7.24612	9.00748	7.62522	9.08837	7.40378	6.32771	8.02469	5.72919	7.12931	6.92375	8.19482	7.19255	7.41363	8.19815	7.42125	6.66944	7.961	6.76494	5.42441	7.8556	8.12825	6.62357	8.28206	6.86438	7.03353
EPN3	1.39752	6.11182	7.21389	3.76209e-11	2.35932e-10	14.614	UP	6.87105	7.18545	7.16287	7.6593	8.08078	7.30818	7.28093	7.57666	7.22745	7.81151	7.51336	7.00349	7.08676	7.1099	7.33567	7.38434	7.19813	7.32531	7.00785	7.28151	6.61674	5.18732	4.97877	6.05593	5.05336	5.49279	7.21892	6.10324	5.39276	7.00405	6.58047	4.65621	4.56111	4.78829	6.04972	6.3649	5.64346	7.15528	5.01831	8.2771	4.51585	6.65862
EPS8L1	1.15995	6.82255	7.34787	1.85102e-11	1.21537e-10	15.3124	UP	8.02034	8.2287	8.02332	7.13038	7.27316	7.98208	8.00492	8.11693	7.04882	7.94012	7.62196	7.89617	7.40872	8.02841	7.86278	7.49455	7.64458	8.00362	8.55344	7.54056	7.93364	6.19125	5.74431	7.19329	7.0526	6.04608	7.35875	5.80763	6.91466	7.24773	7.78796	5.78686	5.65672	6.91737	7.06372	7.4656	6.80726	7.19486	5.76819	6.06144	5.44203	6.42105
ERAL1	-1.06835	7.14315	-11.9486	8.77052e-23	3.35536e-21	41.1396	DOWN	6.23446	6.33765	6.07005	6.29129	6.07064	6.42573	6.52471	6.21396	5.79721	6.18996	6.48268	6.24568	6.22752	6.13015	6.26336	6.29871	6.11061	6.37284	6.37016	5.84775	6.63491	6.96107	7.79698	7.34144	7.31481	7.54626	7.12179	7.46396	8.01781	7.47306	7.51129	7.01429	7.08434	7.68484	7.26371	7.65311	7.98822	7.53829	7.79867	7.98138	7.13663	7.42681
ERI3	-2.22379	6.37175	-29.5565	3.51116e-60	1.84029e-56	126.327	DOWN	4.58921	4.95239	4.69065	4.15125	4.26803	4.39717	4.40427	4.36547	4.59376	5.06814	4.73608	4.5668	4.30522	4.29003	4.43707	4.59883	4.44354	4.43038	3.87634	4.32415	5.04794	6.84218	6.61518	6.8995	6.74267	6.71818	6.26874	6.9227	7.49668	6.77208	6.80002	6.66936	7.88147	6.76745	6.80703	6.73933	7.68706	6.92842	7.16821	6.74565	6.77823	7.14667
ERICH5	3.24824	4.49577	12.6083	1.93752e-24	9.83537e-23	44.9267	UP	6.44002	5.96268	6.93073	7.23313	7.24618	7.35455	7.20336	7.61187	6.51172	7.65053	8.29089	7.47244	7.47248	7.84459	8.06676	7.22857	7.48552	6.92287	5.96555	8.60111	6.27656	2.87342	2.8027	3.16163	3.02455	3.66518	4.33275	3.27187	3.13496	5.44727	6.18966	3.017	3.59364	6.52626	3.81144	5.02902	2.92429	4.18771	2.74326	3.99395	2.82445	3.23084
ERMAP	1.23823	5.17777	17.389	5.29305e-36	1.68135e-33	71.3733	UP	6.02466	6.01764	6.13955	6.322	6.56821	6.06722	5.99732	6.72792	6.37301	6.61503	6.56959	6.26804	5.89937	6.29467	6.26213	6.06984	6.09005	6.13498	5.6833	6.4089	6.06577	5.33085	5.02874	5.23102	4.97523	5.2607	4.99238	5.34413	5.23552	5.17226	5.43881	5.24256	5.57179	5.18198	4.65469	4.78041	5.187	5.03919	5.13991	5.38331	5.27065	5.40872
ERMP1	1.07553	7.56033	8.19236	1.90446e-13	1.6755e-12	19.8277	UP	8.27651	8.24847	8.17792	8.26371	9.04721	8.40556	8.60198	8.72544	8.72998	8.7531	8.54051	8.57123	8.33274	8.41102	8.80624	8.51142	8.51574	8.19313	7.86991	8.65711	8.12089	7.61412	7.24133	7.64925	8.55549	7.89599	7.81361	7.44026	7.12477	7.97495	8.27494	7.25109	6.81883	7.28074	7.24754	7.57808	5.78138	6.73908	7.32378	7.86683	6.25428	7.18502
ERO1B	1.61497	5.84274	8.53393	2.86239e-14	2.83601e-13	21.7008	UP	6.81271	5.99056	7.14135	7.07004	7.71348	7.44664	6.76215	7.37456	8.13367	6.9936	8.26312	7.1829	6.91532	8.01794	7.25272	7.42701	6.88415	7.61944	5.60395	8.83367	5.77757	5.08023	5.12642	4.47656	4.63855	5.77126	6.7965	4.9114	4.77556	5.65466	6.96785	5.68302	5.0886	5.68535	5.45214	5.30934	4.02382	6.16249	5.04901	5.16956	5.8206	7.3713
ESAM	-1.1212	6.62187	-7.22515	3.5451e-11	2.22924e-10	14.6725	DOWN	5.4618	5.3757	5.57018	5.79815	5.98287	5.84563	5.74687	5.79109	5.89692	5.492	5.81974	5.59517	5.47377	5.50546	5.71111	5.66042	5.71714	5.91232	5.42326	6.20362	5.27657	6.57292	7.83385	6.70405	6.18964	7.14751	6.91449	7.95208	7.64095	6.40933	6.50046	7.61615	7.21924	6.70956	7.82613	7.57923	8.58376	6.8854	7.40421	6.95424	7.87543	6.0132
ESRP1	1.34558	8.69345	4.68538	6.84043e-06	1.91698e-05	2.7892	UP	9.76501	9.8786	9.48715	9.73822	9.66658	9.78752	10.1575	9.9162	9.70595	9.98592	10.115	9.77809	9.49284	9.88263	10.0937	9.85016	9.77781	9.65129	9.79799	9.9141	9.88176	8.88953	6.89187	9.10659	9.23078	8.47845	8.83863	8.16483	8.26311	9.1705	9.69292	7.45676	8.10406	8.88431	8.55792	8.39124	5.47184	8.50002	8.15671	9.09292	4.15752	7.63695
ESRRG	2.31646	5.00349	6.06934	1.26588e-08	5.45847e-08	8.90301	UP	5.33444	6.76729	5.37985	9.38302	10.3967	6.97601	5.05383	8.46208	9.05012	7.11226	5.709	7.39666	6.46737	6.05261	5.38909	9.28352	6.25008	6.63832	5.94826	6.97965	5.94961	3.62455	3.83869	3.39278	3.2538	3.5505	8.92016	4.01465	4.44517	7.2759	6.89453	3.61692	3.54249	3.29926	3.57569	3.35098	3.8092	4.74399	3.49815	4.8331	3.99988	9.04031
ETFDH	1.50415	6.63274	10.7066	1.17228e-19	2.65983e-18	33.9933	UP	8.10172	8.17052	7.65879	7.32824	7.75408	7.50531	8.04213	8.14938	7.30829	7.86321	7.94106	7.73493	8.11046	7.98367	8.09983	7.79682	7.87949	7.35004	8.58658	7.60581	8.87898	5.59142	5.61435	7.51375	5.24693	5.80527	6.28458	6.12897	5.40451	6.93902	7.4709	6.17015	5.88581	6.19576	6.74338	5.84478	4.83223	6.93254	6.00828	6.33894	6.4442	6.71717
ETNK1	2.21469	6.92118	11.5324	9.77889e-22	3.09689e-20	38.7448	UP	8.68919	8.66081	9.00388	8.46259	8.28685	8.64454	8.75373	9.10953	8.51712	9.11591	9.15314	8.96997	8.6441	8.76198	9.14456	8.44856	8.90286	8.84608	8.8885	8.75642	8.69387	6.04122	5.0155	7.11179	6.08579	6.15184	7.13358	5.42028	5.77138	7.37682	7.98134	6.17084	6.21755	6.73347	6.44863	6.14727	4.52116	6.89532	6.15344	5.74204	5.50565	5.82061
EVI5	1.17753	5.17229	26.9077	1.51831e-55	5.30522e-52	115.853	UP	5.97887	5.93334	6.15089	6.30095	6.25906	6.15339	6.25564	6.19849	6.24156	6.2569	6.37137	5.9849	6.16938	6.4942	6.40638	6.08292	6.19094	6.17921	5.95096	6.08003	5.7729	4.97324	4.6985	5.01429	4.60423	4.84624	4.9855	4.95056	4.68571	5.2348	5.19267	4.87913	5.05108	5.20132	4.83571	4.88832	4.47486	4.87721	4.84017	4.72615	5.01343	4.99064
EYA2	1.73837	5.33499	8.51829	3.12343e-14	3.06999e-13	21.6145	UP	6.29126	6.76705	7.52968	7.11361	7.17432	7.31982	6.72793	6.86118	7.69207	7.36285	6.63045	7.15751	6.31101	6.87469	6.89913	6.86424	6.46545	7.60333	5.20487	7.26867	4.61375	6.0365	3.99655	4.29591	4.31538	5.08246	6.87852	4.64781	4.22142	7.16503	5.80929	4.13475	5.2117	4.32002	5.40154	7.11574	5.78463	5.95779	4.83177	5.36392	4.76638	5.82238
F2RL1	1.21429	8.19156	3.9044	0.000149744	0.000335511	-0.162524	UP	9.55319	9.47879	8.5629	9.01135	8.79308	9.35209	9.13659	9.29695	8.6551	9.38215	9.17802	9.48634	9.2394	9.67572	9.31896	9.08768	9.189	8.48909	9.87944	9.14031	9.55998	7.14077	5.81369	8.77135	8.19536	7.5377	8.64209	7.68062	7.29841	9.4976	9.57318	7.47216	6.94786	8.77571	7.90625	8.73416	5.11869	8.2015	6.16369	8.77394	4.02588	7.84767
F2RL2	-1.13943	4.9288	-7.67397	3.22703e-12	2.36721e-11	17.0342	DOWN	5.0736	4.39989	3.86083	3.53122	3.14214	4.06524	4.11121	3.69578	3.72788	3.62878	3.57459	3.44624	4.24253	3.86464	3.86293	4.12637	4.56142	3.97631	4.82809	3.34942	4.31445	5.30339	5.43291	5.64055	3.84492	5.72261	5.04808	4.99195	4.45681	5.14855	5.02827	6.24577	4.79874	4.85258	5.45451	5.34354	4.88876	5.18423	5.6959	4.54345	4.5622	6.99304
F5	1.23592	5.94078	4.37298	2.45864e-05	6.2776e-05	1.5601	UP	7.35931	7.25303	5.14579	7.26897	5.61422	7.25979	6.71471	6.5965	6.73646	6.68504	6.76669	8.07996	7.46396	6.57335	7.42538	6.90742	8.13023	5.31104	7.7064	7.41751	8.16593	4.42955	4.38777	4.65807	4.26073	4.18542	5.43772	5.01798	4.1244	5.61057	5.93731	4.46886	5.35143	7.88667	4.89884	6.12859	5.30102	7.5699	3.99434	7.06852	4.24488	3.92388
F8	-1.25413	6.19798	-6.90446	1.8961e-10	1.07962e-09	13.0229	DOWN	5.16635	4.79908	5.38387	4.92961	4.97307	4.87951	5.16238	5.76666	5.31188	5.3939	5.1263	5.33151	4.76248	5.25578	5.05293	5.52722	4.95531	5.43528	4.83036	5.41104	4.55611	6.57385	7.71757	4.94463	6.37527	6.93413	6.57685	7.04415	6.78103	6.44073	5.19738	6.71802	6.58811	6.9524	6.3465	6.19128	5.56685	7.24055	7.61926	5.46063	8.21694	6.96262
FA2H	1.71768	6.82002	6.87743	2.18072e-10	1.22999e-09	12.8854	UP	8.14081	7.91554	8.45454	8.27455	8.20149	8.2285	8.46941	8.83001	8.00034	8.45018	8.48123	8.16892	8.07837	8.63279	8.54908	8.27504	8.31232	8.05769	8.2731	8.39553	7.36381	6.67332	5.45138	8.38263	5.8744	6.17478	8.3896	5.80237	6.82236	8.09578	8.37804	5.69598	6.27353	6.01813	8.12685	6.26752	5.89469	7.33719	5.72156	6.87361	3.82726	7.37223
FABP1	1.40385	5.93228	2.72498	0.00729921	0.012154	-3.77758	UP	10.5957	9.9938	5.09466	3.74601	3.85607	4.66355	9.45606	5.02149	4.63163	8.08527	6.61292	6.587	10.592	4.87228	6.42296	7.80125	9.36658	3.86359	10.9777	6.27636	10.8517	6.23918	5.5505	9.40724	4.18658	3.8865	4.94413	5.99128	4.07628	5.34822	9.47856	3.61936	4.04369	8.95011	4.55723	4.65199	4.48404	7.62622	4.09937	8.75877	3.60241	3.78265
FABP4	-1.07663	5.83188	-3.55009	0.000533662	0.00109058	-1.36175	DOWN	4.56463	4.36194	4.71165	4.94474	5.76628	4.66863	4.70726	4.94958	5.10374	4.69502	4.64253	4.73611	4.78951	5.54003	5.00478	5.06409	4.75673	5.07663	4.03053	6.56064	4.78211	7.22046	7.44422	4.27734	4.64689	5.54816	7.07441	6.61906	5.99482	4.87661	5.7869	5.59587	6.87368	5.15565	5.62109	6.78413	6.70997	7.09249	7.47571	4.51802	10.3538	6.85898
FABP5	1.02224	10.5484	6.30376	3.9971e-09	1.86097e-08	10.0313	UP	11.5856	11.3789	10.7603	11.3955	11.6416	11.5218	11.909	11.7765	11.601	10.3902	12.0302	11.6899	10.8362	11.5226	11.8835	11.8179	11.7185	10.8695	10.5017	11.8725	10.8644	12.0474	10.3878	10.2709	10.3245	10.4437	10.1946	9.86031	10.7106	10.218	10.9813	9.77535	10.2947	9.64469	9.48284	9.53307	8.85582	10.5274	10.9604	9.35701	10.891	11.1268
FADS3	-1.4196	6.27072	-10.6579	1.55403e-19	3.47709e-18	33.7136	DOWN	4.88723	5.18626	5.75621	5.14378	5.33816	5.01081	5.0379	4.77763	5.14326	4.91414	4.69435	4.70894	5.00012	5.16839	5.04191	5.34629	4.99727	5.19634	5.09437	5.05308	5.11972	6.51286	7.00741	5.72576	7.59748	6.678	6.07439	7.16321	7.32985	5.95618	5.82567	7.30768	6.82262	7.14222	6.64556	6.92539	7.95663	6.45441	7.11939	6.83096	7.81414	5.81777
FAHD1	1.44066	6.91983	11.1335	9.88345e-21	2.65096e-19	36.4481	UP	8.65546	8.21537	7.40649	7.25148	8.24243	7.51833	8.62315	7.82816	7.5687	8.42416	7.76824	8.0943	8.89132	8.18021	8.81199	7.87407	8.09747	7.41501	8.91573	8.01762	8.95742	6.35329	5.97475	6.74171	7.1609	6.48737	6.74381	6.23902	6.44314	6.75831	6.88144	6.3861	6.129	6.8951	6.73916	6.59572	4.91579	7.28217	6.67024	6.15398	5.99977	6.54448
FAM110C	2.56787	6.81324	8.05343	4.08966e-13	3.43646e-12	19.0728	UP	8.69259	8.46868	8.50698	9.22426	8.77184	9.00215	8.92008	8.94262	9.20279	9.40281	9.60461	9.3574	9.14639	8.86024	9.32112	8.7743	8.80562	8.7541	8.82763	9.4428	8.39523	7.50558	5.208	6.18435	8.352	6.19011	7.17646	7.1062	4.29814	7.33437	7.36655	4.62183	8.66992	6.17316	7.15646	8.26996	4.04908	6.64523	5.60653	5.29954	2.90682	7.04127
FAM129A	-1.34477	8.52665	-5.63579	1.00405e-07	3.74086e-07	6.88135	DOWN	7.78271	7.66276	7.83529	7.67318	7.3523	7.45389	7.65492	6.58169	7.37273	6.94913	7.44972	7.40574	7.02167	7.43893	7.14754	7.50936	7.52795	7.82828	6.97754	7.20161	7.4852	9.28252	10.1768	6.56631	7.86739	9.30387	8.68371	9.99322	9.49061	7.355	8.43014	10.0813	8.95695	7.26927	8.83074	8.56169	8.70575	10.0966	10.1266	6.21175	10.6039	8.59044
FAM135A	1.18754	4.90608	12.0323	5.40369e-23	2.17444e-21	41.6206	UP	6.11858	6.26111	5.56055	5.62886	5.5076	5.69537	5.7667	5.66473	5.93281	5.63326	5.95003	6.07649	5.97209	5.8762	5.68172	5.94477	6.07063	5.80573	6.79886	5.61499	6.43742	4.17269	4.40592	5.30256	4.63049	4.42651	4.52828	4.64073	4.11498	4.8194	5.42377	4.47637	4.55481	5.01225	4.4729	4.60714	3.73524	4.79415	4.15972	4.05148	4.04842	4.23472
FAM162B	-1.17097	5.57511	-6.64067	7.34648e-10	3.83036e-09	11.6924	DOWN	4.80495	3.70726	4.55188	4.25646	5.27657	5.03194	4.75484	4.51384	4.7324	4.16815	4.5908	4.80761	4.8325	4.9532	4.39469	5.00743	4.0931	4.82775	4.15325	4.66875	4.27163	5.28136	6.67379	5.14419	4.47379	6.05181	5.34543	6.82729	6.96806	5.04003	5.65838	6.76708	5.45813	5.40247	5.94362	5.25469	6.72708	5.9446	7.12531	4.90286	7.05198	4.82346
FAM189A2	1.23256	6.23165	5.91474	2.67416e-08	1.09393e-07	8.17207	UP	6.33319	6.79107	7.35413	7.64299	8.12086	7.58715	7.06559	7.71333	7.8402	7.42636	7.60008	7.28191	6.8082	7.5114	7.12699	7.71652	6.8227	7.6384	6.28732	7.72555	6.23649	4.76637	5.99875	5.30525	5.08272	7.72342	6.94104	5.99603	6.96528	6.62782	6.84755	6.52862	5.88451	5.05835	6.12243	6.51297	7.15776	6.75377	5.57762	5.12814	6.0755	5.97758
FAM198B	-2.25197	7.43694	-12.6535	1.49294e-24	7.84447e-23	45.1857	DOWN	5.49304	5.22924	5.82541	5.47727	5.73537	5.35195	5.47794	5.48991	5.64737	5.31974	5.58927	5.47868	5.69614	5.74289	5.31274	5.68416	5.69061	5.91331	5.10096	5.60118	5.55078	8.20427	8.17494	7.90909	7.18994	8.29628	7.61241	7.95222	7.93335	6.82069	6.50437	8.96055	8.35382	7.33482	8.09376	8.14289	6.52767	8.22587	7.93314	5.76016	8.82171	8.32704
FAM221A	1.57024	7.96064	8.11984	2.83951e-13	2.43478e-12	19.4331	UP	9.054	8.54421	8.84214	9.83234	9.76346	9.23592	9.13656	9.32724	9.8356	9.60562	9.63033	9.98392	9.0191	9.25038	9.45493	9.45504	9.38674	8.95736	8.39407	9.56116	8.63246	8.05488	5.97053	7.94044	6.80204	7.5331	7.68968	7.01948	6.19923	7.72177	8.35166	7.39721	7.7748	7.22532	7.4469	6.38028	6.1374	7.91597	6.68636	7.41387	5.86763	7.79676
FAM3B	3.7982	8.44452	7.51237	7.69588e-12	5.34606e-11	16.1772	UP	10.7013	11.4837	11.5754	11.8124	11.9534	11.705	11.6489	12.0415	11.7244	11.783	11.7949	11.5249	11.7396	11.7194	11.7163	11.6535	11.7372	11.5733	11.1399	12.1106	11.269	6.53429	3.91403	10.2986	3.83576	6.96173	10.3307	9.1815	4.94286	11.1769	10.6125	4.51301	4.32505	8.98388	7.68203	4.70693	4.8422	9.45255	8.80756	10.5554	4.21743	9.14678
FAM3D	1.08772	7.85539	3.27024	0.00136961	0.00260514	-2.2421	UP	9.57565	9.11815	9.46881	8.26235	7.79132	8.27107	8.61601	8.99932	8.35528	7.98416	7.90356	8.51123	9.49638	8.18625	8.21228	8.61613	9.22433	9.56129	9.90953	8.39958	9.70867	9.31447	6.55861	9.3405	4.88497	7.68192	9.89488	8.33881	9.10324	9.49165	9.67474	6.86905	6.69024	5.20397	7.10055	8.41314	8.13733	8.25867	8.65611	6.41681	5.22077	7.91755
FAM46B	-1.3977	5.87594	-5.49023	1.97433e-07	7.01795e-07	6.22293	DOWN	4.5863	4.60833	4.82638	4.92627	4.59627	4.70265	4.52536	4.61077	4.94649	5.09867	4.57106	4.4849	4.70172	4.2914	4.60097	4.82638	5.15431	4.67423	4.24464	4.57888	5.15648	6.53563	7.07692	5.29548	5.74935	6.59198	5.18949	7.3418	9.14043	5.05431	5.35343	7.37148	5.75915	5.4111	6.17792	5.87995	9.29585	7.30659	8.49319	5.83759	8.15584	5.20555
FAM46C	1.56492	7.26221	8.44156	4.78888e-14	4.59282e-13	21.192	UP	8.77023	8.40137	9.13541	8.711	8.35398	8.62325	8.35126	8.34099	8.64809	8.4466	8.72074	8.78346	8.85404	8.52907	8.41606	8.48261	8.68221	8.97764	8.27868	8.3454	8.2893	6.27548	6.13116	6.63481	6.38681	6.76169	8.33465	6.46033	5.98097	6.60878	7.47272	7.39326	6.3004	5.11391	6.38407	6.30658	5.93808	7.37873	7.37783	6.13114	6.45849	6.84582
FAM83D	-1.51681	8.51004	-5.56452	1.39987e-07	5.10025e-07	6.55763	DOWN	7.55169	7.77214	7.33196	5.84806	6.35329	6.95429	7.81979	7.07242	6.99082	8.17613	7.35762	7.35948	7.31085	6.66019	7.8175	7.13101	7.81977	7.56434	6.75019	6.68631	7.59759	8.99985	10.7542	7.85809	8.99196	9.55935	7.55605	9.46544	10.0851	7.25485	7.46582	10.1958	9.04879	9.07866	9.44122	9.07467	10.1032	9.6518	9.90095	10.2664	10.8784	7.00981
FAM83E	1.51887	6.61413	8.8138	5.96704e-15	6.56688e-14	23.2518	UP	7.69324	7.99687	7.86492	7.48887	7.0124	8.4176	8.13927	8.25045	7.45923	8.06823	8.0479	8.1695	8.02062	8.04985	8.01642	7.69432	7.79515	7.96252	8.08103	7.68451	7.80575	6.2588	5.26017	6.90199	5.82719	6.33624	6.96775	6.38552	7.09428	6.94596	8.52357	5.89289	7.15883	6.11451	6.59854	6.86236	7.30265	7.27764	5.76305	6.14351	5.18026	5.47031
FAM83F	1.44749	5.59469	8.88991	3.8871e-15	4.4098e-14	23.676	UP	6.90322	6.66851	7.20374	6.52574	6.34627	6.90195	6.43961	7.18027	6.60312	7.13716	7.59292	6.87307	6.53835	6.24027	7.05212	6.28614	6.62235	7.0242	6.85172	7.0178	7.04116	5.09066	4.91177	6.42052	5.42813	4.18726	6.03918	5.32122	5.87306	6.46984	6.38322	4.21157	5.46899	5.15428	5.4207	5.63014	5.63991	5.27248	5.28719	7.51119	4.19076	4.91114
FAM86DP	-1.40114	6.4143	-11.7602	2.61152e-22	9.15561e-21	40.0559	DOWN	5.80399	5.18005	4.98745	5.09225	5.07644	5.39456	5.56203	4.77851	5.03806	4.98292	5.34629	5.05193	5.36039	5.07967	5.45553	5.34971	5.18465	5.4613	5.0308	5.26438	5.47655	6.32088	6.6168	7.10972	8.05929	6.75674	6.49543	7.05538	7.55986	7.01252	6.8799	7.13904	6.07408	6.5478	6.46839	6.4608	7.82956	6.71785	6.82133	6.99989	6.37085	6.65842
FANCL	1.03681	7.77595	8.73694	9.18991e-15	9.845e-14	22.8246	UP	8.66791	8.57711	8.62854	8.54166	8.30676	8.76638	8.60746	8.67599	8.72864	8.62285	8.87905	8.94162	8.66836	9.00454	9.00283	8.80144	8.74888	8.47695	8.01023	8.62721	8.31948	8.05552	7.04125	7.19435	8.70244	7.78224	7.20605	6.94287	6.62954	7.19834	7.71875	7.83029	8.01635	8.20682	7.10178	6.87028	5.14707	7.40723	6.68121	6.42216	7.24932	7.74942
FANK1	1.19813	4.794	6.78912	3.43818e-10	1.88202e-09	12.438	UP	5.11221	5.04888	5.55748	6.31465	6.03337	5.75777	5.51091	5.9453	6.09361	6.21722	6.20227	6.08253	5.49394	5.61367	5.90753	5.88355	6.36628	5.61458	5.68206	6.13782	5.25624	4.9954	4.60451	4.50222	4.00461	4.80212	5.06445	4.06467	3.87672	4.96585	4.57283	4.56726	4.60967	4.61337	4.30972	4.77389	4.54559	4.06597	4.6804	4.7106	3.8381	4.07717
FAP	-3.28414	7.04064	-11.9289	9.83005e-23	3.72671e-21	41.0263	DOWN	4.18702	4.67561	3.8491	4.43405	4.26835	4.22934	4.41254	4.06452	3.81668	4.2757	3.91293	4.11801	4.57344	3.9759	4.34011	4.45196	3.91718	4.32986	4.57414	3.97983	5.47236	8.01157	8.96393	8.47342	8.17692	8.10386	7.46901	7.43013	7.13254	7.36549	4.1738	8.81487	9.90127	7.87194	8.66426	8.97499	5.98646	7.20252	7.89499	4.95628	8.65544	6.37712
FAR1	1.06577	7.51294	7.7093	2.66623e-12	1.97937e-11	17.2224	UP	8.07216	8.31149	8.37524	8.36393	8.29566	8.542	8.41128	8.61746	8.51098	8.59276	8.65832	8.54206	8.21073	9.0626	8.36574	8.56096	8.58962	8.4067	7.83619	8.64041	7.62601	7.31816	6.39364	7.08737	7.39369	7.40738	7.65088	6.68587	5.99486	8.19565	8.31385	7.5706	6.75139	6.93215	7.02694	7.11991	4.8544	7.4956	6.271	6.29368	6.96166	7.4133
FBLN1	-1.07885	7.21255	-5.54268	1.54918e-07	5.6065e-07	6.45895	DOWN	6.11878	6.19115	6.53309	6.63196	6.43754	6.45153	6.3681	6.17554	6.29371	5.94246	6.17641	6.31608	6.44492	6.61762	6.00964	6.64263	6.19862	6.86988	5.45493	6.26473	6.27268	7.68908	8.28871	7.83547	6.36916	8.47827	7.64215	7.92011	8.66313	6.64801	6.99469	8.59918	7.88217	6.7413	7.21065	7.3563	9.28882	8.3561	7.88387	7.12247	8.21609	7.0393
FBLN2	-1.22205	6.31038	-6.48332	1.62909e-09	8.04756e-09	10.911	DOWN	5.26443	4.84415	5.01578	5.53671	5.27547	5.67276	5.57673	5.37054	5.5886	4.89693	4.93802	5.51646	5.25047	5.41818	5.60589	5.15598	4.99206	5.43353	4.97452	5.16809	5.44244	6.8471	7.09761	6.87954	6.29115	7.31223	6.61958	6.8043	7.16861	5.78194	6.01172	6.93964	7.36074	5.92467	6.39145	6.30702	7.74088	7.47584	7.32889	5.35184	8.34643	6.17041
FBLN5	-1.16713	7.81557	-5.50009	1.88649e-07	6.72451e-07	6.26721	DOWN	6.69338	6.71635	7.1029	6.55328	7.05238	6.94092	6.72201	6.74529	7.14517	6.78776	6.6636	6.66058	7.02835	6.91192	6.53371	7.05665	7.07286	7.38959	6.32001	7.18573	6.23407	9.07473	8.57905	7.94559	7.08441	9.18881	8.42217	8.55298	8.65407	7.66456	7.31729	9.40908	9.43916	7.35817	7.94669	8.1518	9.36353	7.93467	8.81207	7.036	9.29248	7.49959
FBN1	-1.75972	7.67528	-7.5018	8.14402e-12	5.62939e-11	16.1214	DOWN	6.24768	6.22716	6.29659	5.98457	5.93724	6.29748	6.41716	5.99034	5.78685	5.71072	6.21512	5.99388	6.44768	6.39524	6.32281	6.3369	6.38941	6.4746	6.24751	6.16229	6.22452	8.67626	8.69541	7.83426	7.5819	8.81485	8.00929	8.41748	8.17948	7.19989	6.57503	8.90223	9.27935	7.80888	8.44919	8.7279	7.19761	8.21594	7.78028	6.05431	9.81454	8.05315
FBP1	1.51531	8.712	6.99592	1.1792e-10	6.89209e-10	13.4899	UP	10.079	9.97067	9.94297	9.68978	9.49327	9.84044	10.1722	9.70261	9.98039	10.0617	10.0626	9.67574	10.4647	10.2424	9.83133	9.9947	10.2651	10.1056	9.55173	10.3276	10.2564	7.55821	7.51627	9.01676	9.2739	7.67351	9.29764	9.4235	7.87162	9.22529	9.40919	6.27083	6.87866	9.60508	7.72955	9.29719	7.98785	8.73107	9.61411	9.1056	6.2292	8.05933
FBP2	2.68277	5.5851	12.5472	2.75553e-24	1.36571e-22	44.5768	UP	7.16139	7.78177	7.59125	8.70679	8.52157	8.12395	7.84253	8.07747	8.70989	8.67453	8.19228	7.33753	7.45173	8.12015	8.05832	8.21817	7.59382	7.946	5.69576	8.82101	6.03651	4.40028	4.3797	4.81261	4.54626	4.08703	7.04264	5.17436	4.7712	6.76575	7.1496	4.11709	4.69348	4.85095	4.63232	4.484	5.52881	5.08394	4.83188	5.3745	4.71002	6.1548
FBXL22	-1.35848	5.39602	-5.68671	7.90729e-08	2.99289e-07	7.11413	DOWN	4.14595	4.09031	4.39335	4.36056	4.4866	4.05135	4.37179	4.26308	4.18518	3.98268	3.96771	4.2482	4.17655	4.42651	4.37257	4.63521	4.19927	3.97816	4.26961	4.30886	4.41353	5.71253	6.40359	4.90946	4.65392	6.18772	5.18136	7.12802	7.71784	4.91534	4.72371	6.9106	5.67059	4.68636	5.56076	5.57044	9.01977	6.50256	7.536	4.82309	8.18841	4.54205
FBXL4	1.33353	5.13413	14.4895	4.21942e-29	4.41727e-27	55.5921	UP	6.25577	5.66465	6.07182	6.20427	6.38844	6.18992	6.23356	6.5451	6.58381	6.26261	6.62324	6.61784	6.15384	6.6192	6.62008	6.56033	6.20277	6.19561	5.16029	6.63342	5.57897	4.7314	4.37341	4.5842	5.38725	4.96878	5.05566	4.75139	4.02713	5.27814	5.18166	5.1605	4.90889	5.02883	4.91034	4.67685	3.40014	4.81577	4.7003	4.07543	4.89287	5.19755
FBXL7	-1.01064	6.22211	-5.83252	3.96381e-08	1.57598e-07	7.78777	DOWN	5.34548	5.12705	5.38368	5.55855	5.4606	5.44845	5.59625	5.37038	5.26684	5.16374	5.64503	5.4502	5.28313	5.75007	4.8716	5.38463	5.21433	5.80215	4.92208	5.44823	5.32475	6.66811	7.044	6.21057	5.78609	6.62835	5.92113	6.89469	7.43553	5.34704	5.78476	7.44703	6.91636	5.88835	6.62608	6.73387	7.85323	6.98403	7.05477	5.60051	7.50761	7.96564
FBXO32	-1.59125	6.14578	-8.19152	1.91326e-13	1.68183e-12	19.8231	DOWN	4.86658	4.58933	4.82895	4.78906	4.92831	4.79154	4.63725	4.64266	5.02044	4.86697	4.70954	4.65359	4.82181	4.76213	4.56891	4.91793	4.7351	4.85831	5.24912	4.87465	4.84928	6.64964	7.6855	5.46364	5.97142	6.62672	6.12538	7.2273	6.18398	5.5615	5.3215	7.36755	7.73044	6.12109	7.32759	7.06119	6.77325	7.04412	7.51333	5.96036	7.31519	6.75477
FCER1G	-1.83819	7.99078	-10.5026	3.81499e-19	8.07891e-18	32.8225	DOWN	6.41724	6.23416	7.22708	6.02865	5.61874	6.58216	5.9907	6.27826	6.2605	6.01971	5.653	6.95924	6.68783	6.71387	6.0537	6.51077	6.42208	7.66747	7.04382	6.32865	6.64808	8.57182	8.65081	7.79346	9.05131	8.53817	8.19333	8.01368	8.45454	7.9323	7.1893	8.3467	8.94389	8.05019	7.93417	8.6052	7.69409	8.31501	10.3376	8.00676	9.70409	7.49865
FCGBP	3.2233	7.93195	6.52478	1.32186e-09	6.62351e-09	11.116	UP	10.8408	11.1883	11.2969	9.7454	10.0104	10.6023	10.8708	10.243	10.6434	11.0426	10.8374	8.25134	10.7097	10.729	10.7109	10.1756	10.9697	11.402	11.4624	10.1756	11.5841	11.3491	4.81385	7.73487	4.80891	5.76178	10.2473	8.16053	10.8318	10.8331	9.85472	6.45455	12.1577	5.27109	7.94915	8.8812	8.47605	9.00835	9.8134	6.59741	4.80008	6.78008
FCGR1B	-2.35304	6.54086	-10.458	4.93657e-19	1.02572e-17	32.5668	DOWN	4.18534	4.87082	6.01055	3.934	4.43035	4.56036	4.06742	4.31845	4.68791	4.22419	3.90512	6.11625	4.08446	3.98988	4.21529	3.78045	4.65466	6.07824	4.62519	3.98051	5.08595	7.35669	7.35742	5.50008	7.90113	7.33456	7.18024	7.45102	7.24552	6.09808	4.66866	6.49402	7.972	6.78706	6.94084	7.92015	5.74087	5.61165	8.47541	5.64957	8.13091	6.8103
FCGR1CP	-2.10859	6.41836	-9.29471	3.92629e-16	5.23298e-15	25.9458	DOWN	4.20422	4.92591	5.8457	4.70082	4.21588	4.40598	3.73945	4.21101	4.78232	4.53172	4.14918	5.99399	3.91788	4.34141	4.64894	3.95821	4.55065	5.92979	4.86427	4.65612	4.97638	7.26365	7.45065	5.8126	7.83581	7.2408	6.85582	7.2448	7.07497	6.13819	4.96559	6.4908	8.00233	6.99378	6.93089	7.43029	5.20061	5.72056	8.28108	5.76798	8.12072	6.60675
FCGR3B	-3.02354	6.88454	-12.8997	3.61654e-25	2.06035e-23	46.5942	DOWN	4.09898	4.64725	6.72689	3.69045	4.07939	3.93922	3.83416	4.26086	4.05973	4.379	3.61011	5.87057	3.6183	3.74763	3.67819	3.7385	4.37718	5.69826	4.56739	3.86662	4.69388	7.02399	8.49959	7.47876	8.99353	7.71425	8.55838	6.77065	7.05763	6.80297	6.30867	6.71339	8.19175	7.52321	7.05038	8.00205	4.41808	6.3472	8.15568	5.96163	8.46691	6.84361
FCMR	-1.6445	6.57263	-8.01677	5.00003e-13	4.15315e-12	18.8743	DOWN	5.49628	5.55797	6.56626	4.96588	5.31964	5.25736	4.81516	4.90506	4.7762	4.40642	4.52841	5.50073	5.41641	5.27391	5.07273	5.7114	5.17549	5.78882	5.34759	4.67424	4.42895	9.04243	7.3802	6.31318	6.70702	7.2539	7.62995	6.28909	8.69295	6.99364	6.69373	8.76141	7.64849	5.65988	6.00191	6.07235	7.41541	6.77438	7.64348	6.37242	5.91952	5.67491
FDCSP	-1.56386	5.65826	-3.96088	0.000121341	0.000276033	0.0370516	DOWN	3.23109	5.15354	8.9632	4.13077	3.6674	4.49614	3.82152	3.38889	3.58958	3.25701	3.23287	3.24876	6.0216	3.25484	3.91197	5.4924	3.84198	6.82535	5.1071	3.0799	3.49124	7.93341	6.69355	4.93795	7.46455	4.78657	6.3348	4.71661	7.42504	3.8629	6.31078	8.8759	5.60186	5.10779	5.77339	4.94716	4.59749	5.70273	5.98954	4.79534	3.24807	3.77017
FER1L4	1.92369	5.21626	14.3539	9.06047e-29	8.8763e-27	54.8328	UP	6.16501	6.42912	7.08153	7.40073	6.65877	7.37818	6.95196	6.93581	6.76697	6.92491	7.153	6.17196	6.7197	7.04189	7.11529	7.29504	7.33024	7.20464	6.44124	6.88471	5.46143	4.59086	4.42364	5.03699	4.43795	4.63794	5.59984	4.83025	4.17111	5.58789	5.75112	4.84242	4.09942	6.06102	4.44759	5.88539	5.15677	4.65481	4.07425	5.1898	4.89844	4.98064
FERMT2	-1.86524	7.99235	-7.76291	1.99453e-12	1.52055e-11	17.5088	DOWN	6.2591	6.10258	6.32304	6.74795	6.79837	6.26973	6.5299	6.1766	6.33102	6.16227	6.46742	6.51824	6.38266	6.96438	6.29093	6.81573	6.47019	6.49559	6.01085	6.61749	6.16684	8.55774	9.76902	7.31903	7.34482	8.91843	8.04073	9.21851	8.5703	7.2708	7.42598	9.61269	8.66406	8.13331	8.86482	8.79502	8.28328	9.44097	9.42165	6.36748	10.3573	7.78922
FEZ1	-1.04582	6.08251	-9.35402	2.80131e-16	3.80372e-15	26.2802	DOWN	5.33377	5.15212	5.2664	5.30443	5.29885	5.25012	5.12048	5.00497	5.10128	5.1278	5.01007	5.08078	5.35033	5.27067	5.03495	5.41428	5.04411	5.51448	5.21647	5.35157	5.01659	6.07095	6.95891	6.06292	5.7298	6.66746	6.28687	6.62733	6.9566	5.9095	5.63367	6.83005	6.41419	5.64943	6.53219	6.62219	7.52535	6.45277	6.80291	5.74225	7.1044	6.17457
FGF7P3	-1.35437	5.69836	-6.23199	5.70208e-09	2.59202e-08	9.68339	DOWN	4.41035	4.4051	4.26152	4.97893	4.90919	4.49603	4.53196	4.44999	4.60436	3.97352	4.67001	4.47836	4.38014	5.42144	4.83707	5.07867	4.53496	4.45781	3.67073	4.6794	4.51899	6.15185	7.11738	5.57758	4.77597	6.68471	5.59036	6.05016	6.02569	4.82887	5.22795	7.99138	5.79921	5.15226	5.79073	5.0898	4.69832	6.93413	6.52867	3.80625	7.85858	4.827
FGFBP1	1.31835	6.1848	5.26914	5.40664e-07	1.80634e-06	5.24383	UP	9.72707	9.27691	6.60653	5.08038	5.17208	6.10408	8.89756	8.34728	6.38049	7.87621	6.0185	5.67196	7.76192	5.51889	8.08221	7.61544	6.36628	5.93063	10.472	6.75819	9.49703	5.50163	5.16649	6.84256	6.57065	5.61706	5.41723	5.37777	7.04459	6.10592	7.24474	5.18032	5.66004	6.16004	5.57609	5.41223	5.88486	5.49631	5.00395	5.77827	5.79738	5.43778
FGR	-1.28361	6.32685	-9.63739	5.5537e-17	8.38856e-16	27.8835	DOWN	4.93489	5.22445	6.30954	5.39394	5.16095	5.22227	4.89899	4.99268	5.05653	4.78323	4.93088	5.56728	5.24794	5.35074	5.16372	4.99033	5.40982	6.20283	5.35725	4.79151	5.20669	6.77848	6.61926	6.31591	7.1652	6.59446	7.01078	6.88692	7.9101	6.24597	6.07902	6.45865	7.03206	5.72687	5.81519	6.60382	7.05778	6.01983	8.08543	6.00549	6.84509	5.81685
FHDC1	1.12844	7.1526	10.6364	1.75943e-19	3.89509e-18	33.5904	UP	7.71501	7.94384	8.17084	7.96222	8.08475	8.7578	7.65529	8.69672	7.93215	8.48582	8.61061	8.2044	8.12313	8.30701	8.56543	7.69419	7.61701	7.9666	7.68525	8.3259	7.62772	6.47614	6.54588	6.98087	7.11382	6.54981	6.92722	6.88748	6.49738	7.31704	7.49108	6.48508	6.6873	6.65004	7.3918	6.73663	7.21032	7.0814	6.37876	7.40353	6.67331	7.16668
FHL1	-1.63649	8.97392	-4.88674	2.91071e-06	8.66068e-06	3.61348	DOWN	7.50696	7.23977	7.51591	7.38375	7.45125	7.5541	8.01099	7.24243	7.60536	7.5421	7.66599	7.61431	7.70427	8.18193	7.42988	8.15388	7.53278	7.21009	7.11672	8.14497	7.74601	10.1718	10.7468	7.71471	7.55425	10.5308	9.19356	10.4876	10.7193	7.9469	9.1411	10.7983	9.38923	7.47933	9.4106	9.10264	10.2042	11.0683	10.8364	7.1337	11.137	10.4689
FHL5	-1.05973	3.91903	-7.37699	1.58556e-11	1.05127e-10	15.4649	DOWN	3.0609	3.06686	3.18441	3.14557	3.00602	3.0445	3.05723	2.96111	3.09566	2.95393	2.81167	2.94441	3.15822	3.17351	2.94551	2.89773	2.95552	3.0842	3.01156	3.05309	2.97404	3.93168	4.69621	3.50146	3.55656	4.34507	4.33043	4.37637	3.88374	3.24124	3.39631	4.78093	5.13093	3.64724	3.97074	4.39661	3.69555	4.30565	4.50898	3.43824	5.09136	4.1498
FIBIN	-1.54396	6.44186	-7.95285	7.09379e-13	5.76216e-12	18.529	DOWN	5.45172	5.21436	4.42679	4.8169	5.01644	5.64527	5.10357	4.55603	5.34527	4.90062	5.16556	5.13037	5.45032	5.0586	4.87309	5.54132	5.83961	5.15849	5.0365	4.92926	5.35413	6.99766	7.12046	7.12866	6.15967	6.73827	6.2571	6.93704	6.87599	6.2779	5.9678	7.62888	7.80841	5.87091	7.15469	7.02581	6.95583	6.84479	7.18844	4.653	7.841	7.28228
FILIP1	-1.53813	4.8203	-5.42276	2.69176e-07	9.37887e-07	5.92143	DOWN	3.41231	3.22766	3.67613	3.46375	3.48943	3.64948	3.57654	3.37767	3.42653	3.51561	3.46751	3.52461	3.60212	3.74044	3.46532	3.81151	3.48676	3.64163	3.30842	3.56905	3.63196	5.38745	6.19343	3.47238	3.79474	5.12328	4.02434	6.51375	5.15759	3.46129	3.81481	6.29127	5.01661	4.28338	6.06623	5.21478	4.37082	6.63827	6.60519	5.33842	7.72757	3.56971
FJX1	-1.49623	5.54833	-11.5708	7.83063e-22	2.5218e-20	38.9654	DOWN	5.16137	4.24064	4.26303	4.59199	4.23885	4.15904	4.27564	3.80479	4.10883	4.12665	3.93601	3.96264	3.72968	3.99869	4.23561	3.91844	4.97136	4.57727	4.99451	4.20717	4.59069	5.69681	5.8682	5.47935	5.73294	6.54997	5.8064	6.02369	7.20412	5.62872	4.872	6.671	5.82487	6.07087	6.13293	6.05613	6.60588	5.50966	5.85871	6.36127	6.89308	5.48312
FKBP10	-1.05099	6.71124	-5.37627	3.32843e-07	1.14394e-06	5.71504	DOWN	5.96501	6.15138	5.77063	5.71879	5.85732	5.93667	5.40524	5.89909	5.59997	6.04068	5.82673	5.6882	6.01619	5.7206	5.84905	5.76191	5.35259	6.40152	5.59952	5.89305	5.92232	5.39839	7.54629	6.21636	6.53007	6.14206	5.84726	6.45537	7.17098	5.95153	5.61124	6.49984	7.15397	7.29983	6.02563	6.70922	7.44859	5.90443	7.907	7.91313	6.59949	7.91515
FKBP1A	2.16098	8.89975	8.05115	4.14128e-13	3.47566e-12	19.0604	UP	10.7945	10.9194	10.8659	10.2146	9.96051	10.6104	10.8836	11.0332	9.96757	10.8506	10.7421	10.7695	10.6892	10.7417	10.8678	10.6846	10.7393	10.6334	11.3857	10.6747	11.0275	7.76323	6.98642	10.1857	8.7083	8.06374	9.88867	8.65095	7.56646	10.2116	10.4081	7.41405	6.72696	9.26247	9.233	8.37223	7.10265	8.73781	7.51438	10.1008	6.62998	7.77565
FKBP1B	1.93133	7.87611	9.03685	1.69548e-15	2.03584e-14	24.4972	UP	9.59103	9.86454	9.15245	9.06489	9.28712	9.31795	9.53159	9.68967	9.26667	9.55029	9.36647	9.29011	9.54011	9.34672	9.59701	9.0243	9.47733	8.95418	10.437	9.6743	10.4801	7.28447	5.74987	8.70744	8.10229	7.57248	8.00588	7.08768	7.14009	7.98977	8.53816	6.3231	7.10461	8.2961	7.0925	7.9293	6.6391	7.38703	7.89519	7.23595	6.33143	7.45943
FKBP5	-1.99723	7.59496	-11.0446	1.65458e-20	4.26147e-19	35.9366	DOWN	6.16973	6.47851	6.4709	5.05103	6.18942	5.65622	5.36992	5.81204	5.06828	5.45361	5.53989	5.94041	5.77628	6.83425	5.20396	5.56489	5.99659	6.46938	6.48855	6.28302	6.40797	8.35024	8.85354	7.43268	7.96601	7.78471	7.86262	8.00419	7.70011	6.93106	7.30275	8.6767	9.0823	7.23963	7.13074	7.61432	7.12788	7.88426	9.01854	6.7314	8.70186	9.60241
FKBP8	-1.07906	6.10977	-14.9394	3.37964e-30	4.29419e-28	58.1001	DOWN	5.17114	5.0451	5.21477	5.42063	5.27836	5.04132	5.16364	5.2452	5.23552	5.31747	5.06357	5.11651	5.14246	5.20315	5.31693	4.92903	5.22425	5.30654	5.34051	5.09412	5.37968	6.26416	6.49382	6.48315	6.44377	6.48172	6.57477	6.52369	7.03387	6.35716	6.47716	6.16678	6.40113	6.1091	6.17566	6.65474	7.77259	6.31487	6.76605	6.50795	6.5617	6.46382
FLJ16734	-1.02071	5.39967	-6.11612	1.00752e-08	4.40698e-08	9.12628	DOWN	4.56605	4.63767	4.59372	4.42607	4.8467	4.88981	4.36128	3.98654	4.76292	4.46447	4.60544	4.65127	4.17757	4.42648	4.61276	4.83424	4.65599	4.42548	4.08295	4.43121	4.92965	6.55025	4.69321	6.01791	4.57211	5.90937	4.82331	5.96457	5.4395	4.80418	5.71752	6.41848	5.4185	5.08506	4.5361	5.64677	5.31452	5.73621	5.68476	5.57749	5.5814	4.50576
FLJ22763	1.42488	3.81722	2.99043	0.00332236	0.00589384	-3.06052	UP	8.46499	9.10524	2.53428	2.59116	2.58059	2.50053	7.72169	2.55205	2.59849	7.17487	3.49013	3.63304	9.72311	2.48826	3.32146	4.0585	6.05515	2.32848	9.66884	2.45858	10.2741	3.26796	4.71938	4.40652	2.35209	2.34394	2.6153	4.16064	2.85244	3.2841	6.36629	2.61	3.65122	2.51036	2.66587	2.4047	2.38566	4.22266	2.52564	6.55865	2.65449	2.6665
FLJ23867	1.1351	7.06799	8.3718	7.05638e-14	6.57498e-13	20.8088	UP	8.02045	7.91175	7.99232	8.32558	8.19283	7.91566	8.27899	8.1639	8.35557	7.91019	8.07709	7.96466	7.56716	8.07858	8.28226	8.05656	8.00634	7.38216	8.09924	8.1311	7.76028	5.63647	6.617	7.04534	7.49148	6.54763	7.17906	7.03649	7.23946	7.70295	8.01555	6.08702	5.77886	6.0556	7.2269	7.60782	7.81928	7.18232	7.07934	6.73715	6.25637	6.82248
FLJ45482	1.30457	5.3158	9.636	5.5981e-17	8.44346e-16	27.8756	UP	6.33601	5.79242	6.83745	5.62868	5.79136	6.34721	6.55062	6.395	6.49521	6.99253	6.95296	6.28733	6.48045	7.128	6.52418	6.32025	6.38917	6.92084	5.78548	6.43927	6.27498	4.63311	5.11113	4.66796	5.69112	5.24673	4.9833	5.36309	4.39466	4.83962	5.38811	5.0001	6.0946	5.0417	5.25227	4.87232	4.37051	4.68746	4.46117	4.95287	4.73262	4.24442
FLNA	-2.74113	9.56511	-9.2653	4.641e-16	6.10405e-15	25.7801	DOWN	7.21148	6.99414	7.54586	7.48344	7.00298	7.23365	7.23798	6.90388	7.0132	6.96746	7.11062	7.21334	7.45865	7.76621	7.10903	7.68686	7.19803	7.52468	6.95489	7.46649	7.37847	10.7691	11.4469	8.79535	9.54144	11.1718	9.64648	11.7303	12.0584	8.8204	9.16259	11.7646	10.905	9.59915	10.7993	10.8132	12.7556	11.5155	11.6006	8.35392	12.0398	9.30374
FLNC	-1.27268	7.45949	-5.39525	3.05257e-07	1.05571e-06	5.79913	DOWN	6.41287	6.02648	6.22224	6.59974	6.78758	6.19764	6.58967	6.17149	5.98179	6.6846	6.63977	6.48316	6.11856	6.7476	6.46625	6.26658	6.65012	6.14299	6.20184	6.50307	6.28083	7.95746	8.32019	6.76681	7.08436	8.53342	7.27385	8.65986	9.9579	6.58036	6.66356	8.76367	7.92562	6.73133	8.06038	8.20149	10.7276	8.70438	8.98449	6.38717	9.66599	7.86953
FLVCR1	1.35377	6.86527	9.81883	1.96274e-17	3.16813e-16	28.9144	UP	7.91202	8.62102	8.32361	7.52215	7.16735	8.252	8.03741	8.12819	7.84218	8.2655	8.01284	7.71049	8.57304	7.48203	7.31525	7.89046	7.7449	8.5018	7.8027	8.12136	8.85078	6.45362	5.72811	5.94881	6.42186	6.72591	6.51598	6.337	5.22409	6.26015	6.9637	6.5781	5.82486	7.29791	6.33847	6.7799	5.14047	7.0247	5.75319	6.38108	5.80747	5.96572
FMNL2	-1.06928	5.76105	-13.7148	3.39978e-27	2.59187e-25	51.2312	DOWN	4.92885	4.81939	4.99613	4.87589	4.86699	4.87444	4.72434	4.81823	5.08854	4.80863	4.88929	4.6221	4.78102	5.03989	4.51445	4.79043	4.94008	5.23429	4.58194	4.96717	4.93752	5.99146	5.89696	5.44656	6.49694	6.1282	5.56874	5.62256	5.50813	5.55379	5.6489	6.01092	6.14609	6.10093	6.15557	6.34861	5.21579	5.8046	6.25127	5.93523	5.83289	5.99893
FMO1	-2.49278	6.14584	-9.37005	2.55678e-16	3.50804e-15	26.3706	DOWN	3.78461	3.97414	4.45818	3.96786	3.72958	4.27133	3.66247	4.70987	3.57939	3.84094	3.95639	4.00496	4.3777	3.85413	3.91316	4.3365	4.3477	3.83175	4.01104	4.05825	4.37245	7.18457	7.31038	6.97264	5.56015	7.1581	6.23851	5.94537	8.17938	5.87202	4.28558	7.61271	7.47077	8.06917	5.47942	5.20174	6.02867	5.71147	7.93614	5.45331	8.7535	5.13713
FMO2	-2.07339	6.19556	-8.2922	1.09699e-13	1.00123e-12	20.3727	DOWN	3.85112	4.88081	4.40602	4.31261	5.15012	4.22749	4.39112	4.31215	4.1788	4.3734	4.40513	4.40521	4.26577	4.41392	4.18448	4.81648	4.50715	4.88852	4.29584	4.70682	4.51965	7.0064	7.76043	6.32442	5.54171	6.1991	6.74831	7.33654	5.97842	5.6937	4.78367	7.96774	8.26747	6.09296	6.79736	5.975	5.86894	6.14043	6.86945	4.89271	7.84281	5.66176
FMO4	1.16673	6.3353	11.1812	7.49423e-21	2.05381e-19	36.7228	UP	7.00019	7.67053	7.2516	7.65821	7.47424	7.38441	7.56157	7.66673	7.21644	7.67182	7.6006	7.10661	7.42374	7.0395	7.42504	7.19428	6.90804	6.8986	7.31069	7.22745	6.95448	5.83993	6.43485	6.44168	5.92601	5.61844	6.89233	5.89562	5.28337	6.58451	6.21859	5.81172	5.91046	7.05356	5.87653	5.76483	5.79307	5.83368	5.83929	5.60505	6.27791	5.74233
FMO5	1.72301	5.93711	7.36402	1.69874e-11	1.12135e-10	15.397	UP	7.4431	7.75325	7.21584	7.21468	6.7709	7.48569	7.16167	7.31812	7.423	7.85242	7.94908	7.22527	7.49581	7.04944	7.4239	6.9916	7.3629	7.06639	8.02241	7.11049	7.77011	5.7455	4.24471	6.71323	4.04413	5.00359	6.34216	5.26509	4.37009	6.55307	7.01405	4.08958	5.4007	9.21611	5.58383	5.45129	4.38426	5.76984	4.66118	6.42594	4.09802	6.1572
FN1	-2.55411	8.55454	-10.7485	9.19638e-20	2.11638e-18	34.2342	DOWN	5.95386	6.28251	6.20378	6.54459	6.50944	7.02942	6.71984	6.42559	6.85339	6.08876	6.62754	7.11488	6.05287	6.73611	6.48992	6.71145	6.07501	6.71088	4.98796	6.5228	5.90155	9.25408	10.0589	8.27537	9.58531	9.13032	8.63758	10.1711	9.23412	8.18821	7.0588	9.58733	10.46	10.4882	9.67017	10.3362	9.36812	9.58004	9.50504	7.80555	10.7358	10.4292
FNBP1L	1.60788	7.82168	10.612	2.02617e-19	4.45736e-18	33.4503	UP	9.03945	9.04225	9.12543	9.1151	9.13818	9.10319	9.0602	9.20359	9.14738	9.1171	9.39957	9.18328	9.29958	9.31431	9.36583	9.36262	9.01921	9.16431	9.19943	9.24049	9.00841	8.07113	6.08474	7.40554	7.5734	6.93704	7.52667	7.42963	6.74215	8.16919	8.25209	7.17793	7.18737	8.5017	7.25289	7.63255	5.29377	8.16093	6.8408	7.54685	6.78036	7.48555
FNDC1	-2.86901	5.66402	-6.89633	1.97763e-10	1.1236e-09	12.9815	DOWN	2.42386	2.9615	2.96532	2.76053	2.28291	4.48396	3.13213	3.11898	3.23589	3.66882	5.16986	3.86218	2.48439	3.19091	4.34344	3.78803	2.52143	3.24626	2.50825	3.69278	2.43879	7.61625	8.1755	7.59108	6.45006	7.42901	6.30236	7.20881	8.19216	5.32639	2.87259	6.56005	9.14038	7.39847	8.01504	8.38813	7.88742	7.06597	5.96482	4.80526	6.71622	6.47624
FNIP2	1.33368	7.6205	15.132	1.15409e-30	1.60236e-28	59.1675	UP	8.51811	8.33624	8.73591	9.0171	8.88236	8.75186	8.94707	8.79008	8.96933	8.94838	9.17903	8.83708	8.42737	8.98313	9.00766	8.80702	8.78973	8.5461	8.06259	9.11288	7.93313	7.42431	7.05088	7.22001	7.25584	7.00956	7.44147	7.91025	6.44431	7.4629	7.71177	7.06291	7.7414	7.5768	7.20219	7.25815	5.5151	7.50422	6.96725	7.0121	7.42437	7.38414
FOS	-1.79204	9.40873	-8.25713	1.33182e-13	1.1963e-12	20.1811	DOWN	8.11928	7.93602	7.41706	6.94371	7.39121	8.41908	8.23412	7.52685	7.51364	7.43628	8.4729	8.56273	8.11179	7.77373	8.70142	7.88009	8.49632	7.2576	8.27961	7.67052	7.79351	10.5411	10.001	8.30752	9.41037	9.64478	11.0903	8.82622	10.4411	9.10938	8.70103	10.1848	9.7112	11.0118	9.52674	9.81223	9.13276	10.4558	8.94592	9.50737	11.8926	9.56756
FOSB	-2.74863	7.05686	-9.22516	5.83012e-16	7.51713e-15	25.5542	DOWN	5.02058	4.79531	4.62862	4.43418	4.58083	4.58877	4.8417	4.23628	4.95639	5.09314	4.60024	4.84152	4.81486	4.44062	5.01605	4.49379	4.90463	4.74475	4.91989	4.7929	4.91078	7.68301	8.4835	6.06394	7.77796	7.72817	8.33027	6.62115	8.49611	6.15583	7.19088	8.16765	8.88674	9.11026	6.40122	7.31949	9.90896	9.14311	7.33877	6.88206	11.083	8.34392
FOSL1	-1.16854	5.81001	-6.87088	2.25587e-10	1.26862e-09	12.8521	DOWN	4.78164	4.68387	4.9454	4.73409	4.79511	5.11907	5.06743	4.55526	4.55087	4.35083	4.58584	4.41341	4.74475	5.02352	5.02207	4.73602	5.2571	4.84527	5.25886	4.60242	5.30211	5.15359	5.87506	6.57953	7.9818	6.04496	5.74923	5.53501	5.84784	6.17155	5.44957	5.61721	5.64289	7.2067	5.88354	5.81858	6.78994	6.70861	5.16208	6.65348	7.32716	6.12495
FOXA1	1.00382	5.01811	4.15915	5.70488e-05	0.000137096	0.755379	UP	5.77739	5.82416	5.95607	6.33623	6.25442	5.81913	5.74858	5.48623	6.15608	5.67495	6.05348	5.46437	5.5981	5.39045	5.93225	5.95293	5.8271	5.76529	6.05282	5.79311	6.24376	3.65376	4.05764	5.36927	5.11619	5.21946	5.61052	4.57715	3.58883	6.44706	6.43222	4.92352	2.58793	5.74295	5.58838	6.16031	3.90339	5.03556	3.8491	4.2081	2.53097	5.1544
FOXA2	1.07315	5.67352	6.25205	5.16421e-09	2.36703e-08	9.78041	UP	6.16563	6.36678	6.48982	6.89373	6.67096	6.89272	6.51925	6.79321	6.72916	6.58334	6.79439	6.6664	6.51428	6.73642	6.91009	6.72812	6.521	6.55205	5.97306	6.89481	5.69963	6.18214	3.86624	5.65519	4.09529	4.92886	6.3517	5.64996	5.92806	6.31437	5.97351	3.89073	6.13009	5.83955	5.50828	5.0815	5.06359	5.42996	6.15286	6.25753	3.81585	5.48522
FOXA3	1.24482	7.86246	4.13593	6.24006e-05	0.000148798	0.669864	UP	8.3981	8.86298	9.00719	8.99047	8.40688	9.17373	9.1763	9.35326	8.62911	9.15657	9.37044	9.49684	8.92706	9.36838	9.3167	8.58127	8.87111	8.82096	8.35431	9.09378	7.73861	7.63251	6.06465	8.06183	5.11522	7.42881	8.99453	6.72661	9.46417	8.80191	9.93239	6.88965	9.16536	7.60993	8.22124	8.87673	8.30929	8.8868	8.22587	7.22375	4.11498	7.73227
FOXC1	-1.13804	5.88183	-7.05622	8.60897e-11	5.15088e-10	13.7994	DOWN	5.32279	5.09851	4.65852	5.31426	5.18445	5.00715	5.08545	4.78079	4.48489	4.53627	4.77169	4.88999	4.73928	4.79728	4.79377	4.89545	4.84528	4.80957	5.35469	4.57707	5.47455	5.45178	5.84545	5.26762	6.11902	6.85878	5.221	6.68199	7.42346	5.64779	6.16372	6.13494	6.38487	6.31218	7.36242	6.21757	6.93584	6.6877	5.81855	6.46849	6.74255	5.50679
FOXQ1	1.39133	10.8483	3.82307	0.000201971	0.000443478	-0.445935	UP	11.6454	11.8428	12.184	12.1565	11.7639	12.4817	12.0287	12.2016	11.8251	12.1354	12.3645	12.4201	11.823	12.4221	12.3686	12.105	12.0482	12.0942	10.9711	12.3513	11.1513	7.06929	9.61386	9.86267	11.7995	10.9183	12.1306	10.4284	10.2689	12.1975	12.1124	8.78309	6.38604	10.4647	11.1059	11.5196	10.0449	10.9722	8.88946	10.8351	4.43118	11.4323
FPR1	-1.34918	5.41384	-10.7071	1.16846e-19	2.65405e-18	33.9965	DOWN	4.33689	4.32134	5.1447	3.72985	4.04632	4.30488	4.11285	4.41477	4.16354	3.72608	3.8245	4.12074	4.1472	4.47672	4.18911	4.2552	4.32835	4.96604	4.61122	4.35684	4.28812	5.08815	6.26092	5.69106	5.85548	5.81164	6.17836	5.30924	6.44962	5.64965	5.20389	5.90877	6.48413	5.32298	5.54036	6.04648	5.67843	5.31207	5.74895	4.62964	6.20003	5.46607
FPR3	-1.62589	6.70516	-10.8482	5.16107e-20	1.23237e-18	34.8075	DOWN	5.36823	5.47739	5.93563	4.82217	4.86926	5.3756	5.04165	5.33498	4.90865	5.5352	4.84377	5.72588	5.30255	5.08977	5.28369	5.0706	5.04719	6.13157	5.58198	5.62103	5.72969	6.74235	7.43441	6.71812	7.92455	7.25478	7.08128	6.7556	7.60153	6.56876	6.52966	6.6526	7.63797	6.6943	6.57029	7.24333	5.4762	6.63518	8.30181	6.62138	7.29034	6.39004
FRAT1	1.14844	6.58001	11.3438	2.91956e-21	8.50118e-20	37.6587	UP	7.43318	7.61604	7.46108	7.39737	7.07436	7.54288	7.41944	7.80775	7.49091	8.21993	7.92772	7.9216	7.52507	7.28412	7.97308	7.07706	7.28168	7.48259	7.35158	7.79596	7.37726	6.41654	5.86876	6.43946	6.34045	6.2045	6.73924	6.30218	7.27301	6.55804	6.86357	6.27306	6.32419	6.90679	6.78628	5.4743	7.39277	6.48958	6.97136	7.31639	5.8495	5.49996
FRAT2	1.08602	7.98761	8.95383	2.71043e-15	3.16041e-14	24.0328	UP	9.05268	8.98236	8.72247	8.43762	8.1257	8.82074	8.94944	8.83989	8.78851	9.1532	9.35586	9.01834	9.09478	8.78415	9.35543	8.73624	8.58972	8.96958	9.00609	8.79325	9.34182	7.8151	6.78747	8.16609	7.09406	7.67308	7.85877	7.65048	8.56304	8.17639	8.48957	7.0713	7.51707	7.21841	7.81001	7.1388	8.36514	8.07404	8.01286	9.033	6.78657	6.42279
FRG1KP	1.18521	6.54911	8.05852	3.97715e-13	3.34925e-12	19.1004	UP	6.46026	7.94025	6.36413	7.36628	8.07101	5.73989	7.36567	7.60972	8.76006	7.12616	7.72723	7.30267	8.10712	7.48236	7.0245	8.66203	7.40186	8.42472	6.6738	8.66582	8.18547	6.69651	6.34855	5.96622	6.56764	5.99944	6.57918	5.18486	5.81188	6.08886	6.43018	6.671	5.89122	6.59295	6.49452	5.53436	4.52048	5.84229	5.58642	5.42412	6.40967	6.71331
FRK	2.2645	5.69135	11.4684	1.41749e-21	4.32571e-20	38.3762	UP	7.44535	7.83517	7.41749	7.3703	7.37332	7.35615	7.63825	7.94224	7.12285	8.02974	7.94226	7.85455	7.63427	7.49463	7.79335	6.83021	7.60637	7.34178	7.99896	7.6759	7.80429	4.10045	4.35371	5.45765	4.94532	4.79451	5.72374	5.03744	3.92843	6.43027	6.60519	3.86072	4.72561	5.48587	5.53794	5.41914	3.64958	5.77717	4.43516	5.59986	3.44087	5.54974
FRMD3	1.19775	5.77546	8.54419	2.70312e-14	2.69605e-13	21.7574	UP	7.47434	7.13436	6.9619	6.34973	6.59887	6.71068	6.40272	7.19181	5.72494	6.76792	6.53927	7.69445	7.00886	6.16458	6.06468	6.56756	6.25855	6.81679	8.30254	6.56015	7.14116	5.15784	5.74828	4.62676	5.38586	5.3866	5.87967	5.81631	5.02125	5.30977	5.76795	5.4953	7.31373	4.54143	5.4001	4.74673	5.43315	6.05647	6.16139	6.60174	6.1039	4.95837
FSCN1	-1.48557	5.83135	-8.44644	4.66062e-14	4.47595e-13	21.2188	DOWN	4.41018	4.30471	4.7924	4.91871	4.32696	4.62631	4.6568	4.4416	4.68502	4.45981	4.40894	4.72664	4.88181	4.54923	4.30136	4.44596	4.95663	5.14242	4.31876	4.59502	4.27525	5.54602	6.46218	6.65294	8.10964	6.0248	5.85242	6.49758	8.20097	5.53924	5.06903	6.38283	6.66641	5.9397	6.36478	7.0306	7.41132	5.99838	7.14994	6.22852	6.75378	5.74993
FSTL1	-1.53973	7.68739	-9.45319	1.5915e-16	2.25445e-15	26.8403	DOWN	6.38755	6.22806	6.66981	6.42425	6.1464	6.43264	6.35752	6.30938	6.31471	6.44526	6.39832	6.16824	6.50866	6.50314	6.36052	6.74429	6.70229	6.76234	5.86191	6.58337	5.93619	8.17594	8.54949	7.6289	7.49634	8.46415	7.99359	8.46767	7.82157	7.46088	6.98344	8.33044	8.47306	7.4387	8.33918	8.68109	7.68315	8.49099	8.09039	6.67513	9.07235	7.85077
FSTL3	-1.37575	6.48173	-9.56416	8.44346e-17	1.23962e-15	27.4683	DOWN	5.44769	4.98637	5.58821	5.02059	5.3605	5.08194	5.4112	5.30997	5.49708	5.43695	4.90284	5.17778	5.47539	5.2772	4.9758	5.36714	5.50004	5.56233	5.67461	5.42284	5.34527	7.02274	7.22591	6.4317	7.28129	7.56679	6.45667	6.97004	7.61798	6.37342	5.97923	7.41235	7.55774	7.18711	7.17687	7.3428	8.62988	6.73672	6.98491	6.25215	7.41745	6.07647
FUT4	1.18842	7.17364	7.26578	2.86016e-11	1.82703e-10	14.8839	UP	8.33521	8.41082	7.9866	7.66748	7.57859	8.25147	8.50269	8.223	7.75478	8.3394	8.27369	8.19724	8.06198	8.2728	8.4778	7.89502	8.35503	7.9305	8.77991	7.98104	8.3577	6.16389	6.57093	7.27036	7.14401	6.90169	6.97718	6.69504	6.46614	7.46663	7.36022	5.9881	6.70357	8.05825	6.39777	6.36858	5.65194	7.4958	6.82239	7.95969	5.56866	6.60606
FUT9	2.07769	3.91405	9.19837	6.78814e-16	8.66707e-15	25.4035	UP	5.01042	5.67286	5.18741	5.54024	6.79727	6.58053	5.81857	5.69954	6.68182	6.07922	6.56379	6.4343	5.14399	5.70676	5.16773	5.99378	5.33297	5.93925	3.81676	6.06718	3.65061	2.5615	2.83381	2.62488	2.69486	2.86638	5.04408	3.91565	2.61891	4.70502	5.84443	3.95136	2.33614	2.99087	3.37021	2.47075	3.0457	4.42358	2.52262	3.47054	2.58801	4.59386
FXYD1	-1.39649	6.67266	-5.75364	5.76588e-08	2.23235e-07	7.4221	DOWN	5.17501	5.64942	5.35302	5.73209	5.73248	5.46691	5.22301	5.71334	5.27409	5.51509	5.19987	5.09792	5.50148	5.88237	5.90217	5.57225	5.56837	5.30256	5.39185	5.53397	5.67778	7.31571	7.41042	6.23998	5.87479	7.83775	6.75431	7.31283	8.50965	5.31359	6.95627	8.90716	7.50867	5.91738	6.6226	6.75972	9.7541	8.35264	8.37965	5.78111	8.25869	6.32037
FXYD3	1.99635	9.49562	7.22907	3.47243e-11	2.18748e-10	14.6929	UP	10.8756	11.2357	11.2838	11.152	10.8829	11.1955	11.2485	11.3573	11.0463	11.4169	11.358	11.3527	11.2648	10.9138	11.3346	10.9386	11.0535	10.761	11.4098	11.3057	11.2748	8.93896	7.08574	9.6701	11.0295	9.22567	9.70961	7.72044	9.06471	9.95776	10.8627	8.05862	9.60059	8.63611	10.1158	9.32564	8.08387	9.7872	8.27582	10.6526	5.46023	8.52214
FXYD5	-1.25264	8.77306	-9.29878	3.83627e-16	5.12603e-15	25.9687	DOWN	7.70747	8.05282	8.05681	7.07256	7.24764	7.90287	7.93147	7.90585	7.87822	7.80301	7.73418	7.57543	7.64963	7.99644	7.89412	7.98328	7.64779	8.18914	7.29934	7.38375	7.20196	9.28794	8.76003	8.87611	10.4474	9.33012	8.66618	8.9379	9.62261	8.51558	8.42527	9.03418	9.09813	8.26274	8.71335	9.16658	10.2191	8.61076	9.07311	9.4848	8.63227	9.38508
FZD2	-1.02379	5.8465	-9.49445	1.25756e-16	1.81451e-15	27.0736	DOWN	4.89438	5.15227	5.4357	4.89471	4.99845	5.02645	4.78802	4.83	4.83611	4.84249	4.89254	5.10685	4.91283	4.87561	5.1292	5.06534	4.66193	5.56699	4.83067	4.75611	5.20064	5.99578	6.14034	5.70247	6.42199	6.54454	5.76673	5.79803	6.3475	5.74333	5.06914	6.28792	6.0094	5.62521	6.00923	6.2214	7.26671	5.81186	6.26616	6.49261	6.14809	5.70357
FZD5	1.39189	7.22039	10.3754	7.95481e-19	1.59591e-17	32.0934	UP	8.42912	8.47219	8.28247	8.37565	8.06028	8.3361	8.3566	8.64571	8.26926	8.68609	8.71884	8.56825	8.39715	8.42116	8.93459	8.06583	8.02197	8.18689	8.34364	8.36031	8.27558	6.46291	6.80488	7.23051	6.74443	5.9716	6.85086	7.5566	6.23772	7.39605	7.35474	6.49805	6.02455	7.76396	7.15092	7.2929	6.16644	7.63111	7.22115	7.75537	6.65911	5.99105
G0S2	-1.73932	7.42746	-6.22754	5.82873e-09	2.64272e-08	9.66189	DOWN	4.23029	6.21141	6.18124	7.034	9.36821	5.45468	4.62591	7.46059	6.89	6.26096	5.4848	5.88884	5.54626	5.68315	4.6855	6.84373	5.57424	6.13362	4.52908	6.37413	4.80124	7.16728	7.83106	6.82073	8.01204	7.6652	8.10347	6.524	8.4763	7.27736	6.27735	8.27593	7.98797	8.53604	8.26479	9.39471	6.86363	6.7543	7.80993	7.03347	10.7168	8.37166
G6PC3	-1.21159	7.95754	-16.5533	4.68738e-34	1.12955e-31	66.9227	DOWN	7.07387	7.00346	6.91484	6.90034	7.00875	6.98532	6.78433	6.91212	6.98828	6.89513	6.84816	6.9367	6.82037	6.82765	6.90781	6.90442	7.00089	7.15897	6.93625	6.89765	7.00749	7.55117	8.25928	8.28119	8.23484	8.30413	8.06869	8.55138	8.86727	8.6832	8.16308	8.03601	8.20531	8.2313	8.54415	8.5422	9.01493	8.18407	8.58139	8.58945	8.14404	9.32814
G6PD	-1.01913	6.72943	-8.9363	2.9923e-15	3.4583e-14	23.9349	DOWN	6.27766	5.95586	6.33949	5.1351	5.292	5.47143	6.43808	6.15666	5.80686	6.12556	5.97109	5.64173	5.81446	5.45373	6.22975	5.43705	5.78077	6.44583	6.11982	5.7872	5.64115	6.39577	6.81007	7.4178	7.65288	7.09897	6.96203	6.72165	7.4631	7.4071	6.81842	6.50409	6.93042	7.08108	6.74422	7.17231	7.67522	7.60796	7.29906	7.50591	6.90692	6.68307
GABPB2	1.09897	6.68257	9.28857	4.0658e-16	5.39832e-15	25.9112	UP	7.39659	7.47751	7.40167	8.01812	7.83735	7.59775	7.53976	7.74685	7.73058	7.74787	7.73587	7.77073	7.61892	7.8296	7.82397	7.67139	7.45986	7.57152	6.75985	7.86735	7.13759	6.98823	5.99974	5.76167	6.46243	7.07841	6.34039	6.41676	5.78583	6.48654	6.69578	6.96435	6.71378	7.47929	7.60839	6.46502	5.75697	6.74246	5.87974	5.9378	6.55211	5.67568
GAL3ST1	1.40896	5.60683	10.5769	2.48186e-19	5.39029e-18	33.249	UP	6.75907	7.14541	6.32256	6.52795	6.71609	6.63516	6.86344	6.57369	6.76494	6.91103	6.85658	6.6991	6.87406	6.77935	6.84803	6.60718	6.63353	6.44976	7.22806	6.79153	7.63781	4.3759	4.97148	6.03117	5.66213	5.00045	5.81067	5.40012	5.09599	5.77597	5.85369	4.89839	4.45952	6.07298	6.14498	6.04855	6.31393	5.94549	4.72716	7.16736	4.76419	4.70151
GALE	1.07317	7.5268	8.52791	2.96016e-14	2.92046e-13	21.6676	UP	8.43061	8.6714	8.37036	8.21805	8.2184	8.42366	8.54668	8.47048	8.21797	8.59387	8.51531	8.67959	8.2531	8.68478	8.76734	8.41103	8.35132	8.18657	8.58736	8.30579	8.11026	7.1528	7.16047	7.89118	7.63753	6.95971	8.07997	7.03638	7.28027	8.20994	8.40447	6.48717	6.72547	7.30585	8.14383	6.83448	7.0556	7.43229	7.11023	8.09094	6.18596	7.43087
GALNT12	1.47054	8.0288	7.86169	1.1663e-12	9.2096e-12	18.0382	UP	9.01715	9.21138	9.06089	9.31513	9.24524	9.32486	9.5072	9.51749	9.3737	9.54354	9.60464	9.63965	9.22617	9.15673	9.64372	9.33514	9.36093	8.80563	8.58527	9.54935	8.54945	7.9295	6.97355	8.08376	9.39244	7.7414	8.87168	8.75538	7.7036	8.91763	8.91952	7.39682	8.46665	8.15936	7.89297	8.58722	7.04214	8.03463	8.38071	7.85846	7.28075	7.72454
GALNT5	1.99746	5.75086	11.2302	5.63908e-21	1.57461e-19	37.0052	UP	7.22602	7.38276	7.35771	7.62178	7.44388	7.58957	7.75658	7.66024	7.34003	7.90321	7.66738	7.74456	7.21923	7.28364	7.76487	6.85159	7.55163	7.03043	7.22629	7.12601	7.29393	5.65056	4.75092	6.89825	6.80893	4.31822	5.94167	5.13599	5.12074	5.98548	6.09688	4.36205	5.97316	4.71756	4.58445	4.72059	4.68837	5.10875	4.80778	4.65166	4.38344	4.63364
GALNT6	2.87571	7.7262	11.6512	4.91171e-22	1.64233e-20	39.4286	UP	9.64291	9.79821	10.4398	10.3318	9.91596	10.2513	10.2051	10.5664	10.2391	10.4336	10.3145	10.1569	10.2562	10.422	10.8089	9.86782	10.202	10.1702	9.35332	10.3288	9.32807	6.84954	5.2957	7.51479	5.41614	6.45382	9.0938	7.25483	7.19027	9.09055	9.45692	5.45643	7.42106	6.64304	8.15422	7.97705	7.06296	7.45543	7.86439	7.56972	5.13014	6.91815
GALNT7	1.80555	9.1177	8.23901	1.47209e-13	1.31274e-12	20.0821	UP	10.5504	10.9306	10.4847	10.5038	10.3488	10.7387	10.7803	10.6865	10.687	10.7685	10.7943	10.7412	10.3191	10.6752	10.6894	10.5077	10.7587	10.3298	10.7791	10.5396	10.7427	8.81575	7.47297	9.79177	6.60501	7.98677	9.5149	8.80898	8.95116	9.84459	10.7017	7.59897	8.55301	8.01038	9.86181	9.11233	6.29119	9.09519	7.98637	8.17372	7.19887	9.74027
GAN	1.1226	4.73506	15.0636	1.68956e-30	2.28526e-28	58.7888	UP	5.24694	5.46451	5.66225	5.47558	5.12327	5.77876	5.71173	6.07581	5.63002	6.18754	5.8084	5.57018	5.45084	5.44608	6.16027	5.62029	5.71424	5.06124	6.16415	5.74536	6.16294	4.52331	4.11862	4.53904	4.64712	4.61775	4.50038	4.31802	4.37754	4.74764	4.88176	4.33881	4.2517	4.84579	4.93232	4.38531	4.33037	4.63985	4.3259	4.85805	4.60505	4.24243
GAREM1	1.98244	6.50236	12.5336	2.98067e-24	1.46278e-22	44.4988	UP	7.82209	7.3743	8.32624	8.48667	7.37834	8.51813	8.26121	8.71289	8.10396	8.18923	8.58282	8.49415	8.21793	9.03286	8.39737	8.2164	8.11451	8.12932	7.54488	8.50692	7.14755	5.98556	5.21236	6.08453	5.77953	6.03919	6.00138	5.56083	5.95228	7.23628	7.66949	5.3808	5.53361	6.29611	5.95519	5.09333	4.7314	5.86708	5.82274	6.12458	5.70873	6.09274
GAS1	-1.26443	5.51164	-7.54652	6.40827e-12	4.50988e-11	16.3577	DOWN	4.27413	4.22313	4.37135	4.89763	4.87206	4.20687	4.48516	4.37811	4.58624	4.55059	4.41411	4.35279	4.48414	4.55669	4.38751	4.7505	4.08856	4.3726	4.12361	4.5712	4.46879	5.98564	6.48326	5.51589	5.63867	6.19322	5.62555	6.03603	5.99198	5.17765	4.87502	6.80584	6.40369	5.52334	5.7477	6.35685	6.96349	6.32797	6.70305	4.78259	7.01339	5.15856
GAS2	1.95113	4.79212	10.1073	3.7361e-18	6.85879e-17	30.5592	UP	6.09826	6.4013	6.04859	6.5485	7.42339	6.73518	6.69134	6.93014	6.60574	6.66458	6.74251	6.53806	6.83082	6.28109	6.46115	6.65655	5.94097	6.21914	5.72776	5.48641	6.05815	3.81723	3.5841	3.87161	3.68829	3.8169	3.94526	4.77364	3.73667	3.92232	4.89754	4.14493	4.40283	6.00615	3.80593	4.17817	3.62365	4.38373	4.41047	3.17785	3.9111	4.02936
GAS7	-1.5241	6.18902	-11.2766	4.30916e-21	1.22414e-19	37.2722	DOWN	4.8679	4.89302	5.16575	5.10851	4.8929	4.9986	5.01752	4.80864	5.06046	4.75956	4.78488	4.7735	4.98031	5.02041	4.7002	4.86883	4.83319	5.28046	4.83951	4.64068	4.76034	6.4123	7.05367	6.62271	5.66015	7.14297	6.37758	6.92943	7.60466	5.95522	5.76845	7.12324	6.68749	5.86372	6.25515	6.45779	7.92219	6.68804	7.11668	5.3381	7.38579	5.9302
GAST	5.45189	6.96245	12.2768	1.31306e-23	5.81993e-22	43.0258	UP	11.677	8.3532	12.4871	9.8529	10.9369	12.747	12.2722	12.4576	12.5259	12.7428	12.9269	12.4986	11.8522	12.8839	11.7774	11.5468	12.0055	13.1285	7.41276	13.6682	6.73343	5.22391	5.20319	5.51662	5.11228	5.05056	5.5067	8.83229	5.04503	5.5881	12.0022	4.91294	5.17009	4.78276	7.99301	5.09765	7.12245	6.30112	5.01126	4.89932	5.55673	5.20213
GATA5	1.84743	4.51132	8.87017	4.34458e-15	4.89963e-14	23.5658	UP	6.50349	6.40087	6.54403	6.0378	6.26238	6.28595	5.84636	6.23715	6.12132	3.98031	6.7637	5.68538	5.74166	6.45907	6.00688	5.86922	6.08481	5.94615	6.08539	6.33202	6.16764	3.31048	3.62268	5.20674	3.24744	3.2605	5.65256	4.38748	3.77303	4.92615	4.35413	3.59726	3.57546	3.35928	3.81397	3.62375	4.22011	5.54904	3.96159	3.91988	3.73201	4.20092
GATA6	1.79218	6.87773	11.4384	1.68659e-21	5.03694e-20	38.2036	UP	7.90775	8.07553	8.57801	8.90474	8.77942	8.45383	8.40778	8.64639	8.56823	8.56021	8.50208	8.64936	8.30004	8.47432	8.74581	8.5316	8.56079	8.28717	7.47397	8.50298	7.1705	6.62671	6.06537	6.13386	5.73208	6.42376	7.53442	6.65611	6.17354	7.00522	7.44443	6.20465	6.75801	6.86985	6.62473	6.80194	5.81043	6.48523	5.73948	6.71948	6.03407	7.29012
GBA3	1.16827	4.28396	2.73758	0.00704012	0.0117541	-3.7449	UP	8.2869	8.41063	3.15564	3.2317	3.23577	3.18167	6.35861	3.28481	3.23419	6.69733	3.67774	3.46049	10.244	3.23385	3.40131	4.5608	7.26182	3.31003	9.54452	3.24797	9.57406	3.258	3.77419	8.35704	3.18765	3.20955	3.10743	3.84024	3.21946	4.21921	6.59282	3.30051	3.19766	3.99569	3.24867	3.58042	3.67475	4.44166	3.16823	6.70908	3.29115	3.08785
GBP3	1.56113	9.54259	5.9355	2.42016e-08	9.96633e-08	8.26956	UP	11.5142	11.2286	10.3958	10.9537	10.5644	11.2185	10.9955	10.3841	10.779	11.2424	11.0718	11.7291	10.7687	10.5731	10.2995	10.7574	11.2025	10.1763	12.0164	8.47311	11.6185	9.51125	8.75404	10.6007	9.96322	9.52441	9.97322	9.46367	8.24008	10.5098	9.63838	9.25165	9.33407	9.53979	10.1326	9.8965	6.20625	9.32167	8.29509	8.41342	8.30038	9.92897
GC	3.08125	4.78984	7.01827	1.04958e-10	6.18449e-10	13.6044	UP	6.71513	6.34522	6.75722	7.58601	9.32842	9.11489	7.50842	7.63768	8.22701	6.81901	8.76372	8.62281	8.5431	8.17012	7.80556	7.95762	6.26634	6.21789	4.88122	7.82967	3.90163	2.99808	2.78719	2.85466	2.87131	2.98466	7.24735	3.26319	4.36223	5.61669	6.55923	4.11702	2.81384	9.21359	2.98776	2.75378	3.14747	5.40391	2.55047	3.28821	2.806	6.73143
GCA	1.16596	7.23498	8.63348	1.64113e-14	1.69573e-13	22.251	UP	7.9287	7.87497	8.28893	8.3066	8.41828	8.04002	8.22677	8.27104	8.25169	8.08395	8.19714	8.51362	7.97858	8.35618	8.58642	8.40117	8.46553	8.32041	7.98518	8.49483	7.53434	7.43559	6.69234	7.23645	7.64569	5.67126	7.79656	6.86646	6.97073	7.57609	7.46771	6.89984	7.10898	6.86737	6.90338	6.54393	4.68239	7.25928	7.03605	6.0812	7.30916	7.22812
GCG	1.38832	3.94591	2.65309	0.00895123	0.0146921	-3.96159	UP	8.01416	10.4158	2.45519	2.67753	2.71254	2.57358	7.37404	2.47397	3.24831	2.64123	3.44854	3.75612	8.58604	2.62848	4.39081	7.85265	7.0745	2.49626	9.57015	2.40674	10.5839	2.73214	2.8075	2.9208	2.86768	3.32556	3.11134	6.53473	5.23901	3.71469	7.91849	2.46926	4.03847	2.54454	3.74449	2.63357	3.14842	4.62818	2.57263	3.88488	2.58008	2.63229
GCKR	1.42467	6.00372	12.1619	2.55231e-23	1.0965e-21	42.3656	UP	6.91942	6.9228	7.08845	7.78449	6.99591	7.70358	7.28499	7.4267	6.55328	7.26407	7.30548	6.33541	7.37459	7.3616	7.33351	7.43096	7.20987	7.1392	7.28415	7.96258	6.55531	5.56059	5.39458	5.67483	5.14736	5.34494	6.51124	5.08999	5.5225	6.79692	6.12629	5.4676	5.16419	5.72214	5.60507	5.51262	5.77367	5.75499	5.36104	5.54434	5.46469	5.80723
GCNT1	2.32544	7.12336	8.80794	6.16684e-15	6.769e-14	23.2193	UP	8.85853	9.00017	8.7915	9.10966	8.9501	9.24894	9.14932	8.84361	9.55706	9.04193	9.07749	9.4904	8.9721	9.38787	9.43281	9.06464	9.26403	8.75399	8.6389	9.4537	8.56899	4.86967	6.10498	7.45262	5.03007	6.28309	7.94586	7.01862	5.58274	8.53599	8.01229	6.50884	5.8494	4.17346	6.04253	6.83466	4.95846	6.90463	5.4323	7.34304	5.15685	6.53483
GCNT3	1.11602	8.98159	2.77433	0.006331	0.0106773	-3.64875	UP	11.4121	10.7775	10.085	8.5552	8.77476	9.04784	10.2515	9.69839	8.54309	9.98414	9.01424	9.55202	10.5013	9.53614	9.6113	10.1478	10.2266	9.66037	12.0554	9.00965	11.877	8.78139	9.00196	10.6101	8.19434	8.38037	8.99756	8.83119	8.31855	9.98027	10.0297	5.50165	5.74738	10.0024	9.57154	9.62465	6.79085	9.857	6.85472	10.8804	3.83802	6.89448
GDA	1.70835	6.11316	5.97664	1.98466e-08	8.29909e-08	8.4634	UP	8.19285	8.53241	7.49564	6.86576	5.86326	7.5133	8.02354	7.29747	6.7519	7.60639	7.65917	6.86354	8.83985	6.68984	6.8608	7.36591	7.3778	7.36863	9.38873	6.90556	9.08182	4.62293	5.49413	6.61309	8.41212	5.17936	5.66468	6.33795	3.54238	6.93189	5.74924	3.75982	5.46972	7.30199	6.04918	6.95438	4.73809	5.87902	4.18767	7.56137	3.65684	4.07438
GDPD1	1.89167	4.76709	14.6564	1.64981e-29	1.89172e-27	56.525	UP	5.73848	6.02794	6.04867	6.65987	6.40885	6.43975	6.1574	6.84991	6.58215	6.84392	6.56739	6.82015	6.32197	6.30464	6.64779	6.42281	6.42892	5.73558	5.97915	6.62002	5.90861	4.03546	4.39153	4.29375	4.12275	3.84458	5.07919	4.11158	3.39742	4.95664	4.83186	3.64929	4.12219	5.53278	4.52042	4.71913	3.4962	4.51318	3.90891	5.85322	4.01236	3.99328
GDPD3	2.55665	6.86981	12.716	1.04104e-24	5.59625e-23	45.5438	UP	9.47238	8.58501	9.28009	8.7579	8.22264	8.71513	9.203	9.75606	8.6545	9.63072	9.1543	8.74801	8.93784	8.72063	9.2239	8.39583	9.05697	8.2182	9.84889	9.20181	9.63036	6.46043	5.83938	8.96637	6.90052	5.96189	7.0686	5.1168	6.04375	7.54799	8.25229	6.26258	5.87482	6.00796	6.65174	7.02637	6.11394	6.82381	6.39738	6.49799	5.5668	5.90304
GDPD5	-1.09267	6.5381	-10.0047	6.74588e-18	1.1825e-16	29.9733	DOWN	5.70358	5.66117	5.63913	5.87169	5.71748	5.55272	5.6369	5.51787	5.64757	5.4039	5.10656	5.54822	5.58804	5.78593	5.65245	5.6891	5.55845	5.73892	5.72628	5.32425	5.93422	6.63192	6.71605	6.80742	7.08406	6.88852	6.32978	7.20015	7.07465	6.46435	6.49522	6.64831	6.6548	7.57564	6.9491	6.73692	7.64682	6.63683	7.43474	6.83982	7.1349	6.31816
GEM	-2.99884	9.11455	-14.427	6.00096e-29	6.17579e-27	55.2421	DOWN	6.85282	6.43252	6.62492	6.69091	6.2881	6.62504	7.1853	6.62356	5.99759	6.37932	5.87349	7.32563	6.72261	6.68369	6.62711	6.47733	7.21582	6.30702	6.59271	6.01941	6.90373	10.0826	11.2708	8.86746	8.39016	10.3676	10.0682	9.33362	9.80047	8.29047	7.53617	10.9579	10.3616	9.665	10.096	9.475	8.35964	10.5406	10.1974	7.93883	11.63	9.80575
GFPT1	1.22569	8.39841	7.81175	1.53021e-12	1.18511e-11	17.7702	UP	9.66034	9.63695	9.23348	9.20445	9.07277	9.27756	9.64783	9.34211	9.40133	9.56703	9.41783	9.45492	9.31048	9.37994	9.54607	9.39095	9.52919	9.16583	9.74858	9.36671	9.65685	8.0615	6.85806	8.95693	8.71752	7.95146	8.61253	7.91048	7.18468	8.79497	9.31865	7.3838	8.07612	8.1068	8.64351	8.4972	5.76962	8.81788	7.73534	8.11506	7.07186	8.50425
GFPT2	-2.03134	6.23514	-9.39618	2.20306e-16	3.05268e-15	26.5181	DOWN	4.2343	3.83642	4.56606	4.5312	4.4835	5.19699	4.82688	4.55627	4.50483	4.3769	4.55409	4.11208	4.59751	4.63844	4.77188	4.07291	5.04464	4.60886	4.50867	4.52503	4.51894	7.05584	7.58436	6.14763	6.7058	7.0095	6.32244	6.91733	7.24301	5.70282	4.90698	7.43407	8.47462	7.0039	7.07368	7.58429	7.5873	6.79595	7.34571	5.16281	9.15448	6.28431
GGT5	-1.08136	6.84458	-6.68051	5.99686e-10	3.16431e-09	11.8917	DOWN	5.86239	5.93169	6.01194	6.3374	5.77414	6.03251	6.00334	5.81804	5.79847	5.88958	5.70497	6.02522	5.99026	5.77685	5.8567	5.90013	6.12002	6.03913	5.82698	5.93874	6.00183	7.35394	7.64719	7.09321	6.44884	7.80462	6.8041	7.63136	8.82953	6.65683	6.29804	8.3373	8.39221	6.38913	7.10961	7.26602	8.97673	6.96269	7.44857	5.89978	7.56612	6.45137
GGT6	2.27141	6.25077	9.73795	3.12161e-17	4.89488e-16	28.4545	UP	8.30459	8.14328	7.24903	7.43115	8.31108	8.27094	8.11044	8.18633	8.23726	8.21295	8.39635	7.54604	8.50471	8.11798	8.04375	7.83284	8.27168	8.20812	8.70961	8.4674	8.82166	5.72023	5.8132	7.23974	4.30694	5.82478	6.62221	8.49077	4.47141	7.32257	7.09528	4.4833	4.52357	5.39938	5.27571	5.50228	6.24795	6.02628	5.27837	7.95356	4.88443	5.93046
GHDC	-1.34843	6.3273	-14.566	2.74312e-29	2.97977e-27	56.0199	DOWN	5.13695	5.16716	5.27733	5.3575	5.20572	5.34959	5.14237	5.15734	4.78643	5.22274	5.51085	5.17339	4.63374	5.30006	5.37024	5.40299	5.02144	5.47905	5.34116	4.98718	5.03802	6.45142	6.47991	6.90577	6.45838	6.3808	6.85067	6.9221	7.28768	6.94162	6.80429	6.10686	6.73812	6.83083	6.62379	7.11695	7.91023	6.70554	6.85532	7.27732	6.38514	7.41059
GIF	4.65711	6.37156	6.39957	2.47978e-09	1.1894e-08	10.4991	UP	8.42429	10.8042	8.76468	13.2645	13.4623	11.1958	7.30493	12.4786	12.6176	11.4816	9.35512	11.7614	9.189	10.2389	9.73021	12.7142	10.8498	9.96291	6.84709	11.7401	3.85587	3.91997	3.16767	3.71815	3.22831	4.1652	12.67	6.55238	4.20412	11.45	11.0343	3.2435	6.72959	3.18034	3.26082	3.54929	3.53053	6.56502	3.77395	9.34566	3.57825	13.0411
GIP	1.07449	3.6502	4.26383	3.79162e-05	9.39836e-05	1.14552	UP	5.88279	3.68314	3.11568	3.34205	3.25364	3.37755	5.13864	3.23983	3.78184	5.02611	3.92725	4.32193	10.1717	2.94299	4.86879	5.85496	5.43796	3.11951	6.51328	3.03612	5.59303	2.77507	3.16767	3.00691	3.16714	3.19904	3.15824	2.85435	3.23336	3.79437	4.06028	3.21903	3.12246	3.07863	3.39568	2.99238	3.64491	3.16314	3.15469	3.7351	3.22156	3.22439
GIPC2	1.46772	6.49385	5.86377	3.41426e-08	1.37231e-07	7.93347	UP	8.36877	8.03752	7.01857	7.00627	7.41901	7.51327	7.65849	7.41478	7.32258	7.51707	7.63147	7.60649	8.70748	7.12285	7.86441	8.02285	8.01542	7.03899	8.44543	7.75518	8.80253	6.41105	5.83299	7.29478	4.00867	5.67563	5.64652	6.70675	5.26541	6.95674	7.19047	5.52834	5.08244	7.51688	6.27976	6.09244	4.01096	6.9176	4.08788	6.8567	5.32693	4.8415
GJA1	-1.427	9.66909	-7.69042	2.95277e-12	2.17745e-11	17.1218	DOWN	9.2653	8.87753	8.29888	8.12791	8.18785	8.13173	8.75965	8.11676	7.7069	8.07421	7.98269	8.16508	8.54207	9.20334	7.85397	8.56132	9.08757	8.42974	9.68844	8.15121	8.6391	9.19868	10.5308	9.70719	9.12708	10.3298	9.71796	10.1117	9.88322	10.0914	9.73706	10.6709	10.1279	9.35946	11.1278	10.0295	7.65333	10.0369	10.2173	8.21069	11.138	10.2778
GJA4	-1.19408	6.32819	-9.17437	7.77913e-16	9.83652e-15	25.2686	DOWN	5.16032	5.20534	5.39339	5.28264	5.66915	5.03396	5.20947	5.5631	5.43435	5.28159	5.19662	5.33957	5.19916	5.14663	5.405	5.41847	5.48509	5.29695	5.34156	5.36932	5.3738	6.43347	7.12385	6.30064	5.77053	6.48514	6.54516	7.43318	7.21992	5.99751	5.45827	7.10156	7.27117	6.51926	7.13085	7.41123	8.20271	6.21556	7.66531	6.24287	7.6836	5.7884
GJA5	-1.08374	4.4956	-10.2385	1.75373e-18	3.36386e-17	31.3093	DOWN	3.90201	3.57957	3.48779	3.85775	3.86865	3.41549	3.58546	3.60698	3.34665	3.40947	3.38483	3.44533	3.58744	3.27762	2.95706	3.74627	3.75222	3.80681	3.61183	3.94851	3.69207	4.13263	5.01955	4.75596	4.75601	4.48177	4.66643	5.51501	5.35207	4.71626	4.39844	4.92498	5.24127	4.54511	5.00526	5.60273	4.70924	4.37257	5.1777	4.33177	5.87523	4.2193
GJC1	-1.01988	5.09128	-6.51891	1.36161e-09	6.81616e-09	11.0869	DOWN	4.25323	4.13037	4.40293	4.5456	4.38228	4.37485	4.39793	4.14619	3.99443	3.99222	4.07119	4.24911	4.30274	4.45504	4.09306	4.26803	4.07554	4.12163	4.17173	4.31788	4.16079	5.00537	5.89783	4.71875	4.76493	5.53637	4.88537	6.40682	5.68254	4.52231	4.09068	6.06539	5.43612	6.0253	6.08933	5.92553	5.75801	5.53645	5.55967	5.19557	6.0449	5.20675
GKN1	5.96863	9.30865	6.30902	3.8941e-09	1.81705e-08	10.0569	UP	14.327	14.3597	14.4204	14.4199	14.3162	14.4153	14.3755	14.4199	14.3755	14.3443	14.4893	14.4199	14.4714	14.4503	14.423	14.3973	14.4199	14.2693	14.3225	14.4368	13.0087	3.53908	2.78648	3.35045	3.43523	3.8984	14.0231	3.43341	3.96468	14.1212	14.157	5.45925	3.72949	3.70898	11.2692	3.91472	6.22187	9.63504	3.90482	13.2032	3.69757	13.3315
GKN2	5.88274	9.14568	6.98364	1.25706e-10	7.32671e-10	13.427	UP	14.0098	14.1251	14.2248	14.1615	14.1407	14.2675	14.2042	14.2708	14.1369	14.2541	14.2753	14.2325	14.1352	14.1564	14.3001	14.1405	14.2325	13.9706	13.8066	14.1739	12.7242	4.5191	5.08299	4.43557	4.54149	3.93499	13.7111	7.05985	4.32282	13.4803	13.7789	4.49688	4.56557	4.33905	10.9567	3.7271	6.25244	8.70812	4.19322	11.6499	4.2309	12.4328
GLCE	1.66004	6.45252	13.0839	1.25478e-25	7.62503e-24	47.646	UP	7.77461	7.89508	7.81596	8.01987	7.57637	7.87782	7.52608	8.20053	7.71876	8.49826	8.28512	7.74284	7.84	7.76928	8.32435	7.57352	7.72125	7.92101	7.37716	7.85886	7.50097	6.33072	5.26841	6.93762	5.76755	6.36071	6.39786	5.84664	5.02291	7.2737	6.52432	6.28421	7.05419	6.03959	6.12944	6.03718	4.57616	6.10433	6.36535	5.90312	6.18364	5.94574
GLDN	1.8777	5.84709	16.1487	4.23034e-33	8.3669e-31	64.7382	UP	7.23624	6.47572	7.2877	8.02118	6.98609	7.91252	7.07875	8.2237	7.77782	8.16417	8.5426	7.77017	7.04418	7.21137	7.52132	7.30226	7.83759	6.92957	6.72974	8.07383	5.82069	5.45477	6.55134	5.40261	5.2047	5.48061	5.72992	5.70507	5.52541	5.07211	5.65315	5.4746	6.38099	5.33325	5.54524	5.78835	5.34457	5.59122	7.36391	6.01796	5.97824	5.60631
GLIPR1	-1.33021	7.14533	-8.17884	2.05183e-13	1.79535e-12	19.7541	DOWN	6.41082	6.02462	6.86623	5.45435	5.69822	6.1565	5.74217	5.63501	5.62681	5.62656	5.66672	6.60744	5.99347	6.1432	5.64244	6.42623	6.07466	6.68726	6.30734	5.99946	5.77217	7.80104	8.02164	6.9994	6.93555	7.44179	6.86581	7.34315	8.21238	6.63408	6.66192	8.36444	7.89894	6.48912	7.59024	7.58459	5.91004	7.47106	8.10262	5.73054	8.61549	8.37962
GLIS2	-1.33053	6.98511	-6.33085	3.49365e-09	1.64225e-08	10.1632	DOWN	5.65252	5.83979	6.04125	6.42634	6.71208	5.72538	5.31722	5.88807	5.9173	5.77624	5.8395	5.74013	6.06671	6.02852	4.92704	6.48441	5.5004	6.34563	5.23151	6.04342	5.68791	7.82258	8.03937	7.1555	7.72897	7.4819	6.84197	7.83731	8.39928	6.37342	5.76459	8.09412	8.43171	7.3735	8.27488	8.00718	8.60506	7.89201	7.12549	7.29888	7.86041	8.20433
GLOD4	1.03078	8.66147	11.1086	1.14121e-20	3.02402e-19	36.3053	UP	9.31407	9.40651	9.11598	9.83933	11.0738	9.22718	9.25671	9.59777	9.70249	9.54097	9.39736	9.50911	9.43524	9.14119	9.40916	9.80493	9.47422	9.37023	9.31485	9.69499	9.46751	8.12058	7.77758	8.51865	9.05339	8.77718	8.78304	8.5381	8.61219	8.83572	9.10771	8.23148	8.05549	8.43712	8.28675	8.13142	7.53801	8.40007	8.41036	8.59805	7.96476	9.19113
GLT8D2	-1.15321	7.55687	-5.66276	8.84885e-08	3.32764e-07	7.00446	DOWN	6.70636	6.59243	6.68208	6.3946	6.50426	6.87876	6.49922	6.17242	6.61843	6.34014	6.45595	6.5914	6.72623	6.71027	6.25192	6.96879	6.78768	6.62298	6.46138	6.62295	6.74136	7.90262	8.31514	8.09359	6.90695	7.99968	7.55286	7.54972	8.27067	7.22521	6.80001	8.88576	8.62873	7.03041	7.76831	8.1649	7.13623	8.17924	8.1614	5.84507	8.73826	9.48343
GLTP	1.0812	7.92537	16.2212	2.8491e-33	6.03347e-31	65.1307	UP	8.82774	8.86128	8.58266	8.7365	9.08571	8.72613	8.76912	9.02232	8.75651	8.88179	8.83404	8.72779	8.82501	8.78669	8.86321	8.68565	9.01776	8.66721	8.85045	9.15195	8.86617	7.78581	7.80927	8.63815	8.00051	7.81348	8.04099	8.22122	8.22335	7.91332	8.31251	7.75813	7.55704	8.01906	7.99321	7.83447	7.82051	7.87988	7.98018	7.84094	8.01436	8.5789
GLUD1	1.07902	8.3818	11.26	4.74604e-21	1.33738e-19	37.1763	UP	9.34601	9.39789	9.01609	9.27656	9.15613	9.28807	9.29314	9.24604	9.25819	9.38405	9.30323	9.1867	9.54874	9.11703	9.26981	9.21066	9.37373	9.06362	9.53798	9.29034	9.5084	8.13723	7.91661	8.82807	9.21011	8.44536	8.23424	8.28738	8.30266	8.48813	8.58833	8.26783	7.93987	8.45713	8.3236	8.04538	7.00826	8.50132	8.44982	8.33463	8.34219	8.07668
GM2A	-1.02377	6.47277	-10.3758	7.93729e-19	1.59392e-17	32.0956	DOWN	5.50122	5.68572	5.86482	5.34232	5.64157	5.56136	5.51651	5.79356	5.63419	5.69422	5.40622	5.65989	5.47923	5.59128	5.61901	5.70422	5.67128	6.01846	5.49541	5.46076	5.50789	6.73057	6.69066	6.65184	7.13267	6.65912	6.6274	6.67652	7.18978	7.15033	6.17262	6.65472	6.93845	6.71747	6.49547	6.84633	6.98975	6.57591	7.71297	8.35704	6.65168	6.50639
GMDS	1.23512	5.77813	9.75453	2.8385e-17	4.47437e-16	28.5487	UP	6.91329	6.92984	6.91766	6.4513	6.48555	6.6912	6.9626	6.89847	6.73931	6.94517	6.99511	6.85497	6.8448	6.93647	7.10114	6.6393	6.79276	6.72342	6.80442	6.73911	6.78595	5.32167	4.96798	6.07488	5.20694	5.57596	5.95958	5.60307	5.885	6.1506	6.26364	5.48112	5.39714	3.68822	5.51961	5.16983	5.23847	5.86504	6.15604	5.32304	4.52123	5.40676
GMNN	1.01875	8.22151	5.65337	9.24722e-08	3.4675e-07	6.96155	UP	8.97308	9.15495	8.93399	9.00009	9.39342	8.81719	9.08894	9.35731	8.96175	9.24385	9.36437	8.74815	9.09294	8.96377	9.49117	9.06619	9.32194	8.92384	8.36977	9.36012	9.01518	6.62919	7.82712	7.76437	8.66285	7.92867	7.88957	7.52326	8.015	7.70125	8.6812	7.47904	7.6315	8.63938	7.02583	7.43997	5.11778	8.13395	7.77312	9.12431	6.7205	7.92972
GNA11	1.09451	8.18288	10.1276	3.3236e-18	6.16085e-17	30.6752	UP	9.40213	9.40884	8.77549	8.87225	8.48353	9.06363	9.18574	8.88907	8.77891	8.8888	9.13019	8.99859	9.70732	8.91909	9.02998	8.93085	9.14354	8.72813	10.1642	8.82601	9.8422	7.51536	8.20666	8.82765	7.83991	7.99204	7.90253	8.45502	8.47134	8.04046	8.39365	7.83437	7.96624	7.62029	8.14196	7.89488	9.25689	8.34284	7.78045	8.64334	7.96967	8.49549
GNAI2	-1.65199	8.23663	-18.9558	1.48938e-39	8.92138e-37	79.4831	DOWN	6.88359	6.81171	7.13806	6.76904	6.48189	7.10643	6.95776	6.50128	6.85827	6.57585	6.82028	6.8122	6.55092	6.99125	6.63658	6.62102	7.0965	7.57712	7.27395	6.58774	6.74504	8.28048	8.94735	8.21352	8.59287	8.49525	8.4235	8.7459	9.42077	8.31425	7.76977	8.57263	8.82583	8.21427	8.48658	8.79122	9.4324	8.35428	9.16748	8.26092	9.07727	8.1549
GNB4	-1.13446	6.49217	-9.2609	4.75861e-16	6.24698e-15	25.7553	DOWN	5.2565	5.483	5.92845	5.50286	5.82006	5.68864	5.43829	5.61101	5.35854	5.33021	5.46468	5.55691	5.56155	5.59406	5.48974	5.53883	5.63533	5.86063	5.4414	5.49373	5.24767	7.1146	6.92117	6.11178	6.50921	7.03104	6.53938	6.67853	6.01749	6.28246	5.90076	7.43588	7.20078	6.39179	6.83146	6.59657	5.86121	6.89063	7.18991	6.25851	6.98791	6.91098
GNG12	1.06935	7.99247	8.31982	9.41385e-14	8.65241e-13	20.5239	UP	9.06016	9.12225	8.78656	8.55398	8.65728	8.78848	9.22814	8.55176	8.6064	8.907	8.88905	8.73004	9.20368	8.66201	9.00753	8.30974	9.09819	8.41745	9.80348	8.8681	9.47429	7.80501	7.87646	7.81293	5.69575	7.92867	7.5538	8.02687	7.1174	7.89189	8.10133	8.08043	7.64828	7.47702	7.95618	7.61906	6.44974	8.11132	7.56117	7.70855	8.17721	8.2752
GOLGA2P10	1.59833	6.49206	12.7323	9.47917e-25	5.10876e-23	45.6369	UP	7.63646	7.54368	7.94112	8.2286	8.02649	8.32717	7.70552	8.66937	7.58315	8.31271	8.16553	7.76676	7.41181	7.58814	7.89583	8.27458	8.04493	7.77593	7.11066	7.82829	6.72154	6.05259	6.17277	6.14977	6.37742	6.74308	7.32514	5.80919	6.42622	7.34405	7.0975	5.23401	6.50964	6.35879	5.79075	6.06505	6.52266	5.91919	5.80862	6.48563	5.51308	6.23714
GP2	1.04681	5.70918	3.37952	0.000954167	0.00186989	-1.90556	UP	7.5032	7.22384	7.19131	4.85403	5.57308	6.66025	6.83687	5.77256	6.81163	7.45189	6.80366	6.3413	6.50988	5.97064	7.08791	6.14328	7.18376	6.30238	6.33073	5.94237	7.88386	4.07947	4.71653	7.24349	4.0617	3.98862	5.62594	7.32744	4.91403	5.24706	9.08071	4.09884	4.05063	5.89969	5.75807	5.37627	5.0725	6.7111	7.53424	4.84983	4.20681	4.60653
GPA33	1.13974	6.74043	2.88094	0.00462619	0.00799045	-3.36341	UP	10.1362	9.5938	6.43797	6.03237	6.1196	6.34469	8.56126	6.78938	6.43823	7.63644	6.97971	6.79033	9.2764	6.07739	7.23055	7.4603	8.57403	6.31752	11.0242	6.81937	11.0361	9.07324	5.89406	10.2248	4.4505	4.68179	5.90438	7.43663	7.28519	7.62602	9.0228	4.20127	6.52299	5.98352	6.20432	4.51473	6.69952	7.11908	5.85456	7.76134	4.75776	4.39681
GPAT3	1.91632	6.26536	7.51146	7.73342e-12	5.36858e-11	16.1724	UP	9.1362	8.31107	6.18277	7.98517	8.30738	7.44258	8.51557	7.75702	7.1194	7.65208	7.49012	6.6503	8.34837	8.37084	7.73568	8.04153	7.96021	6.69949	10.0501	6.60207	9.05515	6.24597	4.72888	6.51287	4.39553	5.53266	6.81219	5.33963	5.35125	7.93746	7.74035	5.07266	4.47742	6.19731	5.75023	4.89972	4.62931	6.27971	4.95499	6.79355	5.6651	7.55176
GPC6	-1.45235	7.06051	-8.1804	2.03431e-13	1.7831e-12	19.7625	DOWN	6.04166	5.94252	6.20437	5.63485	6.16842	5.98913	5.68466	5.74675	6.0475	5.71465	5.62608	5.78205	5.61213	5.9702	5.90907	6.20637	5.73262	5.77868	5.39064	5.74334	5.69794	6.68587	7.84991	7.60577	6.84477	6.87828	6.78316	7.25818	7.38818	6.69778	7.14924	7.78356	8.17049	7.24047	7.01426	7.5984	7.02476	7.79547	7.63231	5.23223	8.38767	6.71191
GPD1L	1.93141	8.583	14.5134	3.68848e-29	3.96558e-27	55.7257	UP	9.90886	10.1005	9.88531	10.4831	10.3038	10.1902	10.413	10.2247	10.2938	10.4758	10.2971	10.3366	9.89223	10.243	10.5197	10.1292	10.37	9.81377	10.2232	10.4925	9.75343	8.57534	8.19868	8.63922	7.48063	8.05321	8.99498	7.71464	7.21994	8.77251	9.47446	8.00986	8.00192	8.11748	8.23095	7.68987	7.18451	8.41429	7.92012	8.38089	8.4264	8.99066
GPNMB	-2.42963	7.40177	-12.2396	1.62864e-23	7.1732e-22	42.8119	DOWN	5.53486	5.06995	6.25438	4.68315	4.96174	5.51512	4.96222	5.11214	4.67218	5.26392	4.93905	5.11957	5.00331	6.56572	5.41741	5.31162	4.87058	7.31682	5.55034	5.03127	5.37667	8.36301	8.04803	7.70647	7.94586	8.27495	7.47925	7.20581	7.6809	7.84322	6.67186	8.30957	8.52515	7.34282	7.73669	8.06731	6.3643	7.85594	9.02807	8.24974	8.05204	5.60207
GPR183	-1.14473	7.30931	-6.79045	3.41475e-10	1.87017e-09	12.4448	DOWN	6.60203	6.29528	7.71241	5.59268	5.97803	6.58454	6.16705	6.18177	5.60269	6.02413	5.63079	6.32877	6.28225	6.91913	5.78104	6.66992	6.72933	7.2384	6.71	6.01504	6.23533	8.31822	7.71006	6.73554	7.26293	7.35841	7.37655	6.98577	8.41381	6.63465	6.64438	8.22875	7.91575	6.87187	6.1891	6.91077	6.04292	7.989	8.14835	5.7002	8.7001	6.80597
GPR39	1.05032	4.96441	7.26833	2.82193e-11	1.80482e-10	14.8971	UP	5.75338	6.08298	5.78678	5.3941	5.5335	6.00688	5.95118	5.97699	5.72505	6.32811	6.24969	6.07887	5.89004	5.37667	6.03425	5.48043	5.75018	5.60016	5.84327	5.94485	6.01292	4.19075	4.53504	5.6091	5.82639	4.05708	5.20229	4.72334	4.94314	5.85818	5.82602	4.40137	3.61213	3.31462	4.42345	4.43712	4.77309	4.77912	3.82912	5.49475	3.72412	5.06703
GPR65	-1.06091	6.47522	-6.16561	7.90599e-09	3.52208e-08	9.36351	DOWN	5.97395	5.73654	6.60483	5.25409	5.20152	5.54266	5.12502	5.47193	5.34426	5.15284	4.65071	6.31465	5.70388	5.78815	5.13518	5.64478	5.6275	6.31493	5.32339	5.66786	5.66625	6.93306	6.72014	6.54868	6.70649	6.59487	6.68032	6.41215	7.36328	6.53267	6.14786	7.15579	6.78059	6.00869	5.88777	6.26868	3.54247	6.46343	7.65646	5.53836	6.64727	5.1253
GPR84	-1.0432	4.43888	-6.07737	1.21733e-08	5.26647e-08	8.94125	DOWN	3.6009	3.42856	4.20924	3.33779	3.38866	3.7242	3.56886	3.26118	3.71477	3.26209	2.93034	3.96184	3.29235	3.45525	3.48927	3.33941	3.36395	4.12898	3.87922	3.61812	3.83951	4.67593	5.2501	3.44863	5.75057	4.92757	4.7137	4.39653	5.10883	4.47018	3.39884	4.27273	4.83523	4.98087	4.66022	5.07007	4.80012	4.05247	6.29634	4.30229	5.69069	3.77052
GPSM3	-1.12228	7.12354	-12.6528	1.49853e-24	7.85415e-23	45.182	DOWN	6.11182	6.12961	6.41771	6.02621	6.50943	6.29137	6.29726	6.16418	6.22612	6.12581	6.10531	5.95733	6.14364	5.99109	6.05054	6.17407	6.22986	6.16036	6.40308	6.16625	6.09475	7.82796	7.47169	7.2704	7.33402	7.431	7.85826	7.25609	7.89645	7.18075	7.0042	7.4438	7.68425	6.7884	6.84964	7.7654	8.16856	6.97922	8.21446	6.83968	7.41705	7.18929
GPT	1.016	5.94347	13.738	2.97808e-27	2.28701e-25	51.3627	UP	7.04205	6.82102	6.75395	6.66817	6.10947	6.63516	6.67229	6.70503	6.271	6.83965	6.58231	6.95692	6.4784	6.65592	6.70156	6.57195	7.0843	6.97476	7.89499	6.80312	7.53255	6.4391	5.48767	6.18784	5.78951	5.76986	6.00124	5.49427	5.71719	6.09553	6.1688	5.55435	5.68944	5.82114	5.45293	5.62973	6.13504	5.9402	5.95252	5.93313	5.90682	5.6303
GPT2	1.12396	5.83945	5.54317	1.54566e-07	5.59571e-07	6.46117	UP	6.45136	6.86992	6.5821	7.35013	7.73126	6.29789	6.8049	7.31567	6.44014	6.89338	6.90273	6.99693	6.51639	6.51261	7.08596	6.90822	6.88026	6.62032	6.30274	6.38169	6.63195	4.76852	4.74672	6.34226	5.47684	4.806	7.14819	5.14781	4.73969	6.49007	6.93617	3.73743	4.67342	5.16192	5.94582	4.42229	5.02608	6.12045	5.58388	7.12541	4.65491	7.21252
GPX2	1.49646	8.50998	5.5473	1.51635e-07	5.49677e-07	6.47981	UP	9.6493	9.4534	9.80213	10.0057	9.62349	9.91765	10.0895	9.73989	10.0328	10.2244	10.0464	9.74747	9.39319	9.77564	9.99855	9.80982	9.83052	10.1531	9.16267	10.0035	8.67652	8.74406	6.46805	9.01975	9.32452	8.33583	9.30158	9.13138	7.53689	9.07278	9.19772	7.86762	7.36241	9.49477	9.5034	8.64475	7.95126	7.96549	8.03143	9.03854	4.48507	7.46633
GPX8	-1.54168	6.66298	-8.05224	4.11646e-13	3.4576e-12	19.0664	DOWN	5.40083	5.69723	5.3612	5.36688	5.19324	5.48031	5.58961	5.52421	5.13523	5.50414	5.30681	5.41817	5.74013	5.1188	5.21871	5.20137	5.20684	5.58803	5.1308	5.08759	5.42777	7.11742	7.25516	6.67564	6.81232	7.19638	6.87724	6.43459	6.9342	6.96963	6.27899	7.79825	7.9464	6.56836	7.20815	7.6207	5.53964	6.85205	7.21109	5.11295	7.96998	8.17543
GRAMD1B	1.20172	6.86048	10.6051	2.10888e-19	4.62959e-18	33.4106	UP	7.85744	7.5708	7.8166	7.88189	7.70854	7.61221	8.10791	7.76957	8.22407	7.61762	7.96042	8.04679	7.80332	8.22671	8.22126	7.93704	8.03521	7.85719	7.26827	8.36458	7.40389	6.39628	6.28816	7.05845	5.97293	6.59233	6.60079	6.76695	7.34921	7.21868	7.59509	6.54338	6.10221	6.34246	7.82037	7.03443	6.71721	6.66261	6.18473	7.28449	6.40989	7.46469
GRAMD1C	2.54942	5.86414	12.0096	6.1613e-23	2.44643e-21	41.4903	UP	7.53178	7.60651	7.82558	8.4611	8.50213	8.07781	7.60175	8.31324	8.29437	8.41926	8.22984	8.19488	8.31766	7.85834	8.2828	8.12103	7.93121	7.29232	7.57652	8.46426	7.26486	5.48889	4.5318	5.74682	6.42442	4.06349	6.31247	4.66604	4.55065	6.02228	6.59672	5.02638	5.16724	7.03484	3.90623	4.64196	3.92599	5.11291	4.21619	4.13455	3.94944	6.0603
GRAMD3	1.09041	6.41639	9.14548	9.16441e-16	1.14706e-14	25.1063	UP	7.0926	7.20559	6.95236	7.39196	7.4998	7.29149	7.09726	7.56299	7.85845	7.51435	7.53714	7.32801	7.47651	7.08303	7.40778	7.49236	7.271	6.9866	7.25332	7.54598	7.15119	6.45098	5.74055	6.03503	7.0148	5.87698	6.08348	5.95561	5.56607	6.35308	6.42245	6.7316	7.00394	6.60856	6.24237	6.43077	4.78969	6.15285	6.19304	5.2315	6.15321	6.82119
GREM1	-4.37457	9.68631	-11.9149	1.06642e-22	3.99953e-21	40.9454	DOWN	6.51133	5.3703	7.33378	6.48352	6.83789	4.39766	7.01767	5.70361	4.31243	5.66136	4.0568	6.28962	7.07162	7.93411	4.16669	8.29932	6.568	6.55995	2.89122	5.85286	6.8418	11.6494	12.4068	9.83099	10.4133	11.9993	10.9002	11.4253	10.1941	9.46628	9.60861	12.5503	11.4289	10.0379	11.533	11.0551	9.3626	11.4447	11.1621	7.21069	11.832	8.84588
GRHL2	1.33029	7.07618	7.22915	3.47104e-11	2.18726e-10	14.6933	UP	7.35781	7.64205	8.00545	8.80629	7.90727	8.67047	8.42508	8.38961	8.71556	8.36309	8.07721	8.88758	7.76024	8.70277	8.20381	8.35385	8.28473	8.42787	7.35403	8.15679	7.60007	7.45329	5.60342	6.24256	7.85509	7.08418	7.28277	6.40478	7.378	7.81491	7.78299	6.40348	6.88741	7.81382	7.63103	6.87294	6.72646	6.65787	6.09578	7.47455	5.05791	5.99243
GRINA	-1.81308	7.1784	-14.4912	4.17921e-29	4.41727e-27	55.6016	DOWN	5.02058	5.85727	6.03908	5.99779	5.1774	5.49442	5.68361	5.63096	5.42324	5.65365	5.54014	5.62919	5.45367	5.484	5.47524	5.48063	5.35205	5.89381	6.43035	5.67338	6.3386	7.43424	7.9733	7.66584	8.61526	7.5805	7.5935	7.9474	8.20636	7.70595	6.93847	7.1871	7.80714	7.95375	7.55507	7.76315	8.89899	7.55409	8.32984	8.48257	7.92237	7.83599
GSKIP	1.35002	9.57932	6.55963	1.10842e-09	5.6117e-09	11.2888	UP	11.4967	11.1426	10.7202	9.94139	9.74524	10.4668	10.8561	10.5696	9.90533	10.7802	10.6205	11.0755	10.956	10.5096	10.5983	10.4212	10.8988	10.5015	11.9641	10.247	11.589	9.57081	8.59495	10.8029	10.9232	9.49487	9.16467	9.25406	9.29189	10.4613	10.3577	8.35636	8.63792	8.72742	9.09098	8.71571	5.91609	9.69666	9.03037	9.30319	8.20723	8.4033
GSTA1	1.44431	6.85169	6.71355	5.06537e-10	2.70149e-09	12.0574	UP	8.05829	8.13934	7.94062	8.05545	8.60073	8.04902	7.91065	8.25022	8.05171	7.64536	8.14544	7.70948	8.89534	7.46943	8.31641	8.34062	8.07822	7.71394	8.07129	8.42038	7.52874	5.35335	5.19567	6.9549	4.76878	6.85388	7.74744	6.91782	6.61414	7.45951	7.76042	6.58461	5.89912	7.26869	6.40653	6.88201	5.90686	7.41409	5.6086	7.70037	4.97677	7.00856
GSTM1	-1.20599	7.19253	-8.88925	3.90155e-15	4.4238e-14	23.6723	DOWN	6.2585	6.13668	5.88045	6.7553	6.29808	6.52551	5.79011	6.44592	6.55814	5.52814	5.84059	5.69497	6.32511	6.12467	5.89037	5.92166	5.84837	7.01595	6.45791	5.81735	6.63267	6.75651	7.24435	7.34701	7.23064	7.00165	6.90079	8.05384	7.45784	7.01254	7.41143	7.93331	6.6998	8.2662	7.08323	7.55945	8.74135	7.49599	8.61768	8.18655	7.41478	7.75964
GSTM2	-1.15544	8.3717	-8.3104	9.91809e-14	9.09195e-13	20.4723	DOWN	7.36866	7.04362	7.16004	7.89239	7.59638	7.95199	7.07991	7.82376	7.80027	7.15578	6.69486	6.87346	7.34137	7.29978	7.14537	7.37053	7.1133	8.2704	7.54076	7.04058	7.83843	7.8155	8.26291	8.43366	8.31433	8.10479	8.15637	9.21565	8.64519	8.32522	8.55233	9.26765	8.06127	9.4822	8.22467	8.74103	9.82407	8.65333	9.82333	9.37415	8.58934	9.16824
GSTM4	-1.17991	6.22624	-8.26056	1.30682e-13	1.17535e-12	20.1998	DOWN	5.93324	5.43158	4.77594	4.91666	4.86142	4.80938	4.85171	5.19044	5.35203	4.90675	4.6965	4.71771	6.60724	4.72335	5.0007	5.20824	5.01946	5.59203	6.23485	4.69615	6.3894	5.65541	6.24265	7.12611	6.5161	6.49855	5.4215	7.13619	6.69398	6.56174	6.22694	6.3635	6.09338	6.7647	6.71475	6.1998	7.29214	6.7979	7.15598	7.7641	6.37979	6.88048
GSTP1	1.13466	10.547	9.64882	5.20192e-17	7.89133e-16	27.9483	UP	11.4745	11.5687	11.5442	11.1312	11.0031	11.6042	11.8754	11.7521	11.5634	11.709	11.8165	11.3097	11.3383	11.5273	11.8211	11.4025	11.6513	11.4171	11.1063	11.7256	11.1815	9.66298	9.90654	10.8452	10.4174	10.6569	9.9297	10.7423	10.7792	10.8145	11.053	9.9574	9.50501	10.5666	10.6481	10.5159	10.439	10.2447	10.7193	10.8965	9.51139	9.48618
GSTZ1	1.13337	6.57004	9.46141	1.51855e-16	2.16279e-15	26.8868	UP	7.89529	7.63553	7.24956	7.0192	7.69244	7.40379	7.4943	7.81051	7.45796	7.8236	7.69693	7.27866	7.57987	7.05467	7.66392	7.15479	7.29096	7.64877	7.68509	7.52149	7.92772	6.22023	6.102	7.188	6.35232	6.3086	6.70459	6.47116	7.02576	7.24199	7.00166	5.99506	6.28396	5.47794	6.47022	6.60658	6.67137	6.50455	6.52727	7.16854	6.34882	6.50544
GTF2I	-1.51561	6.82619	-15.3416	3.5995e-31	5.54878e-29	60.3248	DOWN	5.65286	5.68261	5.35032	5.83708	4.90764	5.3703	5.6777	5.3987	5.4294	5.62103	5.67097	6.03174	5.11369	5.71569	5.60703	5.14308	5.48388	5.80404	5.23102	5.96756	5.88927	7.08559	6.4803	7.10973	7.13403	7.05893	6.78346	7.39683	7.03112	7.02973	7.0281	7.31105	7.07177	7.07495	6.90575	6.9169	5.63754	7.47104	6.55013	7.37914	7.04271	7.67382
GUCA2B	1.10995	4.52282	6.90475	1.89328e-10	1.0786e-09	13.0244	UP	5.03504	5.46668	4.78448	5.32369	8.20856	4.68951	5.24474	5.21915	5.36407	5.54869	6.13441	4.73814	7.20443	4.97192	5.52686	4.72242	4.8627	4.23617	5.72774	5.0371	6.5334	4.00887	4.14054	6.5722	4.24033	3.88781	4.64159	4.17903	4.19727	3.50426	4.97463	4.11235	4.35931	4.659	4.1999	4.27544	5.07537	4.7137	4.61972	4.35259	4.42183	5.11198
GUCY1A3	-2.6265	7.41023	-9.9903	7.32662e-18	1.2726e-16	29.8914	DOWN	5.03405	5.01436	5.26295	5.34944	5.53412	5.34081	5.78396	4.73231	5.07239	4.72381	4.90479	5.20513	5.37172	5.61378	5.02576	5.88142	4.98106	5.91927	4.38366	5.16769	4.93064	8.21677	8.7734	7.62566	6.91647	8.01639	6.84476	8.2294	8.04999	6.65508	6.30994	9.25029	8.25988	7.07284	8.29678	8.3137	7.05251	8.67465	8.79093	5.08285	9.07229	10.6001
GUCY1B3	-2.70434	7.27369	-11.9939	6.74669e-23	2.64382e-21	41.4001	DOWN	4.66736	4.88307	5.02901	5.0013	5.45189	5.05945	5.31681	4.99161	4.81828	4.72282	4.83094	4.95789	5.07159	5.1614	4.93078	5.72209	4.7958	5.47774	4.39771	5.0773	4.62637	7.90703	9.0306	7.14009	7.19395	8.12145	7.15307	8.39169	7.90497	6.30967	6.16222	9.20812	8.30871	7.21357	8.38583	8.43934	7.28283	8.34418	8.50941	5.81372	9.24854	9.1162
GXYLT2	-2.74382	6.01149	-11.3323	3.12127e-21	9.05082e-20	37.5924	DOWN	3.59805	4.08543	3.5112	4.17496	3.95942	4.15827	3.85981	3.4051	3.78964	3.83089	3.60109	3.5903	3.53275	3.4248	3.68272	3.60425	3.22226	4.09939	3.52722	3.46378	3.66669	7.73614	7.33793	6.25669	6.28367	6.68109	6.29411	6.61688	6.69008	5.76558	4.68216	7.40381	8.02938	7.87692	6.65235	7.15569	7.01053	6.68962	6.90473	7.079	8.28616	6.47859
GYPC	-1.16792	8.03712	-7.18751	4.32327e-11	2.68555e-10	14.4772	DOWN	7.28977	6.99583	7.50303	6.98008	7.22175	7.1266	6.83807	6.88916	7.13142	6.72842	6.70376	7.08743	7.00605	7.15924	6.76564	7.20402	7.16667	7.44014	7.16824	6.75152	6.99841	8.44703	9.20733	7.87994	7.33034	8.3465	8.45659	8.56863	9.44365	7.40895	7.1588	8.95111	8.52904	6.97851	8.38605	8.30885	9.66135	8.55479	9.24334	7.17949	9.49908	9.95208
GZMK	-1.70065	7.05674	-6.83508	2.71373e-10	1.50751e-09	12.6705	DOWN	5.52093	6.2652	7.1603	5.74676	5.99036	5.52439	5.13569	6.59439	6.07488	4.17982	4.91839	7.09181	5.4684	5.71293	5.09001	6.17292	4.84566	6.65813	4.74261	4.91797	4.34801	7.87506	7.57691	6.36584	7.42743	7.50571	8.17736	7.09433	8.1141	6.70109	6.22793	7.95771	7.62389	5.29558	6.8728	6.95402	7.05452	6.76013	8.52192	5.43016	7.22348	6.56334
HACD2	1.46601	7.66737	11.7495	2.77904e-22	9.67816e-21	39.9942	UP	8.99513	8.87063	8.44513	8.31266	8.28327	8.54141	9.34609	9.16499	8.93775	8.88263	9.22746	8.8589	9.1533	8.86475	9.43404	8.9611	9.22959	8.69987	9.16741	8.63268	8.89425	7.11029	6.94687	7.94444	8.04186	7.42145	7.42323	7.16026	6.01794	7.80425	8.24437	7.18793	6.76749	8.97964	7.55279	7.95514	5.56034	7.59819	7.10436	7.56814	6.94117	6.76059
HADH	1.12589	8.51628	10.8432	5.31337e-20	1.26729e-18	34.7786	UP	9.69871	9.46548	9.05427	9.23777	9.72522	9.17274	9.29479	9.45098	9.50024	9.44703	9.39558	9.09534	9.83226	9.22703	9.41107	9.56567	9.47697	9.33223	9.75926	9.71225	9.86918	8.5068	8.17629	8.60387	7.66235	8.09519	8.94914	8.76519	8.77863	9.11282	8.97724	8.27485	8.01414	7.50932	8.16767	8.18931	7.82471	8.90024	8.10929	7.7229	8.36777	8.77254
HAND2	-1.20836	4.74345	-4.62222	8.90075e-06	2.44342e-05	2.53573	DOWN	3.65016	3.98963	3.73016	3.81743	3.72102	3.53354	3.54038	3.83033	3.71648	3.49542	3.62956	3.64441	3.83273	3.98098	3.59359	3.86504	3.61767	3.65521	3.73177	3.82578	3.87269	5.36266	6.01365	3.93984	4.47871	5.39165	4.24708	5.51223	6.06643	3.64284	3.60161	6.32708	5.76262	4.08606	5.61716	5.30167	5.83414	6.45002	6.40052	3.3179	6.79631	5.75942
HAPLN1	1.65144	3.98542	12.6051	1.97366e-24	9.99466e-23	44.9084	UP	5.81273	5.73765	5.73369	4.77634	4.65924	5.91544	5.4106	5.06773	4.82894	4.97558	5.594	5.25039	5.26893	5.26504	5.76971	5.41911	5.61766	5.22701	5.86115	5.39388	5.27185	4.4236	3.39495	3.43486	3.90275	3.13971	4.84268	3.32221	3.01294	4.43083	3.83794	3.10112	3.23091	3.35859	3.64247	3.38609	3.67225	3.30802	3.23609	3.6578	3.3975	3.7369
HAPLN4	1.14466	4.76382	9.26931	4.53645e-16	5.99286e-15	25.8027	UP	6.44638	6.75194	5.29609	5.45284	5.19828	6.0315	5.54943	5.6242	4.84272	5.5541	5.90286	5.30548	6.53405	4.91046	5.92689	5.40947	5.3171	4.73837	7.31572	4.92135	7.22471	4.29568	5.35498	5.73507	4.38508	4.19897	4.88493	4.3749	4.57528	4.16998	4.9715	4.0855	4.44759	4.53192	4.76562	4.53121	5.23034	4.40682	4.65277	5.69083	4.77279	4.28534
HAS2	-1.03057	5.17541	-6.32035	3.68097e-09	1.72412e-08	10.112	DOWN	4.20351	4.26654	4.16854	4.32047	4.32895	5.26027	4.05236	4.36769	4.20256	4.32831	4.30772	4.15939	4.26342	4.24102	4.32791	4.50304	4.45091	4.37252	3.87176	4.39099	4.09691	5.44534	4.78918	4.94189	5.77188	6.33515	5.3789	4.27536	5.34333	5.09369	4.68956	5.76245	6.15922	4.85974	5.03241	5.74762	4.61496	5.9238	5.2764	3.96349	7.97362	5.4251
HCAR3	-1.73738	5.02309	-4.89043	2.8649e-06	8.5292e-06	3.62881	DOWN	3.57353	3.26289	4.7484	3.34141	3.46003	3.40193	3.25939	3.65685	3.327	3.15931	3.56149	4.06703	3.8288	3.50395	3.53895	3.46764	3.73223	3.69463	3.45927	3.37643	3.38313	4.00946	5.33731	5.23102	7.01192	4.92603	5.37813	3.57296	5.37836	5.22698	3.74096	5.75877	5.19788	4.54948	6.63161	5.11576	4.45166	3.77556	3.9157	3.97683	7.51469	4.2227
HCG11	1.20333	4.12824	9.80883	2.07874e-17	3.33442e-16	28.8575	UP	5.30916	4.79935	5.56503	4.55873	4.62977	4.98017	4.7374	5.33599	5.35318	4.89526	4.94311	5.74888	5.33456	5.81468	5.23872	5.31928	5.18604	4.94224	4.8362	5.34405	5.07105	4.37729	3.94685	3.72656	3.17044	4.3324	3.47735	4.16351	3.18916	3.38193	3.85288	5.55478	4.95905	4.60765	4.09907	4.08812	3.35161	4.85093	4.40377	4.41659	4.04195	4.66843
HCK	-1.67833	7.03247	-9.57553	7.91218e-17	1.16816e-15	27.5327	DOWN	5.51541	5.81039	7.20285	4.87582	5.12139	5.84953	5.01215	5.65151	5.3277	5.37961	5.02503	6.00858	5.82806	5.35699	4.96373	5.36476	5.46902	7.10533	6.15593	5.41233	5.60795	7.57112	7.57333	7.15739	8.28864	7.30007	7.53472	7.03637	8.21521	7.53919	6.42684	7.35526	7.9122	7.10193	6.25428	7.44574	6.61062	6.59774	8.70862	7.56533	8.0949	6.73612
HCLS1	-1.33242	8.63717	-7.9125	8.84189e-13	7.09415e-12	18.3116	DOWN	8.27889	7.55234	8.98982	7.27052	7.06074	7.30245	7.09689	6.84511	7.49007	6.81802	6.8737	8.18617	7.90232	7.47202	6.78833	7.56511	7.44901	8.68993	7.62435	7.20513	7.39015	9.63365	9.33978	8.47457	8.88068	8.91505	9.68605	8.78634	9.65512	8.23156	8.08262	9.33373	9.50714	8.20928	8.49646	8.50457	8.79645	8.52647	9.79526	7.68557	9.10883	8.47438
HEPACAM2	2.182	5.93347	4.21311	4.62556e-05	0.000113011	0.955556	UP	8.82434	8.29275	6.02287	7.45027	6.72374	6.92804	7.78369	7.17516	7.87893	7.60137	8.20614	7.49012	8.81751	7.65211	7.21513	7.46846	8.48233	6.73402	8.41861	8.39622	9.57333	11.467	3.21602	6.24785	3.144	3.9869	3.94379	6.62345	9.39627	5.40122	7.89661	5.15752	11.3472	3.18021	5.26811	3.35718	5.39048	9.04389	6.28987	4.06628	3.2148	5.1816
HES1	1.04105	6.42321	11.0442	1.6582e-20	4.26555e-19	35.9344	UP	7.31112	7.227	7.23706	7.23721	7.05411	7.46014	7.24967	7.33824	7.09335	7.35182	7.37296	7.38065	7.25768	7.45896	7.51137	7.22441	7.25141	7.37111	7.15698	7.50125	7.22483	6.90489	5.35774	6.31452	6.07016	5.79862	6.29064	6.4118	6.48955	6.68467	6.65472	5.68536	5.64944	6.7769	6.85171	6.83755	6.19793	5.88666	5.61825	6.24149	5.91007	6.06013
HES4	-1.41199	6.23674	-9.44559	1.66209e-16	2.34336e-15	26.7973	DOWN	5.13399	4.65542	5.23593	5.17451	5.09029	4.74318	5.31597	5.09831	4.87445	4.74286	4.86495	5.43288	5.30846	5.02833	4.92854	4.81439	5.25925	5.2044	4.85114	5.15093	5.12889	6.27021	5.80376	5.56804	7.19646	6.62639	5.81719	6.87958	7.50217	5.482	6.09924	6.99591	7.36445	6.99618	6.90103	6.89664	7.63987	6.36626	6.60512	5.70692	6.93325	5.18546
HEYL	-1.20738	5.77222	-9.72576	3.34759e-17	5.22578e-16	28.3852	DOWN	4.60269	4.83379	4.88855	4.95405	4.86615	4.90062	4.82958	4.85314	4.8022	4.64727	4.52485	4.6081	4.70782	4.8528	4.78571	4.76091	4.67123	4.68658	4.89075	4.34444	4.88409	6.56093	5.96879	5.53345	5.94883	6.4552	5.96379	6.46189	6.631	5.31646	5.17395	6.48481	7.22336	6.03594	6.60655	6.74215	7.37448	5.48536	6.10604	5.8762	5.82964	5.82997
HGD	1.3406	5.41129	6.67767	6.08435e-10	3.20399e-09	11.8775	UP	7.07745	6.47861	6.04511	6.42951	7.18382	6.32346	6.94704	6.48532	6.71427	6.71458	6.44857	6.19293	6.06106	6.08703	6.82559	6.58577	6.61624	6.04612	6.6436	6.38466	7.02018	4.24493	4.11257	6.53041	3.91045	4.19885	6.03152	4.49356	5.09672	6.13676	5.90386	3.97132	5.47412	6.60356	6.08068	5.07381	5.01001	5.61225	5.17165	5.92434	4.29811	5.53417
HHEX	-1.07573	6.31519	-6.03784	1.47551e-08	6.31435e-08	8.75317	DOWN	5.4451	5.11503	5.81346	4.98318	5.567	5.3081	5.60085	5.20203	6.18372	5.26224	6.22972	5.32702	4.85131	5.91376	5.58798	5.70679	4.88474	5.45926	4.32411	5.76881	5.08834	6.57004	6.71424	6.37066	5.5001	6.45743	6.44638	6.99913	7.25613	6.08253	5.91496	7.17261	6.00818	8.07404	7.33062	8.37132	6.26972	7.18738	7.19748	5.26565	7.06232	5.11607
HHIP	1.19736	4.56011	7.96535	6.62518e-13	5.39825e-12	18.5965	UP	5.47974	5.25196	5.45657	5.69567	4.95826	5.51931	5.78481	5.35882	5.35313	5.59002	5.73832	5.40052	6.01475	5.81884	5.65387	5.37733	5.56903	5.7654	5.76065	5.90617	5.45354	4.49397	3.69866	4.97292	3.29191	5.31366	4.96635	3.69924	4.23108	5.43353	4.89598	4.69099	4.75711	3.61227	4.164	3.885	4.06607	4.19918	3.73939	3.60505	3.58081	4.6835
HIGD1A	1.371	9.37979	10.8046	6.64369e-20	1.55452e-18	34.5568	UP	10.7525	10.8535	10.4023	10.0743	10.2597	10.3607	10.7741	10.6654	10.1747	10.7417	10.5877	10.3353	10.4648	10.4082	10.6906	10.3921	10.6253	10.1429	10.9101	10.6833	10.8869	9.61226	8.49902	9.64209	9.72021	8.89291	9.38178	8.56822	8.58942	9.38407	10.1185	8.8161	8.71803	8.57334	8.4529	8.25039	6.6103	9.09728	8.98879	9.20784	8.71908	9.07624
HINT3	1.01891	5.48754	4.87679	3.03776e-06	9.01821e-06	3.57221	UP	6.12284	5.99587	6.18592	6.74878	6.81322	6.37699	6.30498	6.62931	6.188	6.55572	6.73628	6.50675	6.37159	6.11803	6.61627	6.46898	6.11804	6.38876	5.79284	6.56878	5.62347	4.25015	4.3931	4.40156	7.34589	4.61553	6.66388	6.44182	5.01042	7.01038	7.2345	4.58546	6.36872	7.29443	5.06485	4.81467	4.12355	4.96928	5.47381	5.85174	4.57791	6.9581
HIST1H1C	1.27584	7.80458	5.05327	1.41176e-06	4.41624e-06	4.31329	UP	9.04029	9.2591	8.691	8.43267	8.56282	8.27659	8.54027	9.06409	8.43363	9.40752	9.17909	8.90422	9.49432	8.16562	9.18079	8.69343	7.80249	8.20641	9.6737	9.53743	9.88073	6.19327	7.26093	5.22099	9.3139	7.30287	8.42241	6.11656	6.82416	7.46313	7.48443	7.31233	7.02813	9.00668	6.54553	7.28282	6.70513	8.36814	6.75343	9.10666	7.53239	7.16031
HIST1H2AC	1.58824	8.45138	8.24056	1.45953e-13	1.30265e-12	20.0906	UP	9.66135	9.64848	9.4705	9.80271	9.6267	9.48904	9.39868	10.125	9.70445	10.2836	10.1592	10.5515	10.319	9.44243	10.1324	9.4948	9.33324	8.69045	9.80377	10.2735	10.115	7.46487	8.06292	6.9779	9.70037	8.08429	9.11779	8.43228	7.5823	8.30893	8.37714	7.52684	7.84405	10.0477	6.85944	7.33655	6.21178	7.34016	7.54265	10.1194	7.92254	6.74158
HIST1H3E	1.13985	4.00474	13.6522	4.85668e-27	3.63644e-25	50.8768	UP	4.83651	5.19288	4.54704	4.71512	5.03332	4.85971	4.83302	5.41918	4.91279	5.10356	5.27687	5.27003	5.21612	4.89021	4.86247	4.71943	4.54817	4.25406	5.3391	5.10378	5.29479	3.73191	3.67003	3.81045	4.15948	3.8922	3.79659	3.82412	3.68548	3.84211	4.20539	4.11799	3.53423	4.62318	3.72447	3.56158	3.26425	3.74389	4.04366	3.36403	3.3793	3.37095
HMCN1	-1.25112	6.02154	-4.58271	1.0482e-05	2.83482e-05	2.37843	DOWN	5.24259	4.78837	5.30555	4.59928	5.05019	5.04392	5.06357	4.62086	4.72604	4.8119	4.62158	5.07483	4.98737	5.68195	4.70718	5.69415	4.83887	4.93824	4.65491	4.97539	4.93199	6.85498	6.51034	4.96007	4.26506	7.98178	5.48935	6.23454	6.71416	5.17868	5.31703	7.97209	7.46718	6.06966	6.41343	6.24918	5.63754	6.91418	5.9041	4.24115	6.96099	7.97711
HMGCR	1.54462	7.42861	9.26775	4.5769e-16	6.03489e-15	25.7939	UP	8.91836	9.45744	8.46397	7.54905	8.35646	8.50222	8.97391	9.35241	8.79008	9.04992	8.7188	8.52607	8.61417	8.524	8.91569	8.0967	8.61465	8.14926	9.33076	9.00126	9.37224	7.57605	5.84648	7.65844	7.58368	6.7714	7.23082	6.92481	6.89223	7.33917	7.83165	6.65511	7.30372	8.67342	7.33163	7.18607	4.48472	7.12257	6.88284	7.35519	6.46453	6.67325
HMGN2P46	3.41064	5.34399	17.7982	6.0778e-37	2.31675e-34	73.521	UP	7.50869	6.94658	8.11354	8.51973	8.7414	8.60468	7.86685	8.70667	9.04365	8.95466	8.69739	8.53022	8.14289	8.50772	8.94935	8.81459	8.23893	8.38321	7.16771	8.50167	5.51246	7.30346	4.32129	4.39552	4.33989	5.64385	6.2069	4.59705	4.57746	6.28349	5.99506	4.14924	4.96008	4.66761	4.72979	4.99437	4.35036	3.89122	4.48368	4.54201	4.35953	4.06401
HN1	1.3931	9.10894	8.45539	4.43418e-14	4.27022e-13	21.2681	UP	10.3678	10.5165	10.3339	9.97399	9.62707	10.3324	10.5705	10.3375	10.0679	10.2973	10.2008	10.314	10.2694	10.3326	10.4987	10.0709	10.4216	10.1215	10.5012	10.3343	10.3986	8.46208	8.2403	9.53421	9.17022	9.07463	9.0537	8.71215	8.8317	9.68152	9.89204	8.24988	8.0838	8.65339	9.40845	9.4082	8.11628	9.29604	8.72112	9.45283	7.32884	7.58211
HNRNPL	1.25609	8.00847	7.65934	3.49224e-12	2.55104e-11	16.9563	UP	9.13615	9.25701	8.89541	8.96018	8.90936	8.98485	9.37105	9.03968	8.86804	9.15084	9.09146	8.81788	9.15325	9.1162	9.30356	9.43044	9.47695	9.12517	8.67558	8.80212	8.79415	8.03477	8.13022	7.66178	9.73635	7.66385	7.38706	8.01398	8.85046	8.14786	8.59279	7.54714	8.79125	8.45306	8.01085	8.10182	8.42343	7.41577	7.62892	8.78686	8.21632	7.77249
HOOK1	1.74177	6.33837	7.45604	1.04026e-11	7.09467e-11	15.8802	UP	7.88338	8.02716	7.35225	7.86035	7.86152	7.63084	7.93198	7.69889	7.76668	7.6923	7.85433	7.59761	8.07767	7.83467	7.76609	7.77398	7.96478	7.68351	8.03945	7.50286	8.06359	5.92729	5.24145	6.61431	6.19316	5.05467	6.17084	6.00988	5.2247	6.43258	6.71887	4.87892	5.555	7.2671	6.19233	5.91019	3.5259	6.6078	5.1705	7.27422	3.23365	6.12473
HOOK2	1.29673	7.60899	11.0061	2.06775e-20	5.26096e-19	35.7153	UP	8.54071	9.04965	7.98659	8.69441	8.79298	8.47411	8.55315	8.78677	8.70989	8.91655	8.65499	8.39808	8.6254	8.60452	8.87313	8.81464	8.72846	8.51655	8.90603	8.92564	9.13558	7.8085	7.19242	7.57806	7.92946	7.74553	7.58284	7.35883	7.84947	7.79843	8.09272	6.94611	7.7537	8.09482	7.3194	6.92166	7.78774	7.3454	6.92712	8.05828	6.9285	7.27397
HOTS	-1.85883	5.00207	-9.71842	3.49137e-17	5.41395e-16	28.3435	DOWN	3.06277	4.23701	3.43504	3.45236	3.28184	3.26151	3.56735	3.24588	3.27345	3.2296	3.57038	3.4359	3.67101	3.45934	3.4651	3.14331	3.6166	3.43791	3.35437	3.41202	3.60537	5.46004	6.49933	4.06989	4.39945	4.80148	5.09887	5.73158	5.64189	4.60775	4.79104	5.26731	5.80701	6.04046	5.65216	6.5587	7.26208	5.05789	5.72258	6.76759	8.23172	5.95092
HOXB7	-1.33308	6.93296	-5.83447	3.92721e-08	1.56321e-07	7.79683	DOWN	7.70922	7.59496	4.59773	5.153	4.82126	6.57457	6.99977	4.81737	4.90503	4.86534	4.80383	5.04021	7.29065	4.15508	5.3052	5.57046	5.44211	4.61597	8.5065	4.5606	8.72237	6.56694	6.58317	7.24137	7.0757	8.07032	5.93627	7.55369	6.33186	7.42759	7.20726	6.83298	6.12496	7.08546	8.02735	7.82397	6.34493	6.19733	7.19496	7.69695	5.00044	6.84943
HOXC10	-1.9081	5.26608	-5.91564	2.66268e-08	1.09029e-07	8.17627	DOWN	3.58109	3.72315	3.95424	3.50179	3.91112	3.43854	3.74111	4.13596	3.68564	3.6276	3.40386	3.2587	3.8416	3.70443	3.56477	3.63791	3.63788	3.5397	3.79377	3.68488	3.52455	4.14771	4.79414	4.47414	4.15877	4.11762	3.97388	4.05185	3.96411	5.95017	4.00272	4.7936	5.87134	8.13673	6.65304	5.58557	5.171	6.7153	6.60134	8.63596	4.12617	3.62456
HOXC6	-3.26757	6.04352	-9.14411	9.23566e-16	1.15528e-14	25.0987	DOWN	3.07045	4.85182	3.6294	3.18021	3.04146	3.38734	3.93722	3.0845	3.07566	3.16949	3.29614	3.07745	3.38964	2.95275	3.15074	2.92067	3.70881	3.03833	3.11731	3.12005	3.01212	5.07407	4.29052	7.69588	8.7526	6.05013	3.83014	5.56004	6.28643	7.0683	6.19666	7.47863	8.9201	8.78766	7.41562	6.45621	7.37874	6.23691	6.83438	9.03826	3.88026	5.80599
HOXC9	-1.12382	4.32381	-6.84393	2.59269e-10	1.4441e-09	12.7154	DOWN	3.34295	3.46472	3.36306	3.86207	3.14654	3.51889	3.18139	3.43548	3.36306	3.15003	3.07012	3.209	3.19126	3.48392	3.38903	3.32956	3.67373	3.54646	3.30696	3.56381	3.36249	3.14708	3.90364	4.84145	5.71116	3.73124	3.89392	4.12039	4.18618	4.31918	4.21959	4.61122	4.8936	5.47159	4.82445	4.50208	5.06151	4.48886	4.11171	5.42356	3.91084	4.12945
HPGD	3.71976	8.22619	10.1674	2.64282e-18	4.96921e-17	30.9025	UP	10.8345	11.0255	11.1246	11.7091	11.098	11.4692	11.261	11.4648	11.2749	11.376	11.5314	11.0744	11.4327	11.5074	11.5503	11.2936	11.3706	10.8854	11.9024	11.6579	11.5939	6.02982	6.26463	9.74946	4.34429	5.89144	9.95926	6.96991	6.85349	10.0776	9.96252	6.3521	6.1105	8.65211	7.42112	5.4141	5.03981	8.43359	6.70216	8.03419	7.65403	7.96851
HRASLS2	1.5439	5.34014	10.9168	3.46859e-20	8.52507e-19	35.2019	UP	6.02491	6.2773	6.98039	7.05556	6.81634	6.94686	5.54743	7.19698	6.90927	7.19418	6.75598	7.15239	6.7409	6.56607	5.9348	6.53519	5.53278	6.84153	6.89362	7.02619	6.47808	4.68939	4.76463	5.24468	5.02135	4.91422	6.05536	4.4047	4.70183	5.0172	5.24875	4.44156	4.64074	4.4842	5.50216	4.52847	4.99473	4.97172	4.85893	5.99016	4.52126	5.29995
HS3ST3A1	-1.22025	4.10176	-7.91252	8.84123e-13	7.09415e-12	18.3116	DOWN	3.04709	2.69862	3.23505	3.2245	3.05681	2.80918	3.3673	3.03561	3.33434	3.15731	2.65014	2.77097	2.81033	2.99512	3.3042	3.53399	2.92001	3.39466	3.30839	2.78975	3.14518	4.62806	4.23701	3.83029	5.27669	3.57052	3.13106	4.78523	4.48296	4.0083	3.75692	4.75864	5.63237	4.0836	3.6826	4.86673	4.93438	4.87086	4.48904	3.25012	3.55314	5.38533
HSBP1L1	1.03752	6.66279	8.26284	1.29046e-13	1.16314e-12	20.2122	UP	7.60803	7.15846	7.08789	7.34249	7.61105	7.60395	7.4858	7.54168	7.76976	7.41504	7.96524	7.69941	7.27739	7.64873	7.73823	7.68987	7.48506	7.19081	7.23232	7.96812	7.72105	7.15691	6.07589	6.90443	7.52544	6.17768	6.47924	6.30243	6.44434	6.63587	6.68744	5.78725	5.62037	7.25689	5.82773	5.93253	6.04884	6.31705	6.2924	8.06335	5.95087	6.27758
HSD11B1	-2.08989	6.45965	-8.91683	3.33984e-15	3.82413e-14	23.8261	DOWN	4.80526	4.81976	4.71329	3.67056	4.98237	4.61443	3.93157	4.83334	4.88915	4.53688	4.51834	4.82747	4.70527	4.64298	4.51505	4.46109	4.86698	5.28744	4.38437	5.7003	5.04115	7.55221	7.44249	5.76963	7.00003	6.79358	6.47199	6.55652	6.88021	6.03535	5.37862	8.29149	8.41387	5.6798	7.52839	7.10051	5.68143	6.3433	8.57356	4.55262	7.84426	10.9772
HSD17B2	2.57553	8.32613	5.57392	1.34002e-07	4.89777e-07	6.60017	UP	11.4348	11.169	9.5533	10.0732	9.17138	10.468	10.9411	10.3913	9.6901	10.5894	10.7111	9.87271	11.5287	9.81282	10.5451	10.2363	10.6246	9.20814	12.3343	9.9301	12.045	6.532	5.30428	10.4941	7.92726	8.37249	8.00887	6.6284	7.79829	7.76677	9.91915	6.95283	3.39334	8.92888	9.6184	8.50148	7.30519	9.15021	6.06177	9.05424	3.34476	5.29777
HSD3B7	-1.01562	7.4489	-8.46659	4.16603e-14	4.02307e-13	21.3297	DOWN	6.59197	6.58063	7.126	6.46668	6.61724	6.47931	6.36569	6.88872	6.53942	6.70783	6.55815	6.74937	6.62722	6.38511	6.46856	6.5408	6.15755	7.05015	6.39386	6.67445	6.52318	7.30032	8.41873	7.90415	9.15552	7.97355	7.22944	7.58066	8.42719	7.89556	7.58278	7.81843	7.56736	7.96641	7.52338	8.34287	8.44559	7.83556	8.1157	7.79164	7.80774	7.14061
HSP90AB1	-1.0361	10.8542	-8.40442	5.8871e-14	5.5596e-13	20.9879	DOWN	10.0872	10.0965	9.82422	9.83467	10.0606	10.0706	10.1998	9.80935	10.2816	9.89084	10.1208	9.82186	9.84638	10.1094	9.97704	10.1546	10.1506	10.0378	9.42541	10.0113	9.83116	10.5185	10.8943	10.9712	11.4124	11.155	10.5155	12.5384	11.0389	10.9215	10.8652	11.1299	10.6334	11.0881	12.2328	12.3282	9.91624	11.3186	10.8807	12.2988	10.6717	11.3786
HSPB1	-1.01737	10.8485	-6.02167	1.59594e-08	6.79091e-08	8.67646	DOWN	9.67211	9.61841	9.90961	9.61963	9.56053	10.186	10.312	10.1019	9.91461	10.233	10.1223	9.61029	10.0015	10.2391	10.4993	9.86021	10.086	10.1122	9.72296	10.6451	9.8264	11.3611	12.0776	9.36736	11.3014	11.3629	9.9886	11.8102	12.2259	9.9947	10.6124	11.681	11.2802	10.5501	11.3769	11.536	12.4059	12.3623	11.6523	11.1224	12.1063	10.7661
HSPB6	-3.17021	6.57209	-8.26188	1.29731e-13	1.1683e-12	20.207	DOWN	3.73268	3.9176	4.17653	3.92241	3.75264	4.18167	3.78981	3.52283	3.97153	3.87353	3.81329	4.08266	3.80276	4.20624	3.84254	4.00994	4.08794	3.8309	3.94586	3.72174	3.84581	7.86086	8.64076	5.3312	5.8606	8.76494	7.43774	8.82432	9.85105	5.13813	5.92346	8.60215	7.60375	6.00789	7.88355	7.77026	11.477	9.19641	9.28766	4.84593	9.18986	10.3818
HSPB8	-1.32087	6.60511	-6.29853	4.10229e-09	1.90697e-08	10.0059	DOWN	4.95762	5.16126	5.14209	6.36105	6.84367	5.40156	5.13405	5.42877	6.30044	5.68471	5.31788	5.69644	5.47129	5.45036	5.08864	6.48631	5.18336	5.10054	4.65239	5.36023	5.15923	7.05006	7.85717	5.54464	6.03228	7.06206	6.85918	7.76342	8.01777	6.07144	6.29045	7.84274	6.63451	6.26333	7.01321	6.712	8.57523	7.56102	7.72016	6.25246	8.99498	7.60317
HSPG2	-1.32797	7.65613	-7.38425	1.52542e-11	1.01461e-10	15.503	DOWN	6.5793	6.36812	6.85334	6.49479	6.44922	6.43376	6.57624	6.61366	6.26237	6.436	6.53401	6.37394	6.3217	6.5933	6.60466	6.69209	6.66554	6.49307	6.65039	6.48195	6.85045	8.06905	8.16927	7.69661	7.62993	8.70462	7.38455	8.87989	9.24012	7.26843	7.32206	8.90988	8.60932	8.12417	8.70112	8.97944	10.1466	8.52769	7.8106	7.30561	8.99709	7.12941
HTRA1	-1.40058	9.1398	-7.33919	1.93835e-11	1.26913e-10	15.267	DOWN	7.85767	8.05385	8.03806	7.96365	8.071	8.23288	7.84561	7.84643	7.93096	7.61037	7.79703	7.86257	7.97896	8.12298	7.70609	7.99051	8.23763	8.33256	7.85745	7.99059	7.87602	9.02929	10.4382	10.0539	9.68015	10.2036	9.38593	10.0851	10.3119	9.01623	8.58222	10.1541	10.1447	9.04784	10.1453	10.0992	10.5742	9.95458	9.62193	10.8062	9.90388	8.88933
HYAL1	2.0241	6.79136	8.54032	2.76221e-14	2.74584e-13	21.7361	UP	8.91783	8.54673	8.83991	7.82248	7.73456	8.35545	8.58142	8.68199	8.5913	8.64265	7.92806	8.56603	8.00665	8.19387	8.74905	8.287	8.73947	8.59919	9.26982	8.31476	8.99406	7.64382	5.80424	7.56037	7.92278	5.28698	8.17107	6.02648	6.36829	7.65988	7.71907	5.23349	6.74266	4.49379	7.79445	7.13115	6.40367	7.06973	5.99748	6.99629	6.02883	6.95588
HYLS1	1.1979	6.98009	9.09811	1.19866e-15	1.47476e-14	24.8405	UP	7.77666	8.09417	7.48184	7.8577	8.13804	7.98176	8.36052	8.22478	8.13242	8.55741	7.97369	7.95136	7.95115	7.87317	8.26805	7.85085	8.17275	7.70489	7.31041	8.36766	7.70642	6.53427	6.04796	7.06799	6.64088	6.17459	6.83103	6.44262	6.47591	6.87405	6.92427	6.55101	5.99467	5.87998	6.9104	6.51341	5.30716	6.5625	6.9174	7.69723	6.2384	6.69704
ICAM1	-1.27059	6.61648	-8.38535	6.54508e-14	6.134e-13	20.8832	DOWN	5.408	5.45691	6.20828	5.57872	5.40825	5.6737	5.34791	5.31801	5.28583	5.15805	5.06955	5.87762	5.50101	5.55977	5.36968	5.52407	5.50214	6.40159	5.89048	5.45751	5.51147	6.93157	7.21541	6.58036	9.36837	6.79416	6.99797	7.28155	7.51745	6.89611	6.3268	7.21255	7.08472	7.30403	7.19113	6.95032	7.65828	6.48603	7.02208	7.06509	7.77748	6.75422
ID1	1.47109	9.94127	6.66529	6.4807e-10	3.40095e-09	11.8155	UP	11.4185	11.2571	11.3954	10.6834	10.5154	11.3979	11.4026	11.3386	10.318	11.3026	11.1223	11.3635	11.1098	11.5129	11.3219	11.2042	10.9071	11.3285	11.4971	11.1609	11.1871	7.96431	9.21436	9.04729	10.1723	8.86966	10.6824	9.73328	9.43319	10.7655	10.541	8.64624	7.67748	10.6312	10.0643	8.42899	10.333	10.6782	8.52128	10.6981	9.45713	9.36851
ID3	1.1876	8.93221	9.04435	1.62506e-15	1.95689e-14	24.5392	UP	9.95038	9.90555	10.1262	9.74179	9.72194	10.0839	10.0759	10.3023	9.91956	10.2071	10.0597	10.1944	10.1516	9.9392	10.1994	10.0661	9.38548	10.0157	9.67236	9.8377	8.99204	8.1058	8.86534	7.92551	8.62902	8.91746	9.51145	9.14051	9.27132	8.10206	8.68049	9.52553	9.14345	8.40661	9.2262	9.11383	9.86188	8.62236	8.49308	9.22999	9.77385	8.38053
IDO1	-1.08415	7.02211	-3.16578	0.00191947	0.00355366	-2.55502	DOWN	6.28888	6.69285	6.97524	5.24756	5.68838	6.26491	5.84695	5.78708	6.35178	5.84911	5.3558	9.13362	5.37216	5.50546	5.42761	5.86758	6.08888	6.59947	6.59468	5.49393	5.88735	6.64306	7.84017	6.54885	11.149	7.87424	7.21996	6.58823	6.47198	6.36514	6.2022	6.8274	7.27694	6.75707	7.35468	6.27646	5.80882	7.01408	8.27635	5.8899	6.036	7.04362
IFI27	1.72636	11.0331	8.71123	1.06158e-14	1.1309e-13	22.6819	UP	12.5202	12.5151	12.9552	12.3875	12.0657	12.7004	11.9986	12.8541	12.7104	12.7877	12.4713	13.2616	12.1362	11.9986	12.4891	12.11	12.5608	12.2704	12.7645	12.548	12.0766	9.87599	10.8538	10.3863	11.8816	10.8779	11.3399	11.0004	10.4421	11.5546	11.5629	9.68359	9.54328	8.52092	10.9445	9.9352	8.76973	11.17	10.5276	11.7232	10.1175	8.67166
IFI30	-1.10625	10.6631	-6.17295	7.62598e-09	3.4024e-08	9.3988	DOWN	10.1907	9.81214	10.6022	9.32935	9.27355	9.86999	9.13867	9.68729	9.66609	9.89655	9.01938	11.0912	9.50797	9.35509	9.30599	9.13336	9.55224	10.7768	10.2927	9.09404	9.79368	10.5251	11.6859	10.404	11.6747	11.1775	10.929	10.8915	11.3245	11.2095	10.1891	10.408	11.4753	10.591	10.757	11.0812	9.16283	10.3075	11.9701	11.63	10.6509	9.79905
IFITM1	-1.52366	10.7239	-9.58533	7.481e-17	1.1084e-15	27.5883	DOWN	9.82683	9.47689	10.0204	9.27293	9.29937	9.47614	9.31381	8.80808	9.39714	8.67421	8.54018	10.2005	9.68006	9.43059	8.89425	9.50225	9.42025	10.288	10.1393	9.18203	9.45173	11.4378	11.4148	10.6074	12.5392	11.6065	10.8109	11.5611	11.4069	10.9996	10.0898	11.2112	10.847	9.38302	10.5088	10.0341	11.5341	10.8362	11.1279	11.8835	11.397	10.0417
IFITM2	-1.57942	10.8312	-12.6376	1.63624e-24	8.50291e-23	45.0946	DOWN	9.68567	9.52499	9.98686	9.32714	9.37592	9.53313	9.35119	9.10346	9.44925	8.98794	8.76696	10.528	9.57361	9.39205	9.07895	9.51379	9.55169	10.1475	9.90223	9.41543	9.36857	11.284	11.9485	10.7279	12.404	11.7723	11.1366	11.4846	11.3938	10.7185	10.151	11.5464	11.0964	9.96685	10.9903	10.4658	11.7061	10.9291	11.2187	11.7122	11.7557	10.4442
IFITM3	-1.49949	11.8807	-14.645	1.75896e-29	2.00416e-27	56.4614	DOWN	10.8366	10.7073	10.9804	10.3559	10.4822	10.693	10.5819	10.3817	10.7459	10.2669	9.95823	11.8157	10.624	10.3542	10.3896	10.425	10.5597	11.1208	10.8007	10.5586	10.3768	12.1235	12.9132	11.9093	13.2126	12.6015	12.1748	12.659	12.3009	11.6723	11.0882	12.41	11.9655	11.8532	12.3952	12.153	12.8209	12.026	12.2668	12.6589	12.8515	11.6096
IFT172	1.01713	7.651	9.13652	9.64157e-16	1.20319e-14	25.0561	UP	8.85855	8.45879	8.35362	8.39518	8.33555	8.70999	7.68258	8.51703	8.43749	8.48533	8.40127	9.12315	8.66636	8.19531	8.48599	8.44428	8.47913	8.19065	8.94227	8.65201	8.81815	6.92588	6.90999	7.51473	8.38349	7.72063	7.58636	7.70059	7.25964	8.01443	7.61506	7.14452	7.32915	7.60027	7.85912	7.60133	7.93624	7.48917	7.05351	7.75185	6.89876	7.25342
IGF1	-1.61353	6.25356	-6.62332	8.02449e-10	4.15391e-09	11.6058	DOWN	5.09489	4.79992	5.55338	4.74275	4.65708	4.64937	4.85928	4.68705	4.79213	4.71098	4.47477	5.02789	4.87642	4.91586	4.73955	5.22717	4.7244	5.64574	4.98087	4.6144	5.05747	6.87498	7.62053	5.9802	5.4727	7.70819	6.56672	6.90622	6.04802	5.52992	5.57291	7.86503	6.67479	6.22335	6.31233	6.30428	6.52287	7.62399	7.12557	4.35541	8.2547	5.7931
IGF2BP3	-1.17747	4.28563	-4.7608	4.98024e-06	1.42813e-05	3.09508	DOWN	3.432	3.02606	3.58007	3.21071	3.12939	3.21632	3.4948	3.23168	3.13353	3.2913	3.29327	3.33179	3.2033	3.35167	3.4553	3.12021	3.8138	3.24083	3.30266	3.16128	3.18532	3.88424	4.86352	5.37473	4.87929	3.17555	3.9488	3.78637	3.23957	3.70099	3.29692	4.03907	5.75932	6.69531	3.73918	4.96228	3.4685	5.89418	4.72177	5.75561	3.49657	3.31588
IGFBP2	1.10961	9.02604	4.34999	2.69516e-05	6.83985e-05	1.47212	UP	9.25326	9.76047	9.9154	10.4867	11.4245	10.0483	9.93235	10.3483	10.6079	10.3366	9.83606	9.91645	9.53693	9.73119	10.0823	10.1627	9.84672	9.70743	9.18439	9.97174	9.052	9.58008	8.54576	7.03194	6.2078	8.93258	10.4887	9.11132	10.2999	9.53342	10.0516	9.32415	8.73467	8.31648	9.93441	9.22111	10.3457	10.0231	9.5264	8.69651	8.47409	10.4097
IGFBP4	-3.39095	9.80269	-14.0783	4.30753e-28	3.70112e-26	53.2838	DOWN	6.73768	6.80373	6.59993	7.1441	6.85135	7.059	6.89694	6.81574	6.55167	7.04362	7.06272	6.9972	6.96906	6.81093	7.47821	6.90174	7.14416	6.85675	6.86606	7.30189	7.08301	10.6289	12.0024	10.4464	9.40917	11.6358	10.7293	11.757	11.8733	9.81954	9.5195	11.8255	11.0268	10.2367	11.4008	10.8543	12.4213	11.2215	11.545	9.55825	12.1434	10.106
IGFBP6	-1.16182	7.63677	-5.44685	2.41032e-07	8.45446e-07	6.02882	DOWN	6.57249	6.4811	6.4753	6.95237	6.46961	6.93778	6.84542	6.32094	6.38421	6.71752	7.01578	6.70229	6.70204	6.98752	6.96943	6.88794	5.99366	7.00434	6.27147	6.70967	6.4547	8.25894	8.44333	8.27662	6.66652	7.96025	7.53724	7.87236	8.51188	6.82514	7.77915	9.06094	8.99274	7.42944	7.76325	8.3068	9.52077	8.57464	9.04269	7.1305	8.49173	6.86335
IGFBP7	-1.41448	7.82393	-12.22	1.82384e-23	7.966e-22	42.6994	DOWN	6.53802	6.54106	6.81766	6.66803	7.10587	6.78758	6.60672	6.47537	6.73628	6.35729	6.47312	6.62349	6.70757	6.53787	6.29502	6.95223	6.65847	6.6086	6.63902	6.66486	6.53001	8.68077	8.37123	7.93873	7.70969	8.2678	7.77055	8.42018	8.33126	7.43902	7.15345	8.56909	8.83673	8.07112	8.6028	8.65696	7.84313	8.00765	7.91111	7.28024	8.75105	8.04797
IGHV3	-1.07874	6.41137	-4.46053	1.72789e-05	4.51462e-05	1.89828	DOWN	5.71888	5.88634	6.72069	5.11465	4.64781	5.49666	5.15414	5.16527	5.57902	5.18935	5.43841	5.59652	5.91136	5.77138	4.92363	5.37177	5.3766	6.01091	6.14746	5.17058	5.19792	6.17514	6.87387	6.90628	6.55693	6.3594	7.86857	6.22892	7.03807	6.38032	6.74752	7.39202	6.36854	6.21239	5.98541	6.27537	7.82722	7.00035	7.03754	6.42282	4.62835	6.56803
IGSF8	-1.2773	6.23872	-13.5475	8.8264e-27	6.40296e-25	50.2832	DOWN	5.39636	5.53166	5.06431	5.10649	5.01462	4.70281	4.97516	5.28311	5.29058	4.85622	4.96062	5.36611	4.99648	5.11541	5.38803	5.32375	5.10873	4.96638	5.36876	4.91793	5.7237	6.34435	5.9459	6.83277	6.78729	6.43118	6.76665	6.72199	7.26937	6.73743	6.63312	6.12307	6.75452	7.11379	7.55775	6.68587	7.51379	6.61485	6.58908	7.34196	5.922	6.30613
IGSF9	2.43722	5.43897	12.0192	5.82823e-23	2.32298e-21	41.5455	UP	7.00073	7.30056	7.63122	7.37285	6.61298	7.74823	7.72551	7.8095	7.13277	7.63116	8.20199	8.02217	7.64259	7.88935	8.07834	7.54133	7.45259	7.03727	7.26241	7.35924	6.80474	4.65666	4.60401	4.70001	5.26022	4.23453	5.6931	5.20076	4.14535	6.21979	6.37824	3.89853	3.93602	6.56555	5.08249	5.6643	4.45265	5.0649	4.33864	7.25092	3.57101	4.4355
IL13RA2	-1.069	4.42646	-4.39549	2.24654e-05	5.76555e-05	1.64655	DOWN	3.51104	3.31288	3.11784	3.13349	3.71974	3.09485	3.87713	3.18518	3.90995	3.8257	2.8965	3.25893	3.3233	3.13575	3.54285	3.88565	4.33807	3.20614	3.71451	3.72983	4.35881	3.74538	3.54397	5.3943	3.91657	4.72609	3.94189	4.84225	6.80588	5.9815	5.32874	5.01505	5.08486	4.07039	5.10431	4.8421	3.62382	4.11049	4.85943	4.40871	5.8218	6.11984
IL15	1.07398	6.06786	9.51701	1.1055e-16	1.60554e-15	27.2013	UP	7.19355	6.99319	6.95624	6.55249	6.53961	6.95219	6.69	7.00221	6.87624	7.23257	6.92098	8.15517	6.91285	6.7768	6.864	6.82479	6.56319	6.84059	7.07555	7.1744	7.29403	6.04333	5.96954	5.04812	6.67517	5.81256	5.9277	5.93887	6.42278	5.55128	5.67772	6.35199	5.758	4.57814	5.59951	5.47229	5.37524	6.18013	6.61627	4.89617	6.45303	4.84993
IL18	1.36534	6.52867	6.2176	6.12168e-09	2.76716e-08	9.61388	UP	8.00287	7.99754	7.66914	6.59604	6.76727	7.37072	7.87047	7.64335	7.11574	7.95738	7.53697	7.61157	7.4875	7.73343	8.06501	7.35514	7.82069	7.61934	8.65712	7.34781	8.9877	6.52901	4.96276	5.91416	6.74928	6.1166	5.40671	5.44861	5.79275	7.08198	7.28916	5.91288	5.64567	5.26159	5.68443	5.60665	4.35678	5.16086	6.40529	6.47194	5.01135	5.06633
IL1R2	3.51399	7.88483	9.77872	2.47079e-17	3.91831e-16	28.6862	UP	9.56426	11.6999	11.3638	10.5835	10.1555	11.379	11.6977	10.9625	10.1545	11.2752	11.1938	10.8623	10.2978	11.3457	10.6397	10.713	11.2617	11.0832	10.5547	11.0368	9.81082	10.3605	5.87483	8.54659	6.13402	5.93482	7.87685	4.28944	8.39482	8.17823	10.4166	6.29328	7.32906	6.20048	5.96662	6.18927	5.15516	6.30114	6.87486	6.39313	5.47217	6.74485
IL2RA	-1.20333	5.07478	-11.5386	9.4336e-22	2.99206e-20	38.7805	DOWN	3.9755	3.8531	4.49661	4.00395	4.28587	4.01028	4.05566	4.10201	4.23133	3.8996	3.78952	3.7913	4.02926	3.98802	3.91944	4.0916	3.98498	4.26996	4.30029	4.0665	4.17577	5.24803	5.74356	4.9832	5.25234	5.43149	5.5163	4.76044	4.89458	5.44894	4.69307	5.00551	5.24949	5.05058	5.04147	4.94134	5.40244	4.83571	6.3023	4.80533	5.95099	4.85738
IL2RG	-2.58392	8.40875	-12.8938	3.74249e-25	2.10918e-23	46.5602	DOWN	6.70573	6.5445	7.23672	5.74961	5.64609	6.24625	6.10187	5.67299	6.16822	6.03565	5.72275	6.09012	6.33671	5.8656	5.68637	6.15801	6.35209	6.31431	7.57857	6.10219	6.63981	9.36452	9.74007	10.6679	8.89175	8.60273	9.36348	7.96989	8.9839	8.46052	9.85112	9.1494	8.63324	8.00167	7.81841	7.50155	8.40155	9.01272	8.95802	8.03958	7.22645	7.46913
IL32	-2.42271	8.97578	-13.5769	7.4618e-27	5.43183e-25	50.4501	DOWN	7.71142	7.55598	7.79561	5.91043	6.04659	7.06806	6.83312	6.80119	6.30617	6.83202	6.06803	7.90467	7.44104	6.0567	6.7963	6.24397	6.52754	7.36404	8.43272	6.04127	7.97148	9.01531	10.148	9.32296	11.7906	9.96613	8.91411	9.52372	9.70147	9.20306	9.13044	8.97093	9.29516	9.66037	9.10816	9.4901	9.1336	9.30631	9.55333	10.6311	8.46148	9.46043
IL6	-1.85326	6.32403	-6.82305	2.88733e-10	1.59549e-09	12.6096	DOWN	4.56318	4.87362	4.90307	5.06691	4.80129	4.42041	4.4617	5.10615	4.83072	5.22865	4.74578	5.32832	4.88261	4.71949	4.45407	4.78299	4.19078	5.02076	4.69402	4.53331	4.47006	7.35937	8.46689	5.22857	7.05697	6.45634	7.05618	5.90584	7.14963	5.38482	5.19816	8.05468	6.35164	8.34197	9.96679	6.28419	5.89765	6.0663	6.10474	5.38252	11.2409	6.41422
IL7	1.00655	5.95086	4.24777	4.03877e-05	9.95331e-05	1.08516	UP	7.219	7.02175	6.67056	6.2539	5.87882	6.93817	6.62524	6.92978	6.14931	7.07618	7.01171	7.71136	6.89737	6.6545	6.93647	6.19073	6.89903	6.53708	7.35438	6.8771	6.91027	5.42077	4.11728	4.94965	7.38388	5.73252	6.03269	5.85946	5.84927	5.88898	6.001	5.53148	5.34425	4.99635	5.13135	3.49014	2.67747	6.13898	6.16516	5.63952	6.17932	5.06878
IL7R	-1.9871	8.32415	-9.61994	6.13695e-17	9.21641e-16	27.7845	DOWN	6.32375	6.63949	8.24935	5.60065	6.77871	6.74178	6.43084	6.78514	7.058	5.69611	5.01762	6.46218	7.15643	7.94131	5.4557	7.43692	6.82332	7.80479	7.18851	6.23138	5.89474	10.4757	9.01127	7.93504	8.49525	8.79237	9.13665	7.43729	8.75664	8.73941	8.77037	9.89024	10.3328	7.42397	7.38814	8.13883	6.72996	8.3329	9.1458	7.34386	7.9958	8.0576
ILK	-1.57822	9.7013	-11.503	1.15974e-21	3.6074e-20	38.5754	DOWN	8.24073	8.37562	8.3407	8.29064	8.29517	8.43427	8.43975	8.28062	8.29773	8.4939	8.28787	8.61029	8.34775	8.37657	8.35613	8.55685	8.30961	8.2374	8.43101	8.48376	8.37097	9.92602	10.5484	9.59243	10.213	10.2266	9.68269	10.6121	11.2702	9.43353	9.43661	10.425	9.95866	9.39441	10.3863	10.1974	11.6224	10.433	10.7827	9.68856	11.1495	9.40926
IMPA2	1.36414	8.42984	8.25785	1.32654e-13	1.19258e-12	20.185	UP	8.59952	9.39435	9.13885	9.36529	9.43468	9.49286	9.45189	10.1091	9.9322	10.0385	10.3311	9.65505	9.19148	9.58349	10.074	9.66455	9.66805	9.85727	9.10042	10.2554	8.77806	8.25105	7.68114	8.64658	7.50193	8.63697	8.35929	8.24594	8.16114	8.70598	9.02526	7.44552	8.11865	9.0587	10.2144	8.90141	8.46612	8.57066	8.47709	9.04827	7.05001	7.45585
INAFM1	-1.09248	7.61031	-7.57834	5.40161e-12	3.84011e-11	16.5262	DOWN	6.22345	6.5652	6.68447	7.01108	6.95489	6.71565	6.94161	6.73175	6.63125	6.64294	6.44457	6.92113	6.61471	7.17081	6.6541	6.8085	6.4905	6.83931	6.51162	6.65034	6.31633	7.75958	8.65118	7.45257	7.87592	7.91406	7.89198	8.11916	8.85115	7.17017	7.35693	8.45381	8.39182	7.76125	8.735	8.67882	9.9258	8.09392	7.97867	7.26483	8.72521	8.71473
INHBA	-1.66934	4.61593	-12.4153	5.9008e-24	2.74302e-22	43.8204	DOWN	3.53352	3.05152	3.29956	3.09008	3.1884	3.00319	3.24059	2.9939	3.24282	3.11195	3.11647	3.1218	3.29234	3.13368	3.16815	3.20477	3.7392	3.21592	3.32957	3.19157	3.18662	5.19542	5.02023	4.64793	5.50125	5.12124	4.50694	4.69887	4.1737	4.56131	3.9794	5.39925	5.76681	5.41914	5.64839	5.45749	4.1304	4.67612	4.71319	4.12231	4.41589	4.50191
INHBB	-1.15313	6.60572	-6.51464	1.39125e-09	6.95129e-09	11.0658	DOWN	5.4052	6.07041	5.79292	5.56317	5.63053	5.84563	5.63264	5.81464	5.45238	5.88958	5.03947	5.45728	5.58101	5.08542	5.72215	5.45763	5.0373	5.53394	6.15436	6.06214	6.12902	7.32304	7.53915	6.13314	5.43274	6.90193	7.47028	6.75452	6.7337	6.59485	5.65139	7.34218	7.19029	7.3517	9.23374	7.52424	7.56831	6.91844	7.0363	7.22863	8.10328	6.13854
INS	-1.59739	5.57501	-6.17882	7.40921e-09	3.31132e-08	9.42703	DOWN	4.30573	4.35779	4.22181	4.43884	4.68485	4.0642	4.30431	3.89612	4.49154	4.05431	4.18447	3.86186	4.28851	4.47753	3.8957	4.58518	4.24444	4.24782	3.92317	4.08589	4.25256	5.92791	6.77766	5.54953	5.12135	5.57896	5.90391	5.86383	5.88218	5.10201	4.78466	5.91234	6.57955	5.80672	6.10186	6.28684	7.29793	5.67756	6.37609	4.83007	6.78526	10.2231
INSC	2.06121	4.07796	11.6775	4.21736e-22	1.42608e-20	39.5799	UP	6.19659	5.82176	6.97756	5.37846	5.01692	6.27821	5.80202	6.6656	5.3609	5.71545	5.50251	5.3605	6.1683	5.68766	6.04529	5.79144	5.53056	5.6421	5.96055	5.33783	5.79608	2.82422	3.68031	3.73165	2.85417	3.75608	4.7374	3.11233	4.44213	4.88456	5.2312	3.053	3.05147	2.92776	2.89786	2.97205	4.45027	3.85291	3.70467	3.86935	3.53069	6.89116
INSM1	1.48473	4.25202	6.40816	2.37547e-09	1.14224e-08	10.5412	UP	5.52169	5.26116	5.02956	5.00865	4.97711	5.4871	5.4488	5.50334	6.22305	5.54983	6.11914	5.30403	5.26345	5.91501	5.70279	5.60697	5.43404	5.70443	4.90388	6.24803	5.29933	3.47161	3.44954	5.06928	3.13002	3.79976	3.26827	4.19581	6.68799	3.69123	5.56553	5.09618	5.21878	3.19229	3.72704	3.26567	5.92625	4.77622	3.67848	3.38517	3.10644	3.61538
IQCJ	-1.10222	5.24149	-9.37294	2.51502e-16	3.46207e-15	26.3869	DOWN	4.14164	4.0974	4.36993	4.45751	4.36386	4.10975	4.35316	4.19695	4.2575	4.30168	4.28361	4.2395	4.40479	4.68735	4.25405	4.4838	4.21473	4.28693	4.17056	4.64098	4.29139	5.45991	5.98052	4.7337	5.49222	5.60449	5.24255	5.91185	6.07922	4.84921	4.81726	6.06756	5.72497	5.417	5.7963	5.59835	5.93728	5.69904	6.04059	5.10772	6.55459	5.38781
IRF2BP1	-1.00422	6.43903	-12.1142	3.3633e-23	1.41023e-21	42.0916	DOWN	5.37314	5.6937	5.70887	5.72946	5.73325	5.60882	5.63857	5.55326	5.55303	5.62524	6.03813	5.67008	5.28471	5.44174	5.8601	5.4981	5.65253	5.49313	5.39179	5.60092	5.33739	6.20068	6.57327	6.8685	6.58045	6.44767	6.91026	6.60511	7.79322	6.53751	6.83313	6.38604	6.86975	6.40935	6.68622	6.43392	7.81036	6.85226	6.64705	6.52724	6.53353	6.89046
IRF3	-1.21336	8.28543	-15.555	1.10397e-31	1.79416e-29	61.4988	DOWN	6.93971	7.2293	7.56326	7.65416	7.13577	7.4963	7.05892	7.05308	7.18699	7.0244	7.49717	7.15764	7.29652	7.49171	7.1947	7.05318	6.97001	7.47149	7.15296	7.53243	7.40764	8.72952	8.41358	8.50709	9.00179	8.67323	8.49943	8.35279	9.10999	8.50182	9.09251	8.63119	8.97713	9.02206	8.56996	8.62637	8.66007	8.77459	8.4626	7.8153	7.93772	8.2733
IRX3	1.80476	6.0874	9.51166	1.13981e-16	1.65256e-15	27.171	UP	6.93526	8.17248	7.72441	8.7697	8.27052	8.20563	7.67442	7.92342	8.53784	8.03295	7.93881	7.69293	6.918	6.42515	6.32286	8.33321	7.28834	8.33646	6.61706	7.0882	6.4983	6.16606	5.12477	5.51084	5.40781	5.38861	7.36731	5.80574	5.46787	6.47131	7.37287	5.03326	5.09563	5.26733	5.65558	5.17344	5.6191	5.80551	6.92061	7.82863	5.25606	6.76256
ISG20	1.68509	8.67685	8.29907	1.05604e-13	9.66806e-13	20.4103	UP	10.4497	10.1523	10.5297	9.62588	9.64244	10.0333	10.1897	10.2588	9.56467	10.1212	9.72158	11.1205	10.0784	10.2306	10.3216	9.67127	9.96109	10.109	10.7051	9.69464	9.78938	7.98454	8.03481	8.74802	8.63686	8.89755	9.17558	7.39671	8.54517	8.97491	9.38437	8.49515	8.16186	7.18289	7.95266	8.30283	8.56349	8.05705	8.1563	8.61149	6.47294	7.93532
ISLR	-2.87226	7.00764	-10.5067	3.72559e-19	7.91357e-18	32.846	DOWN	4.03044	4.67927	4.82983	4.71666	4.82941	4.98048	4.49317	4.60014	4.81166	4.0806	4.5452	4.5833	4.31763	4.98705	4.43416	5.07078	4.40076	5.35355	4.12226	4.57521	3.99733	8.72173	8.29305	7.56919	7.02901	7.8454	7.27064	8.29318	8.84646	6.96627	6.20622	8.50377	9.56083	7.74291	8.81563	9.01807	9.83225	7.52558	7.98234	5.24942	8.6124	10.3212
ITGA1	-1.20581	6.0574	-5.51259	1.78072e-07	6.37298e-07	6.32336	DOWN	5.38259	4.97191	4.84805	5.29151	5.11269	4.90991	4.85269	4.68027	5.00196	4.76852	4.56093	5.37823	5.10536	5.42789	4.95123	5.12194	5.04092	5.14709	5.07685	5.18385	5.09748	6.51872	6.56698	4.89722	5.96385	6.52049	5.55062	7.02384	5.9497	5.53624	5.32682	7.24637	7.05727	5.67567	7.07281	6.53498	5.37925	7.27389	6.51934	4.62943	8.09674	5.96657
ITGA5	-2.88628	7.67266	-11.3791	2.37911e-21	7.0152e-20	37.862	DOWN	5.01322	5.28044	5.26473	4.62208	5.17907	5.95393	5.84735	4.68118	5.05002	5.20047	5.62431	5.57612	4.65789	4.98767	5.22374	4.56329	5.33325	5.4866	5.70779	5.2834	5.62011	7.69852	9.4556	7.41085	8.02122	8.40726	7.64962	9.63635	10.5604	7.66203	7.32022	9.04898	8.57442	8.49362	8.67543	9.29183	11.3312	9.33667	10.1694	7.5216	10.8155	7.4487
ITGA7	-2.01557	6.53771	-7.62393	4.22655e-12	3.0471e-11	16.7681	DOWN	4.70881	4.76128	4.73727	5.76533	4.83819	4.57767	4.5999	4.94507	4.74893	4.73698	4.2732	4.45883	5.05271	5.02069	4.6871	5.24934	4.7984	4.94641	4.86108	4.65543	5.27613	7.36774	8.31519	6.13696	6.18236	7.96283	6.42904	8.15539	8.93276	5.87834	5.77229	8.6362	7.67008	6.51695	7.68571	7.24401	9.6241	7.96838	7.89652	6.47566	9.25151	5.72207
ITGB2	-1.0201	6.22131	-7.73312	2.34388e-12	1.75561e-11	17.3495	DOWN	5.393	5.34036	6.47933	5.2412	5.08442	5.41807	4.93919	5.09131	5.26998	5.29287	4.91668	5.59676	5.18608	5.52589	5.13494	5.24734	5.14957	6.37551	5.73167	5.07598	5.14344	7.3484	6.74991	6.068	6.56516	6.39424	6.44287	6.54352	7.21968	6.07518	5.94729	6.6662	6.82816	6.06536	5.97899	6.52565	6.37573	6.01767	7.12312	6.07948	6.60304	5.94799
ITGBL1	-2.40248	5.62422	-8.60502	1.92435e-14	1.96035e-13	22.0935	DOWN	3.58076	3.85286	3.40716	4.18139	4.46283	3.39258	3.53766	3.44083	3.69631	3.49484	3.42912	3.50359	3.45228	3.49022	3.36623	3.86712	3.54594	3.43467	3.44857	3.55881	3.53935	7.92989	6.83163	6.06728	4.35956	7.34879	5.57608	6.21281	4.81774	4.91438	3.91726	7.56255	7.56578	6.85993	6.42973	6.00777	5.12562	5.83631	5.79066	4.44743	7.03991	5.10029
ITPKA	2.74452	5.46392	14.8594	5.28806e-30	6.52142e-28	57.6554	UP	7.40869	7.14541	7.76191	7.57834	7.2067	7.80579	7.84541	7.98674	7.4311	8.07759	8.33676	8.42491	8.15347	8.10998	8.47315	7.42769	8.09284	7.38954	7.43611	8.13964	6.9763	3.8628	4.09623	5.73529	4.24534	3.96437	6.24782	5.38748	4.54061	6.36747	6.65693	4.14608	3.96673	4.71474	5.98195	5.64586	4.36746	5.43655	4.36647	6.50876	3.7178	5.29115
JAG2	-1.0195	6.55983	-9.40926	2.04478e-16	2.84653e-15	26.592	DOWN	5.48297	5.50186	5.87336	5.83328	5.63146	5.84832	5.86031	5.69564	5.68502	5.49598	5.69606	5.9451	5.72713	5.76361	5.66926	5.86193	5.66518	5.90835	5.25663	5.85035	5.50104	6.73188	7.28935	6.51387	7.43391	6.72531	6.3497	7.2961	7.43967	6.39215	6.5075	7.21992	6.90296	7.07239	7.40648	7.14811	8.15902	6.72841	6.77931	6.85355	7.05389	5.96955
JAM3	-1.33593	5.928	-6.75551	4.08573e-10	2.20823e-09	12.2685	DOWN	4.78552	4.76306	4.91989	4.59044	4.6171	4.76006	4.89659	4.73986	4.7121	4.80353	4.89237	4.83259	4.87173	5.15993	4.92851	4.74483	4.86619	4.91531	4.59725	4.71138	4.78843	6.42602	7.06421	5.73917	5.24747	7.14976	5.60123	6.91433	7.2811	5.47012	5.51005	7.80413	6.82014	5.58378	6.57665	6.47197	6.25604	7.01485	7.17653	4.99579	7.4062	5.34708
JCHAIN	2.72068	11.199	6.97077	1.34413e-10	7.80815e-10	13.3612	UP	13.5682	13.411	13.8778	13.5785	13.1652	13.59	13.4756	13.2091	13.2324	13.312	13.5163	13.4942	13.7148	13.5288	13.1852	13.6849	13.5648	13.659	13.5211	13.4327	13.5024	9.90262	10.3295	11.7508	8.93314	10.2579	12.9364	11.0692	10.3719	12.1185	12.5966	11.2097	9.30396	7.98056	11.5344	9.24088	8.64476	12.2537	10.8472	10.8482	6.68594	11.4383
JPX	1.08963	4.60136	13.1666	7.81004e-26	4.93185e-24	48.117	UP	5.29404	5.29472	5.79898	5.81864	5.49354	5.32693	5.96797	5.3185	5.82948	5.2435	5.78994	5.66577	5.68452	5.73983	5.75285	5.50854	5.25188	5.44477	4.94597	5.57324	5.127	4.76083	4.5074	3.9456	4.34933	4.2349	3.8728	4.56605	3.64094	4.91132	4.15215	5.07194	4.53205	4.63603	4.70986	4.26176	3.44983	4.26359	4.1063	3.68266	4.44146	4.58073
JUNB	-1.38682	8.7485	-10.6037	2.12628e-19	4.66291e-18	33.4025	DOWN	7.64236	7.13257	7.9312	7.31508	7.28352	7.64492	7.62258	7.85564	7.1865	7.79596	7.67905	7.56622	7.80944	7.52201	7.78263	7.46384	7.34913	7.78045	8.02523	7.44782	7.39246	9.53191	9.62085	8.03824	10.122	9.4641	9.29351	8.6506	9.45594	8.56417	8.39853	9.60946	9.42379	9.49285	8.97765	9.17856	9.39535	9.22016	8.45539	8.95973	10.7932	9.03663
JUND	-1.16704	6.76128	-12.5371	2.92152e-24	1.43779e-22	44.5187	DOWN	5.83013	5.78721	5.78843	5.75441	5.66152	5.9757	5.4582	5.6305	5.67469	5.72768	5.72813	5.9737	5.85668	5.75013	5.51806	5.74834	5.94203	5.61582	6.16495	5.96545	5.82639	6.68105	6.91081	6.60079	7.19322	6.91194	7.20628	7.08532	7.67521	7.24294	7.30922	7.2339	7.36131	6.79579	6.83325	6.94812	8.1228	7.34165	7.11089	7.79687	8.05565	7.29882
KANK4	2.01902	4.68493	11.4939	1.223e-21	3.78733e-20	38.5227	UP	5.39187	6.07488	6.89223	6.94659	6.79495	6.6372	6.73832	6.71532	6.86181	6.80515	6.94519	7.32511	6.25094	6.85757	6.32056	6.8621	6.21304	7.10477	3.75615	7.01868	3.52512	6.0721	3.77938	4.0803	4.37399	3.62398	4.74454	4.1305	4.90792	4.13388	6.14302	3.92047	3.78872	3.88857	3.99415	4.55121	4.95482	4.59594	4.37289	3.9305	5.49715	5.98774
KAT2B	1.02948	7.48985	7.3073	2.29569e-11	1.48868e-10	15.1004	UP	8.20337	7.89312	8.43191	8.48932	8.36332	8.21208	7.83898	8.38914	8.31033	8.39846	8.43318	8.89024	8.49154	8.35388	8.35772	8.4153	8.38841	8.0456	8.67859	8.64591	8.23614	7.81781	6.98951	6.65423	6.14386	7.55767	7.33858	7.15454	7.13615	6.93414	7.47537	7.91069	7.34514	7.49472	7.09335	7.06761	5.61714	7.81375	7.52329	5.48762	7.95805	9.06021
KAZALD1	1.19734	5.62165	14.7316	1.08176e-29	1.29594e-27	56.9443	UP	6.37634	6.55745	6.55577	6.6308	6.46781	6.70717	6.60395	6.83443	6.54235	6.91171	6.93484	6.99545	6.68009	6.69936	6.85573	6.53771	6.45014	6.66603	6.33358	6.82189	6.0359	5.27809	5.14971	6.19435	5.2818	5.19543	5.76704	5.23211	5.56314	5.87152	6.15667	5.09613	5.08286	5.12031	5.44275	5.15225	5.91145	5.68579	5.40611	6.032	5.31858	5.09971
KBTBD12	2.28504	4.58852	12.0776	4.15738e-23	1.71574e-21	41.881	UP	7.5387	6.24404	6.05741	6.30089	6.39733	7.70954	7.42389	6.95406	5.45469	6.95605	6.43929	6.22269	6.54546	5.57621	6.5974	6.0512	6.12108	6.44001	7.02044	5.09454	7.56587	3.29682	4.17583	4.20282	3.05996	3.65815	5.18369	4.02763	3.81949	4.71231	3.82368	3.76945	3.45078	4.33917	4.10087	3.62213	5.2427	4.09372	4.6245	5.11877	3.96828	5.12984
KBTBD2	-1.07888	7.22319	-13.8555	1.52616e-27	1.23537e-25	52.027	DOWN	6.60209	6.228	6.23747	6.00238	6.38795	6.27626	6.27358	6.42422	6.30639	6.40499	6.18589	6.43769	6.10988	6.29079	6.36528	6.15228	6.6971	6.2592	6.49259	6.2223	6.27861	7.62832	7.2922	7.51522	7.46922	7.54625	7.23665	7.29019	7.0072	7.21156	7.08541	7.69046	7.48869	7.57698	7.36694	7.55104	5.83796	7.42237	7.1068	7.02863	7.80867	7.28819
KBTBD3	1.17679	4.66517	14.6904	1.36366e-29	1.58829e-27	56.7142	UP	5.38121	5.40991	5.63952	5.5672	5.989	5.78435	5.62765	5.74187	5.86067	5.76333	5.7648	5.7266	5.67612	5.42757	5.88645	5.76954	5.66776	5.72645	5.19228	5.8537	5.29371	4.30857	3.97509	4.18958	4.24985	4.47241	4.73787	4.52907	4.44701	4.42374	4.56644	4.44777	3.96146	4.57493	3.90891	3.81701	3.72418	4.3434	4.66682	4.10969	4.18806	4.30584
KBTBD7	1.34527	5.71833	12.0903	3.86243e-23	1.61306e-21	41.9541	UP	6.8426	6.71817	6.83077	6.70665	6.86832	6.71604	6.73767	6.80884	6.87525	6.83297	7.27984	7.08721	6.83798	7.07879	7.05844	7.01447	6.7992	6.76244	6.1758	7.19758	6.61209	5.39295	4.76456	5.60946	5.61442	5.39955	5.36578	5.26748	5.39097	5.57679	5.99618	5.54263	4.96504	5.20767	5.25114	5.41757	3.71195	5.7331	5.5078	5.20798	5.01217	5.4098
KCNE2	3.02902	6.98915	7.61539	4.42545e-12	3.18283e-11	16.7227	UP	8.5035	9.40774	9.34956	10.9557	12.2138	9.79534	9.07146	10.887	10.8715	10.1429	9.64079	9.95279	8.85252	9.5557	9.45773	10.9299	9.11776	9.49696	6.40168	9.99751	5.66009	4.79874	5.69301	5.84018	5.21443	5.22557	10.2441	6.87753	4.82213	8.28002	9.46601	5.16705	5.2715	5.05442	5.90177	6.22886	6.37294	7.21379	4.80319	6.9336	4.5245	10.75
KCNJ15	1.50798	4.84343	8.41255	5.62712e-14	5.33089e-13	21.0325	UP	5.55579	5.413	6.10895	7.91648	7.25629	5.73006	5.93714	6.70331	7.44991	6.49977	6.46927	5.91866	5.63133	4.87523	5.54076	7.14247	6.65358	6.06284	4.66453	7.05315	3.75911	3.96305	4.2728	4.14415	4.19826	4.18227	6.75294	4.15085	4.10429	6.44092	5.34124	4.2858	4.28524	3.81598	4.1562	4.15484	4.62491	4.32513	4.04134	4.73107	4.28074	5.38354
KCNJ16	2.07461	3.72644	8.19748	1.85139e-13	1.63223e-12	19.8556	UP	4.23826	3.63507	5.47755	7.70971	8.14007	5.9019	4.38878	6.76342	6.74443	5.50559	5.24995	5.28882	4.75695	5.45093	4.40363	6.44181	5.32712	5.00045	5.19335	6.34973	2.92349	2.97929	3.03228	2.85744	2.6039	2.79582	6.22526	2.89044	2.90275	5.34297	4.95542	2.83238	3.06767	2.75579	2.7438	2.76284	2.89681	2.58644	3.0574	3.3455	2.87914	5.98181
KCNJ8	-2.21875	6.29194	-11.099	1.20671e-20	3.18624e-19	36.2499	DOWN	4.61364	4.40218	4.20144	4.46202	4.41679	4.44274	4.60562	4.59463	4.33331	4.16249	4.46076	4.25217	4.59955	4.68647	4.13213	4.87008	4.33491	4.46045	4.30661	4.40874	4.20299	6.64473	7.94483	5.8386	5.87539	7.58979	6.70002	6.95724	7.33862	5.44328	5.70556	8.07161	7.37242	6.17558	7.49267	7.18906	7.20933	7.28559	7.83675	4.86389	8.21645	5.91052
KCNK1	1.13144	6.36081	5.8456	3.72395e-08	1.48852e-07	7.84871	UP	7.3333	7.19172	7.425	7.27915	7.08805	7.57552	7.41391	7.46154	7.14187	7.52891	7.4732	7.29088	7.12373	7.55015	7.31773	7.18169	7.39092	7.11964	7.39255	7.41334	6.8645	6.23909	4.93152	6.16549	6.33235	6.8075	6.68975	5.51067	5.78252	7.31325	7.1888	5.50342	5.71339	6.86315	6.37265	6.40394	4.73363	6.41213	5.24278	5.89518	4.29436	5.74713
KCNK10	1.84778	4.36732	19.7225	3.04861e-41	2.45824e-38	83.3373	UP	5.33484	6.01267	5.72106	6.06918	5.48599	6.23189	6.289	6.51143	6.02115	6.13743	6.53494	5.55558	6.01965	5.93476	6.24996	5.7963	5.38727	5.34086	5.31147	6.45328	5.94526	3.90328	3.8869	4.92622	3.4699	3.99455	4.2858	3.99001	3.58477	4.43148	4.81349	4.09525	3.68551	4.14345	4.13571	4.34023	4.22726	3.93717	4.24612	5.04649	3.71894	3.48273
KCNK5	2.12974	6.77374	10.9843	2.34604e-20	5.89746e-19	35.59	UP	8.47359	8.86752	8.19587	7.76753	7.75555	8.51439	8.65662	8.62674	8.2662	8.85703	8.57157	8.36651	8.72914	8.54789	9.05598	8.23056	8.61946	8.36319	9.4361	8.96577	8.99061	6.00734	5.45512	7.56146	6.41002	6.80393	6.61779	6.40753	6.74278	7.77857	7.28094	6.33248	4.82218	5.96037	7.34295	8.078	6.89749	7.1166	6.78288	7.86412	5.09189	5.4788
KCNK6	1.35784	6.89397	11.6824	4.10093e-22	1.3912e-20	39.6077	UP	8.01925	8.32427	8.2938	7.28917	6.98315	8.03277	8.42253	7.9563	7.48926	8.21628	8.20683	8.17326	7.84758	8.24417	8.3233	7.89218	8.13778	8.1184	8.75035	7.74812	8.28276	6.85438	7.02423	7.65041	7.25625	6.511	6.57262	6.89213	7.09051	6.98441	7.57301	6.39915	7.0007	5.78677	7.09636	6.52407	6.55717	6.86049	6.62357	8.31335	6.31058	7.00346
KCNMB1	-1.35918	5.66065	-6.29455	4.18407e-09	1.9424e-08	9.98653	DOWN	4.18897	4.32324	4.52015	4.72877	4.42201	4.36063	4.48721	4.51618	4.38094	4.54805	4.44481	4.59355	4.51027	4.742	4.4674	4.65993	4.52047	4.43659	4.60807	4.71173	4.70076	5.81943	7.08654	4.77906	5.55884	6.11445	6.00433	7.02968	7.29882	4.95949	4.80778	6.51674	6.09006	4.78326	6.53007	5.64551	8.29007	6.48102	7.01023	4.58325	7.65278	4.87754
KCNN4	1.1368	6.92153	5.1732	8.30757e-07	2.68986e-06	4.82709	UP	7.82396	7.5981	7.85416	7.87662	7.54208	8.02088	8.06408	7.81462	8.05497	8.13418	8.06243	7.75222	7.57876	8.07334	8.0834	8.19047	8.07116	8.1913	7.03191	8.5168	7.09157	6.28436	5.4734	7.73164	6.55246	7.02553	7.25006	6.24608	7.54078	7.12469	8.55313	6.32292	5.17018	5.34302	7.86383	8.3984	7.89085	7.69214	6.50017	5.89857	4.88906	5.4019
KCTD12	-1.32897	9.60064	-6.96352	1.39571e-10	8.08537e-10	13.3241	DOWN	9.02043	8.23366	8.83127	8.54206	8.235	8.40784	8.47408	7.93006	8.58026	7.97275	8.52836	8.21805	8.24115	8.52561	7.97975	8.50538	8.71081	8.96273	8.43657	8.79103	9.01819	10.6008	10.1946	9.73242	8.84034	10.4027	9.67498	9.9369	10.2377	8.66191	9.20713	10.3456	10.5504	8.99662	9.49534	9.88479	8.61979	10.1789	10.18	7.64169	10.5611	11.829
KCTD3	1.0703	7.54158	7.7172	2.55475e-12	1.90335e-11	17.2646	UP	8.74311	8.4868	8.26969	8.22029	8.58382	7.89311	8.42328	8.20017	8.45826	8.57399	8.67413	8.50316	8.64026	8.16562	8.80488	8.5645	8.49869	8.16286	8.44128	8.302	8.66383	7.07982	6.54203	7.45333	8.12601	7.44796	6.90091	7.38597	6.70553	7.71254	8.00408	6.93329	7.62954	7.09902	7.34049	7.23047	4.43023	7.69977	7.07587	7.28265	7.32546	7.48167
KDM7A	1.04997	6.56741	8.57352	2.29478e-14	2.31076e-13	21.9194	UP	7.76178	7.46073	7.18382	7.43061	7.10368	7.49395	7.66759	7.69546	7.30701	7.48941	7.41463	7.57811	7.28121	7.60361	7.43935	7.01185	7.62542	7.12627	7.86375	7.43807	7.48077	6.87251	5.90353	6.89834	5.80066	5.79496	6.63686	6.33358	5.13712	6.8134	6.96951	6.41117	6.4264	5.69821	5.70649	5.86096	4.3049	6.41966	5.76209	6.39773	6.27255	6.13515
KDR	-1.01593	6.92679	-6.64504	7.18521e-10	3.75001e-09	11.7142	DOWN	5.9901	5.85303	5.94254	6.41974	6.77744	5.77564	5.84623	6.16032	5.88152	5.90074	5.88877	6.05334	5.75641	6.22506	5.89068	6.42712	6.31751	6.24203	6.10542	6.16995	5.89866	6.18819	7.85386	6.797	6.5033	7.16489	6.77013	8.56391	7.33278	6.99977	7.07693	8.16563	7.50013	7.11652	8.31497	8.15626	6.63896	7.1603	6.59002	7.7282	8.16897	6.35991
KHNYN	1.01103	7.93215	15.6208	7.67549e-32	1.25716e-29	61.8598	UP	8.63384	8.75002	8.95953	8.56761	8.49967	8.95995	8.74921	9.15953	8.71548	8.99552	9.0586	8.9568	8.57667	8.7996	8.85736	8.71664	8.58949	8.66063	8.72249	8.96656	8.53388	7.72503	7.48016	8.01825	8.00006	7.83583	8.01798	8.23268	7.91387	8.12699	8.3488	7.88943	7.68518	7.07582	8.10896	7.7566	8.32416	7.73936	7.57104	7.90771	7.60091	7.33971
KIAA0232	1.05898	6.59785	11.1869	7.2509e-21	1.99233e-19	36.7556	UP	7.53838	7.28064	7.45891	7.79448	7.58007	7.255	7.36204	7.63936	7.2817	7.38891	7.62448	7.61345	7.45142	7.85292	7.4282	7.33664	7.52395	7.42731	7.36438	7.772	7.28125	6.29154	6.34534	6.27371	6.6775	6.23621	5.99436	6.48955	5.36747	7.07904	6.89606	6.61692	6.14723	6.26431	6.72907	6.61658	5.13694	6.51358	6.34542	6.71999	6.59706	7.25548
KIAA0895	1.58808	5.05873	9.26664	4.60592e-16	6.06552e-15	25.7876	UP	6.2186	6.19666	5.85674	7.27052	7.0965	5.42989	6.12056	6.3756	6.69664	7.25423	6.92009	6.23713	5.62482	6.43284	6.62096	6.44593	6.59774	6.03908	6.11733	6.45686	6.26868	4.21739	4.01379	5.84397	5.20153	4.48245	5.5127	3.85073	3.88258	5.2101	4.95365	4.04158	4.27528	6.11784	4.05867	4.0725	3.58111	5.05189	4.48245	4.34896	4.58393	5.37442
KIAA1033	-1.0729	8.40771	-12.0329	5.38504e-23	2.17304e-21	41.624	DOWN	7.61577	7.33975	7.65104	7.36369	7.52711	7.55411	7.54596	7.10714	7.35102	7.588	7.56183	7.36171	7.47243	7.52883	7.43087	7.439	7.79784	7.74334	7.71281	7.39277	7.53047	8.84683	8.7624	8.72882	8.60718	8.58904	8.20911	8.29897	7.93573	8.06615	8.14641	8.62885	8.82092	8.90489	8.49993	8.33943	6.60569	8.39833	8.28452	8.02888	8.60503	8.96492
KIAA1147	1.22886	7.59777	11.0262	1.84062e-20	4.71168e-19	35.8308	UP	8.0032	8.12826	8.63381	9.36123	8.84628	8.82506	8.69952	9.00466	8.90645	9.21695	9.0865	8.66493	8.69242	8.48738	8.81149	8.6993	8.5488	8.44361	7.94582	8.76532	7.48276	8.54516	7.04928	7.59407	6.99071	6.8191	7.73008	7.62659	6.79562	7.93671	7.92518	7.38856	7.88612	7.45829	7.73192	7.20397	6.62995	7.04848	6.8026	7.59328	6.62853	7.09224
KIAA1324	1.36569	7.32436	4.05784	8.41579e-05	0.000196207	0.384918	UP	8.15174	8.44533	8.31883	8.95359	8.69569	8.63554	8.42633	8.59896	9.07144	8.74109	8.82807	8.7151	8.33504	8.5256	8.44423	8.52227	8.4086	8.31021	7.49505	8.57719	7.72856	7.8722	4.3731	7.5189	4.36648	6.82403	8.54257	8.22783	9.22237	8.36893	9.15549	6.19339	8.48657	5.35027	8.64589	7.12501	8.08655	7.90461	8.07377	7.83369	4.25878	8.02313
KIAA1522	1.4823	8.414	10.1142	3.58936e-18	6.62421e-17	30.5989	UP	9.70262	9.58784	9.54478	9.67955	9.42014	9.75383	9.40838	9.55712	9.45564	9.74732	9.63691	9.81923	9.80799	9.75341	9.79581	9.61706	9.66619	9.56147	9.94809	9.68931	9.71751	8.34193	7.4385	8.90218	8.70574	7.8528	8.39695	8.38828	8.45611	8.98073	9.2117	7.32617	7.79242	8.2391	8.71127	8.59245	8.6343	8.74893	7.38289	8.78844	6.89681	7.69925
KIAA1804	1.82319	6.76426	7.75541	2.07728e-12	1.57677e-11	17.4687	UP	8.04212	7.83177	7.573	8.81348	9.05595	7.97441	8.2335	8.67334	8.62971	8.51493	8.7157	8.26933	8.26609	8.39042	8.65906	8.50422	8.23657	7.84489	7.65298	8.54221	7.82158	6.49087	5.48561	7.01002	6.38068	6.89845	7.35743	5.02454	4.086	7.1382	6.97015	4.50421	4.97636	7.81394	6.59595	6.96024	3.64014	6.29165	5.8437	7.0139	3.22964	6.68149
KIF21A	2.35495	5.4627	20.0872	4.92134e-42	4.299e-39	85.1439	UP	7.77764	7.57104	7.04959	6.96169	7.19555	7.36453	7.65939	7.39606	7.23333	7.53974	7.57898	7.37076	7.35114	7.75961	7.70278	7.21454	7.61711	7.58996	7.80602	7.20047	7.36321	4.51833	4.49721	5.83626	5.53269	4.90592	5.08876	4.60186	4.31332	5.14227	5.55195	4.54828	4.70385	6.20745	5.14738	4.71325	3.56437	5.24965	5.46665	4.98239	4.61999	4.59789
KLB	1.04732	3.4761	9.54917	9.19901e-17	1.34583e-15	27.3834	UP	3.94589	3.87027	4.36304	3.88844	3.7802	4.1817	4.47236	4.50603	4.72634	4.27592	5.73469	4.94324	4.18345	4.47473	3.92405	4.13743	3.74035	4.54708	4.24098	5.42178	4.13499	3.23847	3.74096	3.14907	3.36646	3.0811	3.48966	3.22975	3.03032	3.10152	3.96218	2.99498	3.61928	5.01491	3.14989	3.06578	3.25198	3.09403	3.14267	3.1382	4.61709	3.42787
KLF4	1.52183	9.00352	6.8106	3.07843e-10	1.69751e-09	12.5466	UP	10.4278	10.2574	10.0654	10.1896	9.75531	10.4887	10.3478	10.2187	10.009	10.1502	10.5025	10.8652	10.3101	10.6604	10.7906	10.1717	10.4304	9.92482	10.0392	10.3249	10.0183	9.78627	7.72143	8.68768	9.07819	7.92507	10.1354	7.8719	8.23781	9.80935	9.77022	7.55784	8.75029	7.58528	8.46388	7.92695	7.42878	9.64616	8.03667	8.8148	10.1822	8.80045
KLHDC3	-1.38179	7.94684	-14.4022	6.90246e-29	6.92392e-27	55.1031	DOWN	6.50635	6.68587	6.81007	6.82838	6.82008	6.79726	6.73003	6.86064	7.07936	6.91352	6.83474	6.38436	6.73741	6.77653	6.87884	6.68872	6.74526	6.77242	6.99161	6.81631	6.82482	7.55347	8.37095	7.77388	7.9684	8.13867	8.21915	9.81125	8.711	7.95221	8.05267	8.17943	8.09791	7.87177	8.90717	9.37679	9.09207	8.40064	8.83579	9.1598	8.13008	8.44036
KLHDC7A	1.3175	4.60349	13.1174	1.03576e-25	6.46273e-24	47.8365	UP	5.35048	5.52099	6.06912	5.9268	5.81374	5.88121	5.19005	5.91835	5.37534	5.62006	6.01928	6.27952	5.53868	5.64253	5.99064	5.74401	5.71513	5.59881	5.74255	6.32252	4.67941	4.15349	4.34398	4.54362	4.82761	3.75405	5.36631	4.21756	4.05163	5.44924	5.05578	3.84892	4.00343	3.8309	5.01526	4.00727	4.33067	4.34349	4.13776	5.07349	4.0763	4.24786
KLHL23	-1.28586	6.48606	-8.04178	4.35962e-13	3.64868e-12	19.0097	DOWN	5.6	5.6033	5.07198	5.19944	5.00917	5.84562	5.63674	5.71299	5.64179	5.32981	5.37775	5.36484	5.45367	5.33355	5.11841	5.24522	5.51593	5.20938	5.40898	5.28124	5.54024	6.56971	6.60213	6.87461	6.25254	6.47425	5.75355	7.03229	6.16564	6.52724	6.45307	6.91136	6.49694	8.17195	7.76112	7.90003	5.94649	7.21688	7.03462	6.36492	7.543	8.59221
KLK10	-1.24279	5.12404	-4.46236	1.71511e-05	4.48457e-05	1.90541	DOWN	3.92368	4.28367	4.00857	4.27827	4.31249	3.82727	3.85048	4.03636	3.82245	3.61899	3.63318	4.19985	3.6448	3.77564	4.2297	4.08519	4.73626	3.7567	4.25361	3.85158	5.52956	4.30155	5.90974	7.90156	7.88873	6.11858	4.05494	5.29669	7.37513	8.29608	6.37516	5.70066	3.74381	5.33354	5.1467	6.68051	5.06049	4.09076	4.4808	5.44238	4.19082	4.08972
KLK11	1.96291	7.14392	6.04393	1.43248e-08	6.13772e-08	8.78211	UP	7.38725	8.1262	8.41084	10.0743	10.7099	7.8619	9.48096	9.19974	9.98118	9.01153	9.0587	9.27611	8.40183	8.82325	9.63077	9.46506	8.19216	8.61692	7.10962	8.92722	6.93996	5.15152	5.58655	8.24174	6.59204	8.62636	9.33522	6.23915	9.42239	9.83527	8.42285	6.62363	6.31037	5.59926	6.77254	8.17104	7.12316	6.25899	7.43675	6.53544	5.58963	9.10521
KLK6	-1.21429	5.45199	-3.57347	0.000492038	0.00101232	-1.2855	DOWN	4.3715	4.27819	4.82288	4.51837	4.40359	4.39123	4.67392	4.54899	4.82308	4.20424	4.19813	3.80791	4.56757	4.45478	4.43763	4.27056	4.64677	4.15592	4.78124	3.89746	4.79451	4.21497	6.23505	6.49874	8.45941	5.29693	5.2944	6.69912	7.2605	9.32017	4.87701	4.99261	4.20143	5.08443	6.06559	8.88475	5.28225	5.30363	5.12111	9.09984	4.4896	4.52127
KLRC2	1.43746	4.87188	5.78617	4.94191e-08	1.93586e-07	7.57254	UP	6.38498	5.73463	6.2957	5.80989	7.14806	6.17772	5.02806	4.71837	6.33616	6.57794	4.56889	8.1526	5.51926	6.76511	6.38681	6.5402	6.20015	6.73307	5.16453	6.43784	5.01378	3.82299	4.69152	3.29456	5.23559	4.48693	3.95473	3.59297	4.55065	4.37188	5.76041	4.1071	5.97503	3.34639	3.36274	4.00719	2.83065	4.92666	4.79226	3.13054	3.85077	4.28877
KRT17	-1.1986	6.10038	-4.42894	1.96347e-05	5.08854e-05	1.77567	DOWN	5.359	5.3405	4.88343	5.13393	4.6628	5.05253	5.02342	4.87779	4.91312	4.84703	4.55715	5.00583	4.68687	4.70609	5.00897	4.95966	6.05527	4.94154	6.08586	4.83383	6.00719	5.71209	5.32122	7.83408	6.25012	7.41914	5.10562	5.61555	10.3121	7.769	7.15714	5.96508	4.4885	6.17883	5.62725	8.46665	6.17037	6.34675	6.1323	6.5007	5.64909	4.82059
KRT20	4.86597	8.11324	7.21996	3.64345e-11	2.28903e-10	14.6456	UP	12.9078	12.7527	12.0871	11.8049	10.652	11.9683	12.6405	12.0279	10.3861	12.4412	11.8817	12.4242	12.9571	11.8566	12.0195	12.1748	12.5075	11.4192	13.539	12.4301	13.4285	10.0085	9.15502	11.6664	3.8078	3.62925	9.25274	10.9381	8.93741	11.2801	11.7294	3.45061	9.89962	3.94255	7.59184	4.13933	4.04192	9.51892	7.05337	6.70001	3.65785	6.21519
KRT8	1.38242	10.8789	4.95197	2.19625e-06	6.6644e-06	3.8857	UP	12.5659	12.4658	12.0211	11.4119	10.9318	11.9665	12.5482	12.0567	11.4636	12.1536	12.0031	11.9459	11.9879	11.5922	12.3312	11.8639	12.2127	11.847	12.8044	11.9325	12.7627	9.74455	10.4974	12.5969	11.9512	10.9661	10.8121	10.9841	11.1695	11.898	12.2581	10.1846	9.91441	11.5753	10.3995	10.7213	9.64737	11.281	10.3439	12.1097	7.27407	9.43841
KRTCAP3	1.29853	7.84995	6.23	5.75842e-09	2.61423e-08	9.67377	UP	9.06852	8.94523	8.48085	8.94693	9.05141	8.87573	8.86742	8.93025	9.17589	9.05991	9.21237	8.84305	8.88836	9.09356	9.17199	8.95884	8.99396	8.93767	8.48299	9.11433	8.6807	7.76998	6.3979	8.22283	8.46564	7.73384	7.83017	7.77931	8.11883	8.17688	8.43566	7.0734	6.43724	7.9858	7.57882	8.23503	6.89377	8.17809	7.93564	8.35124	4.91978	7.04247
LAIR1	-1.00544	6.73777	-9.80611	2.11137e-17	3.38417e-16	28.8421	DOWN	5.70969	6.05766	6.55084	5.90548	5.54342	5.85045	5.45619	5.80197	5.66043	5.8008	5.52431	6.2908	5.82685	5.50893	5.86056	5.85608	5.81682	6.68505	6.16359	5.74439	6.12389	7.32253	7.42214	6.5118	7.3884	7.14331	6.97665	7.04156	7.67058	6.96822	6.00901	6.76393	7.50749	6.77987	6.69853	7.31293	7.33105	6.50451	8.03777	6.89931	7.75657	6.57563
LAIR2	-1.69761	5.22061	-11.5661	8.04572e-22	2.57918e-20	38.9385	DOWN	3.64271	3.80273	5.20843	3.56679	4.0649	3.65237	3.71378	3.72798	3.97952	3.19374	3.16349	3.75221	3.26002	3.49512	3.49515	3.63791	3.391	5.41159	4.49495	3.31508	3.68503	5.93229	5.49816	5.64838	6.13708	5.80492	5.81758	5.15324	5.9075	6.34862	5.1389	5.47843	4.96885	4.99601	4.58224	6.08753	5.27986	5.15573	6.59586	5.55712	5.2191	4.75328
LAMA4	-1.01833	5.61319	-8.57189	2.31574e-14	2.32963e-13	21.9104	DOWN	4.67079	4.64288	4.88786	4.91378	4.75505	4.89235	4.60139	4.64648	4.71338	4.68574	4.65156	4.53457	4.91895	4.83557	4.76234	4.8027	4.7322	4.90955	4.76169	4.80286	4.77254	5.67713	6.27951	5.67796	5.40129	6.21556	5.44549	6.54906	5.89784	5.16872	5.17423	6.67846	5.99532	5.55574	6.28056	6.27354	5.97317	5.9994	5.91989	5.15514	6.9307	5.79221
LAMB3	1.46073	8.57633	6.14026	8.95266e-09	3.95059e-08	9.24185	UP	9.3522	9.78869	9.90262	9.84973	9.56332	10.0138	9.75063	10.0597	9.7475	10.0572	9.94151	9.85678	9.4752	10.2844	9.93537	9.76129	9.76949	9.64045	9.9943	9.67283	9.48109	7.003	6.86754	9.43111	10.1956	9.90755	8.8022	7.63103	8.99874	10.0657	9.51508	7.32011	7.93943	9.61409	9.5197	9.20629	7.04565	8.60528	8.10657	8.37662	5.42151	7.6197
LAMC1	-1.21883	9.09368	-8.98675	2.2506e-15	2.65525e-14	24.2168	DOWN	8.04882	7.94651	8.27779	8.10671	8.10203	8.06207	8.11995	8.03452	8.08448	7.7799	7.91981	7.72984	8.0719	8.34844	7.93141	8.15547	8.14208	8.28194	8.10776	8.09462	8.09779	9.04421	10.0576	9.12724	8.8156	9.78709	9.3044	9.74485	9.61783	8.94181	8.63605	9.94736	9.60386	8.50476	9.89537	10.0155	9.08187	9.71545	9.42706	9.0294	10.3965	8.74031
LAPTM5	-2.01232	9.9458	-13.1185	1.02883e-25	6.43862e-24	47.8432	DOWN	8.67061	8.1905	9.65982	7.85101	7.9214	8.25411	7.66858	7.90043	8.12709	7.93864	7.32248	8.84897	8.1846	8.38272	7.72148	8.33208	8.19807	9.60931	8.48473	7.9394	8.12006	11.0872	10.8948	10.1022	11.0034	10.4999	10.6474	10.2773	10.984	10.0377	9.51023	10.5102	10.993	10.0365	10.015	10.6786	8.84257	9.72536	11.3941	9.69556	10.3589	9.62256
LCOR	1.35706	8.04378	8.01776	4.9731e-13	4.13242e-12	18.8797	UP	9.55761	9.02037	9.10462	9.14138	8.6502	9.07113	9.14719	8.95516	8.88516	9.16925	9.15567	9.15492	9.50164	9.31995	9.18419	9.08032	9.3427	9.17875	9.86109	8.92053	9.48212	7.10734	6.26337	8.47676	7.94291	7.39659	7.45027	7.1897	6.53184	7.83225	8.35664	7.46704	7.04441	8.26705	7.52239	7.2207	4.93393	8.33604	6.63151	8.26798	6.25983	6.7038
LCP1	-1.33825	8.35529	-8.74538	8.76438e-15	9.4422e-14	22.8715	DOWN	7.31171	7.16157	8.20853	7.08933	7.23717	7.29001	6.64649	6.96217	7.40373	7.16214	6.32763	8.10403	7.07714	7.31094	6.80363	7.26056	7.15962	7.82867	7.5271	7.20968	6.74694	9.17979	8.66683	8.48555	8.8771	8.77589	9.25622	8.5841	9.09336	8.53493	8.12699	8.90147	9.01717	7.89756	7.96726	8.75116	7.46971	8.14688	9.37137	8.22082	8.88259	8.11775
LDHD	1.84974	4.90349	14.177	2.4629e-28	2.23526e-26	53.8392	UP	6.96289	6.74181	6.48412	5.90746	6.21473	6.24472	6.73264	6.86508	5.85484	6.76436	6.15938	6.26637	6.03799	5.93115	6.3384	6.37731	6.43028	6.31541	7.49726	6.46943	7.04243	3.85109	3.99379	5.63627	4.02602	4.2166	5.38475	4.65951	4.4629	5.73052	5.47515	3.7252	4.22339	4.64312	4.63181	4.43426	4.52633	4.7678	4.34056	6.01646	4.53325	4.86517
LGALS1	-1.54938	11.4715	-9.46522	1.48592e-16	2.11777e-15	26.9083	DOWN	10.1647	9.89212	10.3308	9.98289	10.0395	10.4932	10.2184	9.7452	10.2178	9.97326	10.1626	9.97845	10.4131	10.5068	10.0889	10.2866	10.1882	10.6018	9.92723	10.3538	9.97501	11.4923	12.275	11.3572	12.1735	11.9077	10.6318	12.1851	12.5626	10.9671	10.4964	12.3823	12.1723	11.5641	12.1994	12.4536	12.7721	11.9167	12.6908	10.7713	12.5368	11.8621
LGALS4	1.7392	11.2226	4.28356	3.50806e-05	8.742e-05	1.21984	UP	13.2986	13.0764	12.6817	12.0796	11.8964	12.3621	12.965	12.6867	12.1252	12.889	12.4311	12.6631	13.1073	12.1177	12.7835	12.4859	12.9223	12.1241	13.5885	12.4398	13.6637	12.4546	10.4114	12.849	9.29467	11.1824	11.2586	11.4638	11.0198	12.0781	13.0353	10.4501	12.4799	11.6242	11.6218	11.8269	11.0797	12.2763	11.5795	12.6148	4.2217	8.66591
LGALSL	1.16166	6.88779	11.4181	1.89719e-21	5.62583e-20	38.0867	UP	7.70175	7.96594	7.65745	7.73683	7.58925	8.09318	8.11857	8.06868	7.56651	8.13825	8.20861	7.88027	7.84537	7.79547	7.9525	7.54943	7.90792	7.44057	8.15677	7.74124	8.04288	6.42923	6.37087	7.34135	7.00404	5.98015	6.64924	6.43573	5.95267	6.90557	7.18984	6.39785	5.9939	6.701	6.56334	6.49057	6.03344	6.85669	6.35432	6.51027	6.65734	7.30184
LIAS	1.22413	6.32841	11.2594	4.76101e-21	1.33979e-19	37.1732	UP	7.74605	7.15848	7.07176	7.39044	7.47085	7.17845	7.37911	7.15848	7.76371	7.51437	7.20608	7.19197	7.43697	7.08934	7.25277	7.80937	7.49394	7.18767	6.9606	7.30135	7.75178	6.71297	5.8319	6.55088	6.27253	6.48238	6.17114	6.44984	5.46497	6.70249	6.67746	5.93312	6.12831	6.25084	5.84213	5.34802	4.81397	6.56959	6.38734	5.86764	5.29699	6.178
LIF	-1.43547	6.61966	-8.15852	2.29497e-13	1.9923e-12	19.6434	DOWN	6.23976	5.75565	5.31265	5.36452	4.58963	5.26854	5.40014	5.38309	5.23578	5.23682	5.3612	5.17887	5.35943	5.28415	5.57868	5.30566	5.79664	4.71182	5.86805	5.3016	6.13113	6.43081	7.61937	7.29475	9.41062	7.54054	6.74989	6.58039	7.49585	7.85686	7.03921	7.72316	6.01733	8.26841	8.33483	7.8198	7.32255	6.53659	5.47365	6.27961	8.77944	6.48293
LILRB1	-1.39334	6.32914	-12.1715	2.41405e-23	1.04352e-21	42.4209	DOWN	5.07273	4.94434	5.74444	5.04426	4.82053	5.05623	4.9355	4.9828	5.15869	5.15135	4.95986	5.34665	5.00302	5.24749	5.11965	4.98285	5.1401	5.66088	5.54592	5.14652	5.24304	6.60965	7.29595	6.37332	7.26747	6.28856	6.80919	6.16304	6.99548	6.11795	5.90792	5.93578	7.06371	6.34242	6.35969	6.81738	6.19691	6.01554	7.29204	6.17923	7.25483	6.1318
LILRB3	-1.00815	7.0822	-13.9851	7.30722e-28	6.12783e-26	52.7587	DOWN	6.20949	6.08888	6.90593	6.50221	6.18077	6.18525	6.14691	6.0507	6.02086	5.81132	6.13815	6.14194	6.28993	6.33159	6.01775	6.14004	6.24661	6.73856	6.42371	6.01647	6.336	7.11519	7.91244	7.22776	7.47504	7.17931	7.4643	7.00899	7.72134	7.09602	6.85691	6.93545	7.138	6.96462	6.86531	7.63531	7.46118	6.92173	7.76845	6.85577	7.68841	6.93432
LIMA1	1.64259	8.40825	10.6783	1.38094e-19	3.11305e-18	33.8307	UP	9.98309	9.91215	9.61063	9.46227	9.28539	9.75681	9.93031	9.58682	9.78424	9.81421	9.78947	9.59342	9.80265	9.69306	9.93734	9.71435	10.0047	9.72265	10.2718	9.7467	10.178	7.60854	7.30574	8.77016	6.73422	7.87668	8.12419	7.74831	6.82346	8.89781	9.14901	8.10162	7.94608	8.13368	8.0882	8.2497	6.61461	8.07433	7.06178	8.19084	7.70992	8.20906
LIMS2	-1.29534	6.95661	-5.25832	5.6763e-07	1.89015e-06	5.19658	DOWN	5.69711	5.66184	5.64902	6.04534	6.08926	5.81931	5.8947	5.69724	6.08396	5.68195	5.617	5.75376	5.7719	6.03307	5.77204	5.98372	6.25397	5.79856	5.91872	5.99878	5.99319	7.25268	8.54467	6.08855	6.55256	7.86543	7.19217	8.40724	8.97636	5.75506	6.19747	8.4254	7.75192	6.34249	7.80531	7.25099	9.75395	8.40771	8.79046	6.40663	9.14796	6.39468
LINC00116	1.10494	7.03438	12.4607	4.53865e-24	2.16749e-22	44.0811	UP	8.11131	7.42688	7.37279	7.69622	7.91725	8.0616	8.27744	7.81598	8.05688	8.04843	8.24669	7.85742	8.25941	7.80977	7.91563	8.21177	8.2159	7.73701	7.89693	8.12016	8.17885	6.08086	6.76268	7.19866	7.10702	6.65733	6.44712	7.15457	7.54992	6.98965	7.14458	6.97684	6.36402	6.75839	6.54141	6.47099	6.51122	7.14413	7.52327	7.86938	7.19123	6.21163
LINC00261	2.81987	7.1811	6.91559	1.78994e-10	1.02251e-09	13.0795	UP	9.23605	9.16876	8.90546	10.4468	10.4101	9.6006	9.66871	9.65934	9.90808	9.70398	9.81724	10.0062	9.40982	9.53591	9.89046	9.99319	9.34536	8.82585	8.1924	10.0443	8.831	8.11062	4.267	6.74586	3.62619	5.02747	9.40927	6.79501	8.31575	7.90343	8.9333	3.85929	10.1969	6.87507	5.83112	4.58863	4.5174	7.67334	8.36789	6.63768	3.3303	8.89255
LINC00483	2.18695	5.7188	6.87803	2.174e-10	1.22653e-09	12.8885	UP	8.65177	9.05007	7.01589	6.66552	5.87066	6.9781	7.87659	6.51944	6.53942	7.50907	7.24334	7.72415	9.28729	5.82655	7.1859	7.48435	8.1295	7.02534	9.5954	6.61084	9.92527	5.4584	3.97327	8.01022	3.63057	5.71817	4.7162	6.03933	4.38839	6.66876	7.07183	3.94021	5.03532	6.41328	4.86861	4.82044	4.12135	6.79179	5.68001	8.85215	3.28604	3.7046
LINC00520	1.34338	7.46424	8.25167	1.37265e-13	1.23087e-12	20.1512	UP	8.37392	8.23476	8.97932	7.83659	7.94999	8.86468	9.00216	9.68117	7.15096	8.98542	8.60023	8.24092	9.14217	9.19605	9.37686	8.2496	9.06623	8.20108	8.53873	8.34774	8.4535	6.66971	7.91268	8.85181	7.78786	6.78167	7.91071	6.70931	6.75268	7.77118	8.19295	6.50965	6.31234	6.30254	6.66683	6.45606	7.05295	6.68841	6.72104	6.80054	6.87267	7.03292
LINC00526	1.02001	6.35304	8.16662	2.19482e-13	1.9109e-12	19.6875	UP	7.54379	7.5791	6.78498	6.67725	7.15565	7.01524	7.1503	7.34079	6.85229	7.34643	7.27984	7.24207	7.75445	7.15924	7.21012	7.21687	7.05484	6.56425	7.51562	7.35079	7.63232	5.97796	5.63729	4.86573	4.44309	5.38387	5.97423	6.31648	6.47577	6.07008	6.94365	5.99116	5.79464	4.99326	6.40751	5.7459	5.81514	5.92729	6.06096	7.12558	6.05625	5.77432
LINC00543	1.05681	3.88433	7.1151	6.32538e-11	3.8427e-10	14.1026	UP	6.15716	5.23366	4.29079	3.8607	3.76892	3.98431	5.1483	4.47591	4.07507	4.66033	4.56755	5.00665	6.14177	4.19921	4.43675	4.25751	4.24707	4.54348	6.30445	4.98235	5.89144	3.0871	3.37357	4.05769	3.3129	3.40774	3.1678	3.72718	3.3665	3.92232	4.03709	2.91235	3.33679	4.99191	3.53751	3.70931	3.83317	3.64476	4.21743	4.42914	3.09158	3.40097
LINC00675	2.59385	6.16558	12.5852	2.2138e-24	1.11301e-22	44.7943	UP	8.08412	8.00866	8.01756	8.86741	8.64271	8.54641	8.40633	8.57829	8.54761	8.00525	8.89628	8.27468	8.20234	8.55811	8.59764	8.4986	8.45775	8.09516	8.19867	8.20462	7.59403	5.36286	5.38466	6.49775	4.34167	5.94839	7.44777	6.04914	5.74396	6.7381	7.27036	4.96629	4.54742	4.05818	5.15003	5.27407	5.85298	5.71746	4.59737	6.5612	4.06452	6.004
LINC00702	-1.11605	3.9426	-4.46693	1.68364e-05	4.40943e-05	1.92318	DOWN	2.83913	2.78208	3.09248	2.66562	3.13778	3.04198	3.35399	3.03369	2.56727	2.727	3.13208	2.80876	2.99199	3.67758	3.20063	3.13323	3.08803	2.9474	2.75472	3.03089	3.07988	5.96591	4.75515	3.07087	3.5998	3.56002	3.19553	4.27709	6.71484	3.43066	5.00957	4.1596	5.7416	3.52275	4.78213	5.64747	4.23146	4.24326	4.57746	2.57319	6.71453	3.19078
LINC00849	1.24284	7.335	10.4741	4.49932e-19	9.39524e-18	32.6588	UP	8.25092	8.12515	8.30031	8.52296	8.75629	8.40102	8.3693	8.54386	8.35706	8.70706	8.46386	8.17923	8.25146	8.52054	8.47654	8.59432	8.43477	8.14543	8.17393	8.50129	7.90717	7.29342	6.21622	7.67208	6.87834	6.90193	7.50624	7.00259	5.90885	7.28523	8.09202	7.30073	6.9452	6.8106	7.13796	7.07354	5.78213	7.56668	6.47136	6.54385	7.24932	7.51778
LINC00982	1.36741	4.83324	8.94452	2.85672e-15	3.31807e-14	23.9808	UP	5.22897	5.42722	5.913	6.91	7.87909	5.8484	5.23651	6.86431	6.26638	6.08455	5.66739	5.91421	5.66917	6.02656	5.83219	6.8236	5.82506	5.91556	5.12962	6.04439	5.13912	4.09238	4.319	4.25887	4.35607	4.22941	6.60028	4.57414	5.5496	4.96049	5.03605	4.00511	4.06069	3.89763	4.15533	4.284	4.996	4.57696	4.37804	4.74133	4.30539	6.08788
LINC00992	2.36382	4.54339	12.4592	4.57795e-24	2.18129e-22	44.0725	UP	6.5235	6.88471	5.48321	6.59522	6.6002	6.91897	6.8855	6.61798	5.69805	7.36875	7.08787	6.58824	7.12375	6.27107	7.40911	6.82661	6.82741	5.89082	5.34364	6.89312	5.31623	3.81652	3.87227	4.09882	3.68132	3.88561	4.15078	3.5065	3.41201	5.20682	5.94912	3.68546	4.23471	5.04347	3.57647	3.82578	4.38805	4.68083	4.44658	4.51117	3.66841	3.95546
LINC01003	1.18754	7.21214	8.67507	1.30016e-14	1.36699e-13	22.4813	UP	7.79965	8.04894	7.76979	8.60126	8.68468	8.02851	8.2556	8.32259	8.75602	8.69025	8.62339	8.37231	8.08238	8.54047	8.73326	8.59391	7.54352	7.73399	7.44873	8.4806	7.31598	7.22404	6.31393	7.30431	7.25219	6.69168	6.92793	8.05677	7.53909	7.15998	7.54997	6.65736	7.03723	6.63376	6.23893	5.95672	5.98406	7.36092	6.87946	7.84349	6.14464	6.33787
LINC01082	1.28946	5.03998	7.15999	4.99696e-11	3.07759e-10	14.3346	UP	6.13131	5.65654	5.93385	5.84679	6.09904	6.20973	6.51125	6.04559	6.36064	6.08774	6.41754	6.51719	5.95939	7.51256	5.81486	6.45219	5.79615	6.00469	5.07517	6.36587	5.8122	3.37763	4.33216	5.01207	3.88761	5.59066	4.49251	4.86036	5.49062	4.14984	5.10419	6.29944	3.4732	3.55598	4.74103	3.76738	4.37037	6.00765	5.14053	4.63303	4.54888	3.96448
LINC01094	-1.1995	3.95625	-6.52892	1.29453e-09	6.49122e-09	11.1365	DOWN	2.92489	3.02632	3.50725	2.74223	2.9726	2.93163	2.82048	2.94943	3.06758	2.8413	2.88954	2.65744	3.06707	2.78157	2.76547	2.76544	2.65916	3.50119	3.09583	2.99158	2.94108	4.75672	4.16066	3.70189	5.21719	4.41117	3.41029	3.42149	3.9634	4.67465	2.93503	4.03877	5.30531	3.83159	3.52081	4.73363	3.5086	2.93695	6.43201	3.47441	3.92596	3.79032
LINC01127	1.54616	3.969	12.5085	3.44501e-24	1.67187e-22	44.355	UP	4.43222	6.64059	4.52188	4.36735	4.9048	5.03075	6.89538	4.56507	4.65654	6.15138	6.82848	5.28788	4.4423	6.63759	5.33434	5.21453	5.1187	6.01968	4.33698	5.33982	3.92643	3.53696	3.98621	3.7781	3.99712	3.59761	3.86923	3.69415	3.63409	4.1933	4.5433	3.39779	4.10012	3.36956	3.4628	3.44725	4.09179	3.4494	3.62641	3.46923	3.5932	3.50447
LINC01133	2.34316	5.17077	11.4258	1.81475e-21	5.40429e-20	38.1308	UP	6.50072	7.10003	7.08497	7.5398	6.79304	7.29101	7.30706	7.13597	7.03668	7.23771	7.95213	7.13944	6.96307	7.22775	7.43958	7.11624	7.14307	7.0399	6.9854	7.24868	6.68202	4.40248	3.37798	4.94045	3.79008	3.68356	5.82598	4.43097	3.37565	6.07983	5.98314	3.32829	3.67485	4.47309	4.22323	4.11592	3.16048	5.09967	3.94519	4.98677	3.75804	4.49448
LINC01207	1.11431	5.96414	2.20997	0.0288238	0.0429276	-4.9965	UP	9.901	9.24126	4.56667	5.4611	3.92483	5.27816	7.65816	5.72109	5.55312	7.05486	6.11686	6.65649	9.57428	5.54436	7.88676	7.67418	8.04445	3.78936	10.3916	4.27592	10.61	5.11723	3.2576	9.14831	3.01154	6.09099	4.37092	6.98916	5.93387	8.40293	8.37576	5.83102	8.61846	2.8875	4.42181	3.36654	4.14959	7.92837	7.90641	4.49862	2.76359	3.77891
LINC01268	1.75396	4.08656	18.1593	9.15445e-38	4.08347e-35	75.3989	UP	5.49479	5.31969	5.54593	5.11501	5.50408	5.41253	5.37558	5.64225	5.61399	6.15486	5.68975	5.99553	5.72031	5.68242	5.53567	5.61409	5.75742	5.12907	5.19043	5.6946	5.6032	3.86786	3.83492	3.85073	3.34094	3.60654	3.84011	3.82529	3.41537	4.20848	4.49054	2.97323	4.40854	4.75891	3.47358	3.59537	3.84556	3.38092	3.43433	3.47127	3.22536	3.0834
LINC01279	-3.2729	7.30537	-8.37219	7.04128e-14	6.56967e-13	20.8109	DOWN	4.19743	4.29287	5.50096	4.63434	4.89126	4.10616	4.95685	4.26234	4.38998	3.91061	4.21951	4.58562	4.53585	5.76061	3.84986	5.74486	4.34129	5.41506	3.56306	4.30527	4.15259	9.07684	9.79154	8.2085	7.1176	9.24617	8.10749	8.41189	7.73491	5.81047	6.4193	9.33967	9.67525	7.05349	8.02159	7.98165	8.0501	9.46252	8.80869	3.78649	10.558	7.97828
LINC01503	-1.08827	6.11242	-7.17776	4.55085e-11	2.81857e-10	14.4267	DOWN	5.06763	5.19035	5.61432	5.08685	5.02585	5.38168	4.69457	5.42334	5.4478	5.17875	4.89489	4.79458	5.3667	5.41448	5.12327	5.07297	5.53624	5.95579	4.87356	4.93374	5.06572	6.71139	7.52484	5.86752	8.28102	6.33967	6.30762	6.59627	6.77842	6.87608	5.08643	6.88146	6.98625	6.15029	6.8134	6.77865	6.7092	5.86703	7.02995	7.9563	7.87296	5.94196
LINC01560	1.09945	4.51581	12.0562	4.70381e-23	1.92608e-21	41.7584	UP	5.3229	5.31459	5.2312	5.23271	5.14522	5.3325	5.17177	5.70681	5.80189	5.61966	5.71143	5.80527	5.70075	5.60607	5.36455	5.80551	5.37896	5.41451	4.96869	5.38868	5.22348	4.45437	4.16065	4.199	4.28425	4.52579	4.15412	4.50592	4.60171	4.12338	4.35601	4.92148	4.43691	4.785	4.27485	4.83845	3.80053	4.41011	4.24033	4.46753	3.85711	3.76787
LIPF	2.94244	8.62922	3.12886	0.00215851	0.00395915	-2.6635	UP	11.1034	13.7966	8.52549	14.3628	14.3231	10.7262	9.07324	13.7551	14.0804	11.4104	9.81223	12.3734	9.31241	9.70971	8.83947	13.8994	10.4926	7.66281	10.503	11.0371	8.37548	3.66024	4.0097	4.26454	3.71309	4.47711	14.2265	12.5562	7.10088	14.1997	13.6417	11.2796	3.7021	3.36738	9.69519	3.94907	4.12433	13.8102	3.54643	13.7431	3.22885	14.3709
LIPG	-2.01575	6.11316	-8.57424	2.28563e-14	2.30265e-13	21.9233	DOWN	6.0484	5.48889	4.37082	2.85348	3.52479	3.79876	4.34026	4.27786	3.96261	3.95615	3.2482	3.53425	5.61948	3.95593	3.96199	4.38241	4.95079	4.45067	6.30552	3.98262	5.7662	7.35438	5.33522	7.53718	4.90432	7.34722	6.07204	6.9721	7.75753	6.46525	5.44903	7.17578	6.18119	6.36854	6.06559	7.08115	6.08408	6.63894	6.44915	7.87661	7.71734	4.77771
LIPH	2.97086	6.35729	13.8227	1.83911e-27	1.47052e-25	51.8416	UP	8.72966	8.52865	8.73467	9.14565	8.77733	9.13588	8.97316	9.22453	8.73194	9.07943	9.19874	8.95445	9.07271	8.84973	9.18415	8.81093	8.89668	8.32169	8.77014	8.77358	8.07212	5.61177	4.64736	6.00059	5.79887	4.92128	6.5911	4.97217	5.49933	7.44965	7.8142	4.8183	5.09446	5.22905	6.31538	5.65441	5.18155	6.11017	4.63258	5.83219	4.28074	5.32956
LLGL2	1.1046	7.151	6.47627	1.6879e-09	8.31848e-09	10.8763	UP	8.14196	7.99233	8.02485	7.92558	7.75174	8.03532	7.98548	8.04624	8.11288	8.21149	8.11239	8.0963	8.12505	8.07941	8.3751	8.13961	8.09835	7.98254	8.37326	8.18933	7.8781	7.37411	5.49946	7.55034	6.88873	7.25857	7.03328	7.31532	6.81328	7.53157	7.59329	6.14636	7.43008	7.46969	7.45781	7.53396	6.93768	7.7213	6.33251	7.56049	5.24793	6.27422
LMAN1	-1.02626	7.51386	-10.4771	4.42048e-19	9.23982e-18	32.6763	DOWN	6.76864	7.09786	6.39509	6.82594	6.65914	6.7437	6.87971	6.80659	6.67519	6.77188	6.66122	6.47605	6.33068	6.61354	6.6319	6.41789	6.62207	6.62118	6.41282	6.53283	6.72433	7.37825	7.1699	8.20212	8.32201	7.61134	8.03091	7.17701	6.80053	7.82416	8.02531	7.69205	7.58355	7.49352	7.21564	7.27663	5.51697	7.52958	7.47431	7.08805	7.71756	8.04614
LMO4	1.37398	6.23368	11.5276	1.00601e-21	3.18114e-20	38.7166	UP	7.03586	7.07935	6.97952	7.49004	7.4672	7.47956	7.66305	7.39142	7.63762	7.75418	7.51833	7.56656	6.90963	7.44544	7.54814	7.33792	6.9944	7.81944	6.9377	7.49696	7.61818	5.32631	5.50937	7.04453	6.29447	6.28412	6.0953	5.49074	5.80711	6.34326	6.08814	6.1851	5.83611	5.15494	5.63049	5.77626	5.55348	6.24705	5.81677	5.03145	5.56587	5.9908
LMOD1	-1.9305	7.35218	-5.55897	1.43641e-07	5.22365e-07	6.53253	DOWN	5.56276	5.55482	5.98843	6.02248	5.6966	5.70955	5.89952	5.66776	5.66174	5.65565	5.52289	5.58406	5.59765	5.9846	5.63995	5.99422	5.62035	5.7777	5.41592	5.65299	6.09531	8.55921	9.53346	5.82106	6.74831	8.61147	7.66622	9.58668	9.9443	6.21788	6.90509	9.62733	8.684	6.56623	8.62746	8.20307	10.2555	9.60459	10.1374	5.52454	10.1135	5.7443
LNX1	1.43016	5.82425	10.7719	8.03162e-20	1.85444e-18	34.3686	UP	6.95816	7.21518	6.43406	7.28221	7.52549	7.14242	6.82923	7.10879	7.18084	6.93508	7.03681	6.83072	6.93022	6.49142	7.20248	7.21927	6.81794	6.80186	7.16933	7.41276	7.04038	5.91422	5.16714	5.58271	5.10141	5.43049	6.34622	6.06116	4.96968	6.20945	5.91449	5.16278	5.56783	5.4664	5.88037	5.31491	4.40953	5.64462	4.88346	5.57553	4.65881	5.56091
LNX2	1.11097	7.68673	9.67325	4.52273e-17	6.91101e-16	28.087	UP	8.81686	8.79165	8.4958	8.73289	8.60496	8.45084	8.56738	8.45164	8.34673	8.85129	8.60015	8.61135	8.93237	8.25552	8.80067	8.36692	8.52228	8.35476	9.02947	8.57113	8.88553	8.03694	7.30993	7.68206	7.45751	7.15568	7.92176	7.14364	7.07598	7.80145	8.00632	7.11591	7.30397	7.26088	7.82847	7.69455	6.07826	7.34748	7.16914	8.02503	6.77688	7.37251
LOC100129518	-1.48961	7.19634	-7.38933	1.48472e-11	9.8879e-11	15.5297	DOWN	6.26665	6.05109	6.47774	5.50793	5.83297	5.81106	5.85959	5.84262	5.62675	5.88808	5.67909	5.88051	6.09745	5.69405	5.78441	5.67764	6.0234	6.68422	6.11183	5.85627	6.16476	6.72382	8.11639	6.79005	9.57115	7.50337	7.64714	7.05422	6.93259	7.49047	6.42434	7.95825	7.87147	8.37679	8.2587	7.69188	5.60463	6.84268	7.99967	7.70778	8.42627	6.89899
LOC100287497	-1.04137	4.87958	-9.01599	1.90781e-15	2.27645e-14	24.3804	DOWN	3.24008	3.76017	3.97766	4.33508	3.88988	4.30994	3.98078	3.75473	4.02918	3.8535	4.87008	4.06703	3.97368	4.04587	3.88815	4.28307	3.58899	3.96275	4.1224	4.35504	3.79359	5.80412	4.32435	4.71608	5.29356	4.97409	4.88379	4.76565	4.46538	4.95117	5.93308	4.93956	5.27585	5.34067	4.95797	4.94933	4.91376	5.66762	4.24759	4.70999	4.56568	4.14793
LOC100287896	1.14323	5.73616	7.63159	4.05565e-12	2.93095e-11	16.8088	UP	6.51833	6.9517	6.63099	6.23228	6.8378	6.65849	6.41104	6.53457	6.86995	7.2785	6.97056	6.62747	7.05926	6.23022	6.83186	6.78495	6.6	6.61357	6.55935	6.75352	6.69337	5.28788	4.25477	5.87848	4.47931	5.92511	5.00456	5.67808	5.26535	5.74201	5.57012	5.42121	4.53187	5.64751	5.55362	4.90566	3.69676	5.89134	5.94096	4.69905	4.89019	4.39029
LOC100506098	2.11834	6.56372	10.0079	6.62147e-18	1.16264e-16	29.9917	UP	8.08532	8.28408	7.81127	8.40619	8.5336	8.2449	8.40608	8.63825	8.44171	8.514	8.59168	8.06923	8.7488	8.44319	8.71732	8.3713	8.08946	7.59878	8.21937	8.7272	8.30429	5.76186	5.28695	6.69587	5.5343	5.87606	7.16165	5.70915	5.81406	6.52627	7.19625	5.33457	6.99033	5.85297	6.10602	4.96924	5.02577	7.1126	6.25115	5.17385	4.25761	5.60532
LOC100506302	1.00763	5.36207	9.11325	1.10011e-15	1.36069e-14	24.9255	UP	6.22772	6.45819	6.0335	6.48429	6.37543	5.94782	6.30758	6.13983	6.16096	6.22569	6.27272	6.16266	6.24413	6.06588	6.00088	6.43179	6.06505	5.8314	6.30031	6.25179	6.40961	5.51392	5.42029	5.64164	4.80762	5.01343	5.46359	5.38993	4.32913	5.13482	5.12588	4.83721	5.06986	6.3258	5.10393	5.22858	4.95777	4.53819	4.61545	4.95656	4.45346	4.82231
LOC100506718	-1.04805	5.33679	-5.44013	2.48589e-07	8.70643e-07	5.9988	DOWN	4.29175	4.25075	4.39659	4.54377	5.15253	4.20911	4.28516	4.40082	4.53937	4.2276	4.47797	4.42567	4.40977	4.76693	4.24455	4.9169	4.3445	4.71003	4.3026	4.41107	4.25756	6.46533	6.13491	5.44007	4.48922	6.13442	4.96485	5.29013	5.37255	4.61728	4.90232	6.97984	6.70767	5.05024	5.47149	5.5743	5.77507	6.06002	5.82802	3.88652	6.75737	4.96311
LOC100507165	-1.404	4.90993	-7.93658	7.75299e-13	6.26847e-12	18.4413	DOWN	3.45192	3.70929	3.53042	3.91695	3.49249	3.71072	3.92754	3.67351	4.01665	3.82069	3.64727	3.6491	3.88143	3.38656	3.73134	3.72071	4.09676	3.70359	3.94249	3.46177	3.84392	5.40776	5.85316	4.8197	4.49125	5.76822	4.83813	5.72489	5.85149	4.0705	4.24516	6.62026	5.60565	4.40727	4.94027	5.23679	6.43793	5.64194	6.95224	4.1074	6.49883	5.0515
LOC100507311	-1.09383	4.81451	-4.87768	3.02619e-06	8.98641e-06	3.5759	DOWN	3.45989	3.60855	3.80756	5.19015	5.39751	3.37218	3.61619	3.75048	3.9717	3.30293	3.65036	3.6946	3.4766	4.45049	3.56708	4.69269	3.76734	4.10596	3.66129	3.84649	3.3986	4.86297	4.42915	4.23091	4.14793	6.05218	5.14001	5.55488	4.75562	3.7763	3.82902	6.95455	5.67556	4.03034	4.76305	4.57185	4.92062	6.13387	4.548	3.57971	5.67216	6.15837
LOC100507487	1.36622	5.37409	10.484	4.24707e-19	8.93975e-18	32.716	UP	5.61378	6.06852	6.38578	7.01864	6.98905	6.89507	6.60719	7.22274	7.0418	7.12065	6.3302	6.24097	6.54826	6.34062	5.84944	6.29514	6.50871	6.61587	6.07187	6.71401	6.50373	5.37235	4.87328	5.67141	4.65028	4.92854	5.55156	4.87611	4.21327	5.72457	5.14765	5.03041	4.90844	6.05669	5.35666	4.60179	5.20942	4.96124	4.24757	4.62723	4.40703	4.9892
LOC100509457	-1.43358	7.2628	-3.82001	0.000204239	0.000448175	-0.456498	DOWN	7.45046	5.21763	9.6633	6.94978	4.94598	8.22984	4.80566	4.99274	5.24759	7.2448	4.35982	8.32428	5.45036	4.29745	6.6759	5.0135	4.92259	6.10825	5.2824	6.91864	5.10212	5.90704	9.18769	5.40676	9.46553	9.55368	8.60555	8.23321	8.36131	5.41718	7.55103	9.08068	5.74661	5.67953	7.76618	8.00369	6.94793	8.67408	9.49643	5.26633	9.29866	5.90629
LOC100652777	2.83094	8.2527	8.4572	4.38975e-14	4.23131e-13	21.278	UP	10.2594	10.3938	10.4927	10.7969	10.2384	10.8041	10.7116	10.9239	10.5682	10.9057	10.9121	11.0055	10.433	10.4056	11.081	10.538	10.7611	10.2887	10.4745	10.9747	10.3299	6.97449	6.22167	9.20125	5.77731	8.36262	8.75123	6.77715	7.30505	9.62762	9.85988	7.608	8.23194	6.66889	9.77362	9.58354	7.25605	8.23005	7.10613	6.94833	3.44862	6.46117
LOC100996583	1.18502	5.13452	7.23343	3.39341e-11	2.14415e-10	14.7156	UP	6.56689	6.42777	6.07678	6.67946	6.34345	5.46373	5.92082	5.94739	7.04799	6.15358	5.4696	5.73337	5.76472	5.56582	6.41795	6.31403	5.67556	5.6945	6.09337	6.62685	6.7676	5.70182	4.0914	4.87291	5.31074	5.07882	5.14782	4.62643	4.72053	4.58994	5.12854	4.71264	5.02741	4.16693	5.9173	4.35185	4.85872	5.04143	4.90545	4.28969	4.14193	4.06401
LOC100996741	-1.34097	4.73814	-10.8999	3.8263e-20	9.34947e-19	35.1045	DOWN	3.36164	3.69081	3.40422	3.56439	3.49133	3.37469	3.4306	4.42806	3.49216	3.70944	3.4234	3.87488	3.43432	3.42964	3.77949	3.87948	3.53722	3.55627	3.66497	3.65951	3.63406	5.7432	4.93766	4.11158	5.98894	4.76129	4.55746	4.44325	3.89798	4.27184	4.44416	5.45645	5.34494	5.52071	4.40748	4.25217	4.01497	5.01044	4.12902	4.53854	4.59686	4.37303
LOC100996782	1.57462	5.34088	16.5443	4.92123e-34	1.17243e-31	66.8744	UP	6.89601	6.99322	6.48656	5.41207	6.2605	6.6339	6.89076	6.79215	6.37268	6.80647	6.83839	6.89722	6.57431	6.77696	6.93523	6.3886	6.74303	6.62963	6.96231	6.45678	7.21789	5.05483	4.87125	5.38508	5.45276	5.25324	5.0803	5.22892	5.9392	5.9286	5.92139	5.0626	4.98278	5.03554	5.49247	4.91151	5.80449	4.96334	5.41383	6.48713	4.27037	5.121
LOC101060275	1.40258	8.66775	9.6956	3.97926e-17	6.11173e-16	28.2139	UP	9.41061	9.75625	10.0832	9.72468	9.63734	10.1583	9.80877	9.8623	9.69813	9.66797	9.74455	10.1386	9.71174	10.2355	9.83924	9.95133	9.75932	10.5396	9.63098	9.85002	9.5826	9.03533	9.6942	8.15093	9.10635	8.91431	8.43413	8.2389	8.01402	7.9692	8.64856	8.5627	9.17268	9.25361	9.48249	9.57541	7.77697	9.17838	7.6692	7.01051	8.80051	7.97588
LOC101926921	-1.30557	6.90884	-11.3126	3.49889e-21	1.00348e-19	37.479	DOWN	5.56906	6.01311	6.07291	5.72269	5.70778	5.75984	5.85376	5.68462	5.81272	5.59051	5.50912	5.73051	5.78868	5.80274	5.65249	5.94261	5.82203	6.34999	5.87472	5.68655	6.08405	7.43437	7.56854	7.11944	6.68129	7.14337	7.10517	7.40574	6.962	7.11179	6.4581	7.21263	7.39439	6.73038	6.99798	7.55155	6.8332	7.13884	7.56612	6.89635	8.56005	7.01986
LOC101927263	-1.01067	4.5155	-4.86065	3.25559e-06	9.61317e-06	3.50532	DOWN	3.13423	3.68521	3.30702	5.32728	5.14017	3.29765	3.49796	3.55306	3.98406	3.44022	3.43369	3.20815	3.43595	3.55454	2.70141	4.30774	3.87791	3.79988	3.37795	3.56578	3.34803	4.55913	4.14698	3.82369	4.17535	5.28464	5.96018	5.23998	5.31115	4.99923	4.00114	5.61373	5.06558	3.49428	3.87177	3.7567	5.33591	5.86811	5.78028	3.59195	5.93233	6.43868
LOC101927391	1.0406	3.73423	8.81392	5.96274e-15	6.56559e-14	23.2526	UP	4.08272	4.2726	4.2825	5.15196	5.40137	4.76115	5.0916	5.20216	4.26324	5.02226	4.41493	5.09834	4.49641	4.66649	4.08657	5.27249	4.24887	3.83697	4.30693	4.91045	3.92489	3.9174	2.82715	3.31332	3.26651	3.1507	3.473	2.89809	2.97113	4.24302	4.04254	3.43337	3.31695	3.45764	3.57071	3.29367	2.95105	3.68102	2.7429	3.33579	3.12349	4.6409
LOC101927934	1.04367	4.8428	9.86502	1.50547e-17	2.47935e-16	29.1774	UP	5.90987	5.93169	5.62049	5.47251	5.07398	6.06373	5.56394	5.93669	5.58862	6.07064	5.84194	5.9581	5.77064	5.60379	6.12969	5.29535	5.49869	5.13958	5.78031	5.80499	6.07395	4.31741	4.31654	4.50089	4.51349	4.1448	5.06686	5.12685	4.45402	4.73436	5.17432	4.3414	4.19063	4.99831	4.8534	4.87421	5.23241	5.06804	4.70333	6.52055	4.48591	4.2332
LOC101928195	-1.07025	6.2962	-9.56918	8.20486e-17	1.20797e-15	27.4967	DOWN	6.08783	6.3368	5.24001	4.8282	4.27445	5.3586	5.7868	5.16544	5.18486	5.45012	5.35674	5.25587	5.30991	5.03459	5.60564	5.00926	5.89766	5.90955	5.40673	5.05236	5.76918	6.22475	6.84654	6.47635	6.94778	6.43968	6.2297	6.35271	6.67918	6.23746	5.88172	6.19333	6.58511	6.49657	6.11032	6.17255	6.44182	6.20273	7.12595	6.89406	6.39649	6.87267
LOC101928274	1.86212	5.90707	15.7278	4.25437e-32	7.37132e-30	62.4459	UP	7.38496	7.63108	7.3772	7.34659	7.04142	7.22998	7.47215	7.67781	7.16554	7.67335	8.02121	7.56377	8.00028	7.08745	7.98298	7.10524	7.50908	6.82666	7.67182	7.49699	7.66644	5.76328	5.40321	6.46907	6.63756	5.64916	5.4875	6.17713	4.89024	5.81307	6.16862	4.95924	5.38739	6.2637	5.7083	5.86573	4.79293	5.83051	5.54807	6.13136	5.07145	5.06991
LOC101928409	-1.42016	4.86865	-5.83434	3.92951e-08	1.56382e-07	7.79626	DOWN	3.43729	3.96153	3.87872	3.72803	3.75839	3.53349	3.71212	3.60586	3.61836	3.52596	3.36427	3.4152	3.60119	3.74271	3.69201	3.7369	3.80577	3.855	3.98068	3.32456	3.88487	4.9222	6.84483	4.15072	4.96359	4.81518	4.30726	6.06993	6.44272	4.36688	3.87539	5.96854	5.9083	4.42243	6.20154	5.86357	7.56296	5.60608	5.23618	4.08822	6.92915	5.91981
LOC101928605	1.14751	5.136	5.07633	1.27568e-06	4.01753e-06	4.41145	UP	6.4583	5.30115	5.18809	7.32516	5.2089	6.942	5.76504	5.91044	6.58441	5.30427	6.50128	5.5706	6.25694	6.69675	6.16318	7.53476	5.0336	4.17913	6.75154	7.30511	6.13938	6.32801	3.80044	6.63095	3.4849	4.8083	4.70304	4.9012	3.32154	6.7786	6.50126	5.68891	4.92205	5.65927	4.56597	4.46697	2.89091	5.00222	3.68391	4.78661	3.15035	4.17413
LOC101928881	1.60387	6.69211	14.3706	8.2468e-29	8.19403e-27	54.9263	UP	7.55416	7.98532	7.9411	7.98766	8.54248	8.2069	8.05025	8.5209	8.45491	8.43244	8.13524	7.89049	8.12597	8.02552	8.2333	8.30998	8.11148	7.89342	7.33102	7.83327	7.29144	6.30118	6.29443	6.56529	6.04419	6.03476	7.11677	6.71626	6.17265	6.72907	7.37699	5.78635	6.0396	5.89711	6.32337	5.94841	7.18407	6.33282	6.41085	7.09417	6.22324	6.72366
LOC101928916	-3.09917	9.27795	-14.0253	5.81826e-28	4.95853e-26	52.9851	DOWN	6.92889	6.7979	7.19675	5.98017	6.15621	6.88753	6.25663	6.00059	6.35942	6.12877	6.28904	6.56893	6.50671	6.67127	5.99961	6.86391	7.32896	8.03022	7.18687	6.96823	7.00194	10.0321	10.992	9.07004	11.2071	10.4996	9.85938	9.43746	10.1185	8.76794	8.48598	11.2308	11.0595	9.38042	11.004	10.0985	9.96223	9.5796	10.5075	7.99738	11.4072	9.64751
LOC101928963	1.01175	3.92507	14.2109	2.03354e-28	1.88643e-26	54.0296	UP	4.85106	4.45364	4.75708	4.52097	4.87258	4.83567	4.69314	5.14046	4.74565	4.93618	4.86711	4.96134	5.02255	4.94337	4.65238	5.07783	4.52469	5.027	4.26049	4.83012	4.31964	3.80539	3.14951	3.50343	3.67717	3.64255	3.43523	3.87332	3.67744	3.81643	3.93052	3.71102	3.59152	3.62676	3.78494	3.60091	3.47432	3.71712	3.57145	3.81325	3.42598	3.30116
LOC101929340	2.05476	4.10211	18.4845	1.68708e-38	8.42136e-36	77.0764	UP	5.38758	5.27854	5.55601	5.4369	5.57481	6.20551	5.63757	6.04852	5.61437	6.41312	6.64797	6.6393	6.13647	5.80406	6.63516	5.50249	5.66264	5.12158	5.33331	6.63516	5.15838	4.06975	3.19644	3.88485	4.33502	3.52583	3.54733	3.70539	2.78098	4.11008	4.63366	3.35399	3.31038	3.2072	3.77736	3.43871	3.18473	3.75718	2.87324	3.58145	3.29163	3.43523
LOC101929479	1.91749	5.88604	15.6864	5.34627e-32	8.96677e-30	62.219	UP	7.08895	7.36453	7.73698	7.90938	7.67594	7.9192	7.34629	8.09614	7.6477	7.86314	7.82057	7.44208	7.16809	7.56227	7.59889	7.57466	7.85551	7.64496	6.6502	7.52134	5.98111	5.27077	5.08793	5.23608	5.29821	5.85993	6.36495	4.90527	5.60433	6.4572	6.39802	4.48823	5.95008	5.69755	4.84129	5.4543	5.86718	5.21326	5.52263	5.81058	4.88093	5.68233
LOC101929740	1.20348	4.53342	19.2649	3.07742e-40	2.08123e-37	81.0462	UP	5.23188	5.31828	5.67356	5.54388	5.58595	5.91143	5.82522	5.45332	4.91512	5.42314	6.10636	5.95984	5.6105	5.60999	5.48216	5.15326	5.88913	5.76093	5.21365	5.55842	5.22798	4.30025	4.14935	3.94742	4.6009	3.8649	4.13879	3.91199	3.63124	3.9071	3.8376	4.41339	3.94806	3.97964	4.51967	4.52097	3.74575	4.54611	4.01264	4.04331	4.34708	4.13602
LOC101930067	1.01481	3.69242	3.66848	0.000352339	0.00074411	-0.971341	UP	4.68662	5.0998	3.55	4.3592	4.34651	5.04556	4.92689	4.85768	6.63614	6.16689	3.78812	4.72601	4.70065	4.6781	3.81931	4.964	3.56235	4.99133	2.50263	3.58879	4.46496	5.7082	2.56085	3.73201	6.82243	4.92185	3.06346	3.05657	2.93203	4.83632	3.64358	2.68168	2.61986	3.40297	2.5785	2.66986	2.5229	3.47522	2.70573	4.95531	2.42102	2.74123
LOC101930322	1.14547	5.47965	8.26441	1.27932e-13	1.15408e-12	20.2208	UP	6.30517	6.5901	6.02622	6.23213	6.0892	6.34921	6.16287	6.58487	6.21552	6.70866	6.50598	6.92377	6.75823	6.35764	6.73155	6.23352	6.35153	5.98466	6.87729	6.46429	6.84827	4.23344	5.73324	5.83236	3.82138	4.76007	5.70597	5.98459	4.97167	5.83091	5.65809	4.65378	4.76775	5.87801	5.15441	5.15569	6.32667	5.90711	5.2848	6.58903	5.24263	5.68916
LOC101930361	2.01612	5.96567	9.61495	6.31492e-17	9.44985e-16	27.7562	UP	7.5916	8.17442	7.58694	7.82911	7.80227	6.66647	7.20041	8.15403	7.68966	7.943	8.16524	8.2873	7.67333	7.57307	7.70903	6.92128	7.75496	6.96052	7.26839	7.70021	8.23073	4.68657	4.37231	6.5045	5.16293	4.97671	5.95717	5.89818	6.2072	5.55894	7.05784	4.82731	5.7703	4.78358	5.86204	5.6537	5.7961	5.32427	5.14954	6.44667	4.03296	6.23158
LOC101930400	2.26808	7.02869	10.8107	6.41325e-20	1.50228e-18	34.5919	UP	8.8003	8.35312	8.9896	9.50389	9.00214	8.79019	9.07929	9.10963	9.19422	9.07513	8.96244	7.77177	9.22614	9.04253	9.30828	8.81688	8.77351	9.04815	8.84248	9.0768	8.88833	5.64479	6.61122	7.01962	5.07114	6.35588	8.65808	6.42829	6.11969	8.77115	7.84156	6.31521	5.12182	5.50372	6.4289	5.52583	6.14676	7.19493	7.00109	6.21069	6.97001	6.96294
LOC101930405	-1.0826	4.88632	-9.71188	3.62471e-17	5.60827e-16	28.3064	DOWN	4.09513	4.09132	4.53413	3.72957	3.85625	3.83009	3.77859	3.9141	3.74347	3.97476	3.74577	3.65738	4.18064	4.32311	3.8558	3.89525	4.04828	4.2225	3.96846	4.08213	3.96828	5.01915	5.18995	5.22721	4.72111	5.51625	6.18141	5.03279	5.32755	4.9076	4.9023	5.62122	4.94428	4.67287	4.69963	4.81125	6.20855	5.48645	5.51793	4.74722	4.40794	4.43087
LOC102723779	1.1304	5.35201	14.1906	2.28041e-28	2.07864e-26	53.9157	UP	6.52136	6.18552	6.07166	6.232	5.93516	6.52672	6.10431	6.06902	6.51908	6.29129	6.44538	6.8431	6.30674	6.09531	6.28801	6.27823	6.26392	6.38214	6.27834	6.66069	6.05608	4.6747	5.23447	4.78301	5.24247	4.67546	5.41101	5.42775	5.34516	5.41067	5.28159	5.18483	4.85907	5.23852	5.79398	4.84174	5.82526	5.4999	5.40674	5.25298	5.15049	5.01459
LOC102723983	1.3356	5.38988	10.1622	2.72224e-18	5.11395e-17	30.8732	UP	6.35491	6.78383	5.91159	6.08415	6.30013	6.59003	6.82893	6.75858	6.50553	6.96348	6.91813	6.39318	6.14571	6.50432	6.99671	6.62307	6.87581	6.11892	5.88904	6.90265	6.3242	4.81999	4.13842	5.69257	4.90666	5.39935	4.97875	4.94078	4.94304	5.31126	6.03195	4.08795	4.745	7.34935	4.49304	4.74632	5.05072	5.41493	4.73479	6.14434	3.87289	4.78575
LOC102724017	1.5348	6.57576	12.7591	8.12386e-25	4.40095e-23	45.7902	UP	8.08142	8.01946	7.70687	7.33085	7.42591	7.97532	7.8461	7.85729	7.77674	8.05816	8.15261	8.05317	7.73342	7.70485	8.01255	7.79401	7.75321	7.4727	8.20761	8.00579	8.22611	5.70262	5.83861	6.03933	6.45097	6.19032	6.42041	6.10312	6.00189	6.60793	7.09898	5.98908	6.547	6.78403	5.91021	6.24805	5.35469	6.95361	6.75235	5.84895	6.27589	5.332
LOC102724093	1.92763	7.80298	15.305	4.4085e-31	6.6974e-29	60.1234	UP	8.67743	8.86515	9.62149	10.0337	9.76569	9.7621	9.37746	9.42744	9.81393	9.63885	9.86629	9.39599	8.96703	9.67101	9.7036	9.54072	9.62727	9.43523	8.81948	9.76446	8.1285	7.85185	6.77966	7.29637	7.49988	7.28966	7.24726	6.79156	5.9155	7.25082	8.08721	7.43163	7.78272	7.92078	7.15639	6.8109	6.40053	7.65653	5.93212	6.73475	7.30242	7.43598
LOC102724094	1.22487	5.19749	12.4243	5.60209e-24	2.612e-22	43.872	UP	6.13236	6.35622	5.96653	5.55516	5.7306	6.49559	6.23659	6.60469	6.18414	6.63132	6.73347	6.11789	6.02847	6.48733	6.60125	5.68713	6.33596	5.69303	6.25089	6.59964	6.34906	4.65165	4.70427	5.46011	4.99985	5.92839	4.87689	4.63998	4.84349	4.91945	5.1815	4.89776	5.04543	4.63026	4.76127	5.72631	5.11553	5.34233	4.63595	4.74595	4.73501	4.53865
LOC102724156	1.72113	4.96724	13.9221	1.04552e-27	8.59578e-26	52.4028	UP	6.076	7.29208	6.38065	5.50421	6.95253	6.30958	6.30542	7.37505	6.70396	7.12981	6.9187	6.519	6.0235	6.69813	6.56367	6.56879	6.05501	6.08754	4.88112	6.87937	5.48153	4.42301	4.56477	4.0595	3.80544	4.62681	5.06275	4.48266	3.92065	4.95527	5.68084	4.3282	4.22517	5.4961	4.6918	4.29368	4.32842	4.79157	4.28415	5.73794	4.14338	6.05318
LOC102724229	1.08505	6.72914	5.96672	2.08205e-08	8.67278e-08	8.41659	UP	7.80922	7.94477	7.43938	7.279	7.02992	7.84849	7.34688	7.58455	7.23309	7.43671	7.58769	7.53211	8.14943	7.88298	7.31917	7.55764	7.63413	7.88411	8.32982	7.52134	8.12258	7.91635	7.45782	7.26782	5.42295	7.00233	6.08669	7.12705	7.58306	6.78093	6.73791	7.05811	7.19728	6.14455	6.75519	6.53078	8.23959	8.40824	5.28263	6.99085	7.37235	6.78144
LOC102724275	1.31155	3.98521	17.6382	1.41308e-36	5.10779e-34	72.6838	UP	4.38675	4.53365	4.51429	4.05307	4.83974	5.15281	5.5343	5.24072	5.75492	5.60443	5.4843	5.66543	5.464	5.77662	5.69935	5.12254	4.28831	4.72085	5.0164	5.7489	4.24884	4.01436	3.34593	3.61762	3.43364	3.67643	3.67449	3.52837	3.3828	3.6136	3.90368	4.11525	3.89186	4.27943	3.61326	3.74927	3.67074	3.83901	3.65836	3.80379	3.82347	3.92456
LOC102724611	-1.09443	4.17225	-6.3041	3.99036e-09	1.85824e-08	10.033	DOWN	3.04194	2.93105	3.37873	3.43745	3.42997	3.18074	3.12683	3.25062	3.1384	3.18911	3.27076	3.27547	3.15321	3.24175	3.2169	3.36448	3.27066	3.30941	3.302	3.54681	3.23443	4.88992	4.21109	3.65965	3.69369	4.00261	4.06369	4.98194	5.76517	3.89804	3.69026	5.29725	5.63832	3.67657	4.4503	5.14988	7.05224	4.21763	4.32514	3.73979	3.78776	8.9029
LOC102724689	2.56772	4.26059	12.8067	6.17694e-25	3.39004e-23	46.0624	UP	6.41025	8.07316	8.04686	6.57895	4.82371	7.0058	7.77657	6.40588	6.9256	5.77241	8.00144	7.85237	7.27502	6.22382	8.1003	3.42753	6.43939	3.52662	6.40513	5.08244	4.6628	3.87378	3.18691	3.40029	3.91657	3.2057	3.53375	5.46344	3.89911	3.9008	3.66842	3.50844	3.5953	3.30454	3.48667	3.65364	5.36886	3.21844	3.16341	4.15699	4.85446	3.25461
LOC102724788	-1.02602	5.18164	-6.60662	8.73508e-10	4.50396e-09	11.5225	DOWN	4.24685	4.55991	4.60236	4.53554	4.6722	4.07052	4.39962	4.33255	4.42722	4.2272	4.12745	3.90606	4.96534	4.21746	4.14134	3.74206	4.25332	4.25309	4.60524	3.98816	4.42241	6.0103	5.7697	7.69649	5.39946	4.92899	5.52199	5.819	5.8794	5.12488	5.59745	5.20097	6.54529	5.8438	4.67887	6.5917	5.86861	5.57551	6.36345	6.33398	4.99763	5.06443
LOC102725271	-1.12147	5.3053	-5.69966	7.43973e-08	2.82715e-07	7.17355	DOWN	4.2413	4.37892	4.29757	3.94577	4.24348	4.49995	4.39543	4.2814	4.66849	4.32037	4.52616	4.68093	4.26001	4.69034	4.54737	4.6422	3.72246	4.31005	3.95171	4.93996	4.06334	5.72264	5.33789	5.02921	5.90304	5.97381	4.98156	5.70385	6.00546	5.557	4.68831	6.20967	6.96225	6.28945	6.03373	6.38287	5.572	5.59329	5.91678	4.97414	6.23821	4.00574
LOC105369635	1.40964	5.96649	14.3077	1.1765e-28	1.13143e-26	54.5733	UP	7.09949	7.38754	6.81255	7.10667	6.99281	7.1246	7.00993	7.05086	6.93663	7.16328	7.49308	7.29473	6.90919	7.47435	7.17871	7.39078	7.03834	6.78414	7.10048	7.66707	7.17419	5.96359	5.58216	5.91439	5.81867	5.84637	5.96689	5.61289	5.73744	6.53844	6.14181	5.12823	5.88169	6.1447	5.45861	5.23102	5.65505	5.68028	5.6436	5.76101	5.30771	5.21414
LOC105371708	1.02781	4.45688	7.6111	4.52885e-12	3.25385e-11	16.6999	UP	5.48387	5.53604	5.85237	4.85423	5.11774	5.4099	5.85522	5.9965	4.82827	6.00673	5.27696	5.88573	5.33186	5.38952	6.03583	5.41281	5.51701	4.84512	4.35405	4.85505	3.89995	3.93256	4.69513	4.25383	3.91795	4.76366	5.32089	4.14475	3.91469	4.42582	5.74748	3.42595	3.64473	3.53873	4.58451	4.70822	4.63754	3.87032	3.77243	3.86372	3.84947	4.02561
LOC105372526	1.29686	7.00156	8.62184	1.75156e-14	1.79831e-13	22.1865	UP	8.03875	8.18063	7.46684	8.44659	8.43615	8.30762	8.27088	8.05115	7.92544	8.09483	8.12136	8.02338	7.78876	8.54011	8.14024	8.35271	8.0195	8.25107	7.80719	8.06863	7.60218	6.65839	6.44379	6.59888	7.9261	6.83829	6.98383	7.20077	6.41451	6.42193	7.13025	6.96876	6.79626	8.12623	7.05007	7.15788	6.91462	6.22924	5.91451	5.93114	5.81835	6.00864
LOC105379499	2.002	6.40185	10.6866	1.31596e-19	2.97297e-18	33.8786	UP	7.1658	8.0165	8.61802	7.89526	8.03408	7.99973	7.60857	8.08839	8.2069	8.31667	8.63665	7.99257	7.80841	8.93503	8.69819	8.38598	8.01181	8.46865	7.18933	8.44359	7.27209	5.75136	5.46372	5.36415	7.30932	6.01815	5.71322	6.18148	5.34109	6.17287	6.21507	5.82424	6.60329	6.81668	5.87322	6.3538	5.31068	4.90885	4.23305	6.1866	5.7163	5.10275
LOC106146153	-2.10482	5.63544	-9.1476	9.05449e-16	1.13397e-14	25.1183	DOWN	4.09611	3.78034	4.44878	3.54843	3.57964	4.10463	3.78337	4.006	4.03495	3.77632	3.79081	3.87188	3.64288	3.81379	3.31992	4.24094	3.85538	4.04876	3.75651	3.93433	3.7413	6.26317	5.52496	5.03867	4.7506	6.9385	5.83138	7.20661	7.53602	5.83113	5.14633	6.671	6.9378	7.46407	7.18084	6.04256	7.89412	6.51455	5.99532	5.38754	6.11792	5.03537
LOC143286	1.17821	4.6088	12.2792	1.29529e-23	5.75332e-22	43.0394	UP	5.62822	5.87889	4.94003	5.36454	5.16351	5.45989	5.95479	5.6251	5.10937	5.81218	5.77327	5.69017	5.77836	5.7684	5.97102	5.37156	5.47595	5.6542	5.51622	5.74542	5.90978	4.19294	4.22343	5.43956	3.91768	4.2669	3.9139	4.12075	4.28427	4.40075	5.06756	4.2755	3.76526	4.88409	3.92844	4.31977	4.9442	4.71414	4.24874	4.83225	4.06435	4.01708
LOC145474	1.8906	4.8757	13.3069	3.49378e-26	2.31064e-24	48.9163	UP	6.01482	6.22601	6.30694	7.05531	5.99414	6.87882	6.87274	6.53548	6.26389	6.70773	6.89791	6.68453	6.19429	6.87347	6.39475	6.64595	6.48049	6.78328	5.79054	6.51097	5.66394	4.50062	4.1788	3.73075	4.01941	4.33234	4.30444	4.1102	3.54067	4.35382	4.6284	4.26682	4.36444	4.15329	3.77736	3.59133	3.46749	5.19311	3.92179	3.53381	4.61755	3.64651
LOC158402	1.21722	4.17951	13.7598	2.63095e-27	2.05813e-25	51.4859	UP	5.23525	4.92207	4.69466	5.15463	5.24429	5.2741	5.03547	5.32177	5.47858	5.44133	5.44368	5.17366	5.10556	5.37722	5.38703	5.37362	5.31125	5.00419	4.85386	5.49723	4.93521	4.12196	3.67774	4.38741	4.43639	4.33595	4.01784	4.3221	3.77851	4.55732	4.58362	3.68125	4.14623	4.34948	3.6295	4.07824	3.55168	3.54423	4.29833	4.32988	3.53884	3.5591
LOC284219	-1.623	6.22727	-7.83996	1.31268e-12	1.02688e-11	17.9216	DOWN	4.9853	4.53055	4.46932	5.35189	5.10269	4.64588	5.30554	4.17492	5.07955	4.72761	4.52874	4.9207	5.11067	4.66476	5.07668	4.99856	4.87764	5.15123	5.22379	4.39057	4.79534	5.13258	6.48597	6.70193	5.0145	5.80541	6.0446	7.10104	6.54682	6.69098	5.93833	6.81062	5.34398	7.05797	7.18573	5.91059	7.05492	8.33256	7.22476	5.51843	7.25041	5.05432
LOC285812	-1.20121	6.86675	-5.17975	8.0689e-07	2.61621e-06	4.85535	DOWN	5.75009	6.06845	6.01333	5.09726	5.6766	5.98364	5.56433	5.52644	5.65203	5.65776	5.86583	6.50999	5.90424	6.06249	6.20778	5.40319	5.40982	5.29854	6.53433	6.17124	6.6322	7.11024	8.02139	5.55717	5.98	7.28713	6.78353	7.82924	7.19288	5.44564	6.59901	8.29386	6.97578	6.22717	7.12329	6.34507	7.48542	8.45538	8.33289	5.75738	8.56565	8.18596
LOC389831	1.63102	5.38272	7.78538	1.76575e-12	1.3575e-11	17.629	UP	6.84062	5.53223	4.10233	6.8144	7.10941	7.41367	6.93885	7.20454	7.10014	7.34139	6.02047	7.48427	6.78696	7.68426	7.05317	6.90109	6.81514	6.52392	6.1276	6.61594	7.42898	5.214	5.32096	5.50697	3.19358	4.71133	6.58581	5.35352	5.34547	5.16736	4.62883	5.17074	6.02886	3.5935	4.18469	4.37479	4.48742	5.79908	4.60227	5.04996	4.46956	4.97909
LOC400043	1.59222	8.33307	6.00176	1.75762e-08	7.42016e-08	8.58213	UP	8.63027	9.20869	9.81923	10.2921	10.616	10.1269	9.95533	9.79379	10.3686	9.61973	10.1754	10.299	9.27718	10.1793	9.82456	10.1471	10.0152	10.0671	7.89105	10.3176	6.48752	6.74027	7.48868	6.03879	5.81084	7.87923	9.73131	7.35853	7.42004	9.16349	8.74916	8.79142	6.99341	8.20164	8.35877	6.84845	8.94697	8.4557	7.95239	8.49199	7.04786	8.97877
LOC642846	-1.05432	6.30297	-10.4422	5.40918e-19	1.1118e-17	32.4761	DOWN	5.46493	5.73356	5.64426	5.34769	5.43238	5.0272	5.54769	5.93669	5.18723	5.22044	5.71226	5.14067	5.40964	5.00112	5.25777	5.4971	5.451	5.43488	5.20645	5.29507	5.79589	6.85536	6.62644	7.40454	7.71429	6.71002	6.14972	6.5453	7.07045	6.40764	6.21795	6.15756	6.99514	7.07592	6.63784	6.5752	6.75978	6.33355	6.41184	7.08688	5.83433	6.49485
LOC643201	1.5988	4.16452	18.4172	2.39081e-38	1.16566e-35	76.7306	UP	5.41981	5.03945	5.26863	6.44198	5.18431	5.6876	5.00875	6.12662	5.46896	5.64284	5.78527	6.37091	5.19324	5.07878	5.46687	5.67183	5.50178	5.08676	5.11259	6.22534	4.90602	3.74105	3.82522	3.79215	4.00072	3.65516	4.18324	3.73601	3.6323	4.44534	4.22763	3.48762	3.74488	3.54312	3.70619	3.78225	4.46419	3.74737	3.77492	3.98222	3.728	3.78574
LOC644656	1.02718	5.60718	9.07451	1.37006e-15	1.67093e-14	24.7082	UP	6.66248	6.59471	6.23466	6.61904	6.74626	6.18514	6.16625	6.61379	6.75648	6.57095	6.56627	6.52839	6.46748	6.7001	6.47438	6.55512	6.17459	6.17864	5.99746	6.81489	6.28284	5.41004	5.65878	5.09489	5.49435	4.87756	4.8477	5.14798	4.60642	5.11282	5.35513	5.73023	4.84368	6.06862	5.81505	4.93858	5.13437	5.2327	4.77799	5.61609	4.77587	4.85644
LOC727820	-1.00094	7.00156	-9.05821	1.50247e-15	1.82182e-14	24.6169	DOWN	5.98656	6.03713	6.54682	6.35361	6.28319	6.41346	6.08326	5.75491	6.27545	5.94699	6.14755	6.47245	6.14724	6.3102	5.94648	6.07846	6.1748	6.62653	6.2428	5.93126	5.5978	7.80988	7.1699	6.63176	7.41049	7.24971	6.8321	6.85764	6.30827	6.1299	6.63841	7.47169	7.40559	7.80324	6.77766	6.80902	5.84479	7.15863	6.45512	6.85613	6.98905	6.26965
LOC727916	1.44381	3.60276	10.9498	2.86551e-20	7.13485e-19	35.3915	UP	4.73164	4.73287	4.55503	5.04095	5.25618	4.50738	4.65929	5.20926	4.87372	5.57831	5.31531	4.99621	4.32033	4.10165	5.19222	5.02106	4.25237	4.50306	4.44582	5.2899	4.5718	2.63078	2.67913	3.53167	3.16597	3.32478	3.77819	3.9393	3.48961	4.00675	4.50367	2.86477	2.97568	4.66982	3.33246	3.34176	2.81229	3.39931	4.04018	3.62246	3.03658	3.1791
LOC728061	-1.42216	7.28788	-10.8117	6.3774e-20	1.49555e-18	34.5974	DOWN	6.30439	5.82636	6.06383	6.19875	6.14479	6.16488	6.28623	5.91098	6.24516	5.73578	6.1493	5.88824	5.95631	6.45081	6.16776	6.05422	6.11104	6.41756	5.77104	6.02652	6.05748	7.00305	7.53594	6.73354	6.99501	8.34886	7.16309	7.91271	8.32372	6.97555	7.43666	8.62038	7.745	8.08008	8.16514	7.64893	7.93099	7.76254	7.61366	7.18425	7.74515	6.11902
[truncated: 836 more rows]
[truncated: 90 more columns]
